# Supplementary material for: Synthesis of 4-arylamino-3-(trifluoromethyl)pyridazines and pyridazino[3,4-b]quinoxalines (as by-products) from 3-aroylmethyl-2-(trifluoromethyl)quinoxalines and hydrazine hydrate
Source: Royal Society of Chemistry journal article supplement (doi:10.1039/c5ra27032d), 2016-01-01

## Supporting Information

### **Synthesis of 4-Arylamino-3-(trifluoromethyl)pyridazines and Pyridazino[3,4-b]quinoxalines (as by-products) from 3-Aroylmethyl-2-(trifluoromethyl)quinoxalines and Hydrazine Hydrate**

Vyacheslav Y. Sosnovskikh,<sup>\*a</sup> Alexander V. Safrygin,<sup>a</sup> Roman A. Irgashev,<sup>ab</sup>

Marina A. Ezhikova,<sup>b</sup> Mikhail I. Kodess<sup>ab</sup>

*<sup>a</sup> Department of Chemistry, Institute of Natural Sciences, Ural Federal University, 620000 Ekaterinburg, Russian Federation*

*E-mail: [vy.sosnovskikh@urfu.ru](mailto:vy.sosnovskikh@urfu.ru)*

*[www.urfu.ru](http://www.urfu.ru)*

*<sup>b</sup> Institute of Organic Synthesis, Ural Branch of the Russian Academy of Sciences, 620990 Ekaterinburg, Russian Federation*

## <sup>1</sup>H, <sup>19</sup>F, and <sup>13</sup>C NMR spectra for new compounds

|     |                                                                                  |     |
|-----|----------------------------------------------------------------------------------|-----|
| 1.  | Copy of <sup>1</sup> H NMR spectrum of <b>8a</b> in DMSO- <i>d</i> <sub>6</sub>  | S6  |
| 2.  | Copy of <sup>13</sup> C NMR spectrum of <b>8a</b> in DMSO- <i>d</i> <sub>6</sub> | S7  |
| 3.  | Copy of <sup>19</sup> F NMR spectrum of <b>8a</b> in DMSO- <i>d</i> <sub>6</sub> | S8  |
| 4.  | Copy of <sup>1</sup> H NMR spectrum of <b>8b</b> in DMSO- <i>d</i> <sub>6</sub>  | S9  |
| 5.  | Copy of <sup>13</sup> C NMR spectrum of <b>8b</b> in DMSO- <i>d</i> <sub>6</sub> | S10 |
| 6.  | Copy of <sup>19</sup> F NMR spectrum of <b>8b</b> in DMSO- <i>d</i> <sub>6</sub> | S11 |
| 7.  | Copy of <sup>1</sup> H NMR spectrum of <b>8c</b> in DMSO- <i>d</i> <sub>6</sub>  | S12 |
| 8.  | Copy of <sup>13</sup> C NMR spectrum of <b>8c</b> in DMSO- <i>d</i> <sub>6</sub> | S13 |
| 9.  | Copy of <sup>19</sup> F NMR spectrum of <b>8c</b> in DMSO- <i>d</i> <sub>6</sub> | S14 |
| 10. | Copy of <sup>1</sup> H NMR spectrum of <b>8d</b> in DMSO- <i>d</i> <sub>6</sub>  | S15 |
| 11. | Copy of <sup>13</sup> C NMR spectrum of <b>8d</b> in DMSO- <i>d</i> <sub>6</sub> | S16 |
| 12. | Copy of <sup>19</sup> F NMR spectrum of <b>8d</b> in DMSO- <i>d</i> <sub>6</sub> | S17 |
| 13. | Copy of <sup>1</sup> H NMR spectrum of <b>8e</b> in DMSO- <i>d</i> <sub>6</sub>  | S18 |
| 14. | Copy of <sup>13</sup> C NMR spectrum of <b>8e</b> in DMSO- <i>d</i> <sub>6</sub> | S19 |
| 15. | Copy of <sup>19</sup> F NMR spectrum of <b>8e</b> in DMSO- <i>d</i> <sub>6</sub> | S20 |
| 16. | Copy of <sup>1</sup> H NMR spectrum of <b>8f</b> in DMSO- <i>d</i> <sub>6</sub>  | S21 |
| 17. | Copy of <sup>13</sup> C NMR spectrum of <b>8f</b> in DMSO- <i>d</i> <sub>6</sub> | S22 |
| 18. | Copy of <sup>19</sup> F NMR spectrum of <b>8f</b> in DMSO- <i>d</i> <sub>6</sub> | S23 |
| 19. | Copy of <sup>1</sup> H NMR spectrum of <b>8g</b> in DMSO- <i>d</i> <sub>6</sub>  | S24 |
| 20. | Copy of <sup>13</sup> C NMR spectrum of <b>8g</b> in DMSO- <i>d</i> <sub>6</sub> | S25 |
| 21. | Copy of <sup>19</sup> F NMR spectrum of <b>8g</b> in DMSO- <i>d</i> <sub>6</sub> | S26 |
| 22. | Copy of <sup>1</sup> H NMR spectrum of <b>8h</b> in DMSO- <i>d</i> <sub>6</sub>  | S27 |
| 23. | Copy of <sup>13</sup> C NMR spectrum of <b>8h</b> in DMSO- <i>d</i> <sub>6</sub> | S28 |
| 24. | Copy of <sup>19</sup> F NMR spectrum of <b>8h</b> in DMSO- <i>d</i> <sub>6</sub> | S29 |
| 25. | Copy of <sup>1</sup> H NMR spectrum of <b>8i</b> in DMSO- <i>d</i> <sub>6</sub>  | S30 |
| 26. | Copy of <sup>13</sup> C NMR spectrum of <b>8i</b> in DMSO- <i>d</i> <sub>6</sub> | S31 |
| 27. | Copy of <sup>19</sup> F NMR spectrum of <b>8i</b> in DMSO- <i>d</i> <sub>6</sub> | S32 |
| 28. | Copy of <sup>1</sup> H NMR spectrum of <b>8j</b> in DMSO- <i>d</i> <sub>6</sub>  | S33 |
| 29. | Copy of <sup>13</sup> C NMR spectrum of <b>8j</b> in DMSO- <i>d</i> <sub>6</sub> | S34 |
| 30. | Copy of <sup>19</sup> F NMR spectrum of <b>8j</b> in DMSO- <i>d</i> <sub>6</sub> | S35 |
| 31. | Copy of <sup>1</sup> H NMR spectrum of <b>8k</b> in DMSO- <i>d</i> <sub>6</sub>  | S36 |
| 32. | Copy of <sup>13</sup> C NMR spectrum of <b>8k</b> in DMSO- <i>d</i> <sub>6</sub> | S37 |

|     |                                                                        |     |
|-----|------------------------------------------------------------------------|-----|
| 33. | Copy of $^{19}\text{F}$ NMR spectrum of <b>8k</b> in $\text{DMSO-}d_6$ | S38 |
| 34. | Copy of $^1\text{H}$ NMR spectrum of <b>8l</b> in $\text{DMSO-}d_6$    | S39 |
| 35. | Copy of $^{13}\text{C}$ NMR spectrum of <b>8l</b> in $\text{DMSO-}d_6$ | S40 |
| 36. | Copy of $^{19}\text{F}$ NMR spectrum of <b>8l</b> in $\text{DMSO-}d_6$ | S41 |
| 37. | Copy of $^1\text{H}$ NMR spectrum of <b>8m</b> in $\text{DMSO-}d_6$    | S42 |
| 38. | Copy of $^{13}\text{C}$ NMR spectrum of <b>8m</b> in $\text{DMSO-}d_6$ | S43 |
| 39. | Copy of $^{19}\text{F}$ NMR spectrum of <b>8m</b> in $\text{DMSO-}d_6$ | S44 |
| 40. | Copy of $^1\text{H}$ NMR spectrum of <b>8n</b> in $\text{DMSO-}d_6$    | S45 |
| 41. | Copy of $^{13}\text{C}$ NMR spectrum of <b>8n</b> in $\text{DMSO-}d_6$ | S46 |
| 42. | Copy of $^{19}\text{F}$ NMR spectrum of <b>8n</b> in $\text{DMSO-}d_6$ | S47 |
| 43. | Copy of $^1\text{H}$ NMR spectrum of <b>9a</b> in $\text{DMSO-}d_6$    | S48 |
| 44. | Copy of $^{13}\text{C}$ NMR spectrum of <b>9a</b> in $\text{DMSO-}d_6$ | S49 |
| 45. | Copy of $^{19}\text{F}$ NMR spectrum of <b>9a</b> in $\text{DMSO-}d_6$ | S50 |
| 46. | Copy of $^1\text{H}$ NMR spectrum of <b>9b</b> in $\text{DMSO-}d_6$    | S51 |
| 47. | Copy of $^{13}\text{C}$ NMR spectrum of <b>9b</b> in $\text{DMSO-}d_6$ | S52 |
| 48. | Copy of $^{19}\text{F}$ NMR spectrum of <b>9b</b> in $\text{DMSO-}d_6$ | S53 |
| 49. | Copy of $^1\text{H}$ NMR spectrum of <b>9c</b> in $\text{DMSO-}d_6$    | S54 |
| 50. | Copy of $^{13}\text{C}$ NMR spectrum of <b>9c</b> in $\text{DMSO-}d_6$ | S55 |
| 51. | Copy of $^{19}\text{F}$ NMR spectrum of <b>9c</b> in $\text{DMSO-}d_6$ | S56 |
| 52. | Copy of $^1\text{H}$ NMR spectrum of <b>9d</b> in $\text{DMSO-}d_6$    | S57 |
| 53. | Copy of $^{13}\text{C}$ NMR spectrum of <b>9d</b> in $\text{DMSO-}d_6$ | S58 |
| 54. | Copy of $^{19}\text{F}$ NMR spectrum of <b>9d</b> in $\text{DMSO-}d_6$ | S59 |
| 55. | Copy of $^1\text{H}$ NMR spectrum of <b>9e</b> in $\text{DMSO-}d_6$    | S60 |
| 56. | Copy of $^{13}\text{C}$ NMR spectrum of <b>9e</b> in $\text{DMSO-}d_6$ | S61 |
| 57. | Copy of $^{19}\text{F}$ NMR spectrum of <b>9e</b> in $\text{DMSO-}d_6$ | S62 |
| 58. | Copy of $^1\text{H}$ NMR spectrum of <b>9f</b> in $\text{DMSO-}d_6$    | S63 |
| 59. | Copy of $^{13}\text{C}$ NMR spectrum of <b>9f</b> in $\text{DMSO-}d_6$ | S64 |
| 60. | Copy of $^{19}\text{F}$ NMR spectrum of <b>9f</b> in $\text{DMSO-}d_6$ | S65 |
| 61. | Copy of $^1\text{H}$ NMR spectrum of <b>9g</b> in $\text{DMSO-}d_6$    | S66 |
| 62. | Copy of $^{13}\text{C}$ NMR spectrum of <b>9g</b> in $\text{DMSO-}d_6$ | S67 |
| 63. | Copy of $^{19}\text{F}$ NMR spectrum of <b>9g</b> in $\text{DMSO-}d_6$ | S68 |
| 64. | Copy of $^1\text{H}$ NMR spectrum of <b>9h</b> in $\text{DMSO-}d_6$    | S69 |
| 65. | Copy of $^{13}\text{C}$ NMR spectrum of <b>9h</b> in $\text{DMSO-}d_6$ | S70 |
| 66. | Copy of $^{19}\text{F}$ NMR spectrum of <b>9h</b> in $\text{DMSO-}d_6$ | S71 |
| 67. | Copy of $^1\text{H}$ NMR spectrum of <b>9i</b> in $\text{DMSO-}d_6$    | S72 |
| 68. | Copy of $^{13}\text{C}$ NMR spectrum of <b>9i</b> in $\text{DMSO-}d_6$ | S73 |

|      |                                                                         |      |
|------|-------------------------------------------------------------------------|------|
| 69.  | Copy of $^{19}\text{F}$ NMR spectrum of <b>9i</b> in $\text{DMSO-}d_6$  | S74  |
| 70.  | Copy of $^1\text{H}$ NMR spectrum of <b>10a</b> in $\text{DMSO-}d_6$    | S75  |
| 71.  | Copy of $^{13}\text{C}$ NMR spectrum of <b>10a</b> in $\text{DMSO-}d_6$ | S76  |
| 72.  | Copy of $^1\text{H}$ NMR spectrum of <b>10b</b> in $\text{DMSO-}d_6$    | S77  |
| 73.  | Copy of $^{13}\text{C}$ NMR spectrum of <b>10b</b> in $\text{DMSO-}d_6$ | S78  |
| 74.  | Copy of $^1\text{H}$ NMR spectrum of <b>10c</b> in $\text{DMSO-}d_6$    | S79  |
| 75.  | Copy of $^{13}\text{C}$ NMR spectrum of <b>10c</b> in $\text{DMSO-}d_6$ | S80  |
| 76.  | Copy of $^1\text{H}$ NMR spectrum of <b>10d</b> in $\text{DMSO-}d_6$    | S81  |
| 77.  | Copy of $^1\text{H}$ NMR spectrum of <b>10l</b> in $\text{DMSO-}d_6$    | S82  |
| 78.  | Copy of $^{13}\text{C}$ NMR spectrum of <b>10l</b> in $\text{DMSO-}d_6$ | S83  |
| 79.  | Copy of $^1\text{H}$ NMR spectrum of <b>10m</b> in $\text{DMSO-}d_6$    | S84  |
| 80.  | Copy of $^1\text{H}$ NMR spectrum of <b>10n</b> in $\text{DMSO-}d_6$    | S85  |
| 81.  | Copy of $^{13}\text{C}$ NMR spectrum of <b>10n</b> in $\text{DMSO-}d_6$ | S86  |
| 82.  | Copy of $^1\text{H}$ NMR spectrum of <b>11a</b> in $\text{DMSO-}d_6$    | S87  |
| 83.  | Copy of $^{13}\text{C}$ NMR spectrum of <b>11a</b> in $\text{DMSO-}d_6$ | S88  |
| 84.  | Copy of $^1\text{H}$ NMR spectrum of <b>11b</b> in $\text{DMSO-}d_6$    | S89  |
| 85.  | Copy of $^{13}\text{C}$ NMR spectrum of <b>11b</b> in $\text{DMSO-}d_6$ | S90  |
| 86.  | Copy of $^1\text{H}$ NMR spectrum of <b>11c</b> in $\text{DMSO-}d_6$    | S91  |
| 87.  | Copy of $^1\text{H}$ NMR spectrum of <b>11d</b> in $\text{DMSO-}d_6$    | S92  |
| 88.  | Copy of $^1\text{H}$ NMR spectrum of <b>11e</b> in $\text{DMSO-}d_6$    | S93  |
| 89.  | Copy of $^1\text{H}$ NMR spectrum of <b>11f</b> in $\text{DMSO-}d_6$    | S94  |
| 90.  | Copy of $^{13}\text{C}$ NMR spectrum of <b>11f</b> in $\text{DMSO-}d_6$ | S95  |
| 91.  | Copy of $^1\text{H}$ NMR spectrum of <b>11g</b> in $\text{DMSO-}d_6$    | S96  |
| 92.  | Copy of $^{13}\text{C}$ NMR spectrum of <b>11g</b> in $\text{DMSO-}d_6$ | S97  |
| 93.  | Copy of $^1\text{H}$ NMR spectrum of <b>11h</b> in $\text{DMSO-}d_6$    | S98  |
| 94.  | Copy of $^1\text{H}$ NMR spectrum of <b>11i</b> in $\text{DMSO-}d_6$    | S99  |
| 95.  | Copy of $^{13}\text{C}$ NMR spectrum of <b>11i</b> in $\text{DMSO-}d_6$ | S100 |
| 96.  | Copy of $^1\text{H}$ NMR spectrum of <b>14a</b> in $\text{DMSO-}d_6$    | S101 |
| 97.  | Copy of $^{13}\text{C}$ NMR spectrum of <b>14a</b> in $\text{DMSO-}d_6$ | S102 |
| 98.  | Copy of $^{19}\text{F}$ NMR spectrum of <b>14a</b> in $\text{DMSO-}d_6$ | S103 |
| 99.  | Copy of $^1\text{H}$ NMR spectrum of <b>14b</b> in $\text{DMSO-}d_6$    | S104 |
| 100. | Copy of $^{13}\text{C}$ NMR spectrum of <b>14b</b> in $\text{DMSO-}d_6$ | S105 |
| 101. | Copy of $^{19}\text{F}$ NMR spectrum of <b>14b</b> in $\text{DMSO-}d_6$ | S106 |
| 102. | Copy of $^1\text{H}$ NMR spectrum of <b>15a</b> in $\text{DMSO-}d_6$    | S107 |
| 103. | Copy of $^{13}\text{C}$ NMR spectrum of <b>15a</b> in $\text{DMSO-}d_6$ | S108 |
| 104. | Copy of $^{19}\text{F}$ NMR spectrum of <b>15a</b> in $\text{DMSO-}d_6$ | S109 |

|                                                                              |      |
|------------------------------------------------------------------------------|------|
| 105. Copy of $^1\text{H}$ NMR spectrum of <b>15b</b> in $\text{DMSO-}d_6$    | S110 |
| 106. Copy of $^{13}\text{C}$ NMR spectrum of <b>15b</b> in $\text{DMSO-}d_6$ | S111 |
| 107. Copy of $^{19}\text{F}$ NMR spectrum of <b>15b</b> in $\text{DMSO-}d_6$ | S112 |

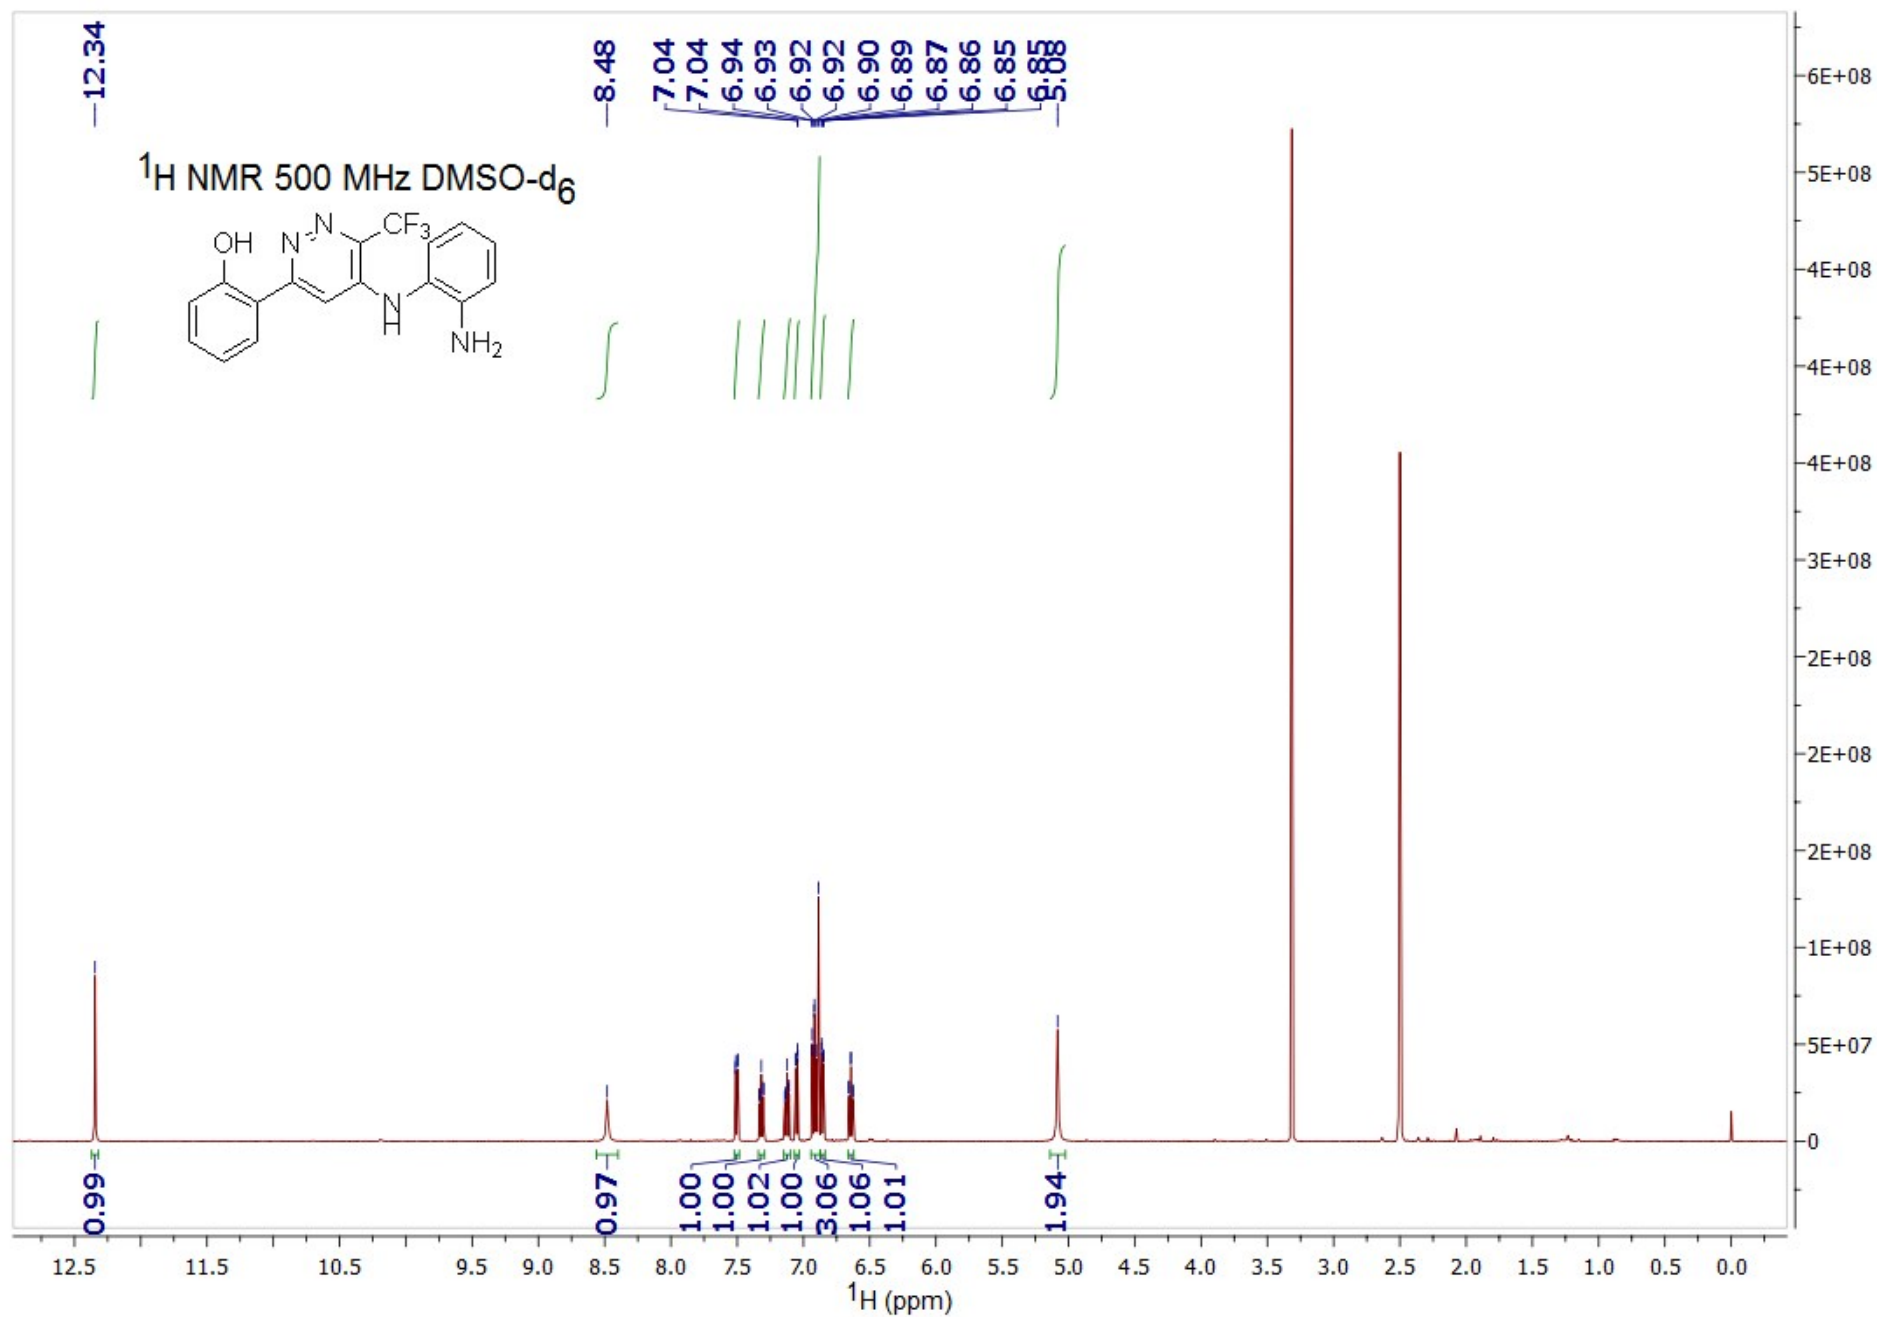

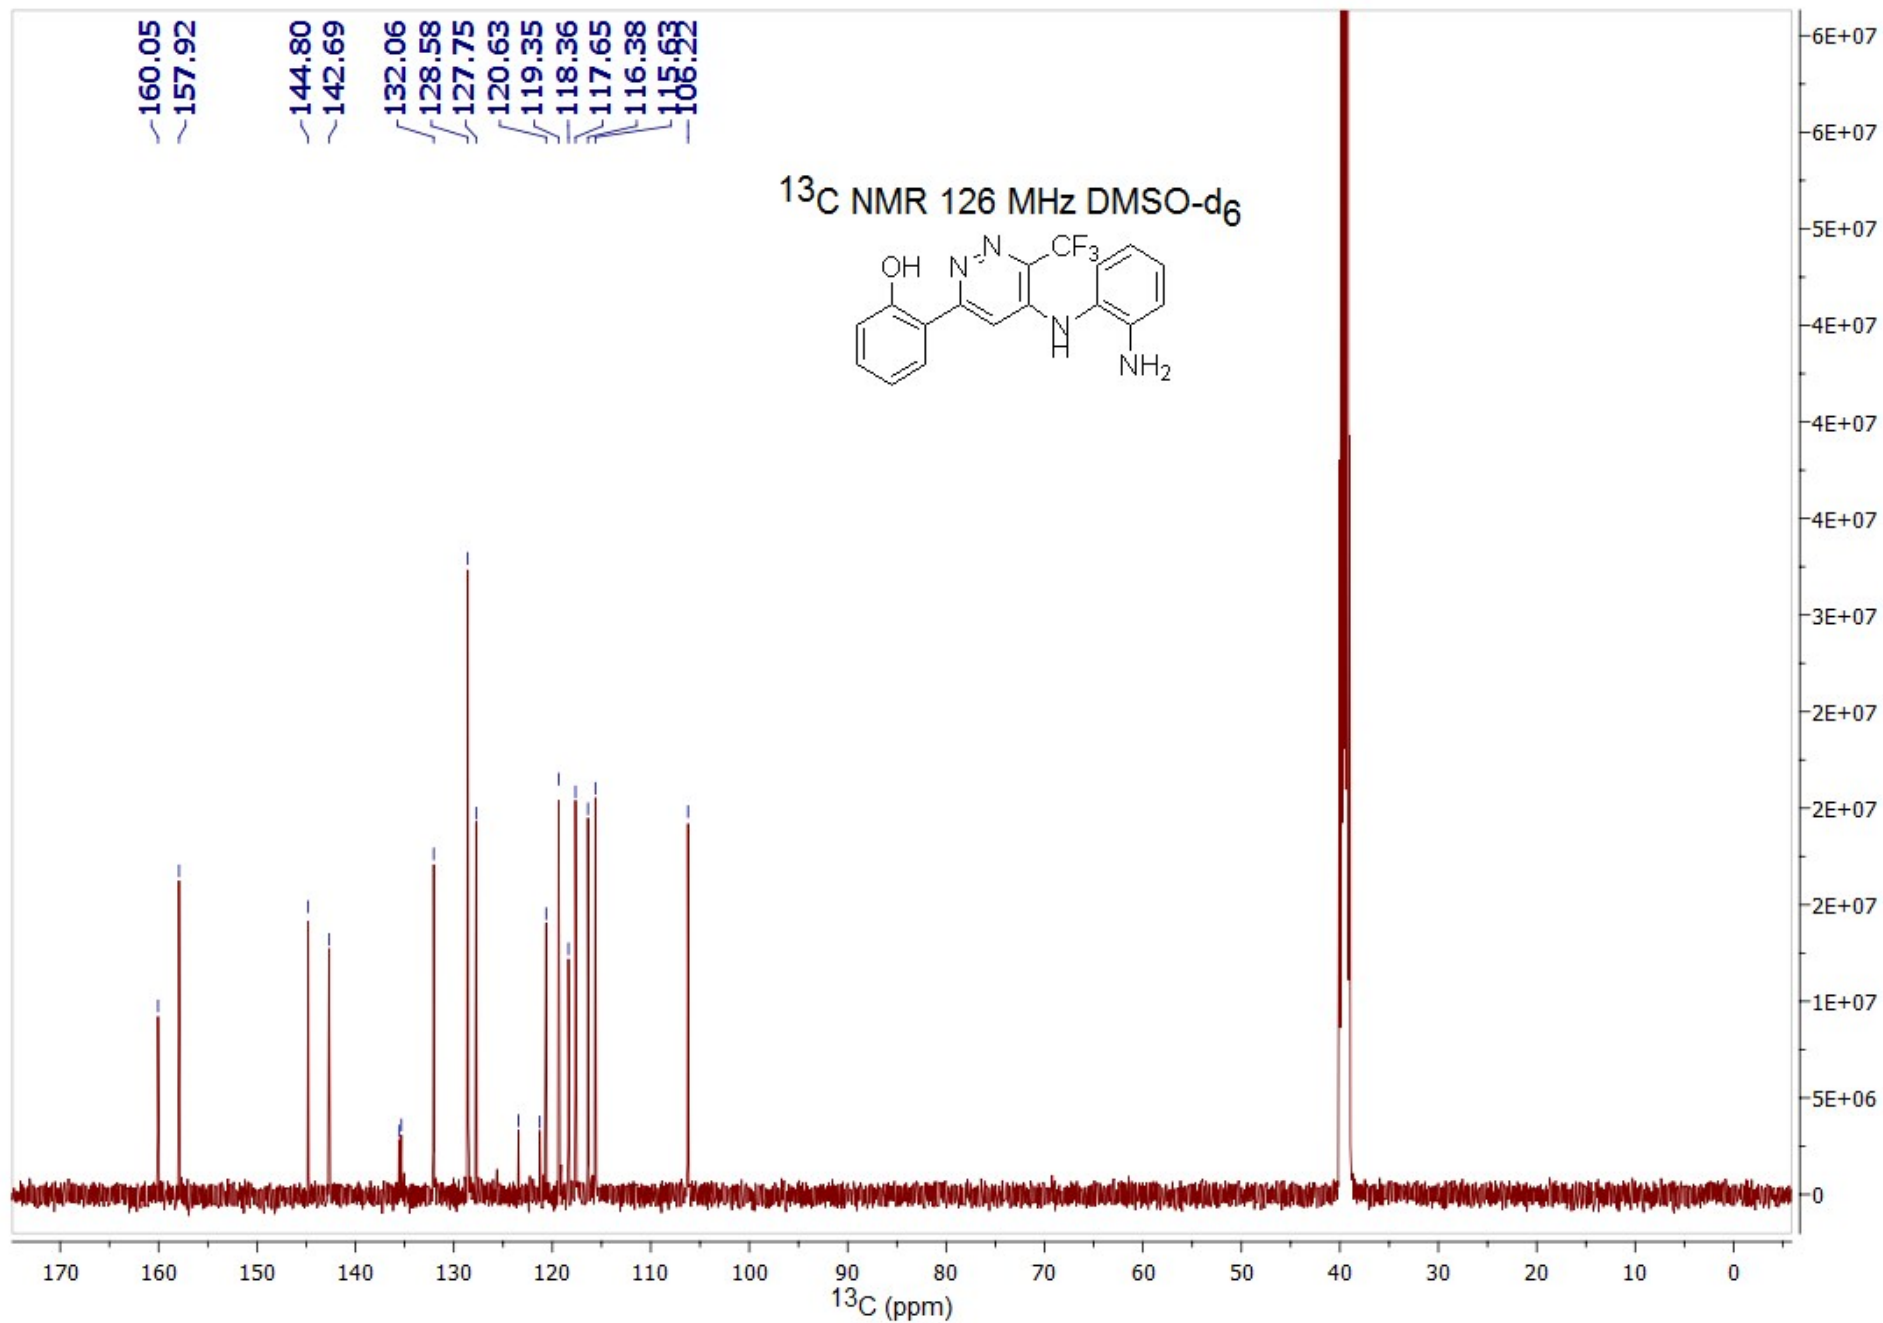

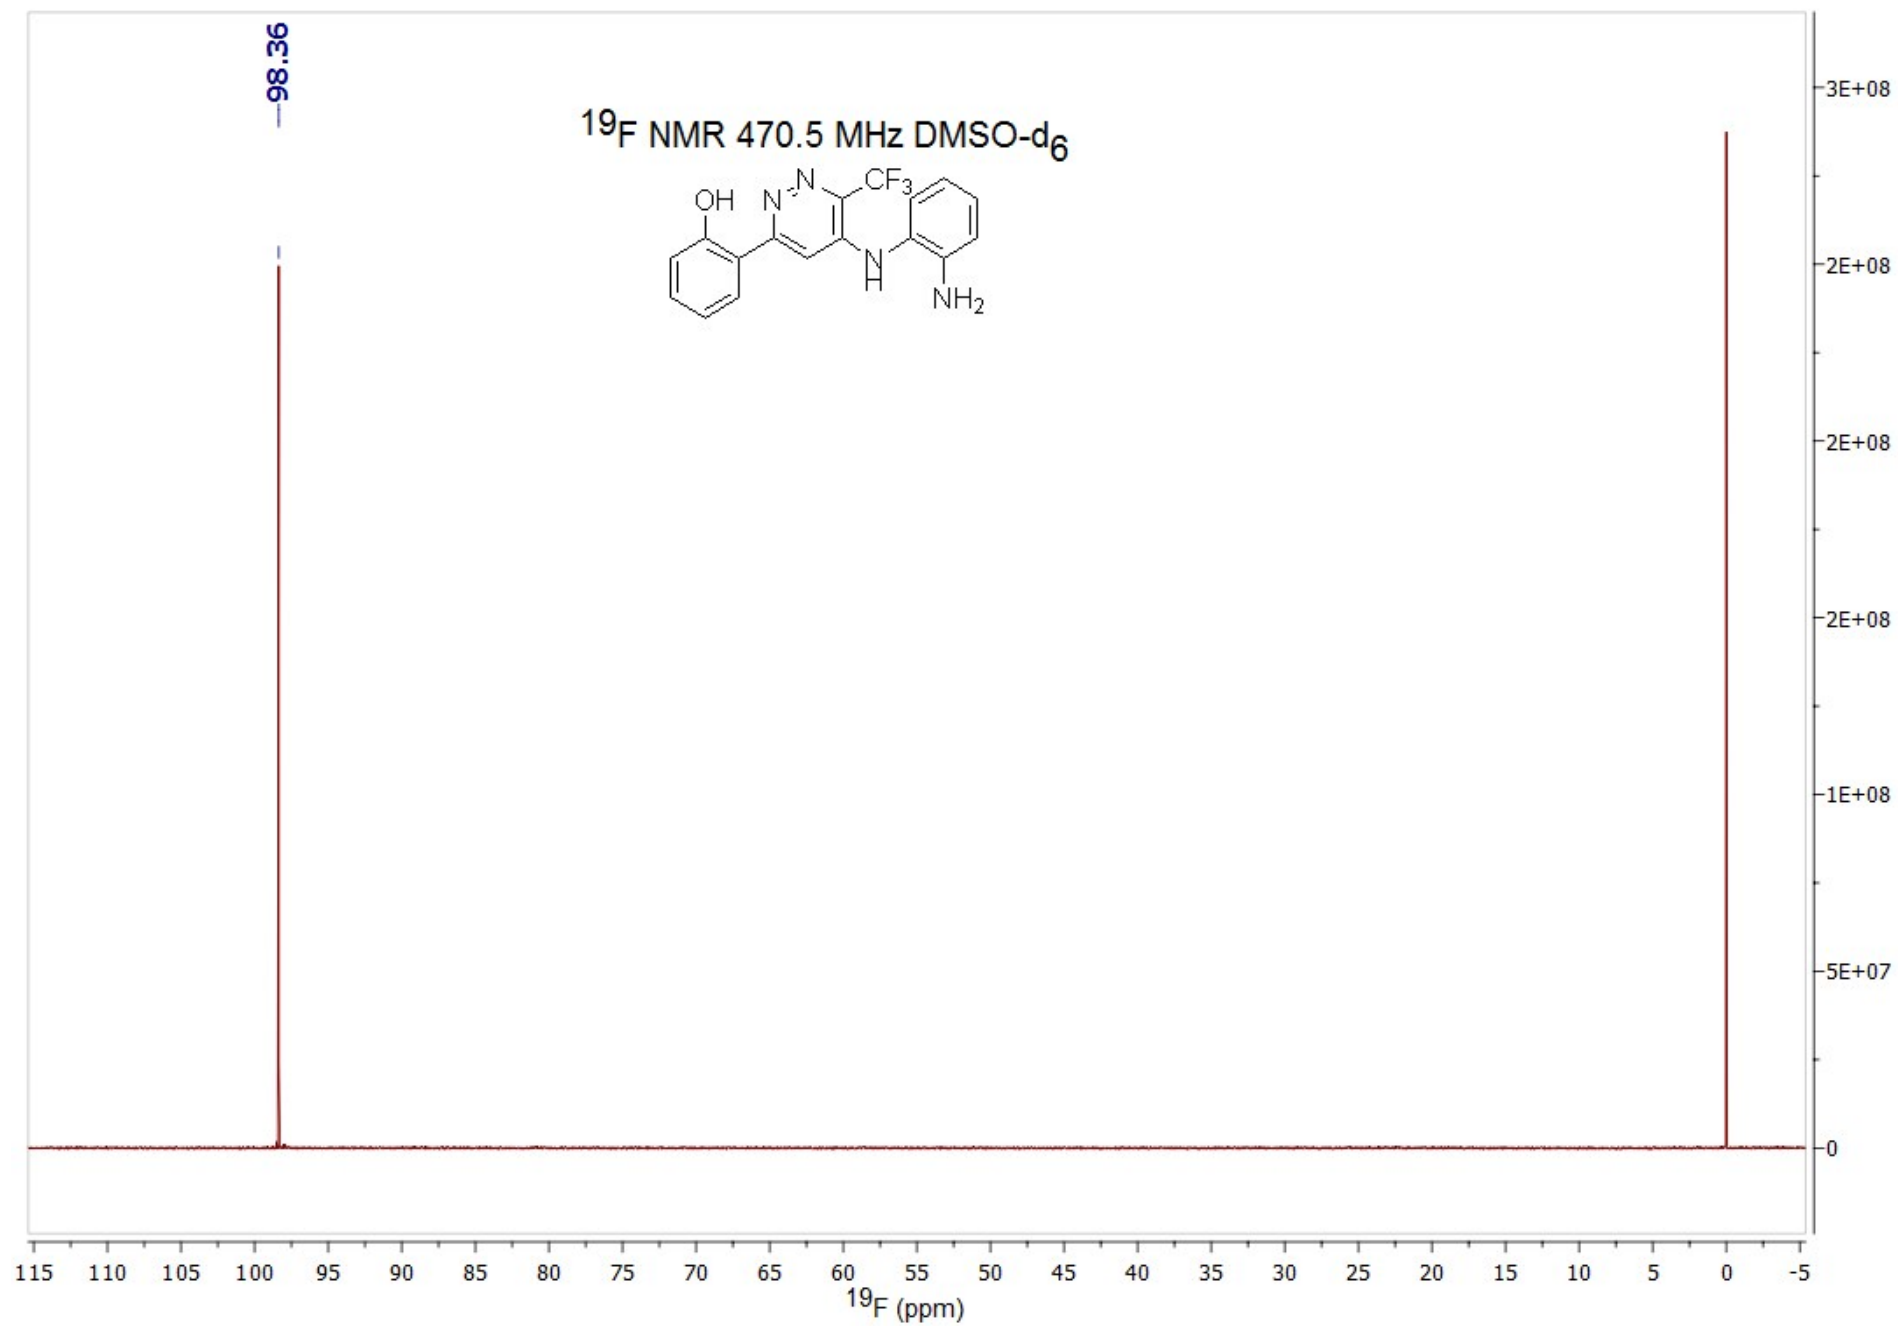



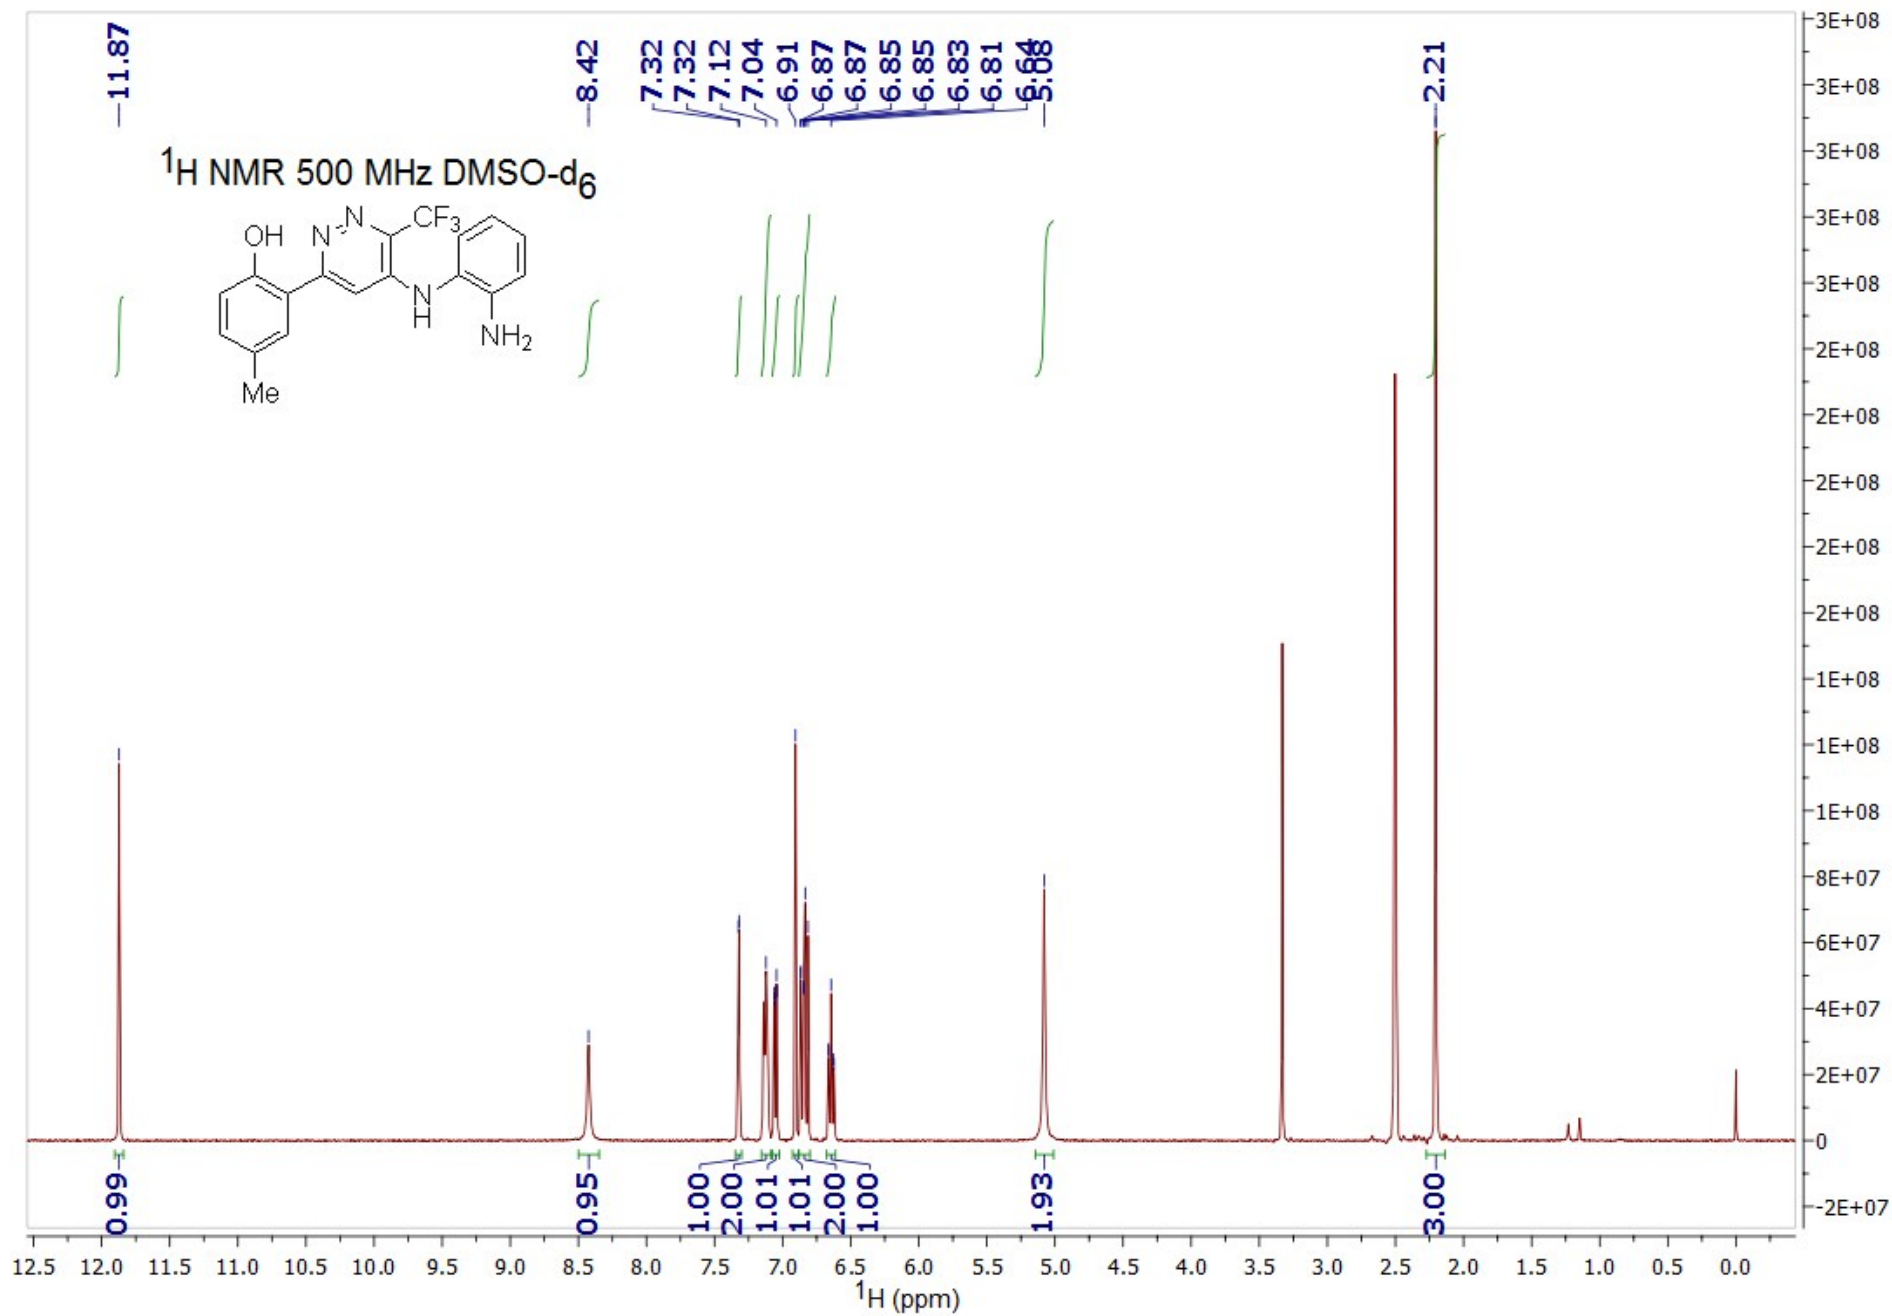

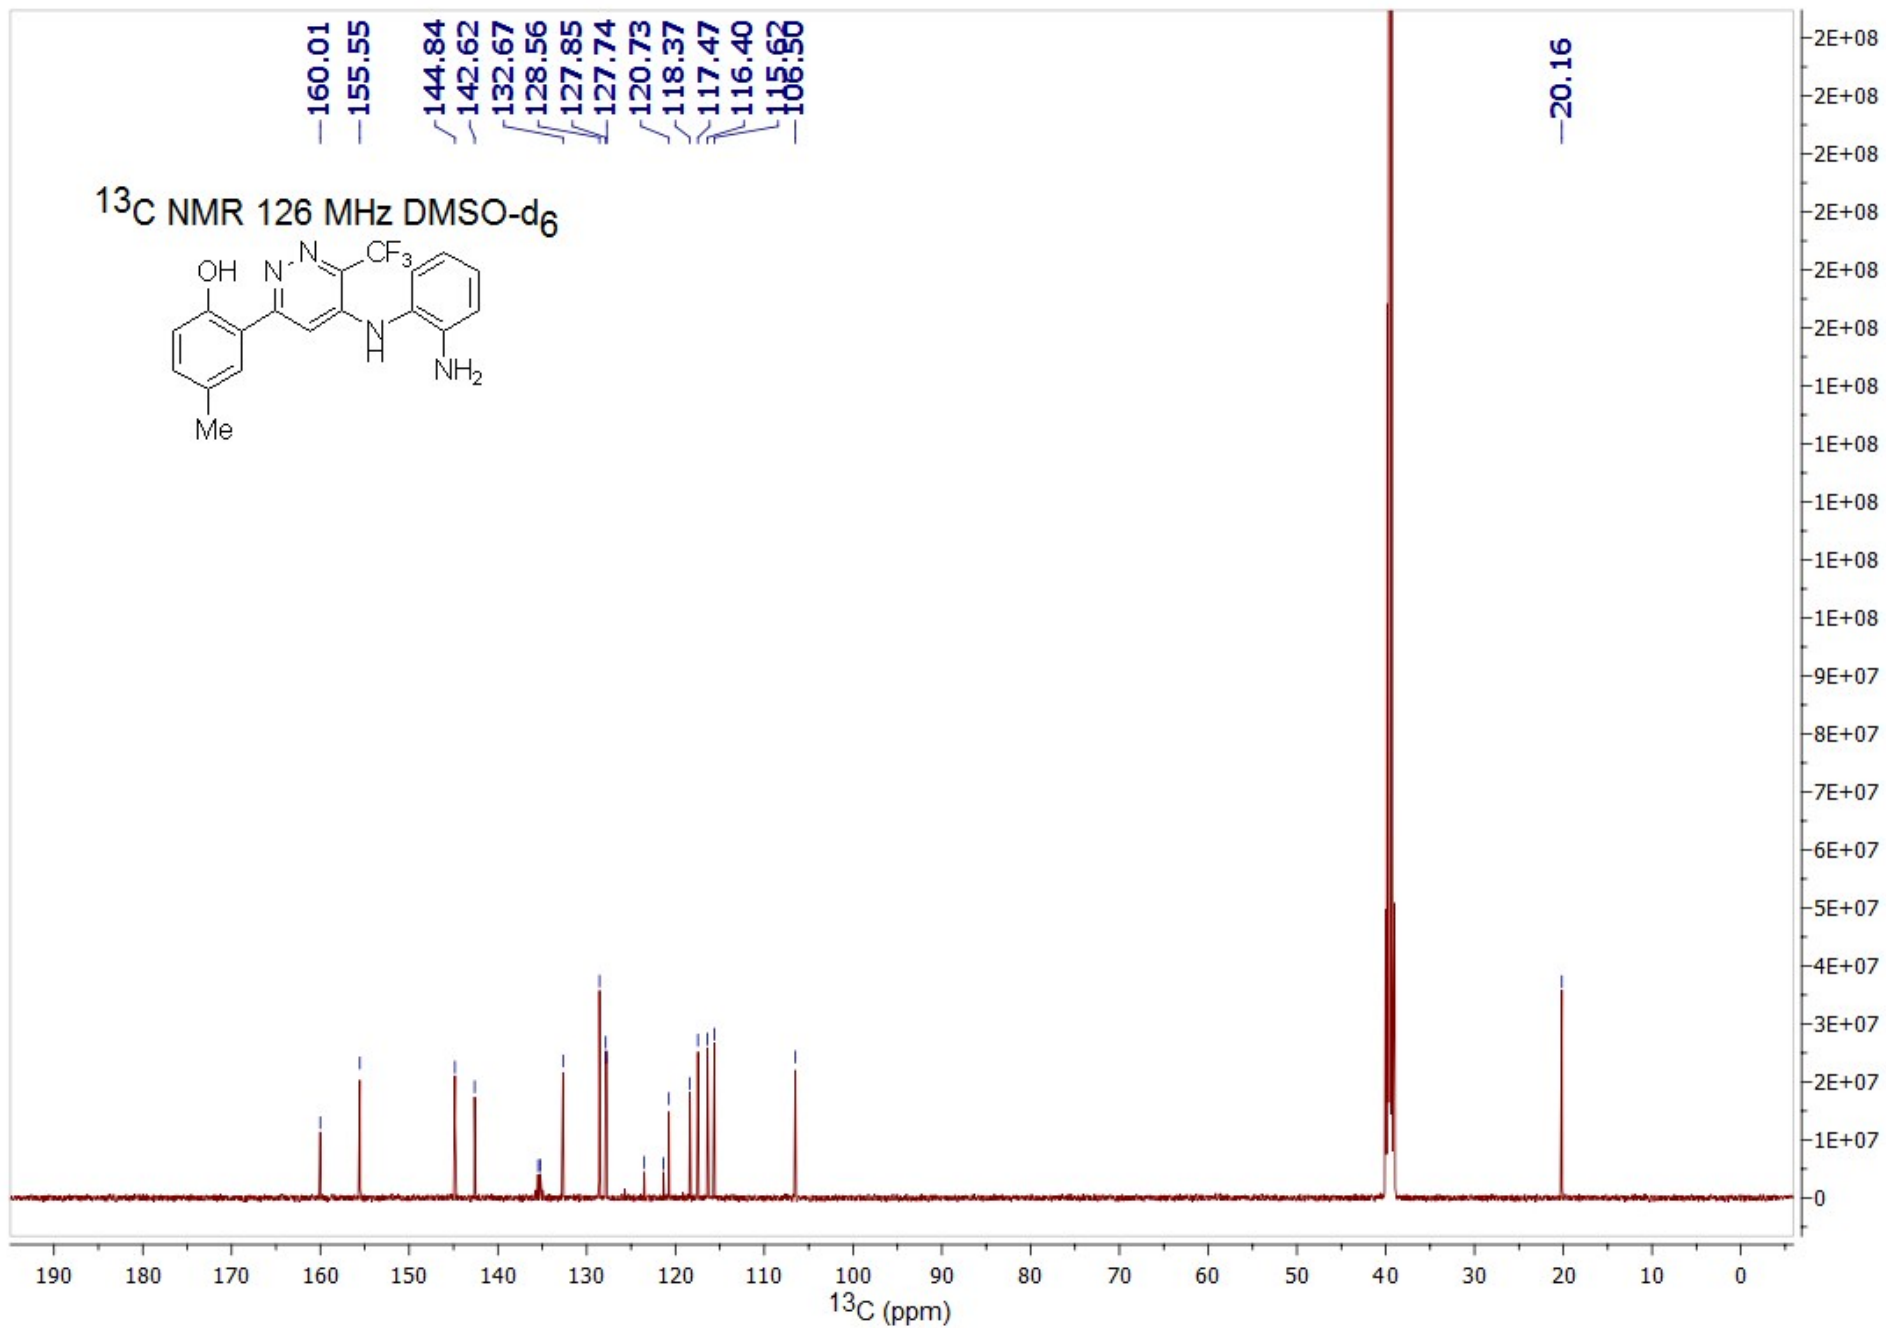

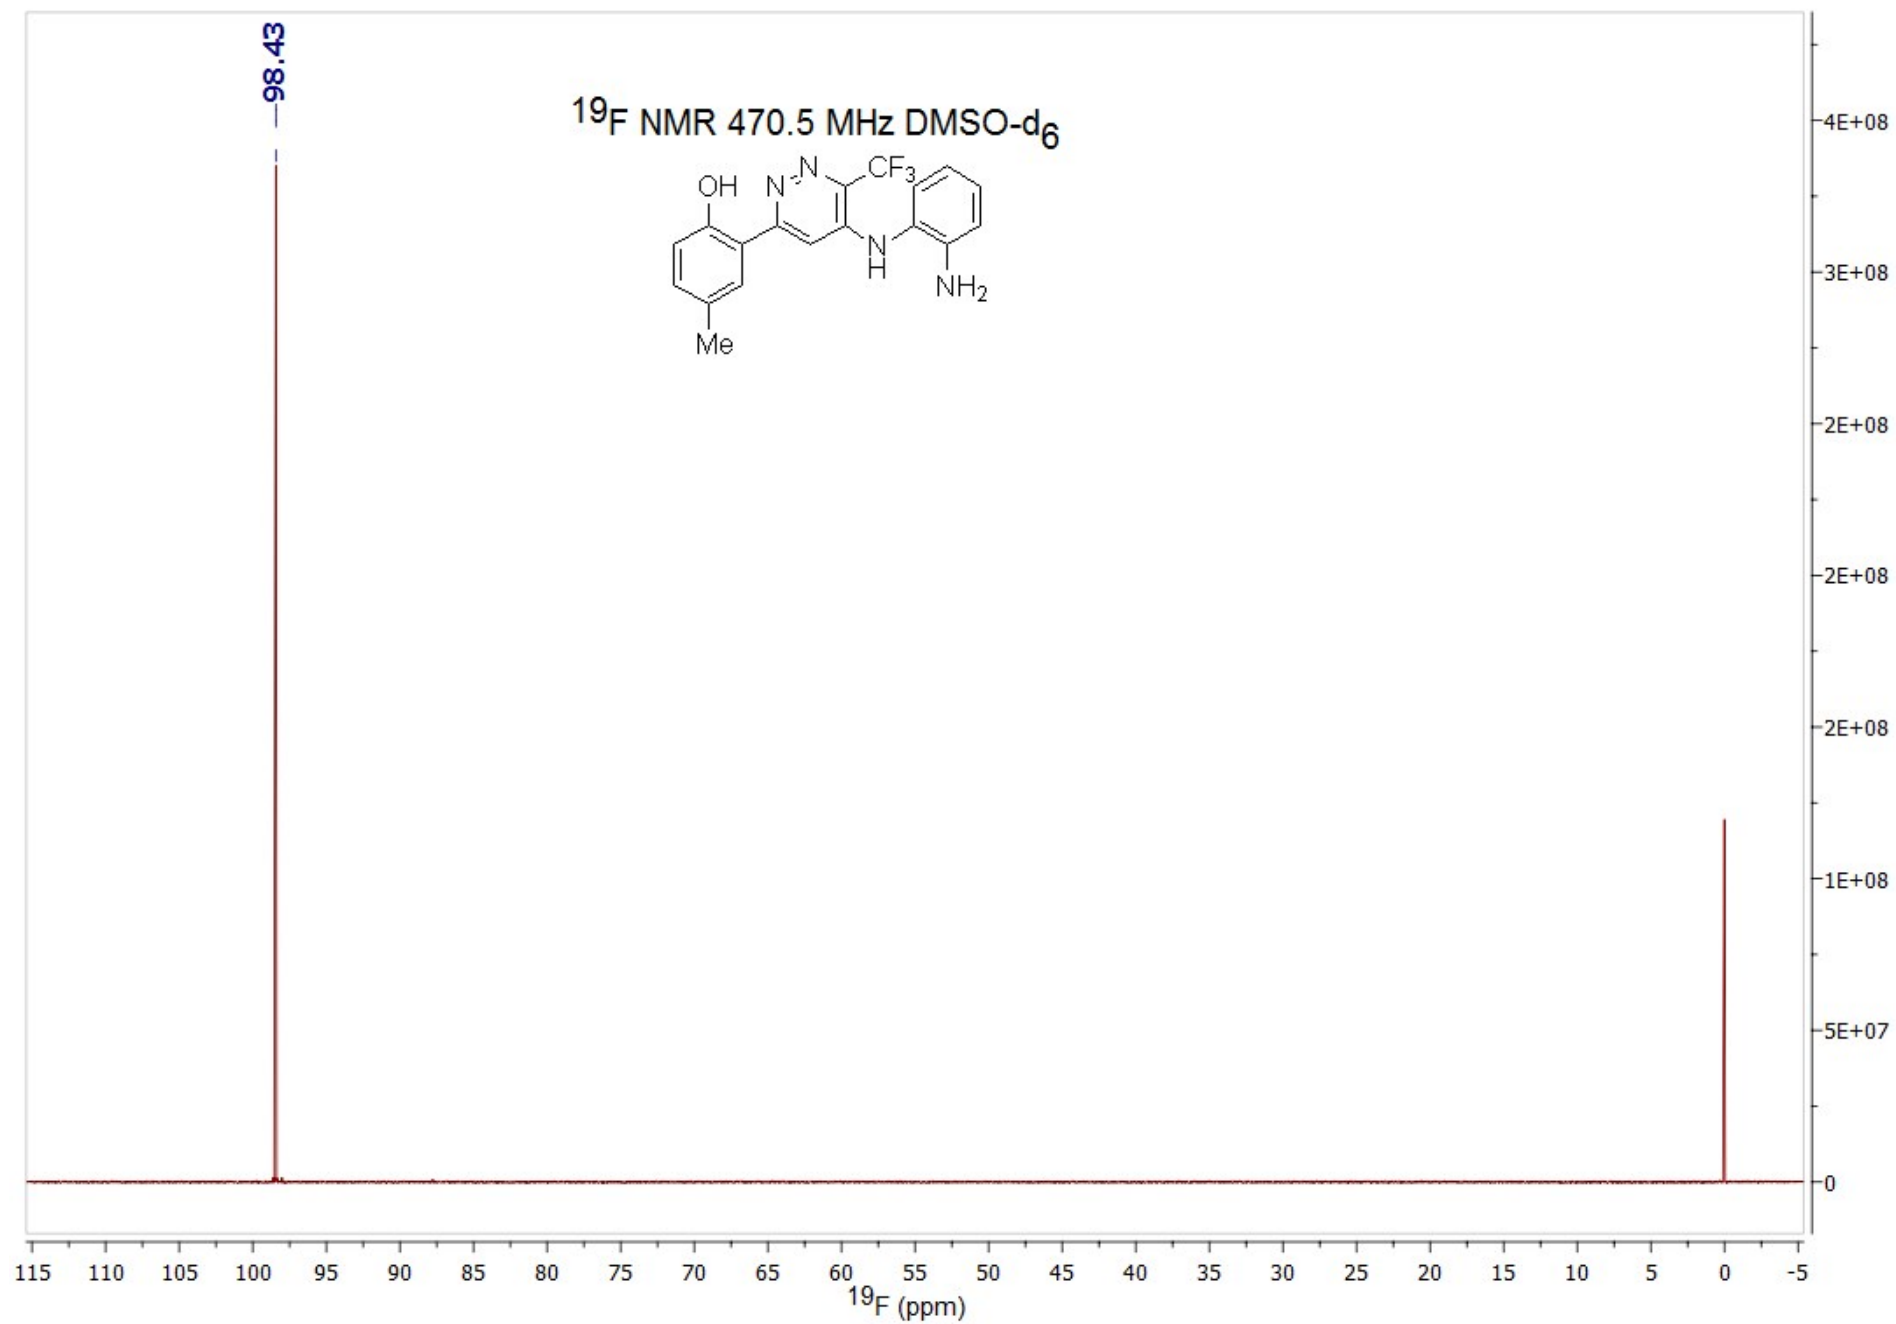

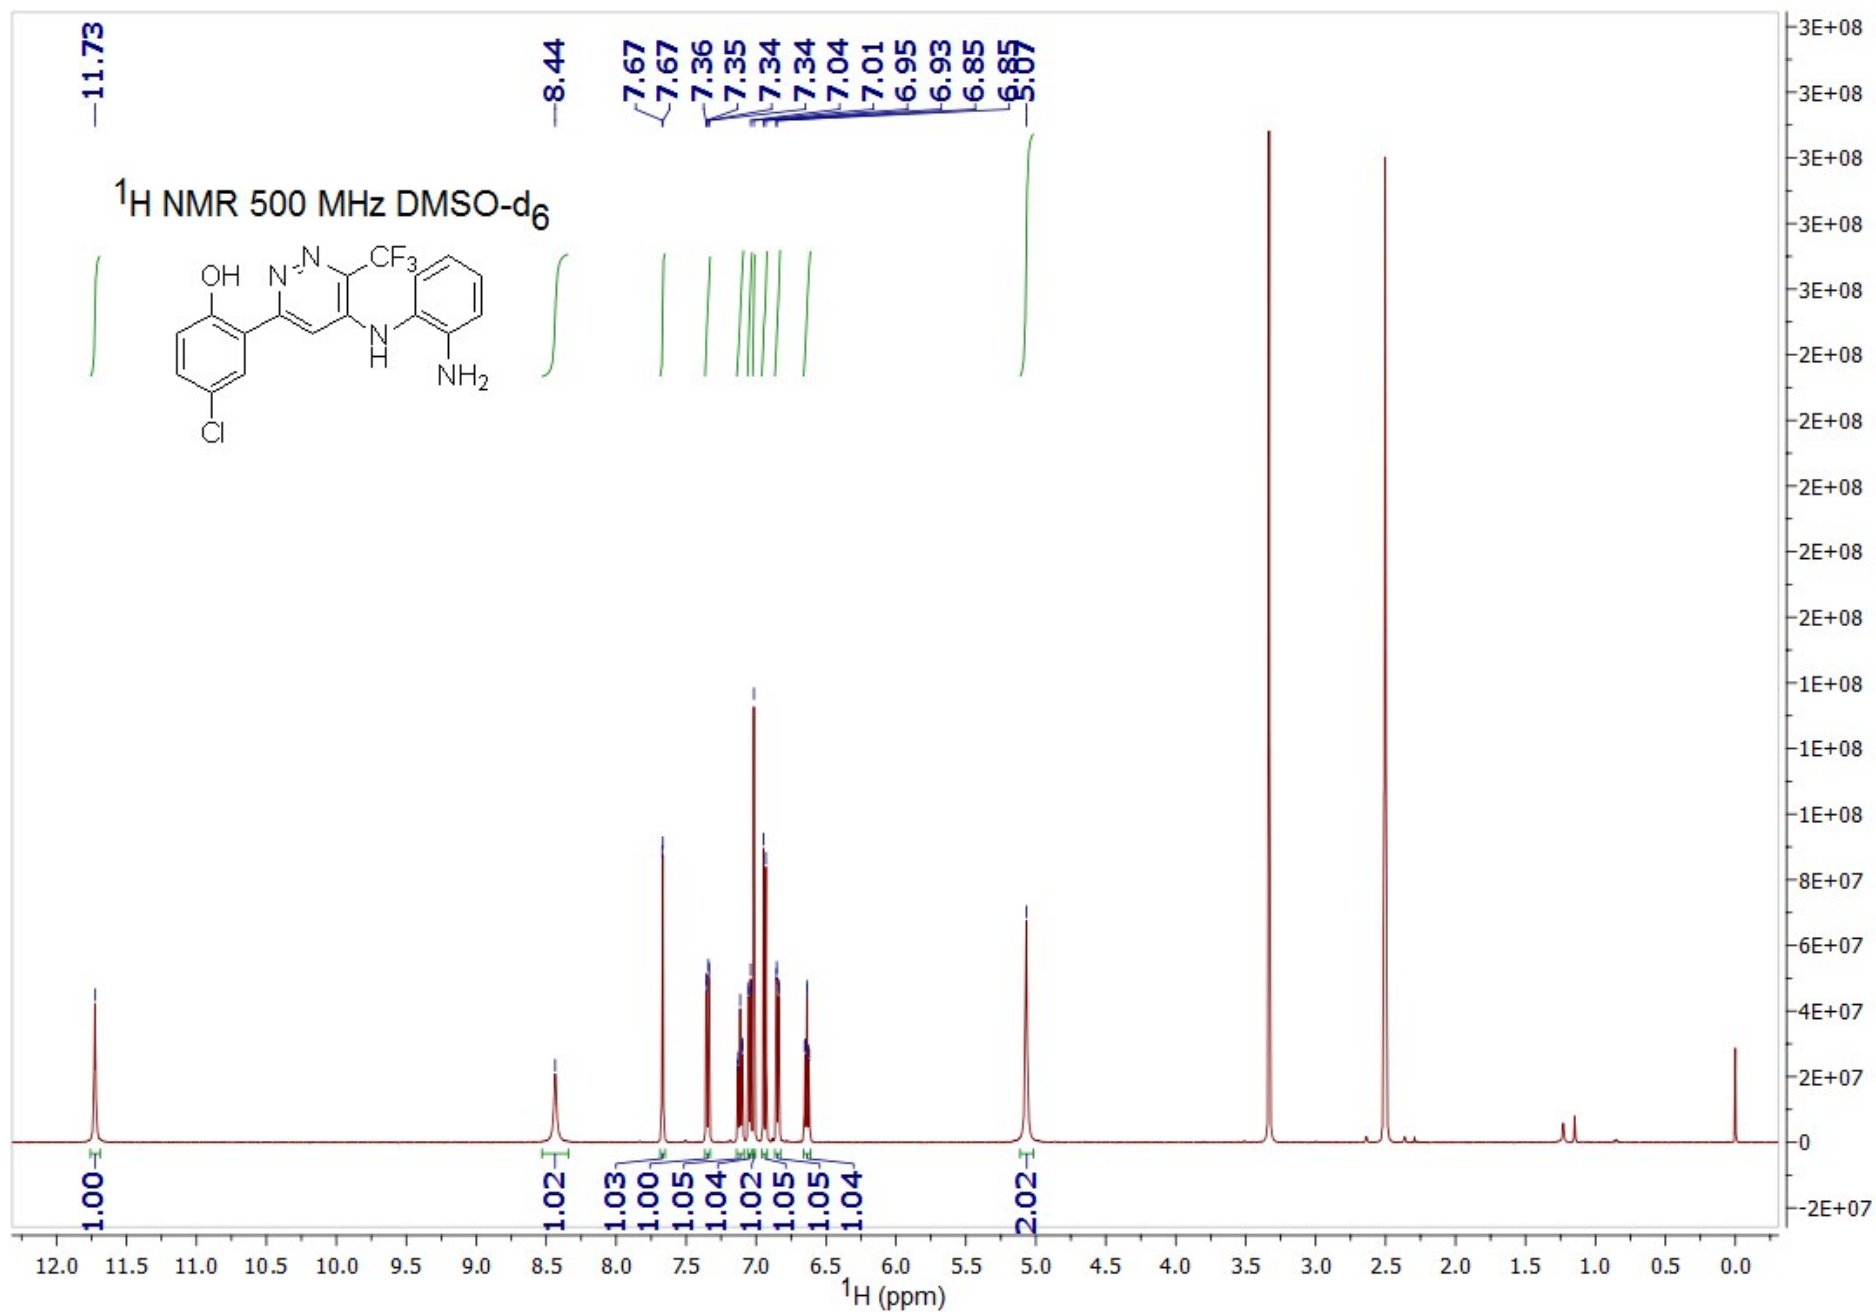

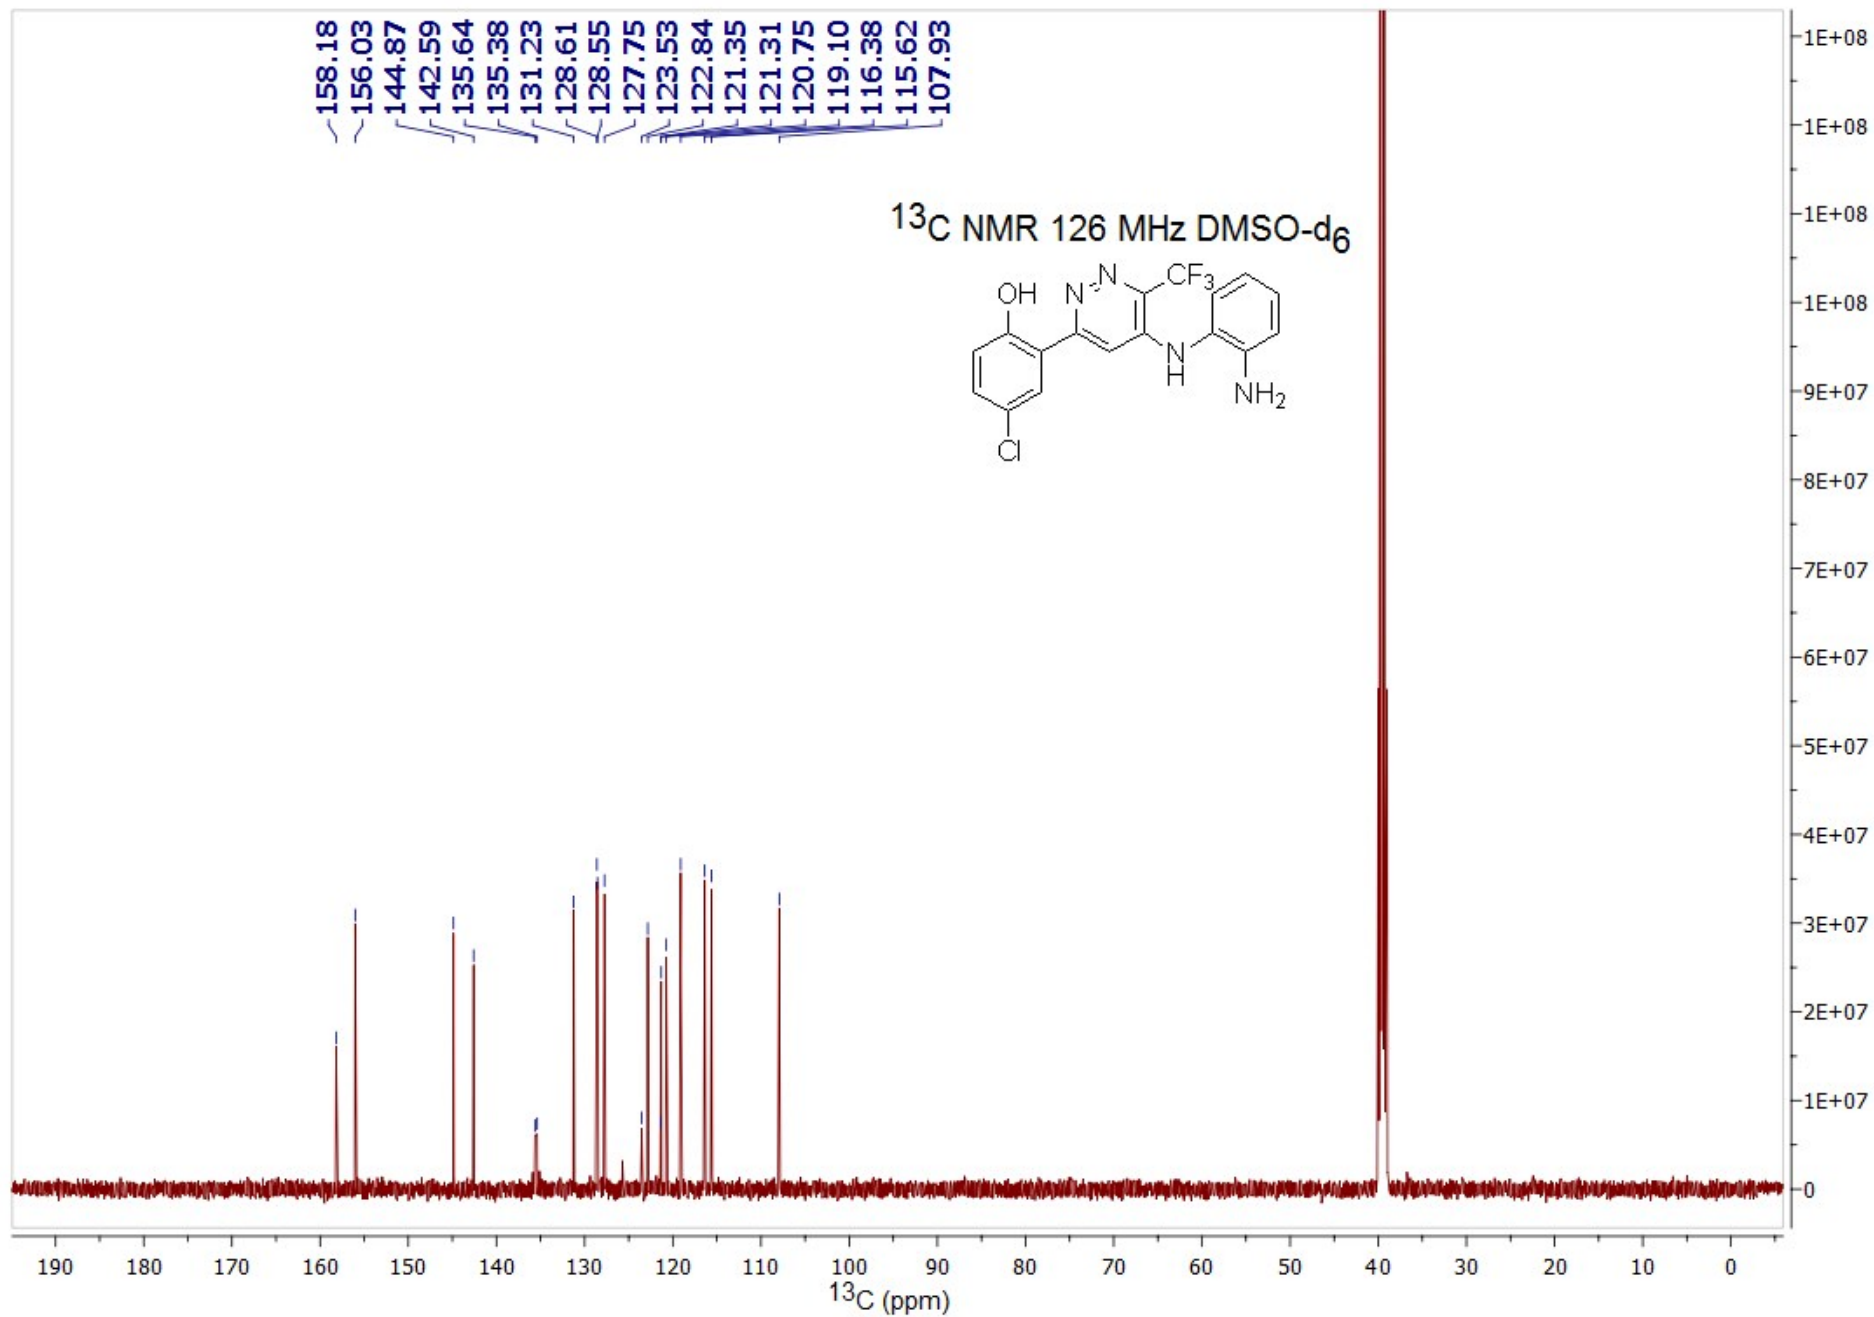

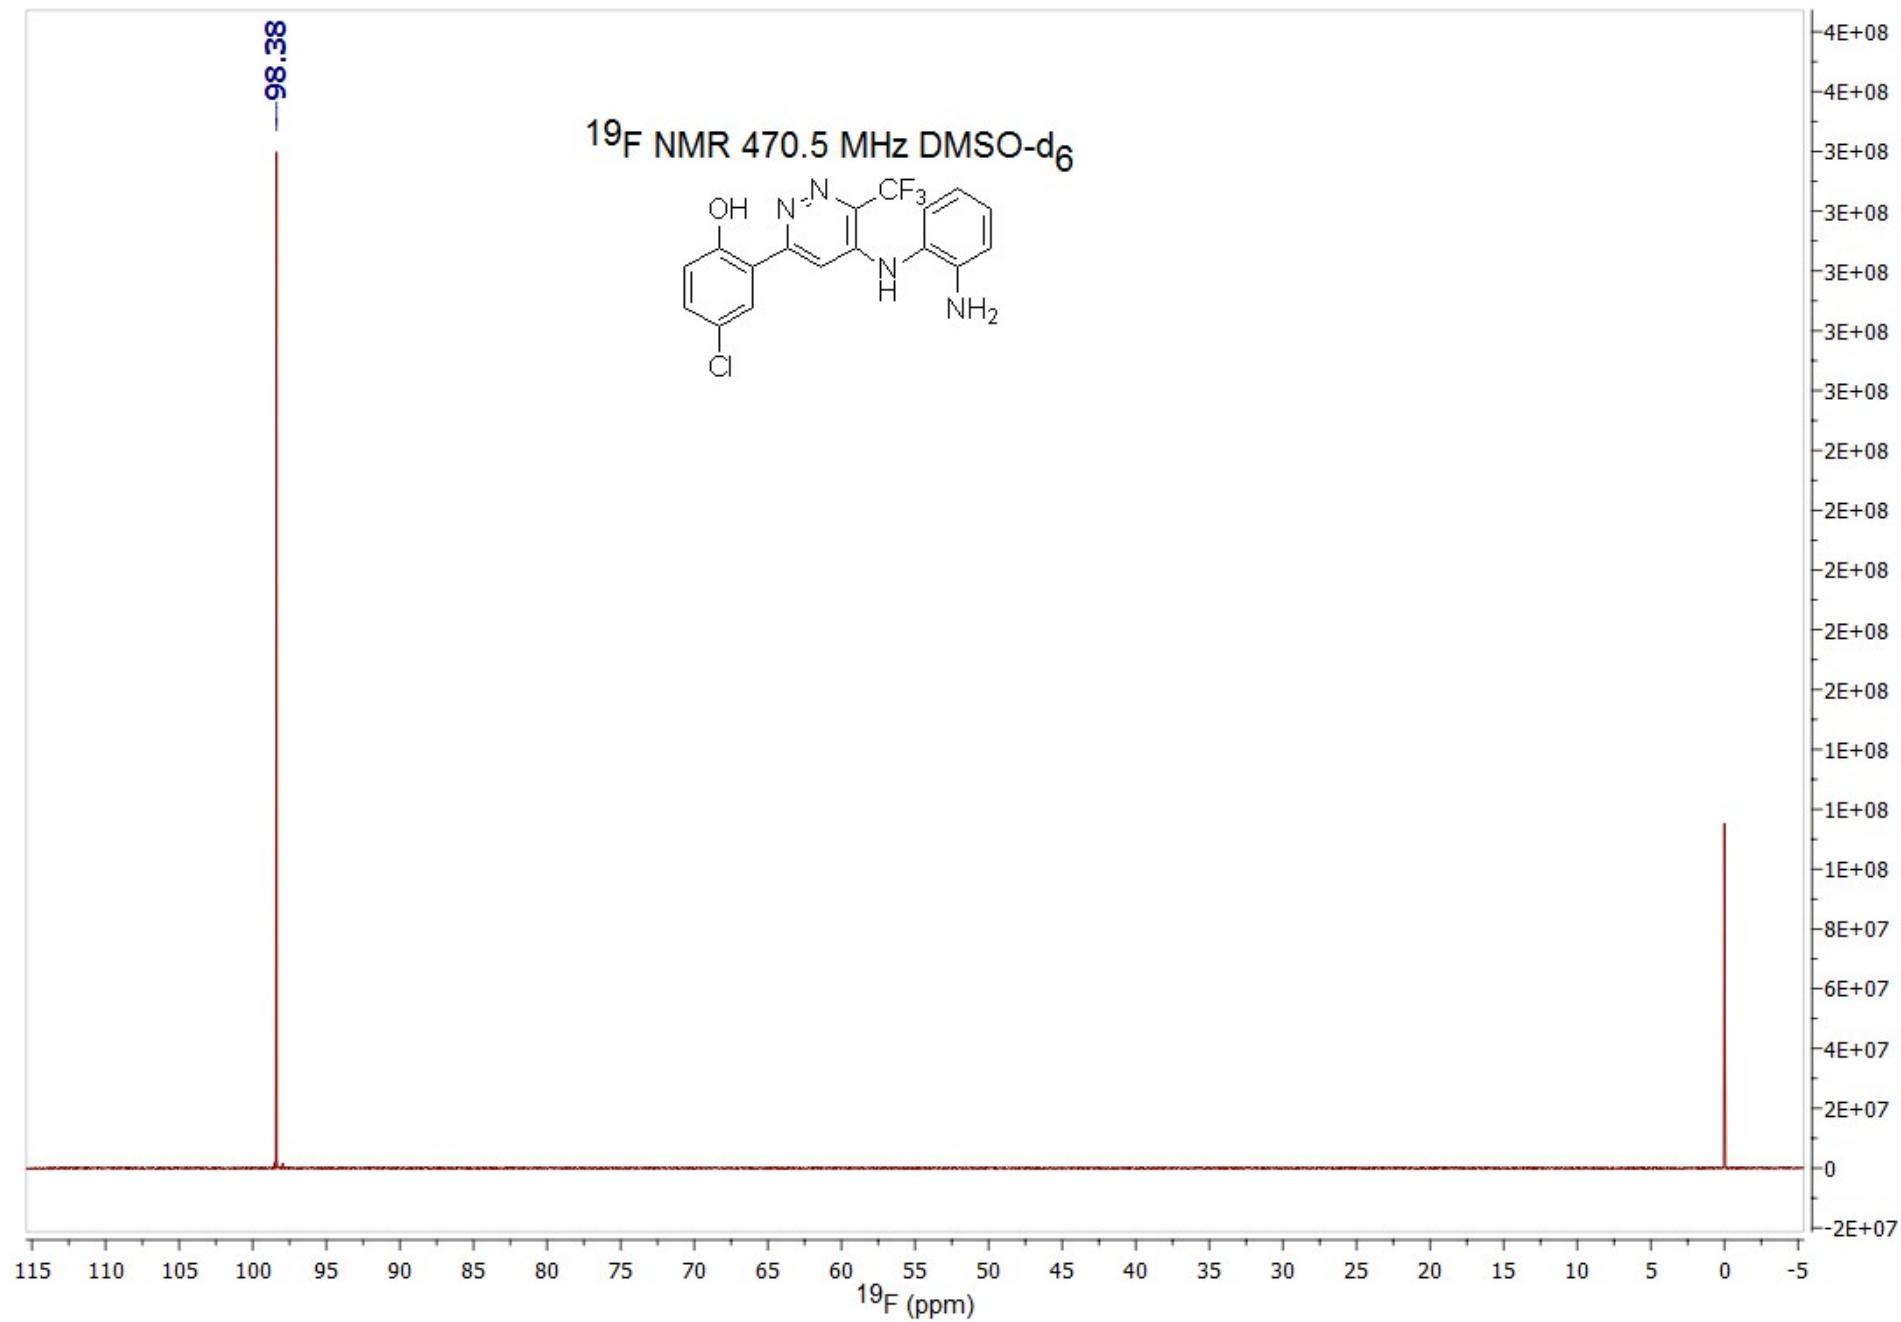

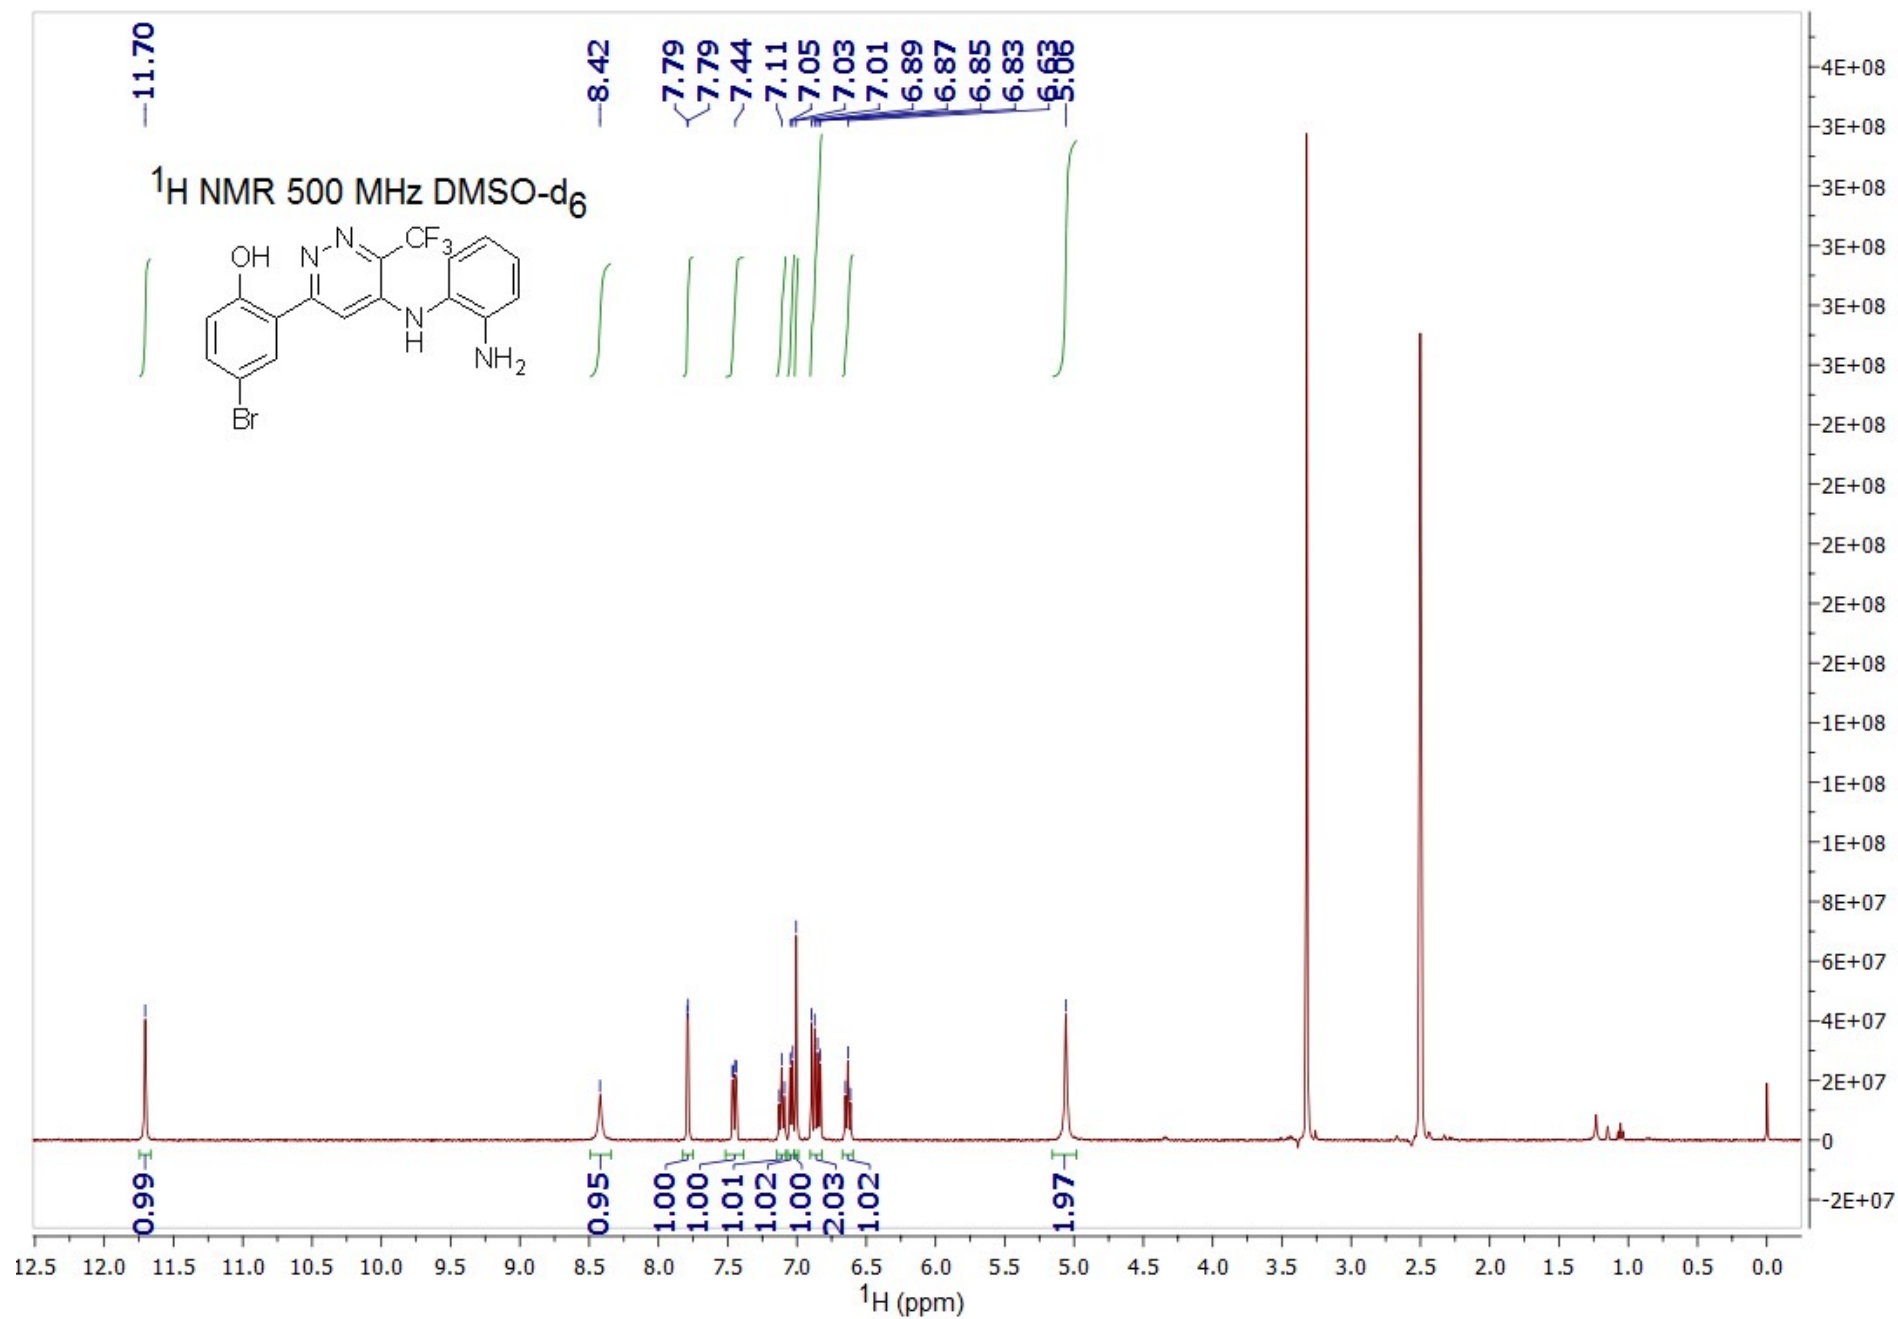

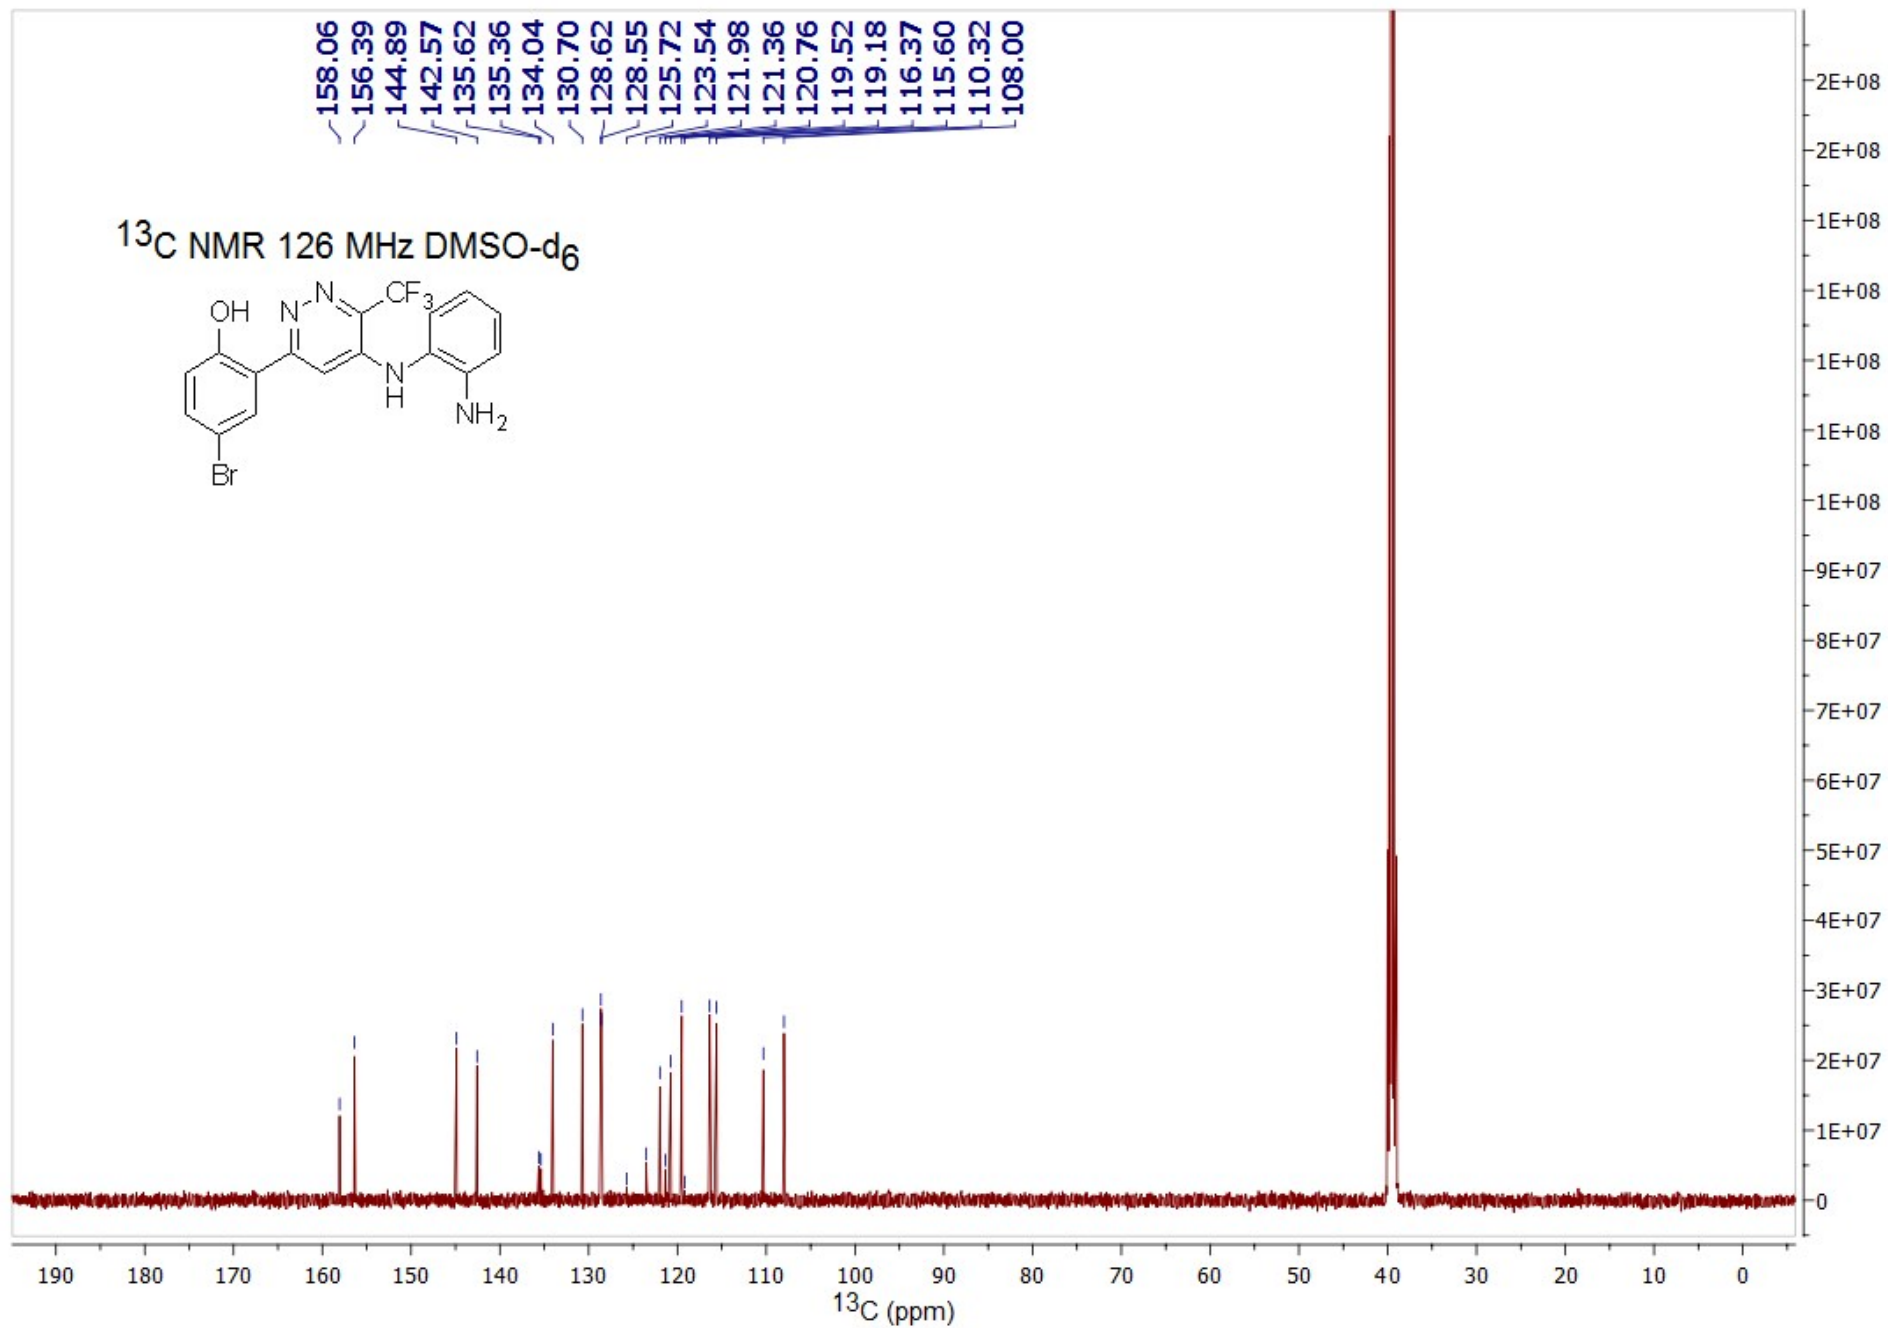



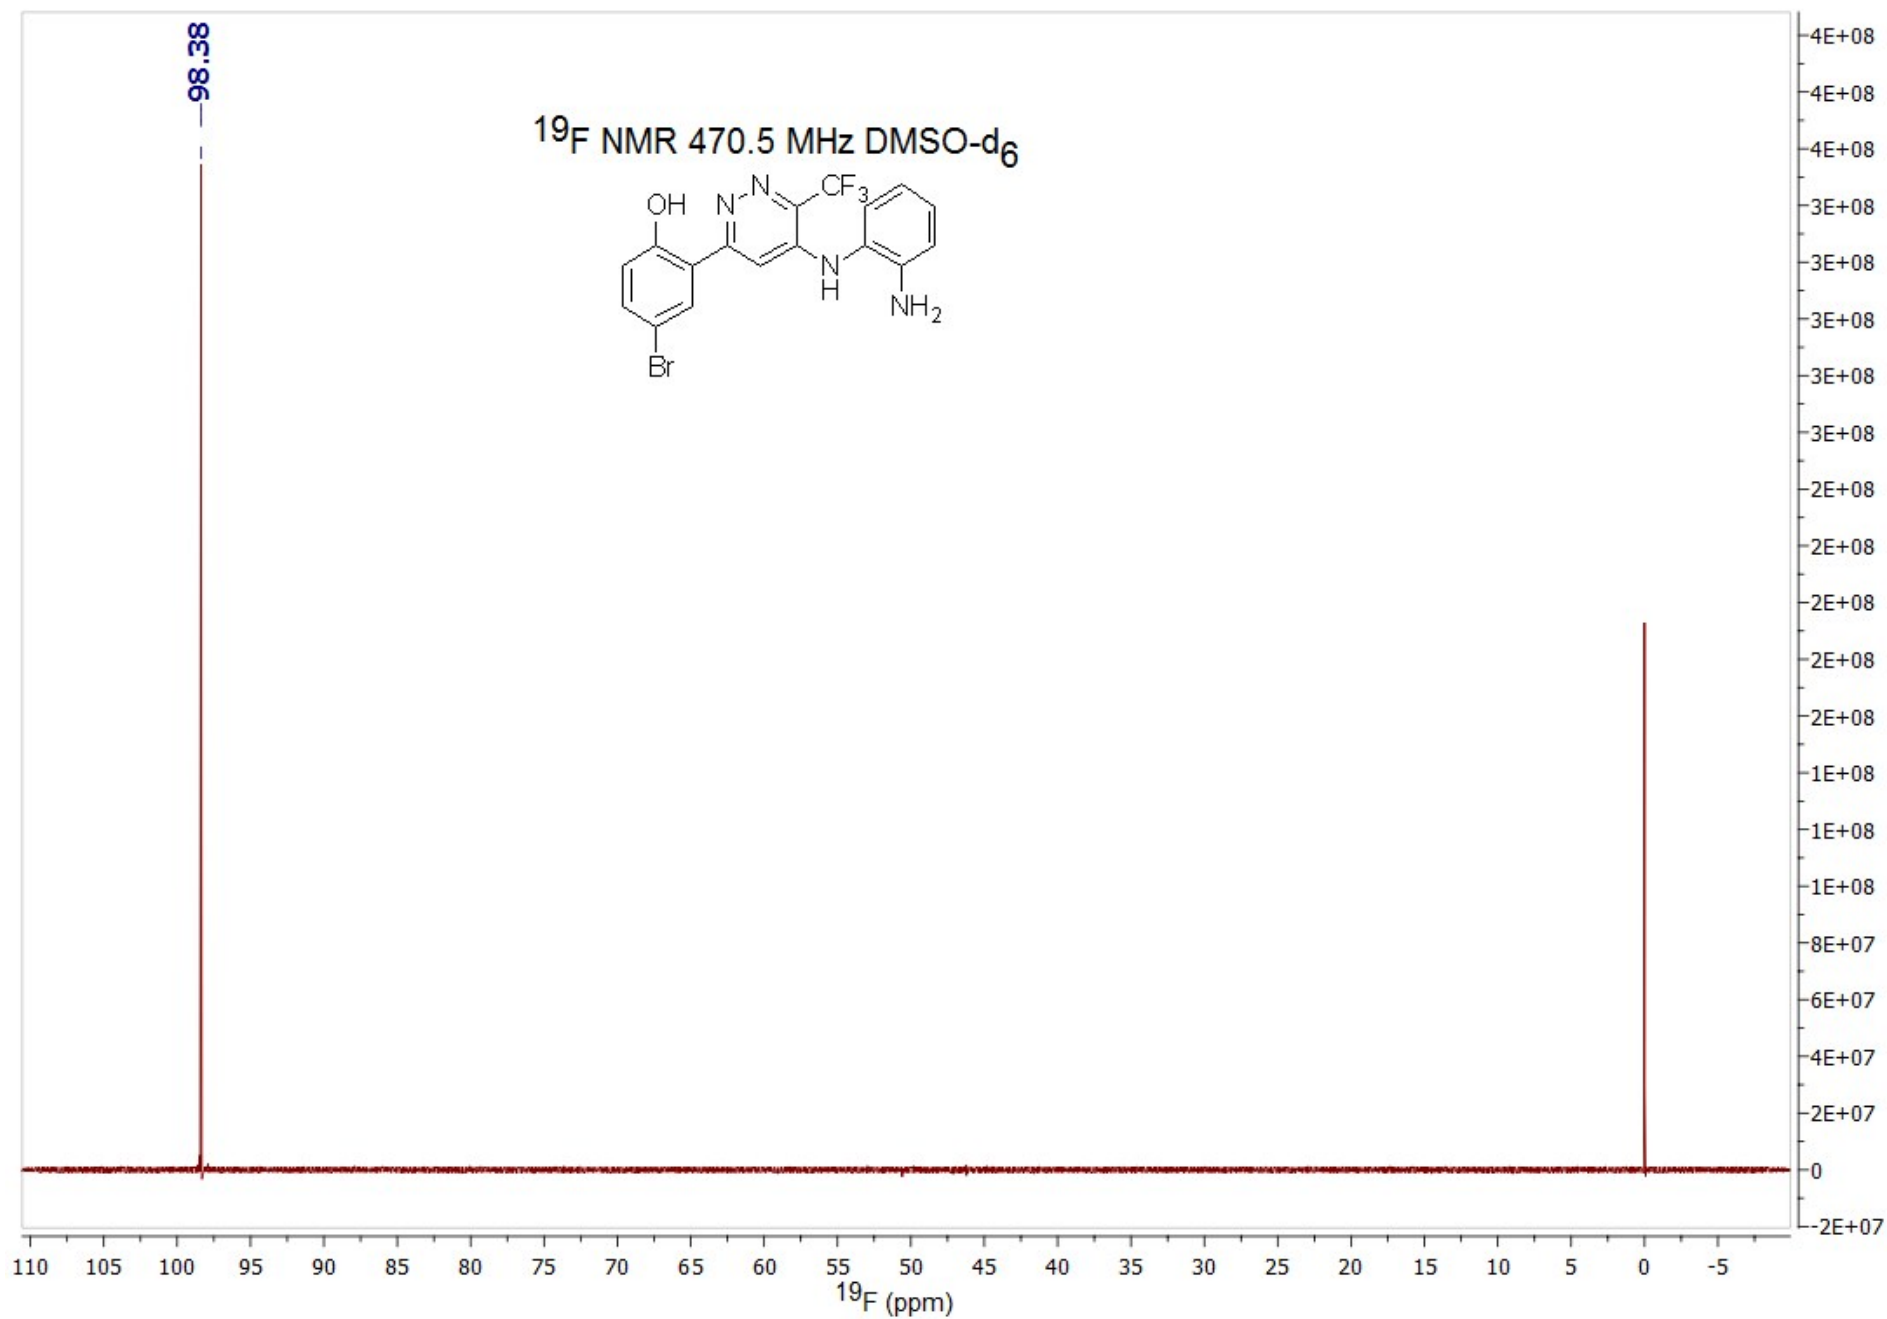

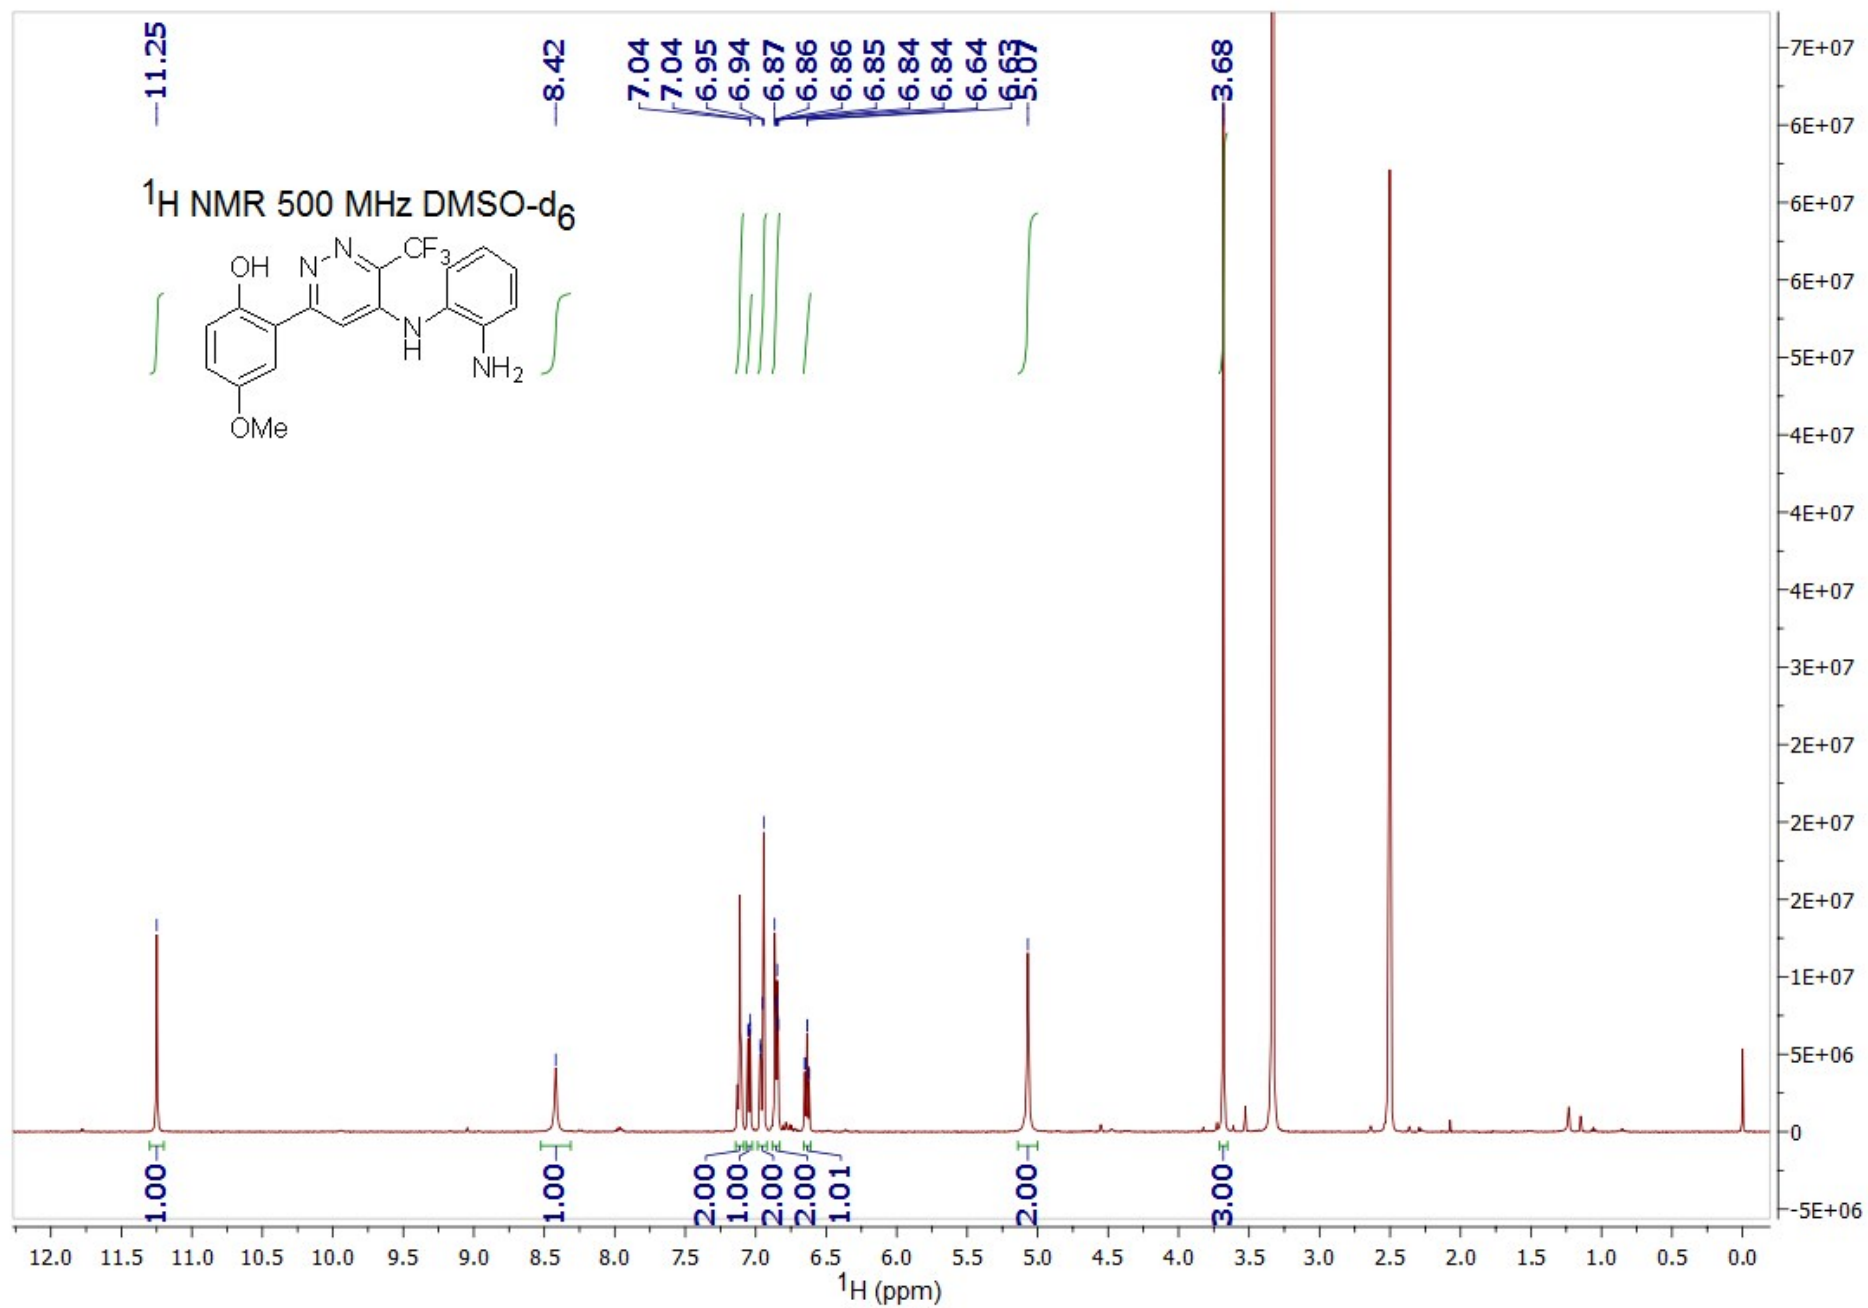

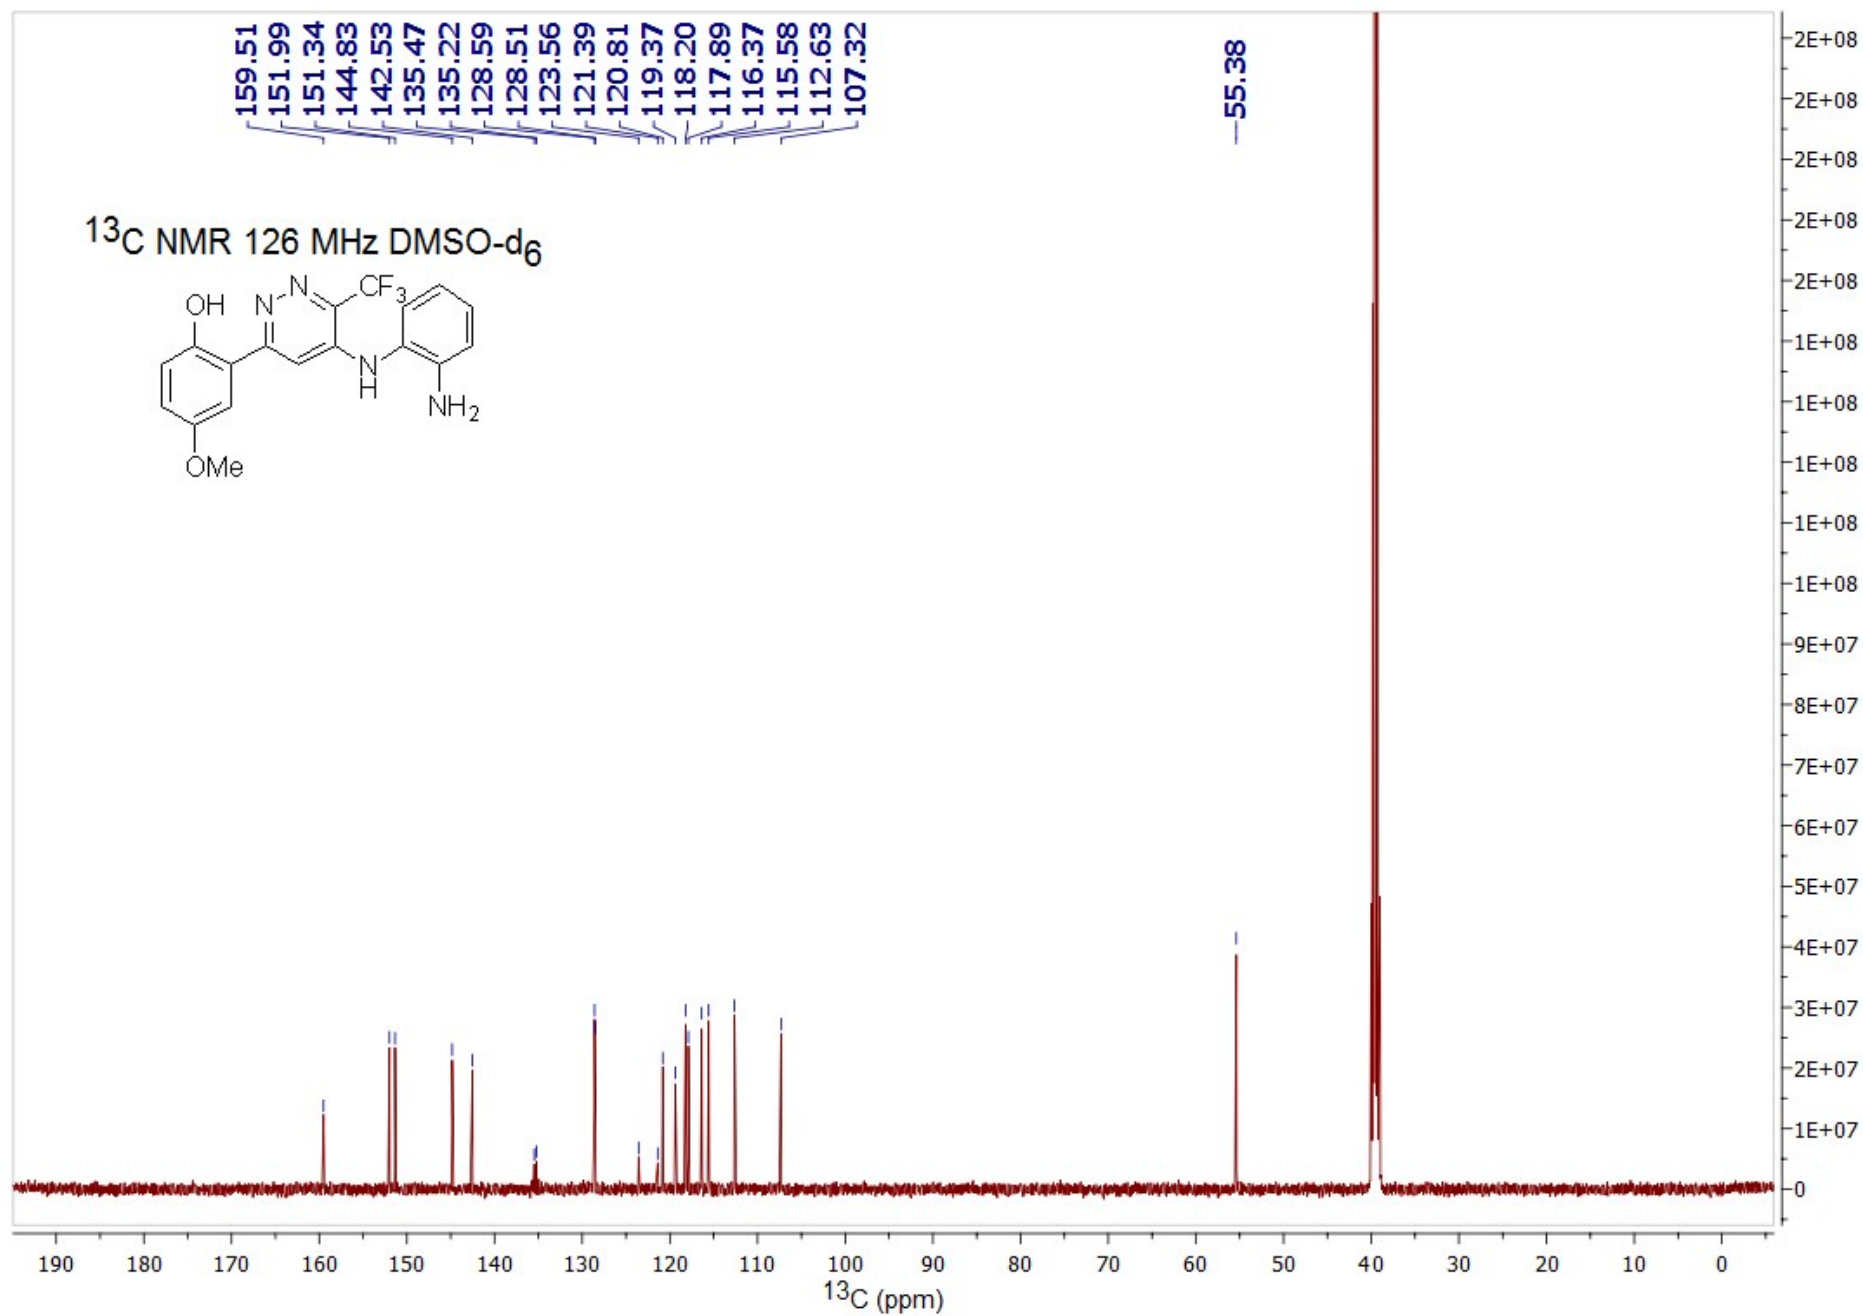

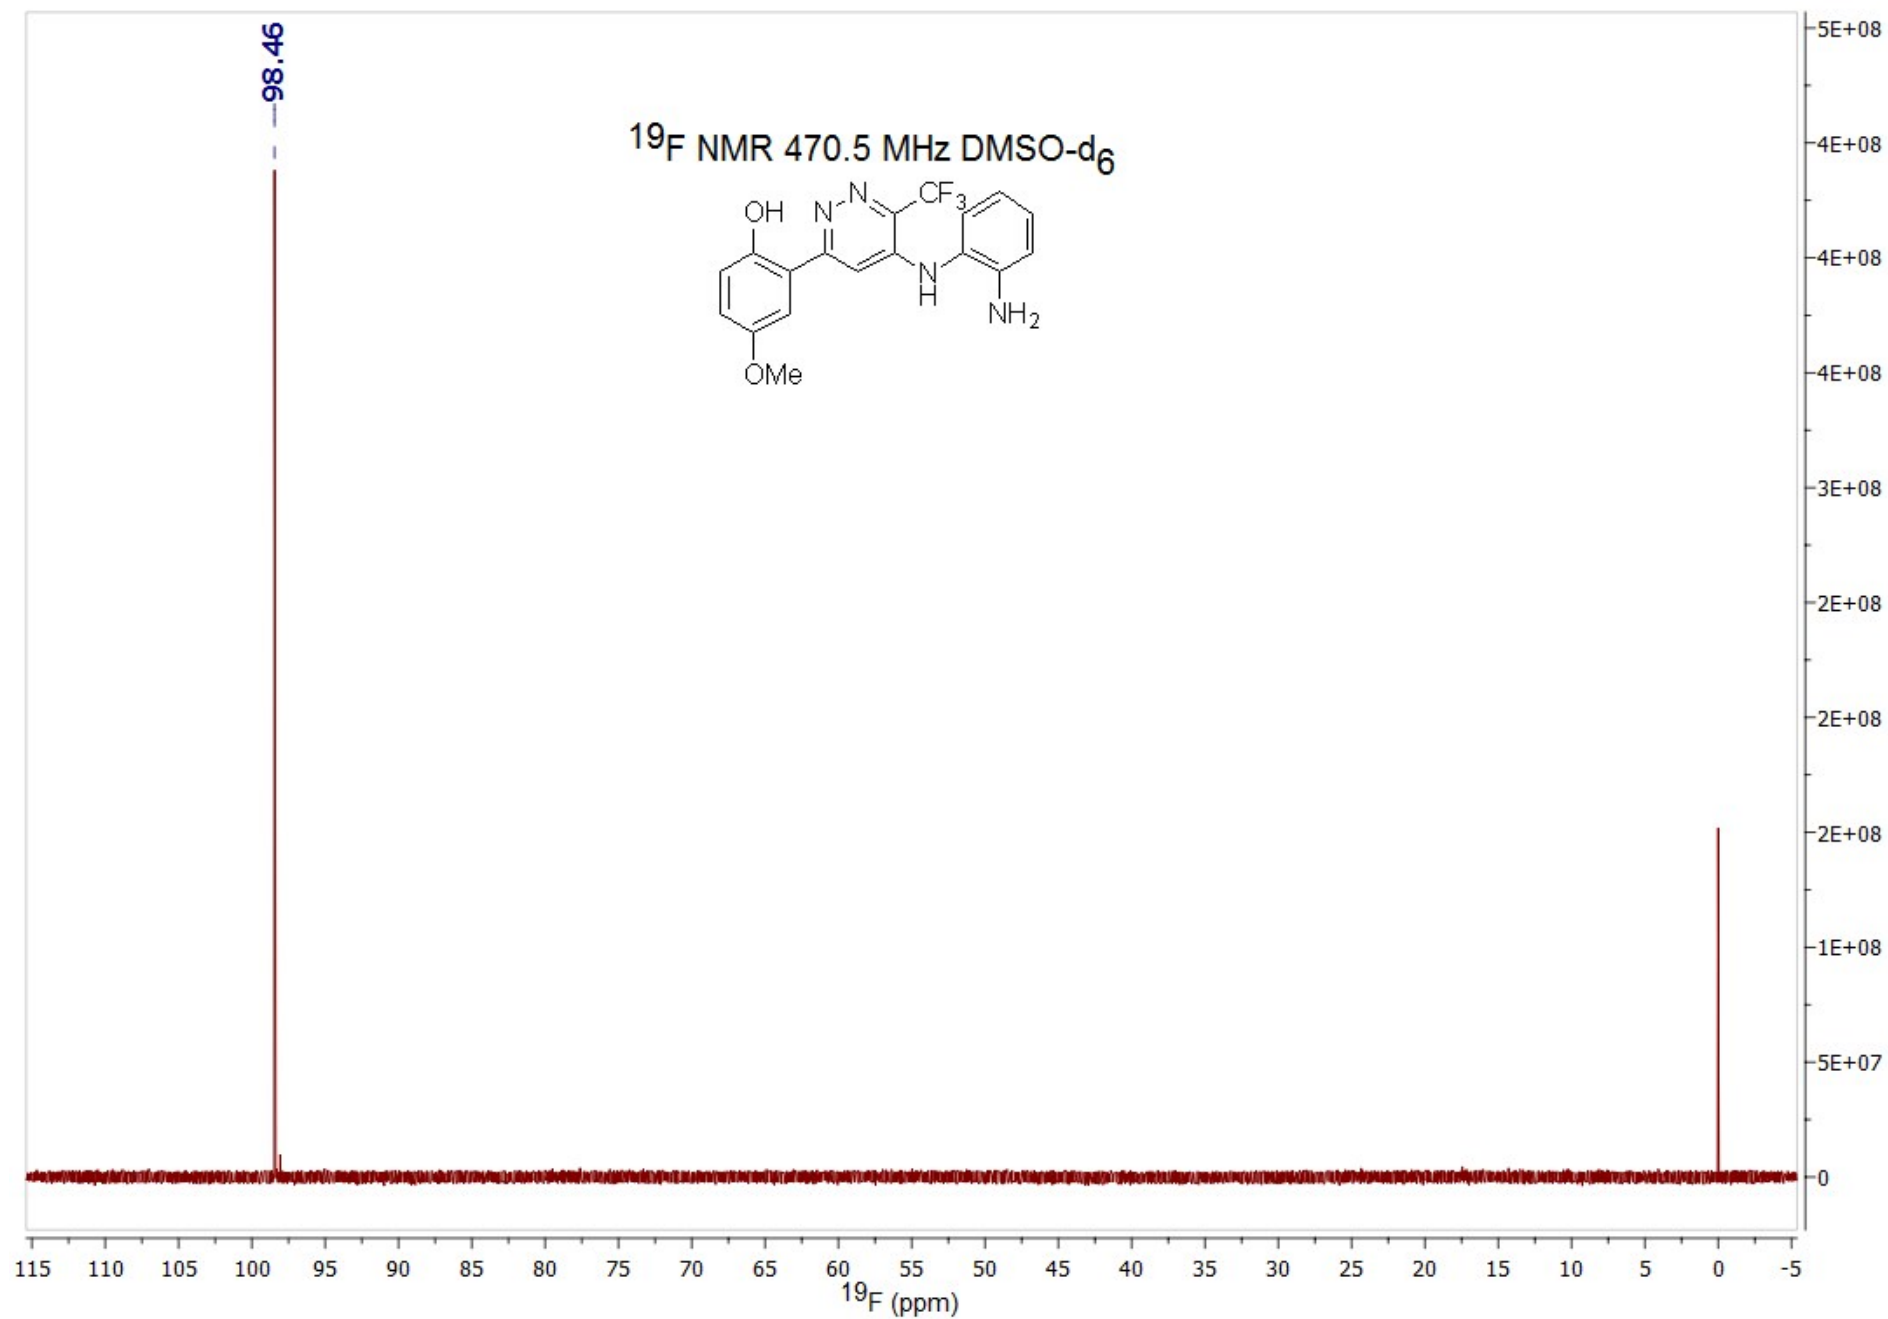

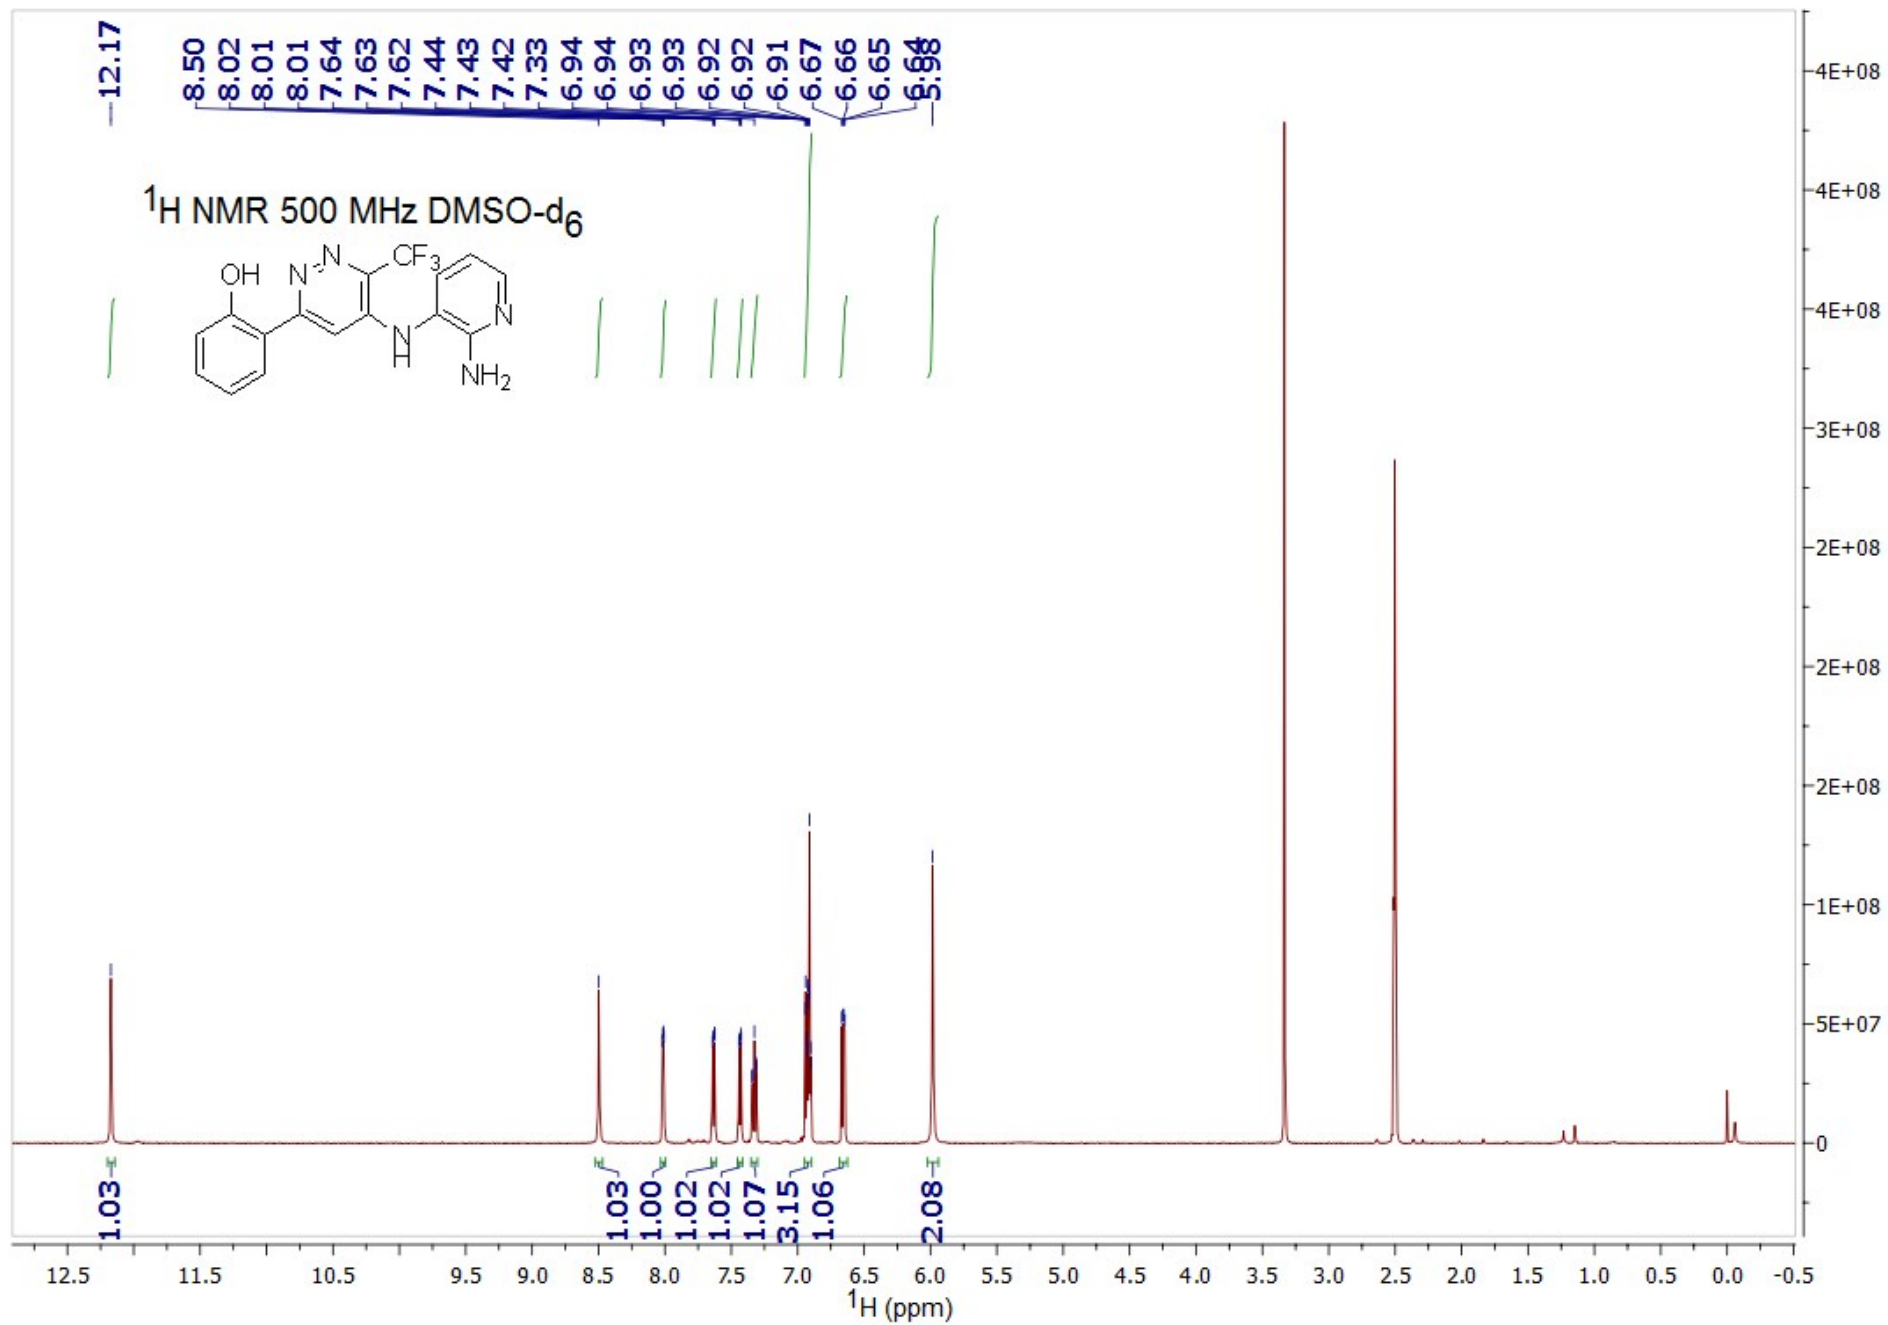

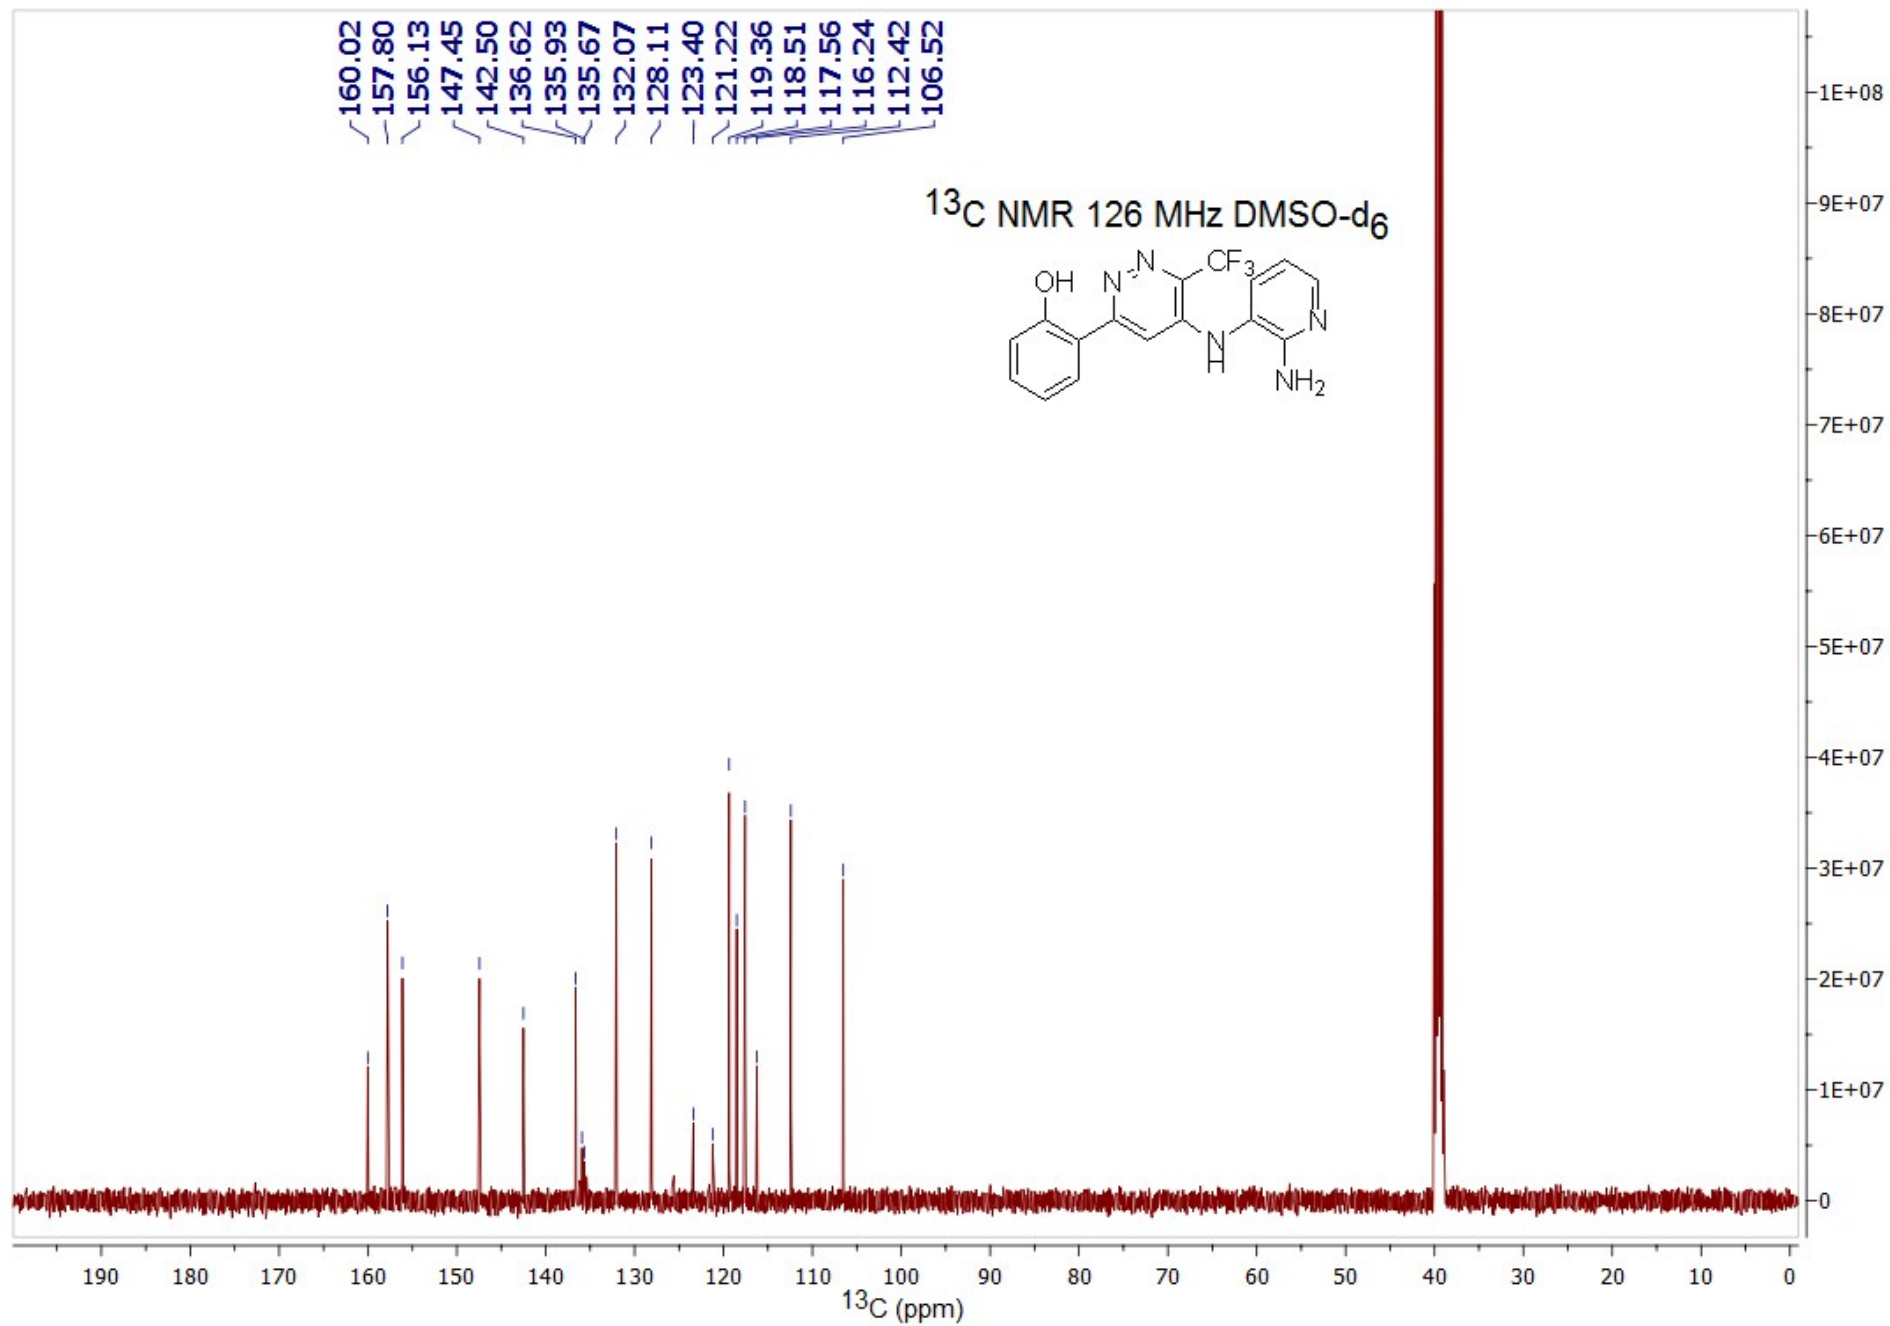

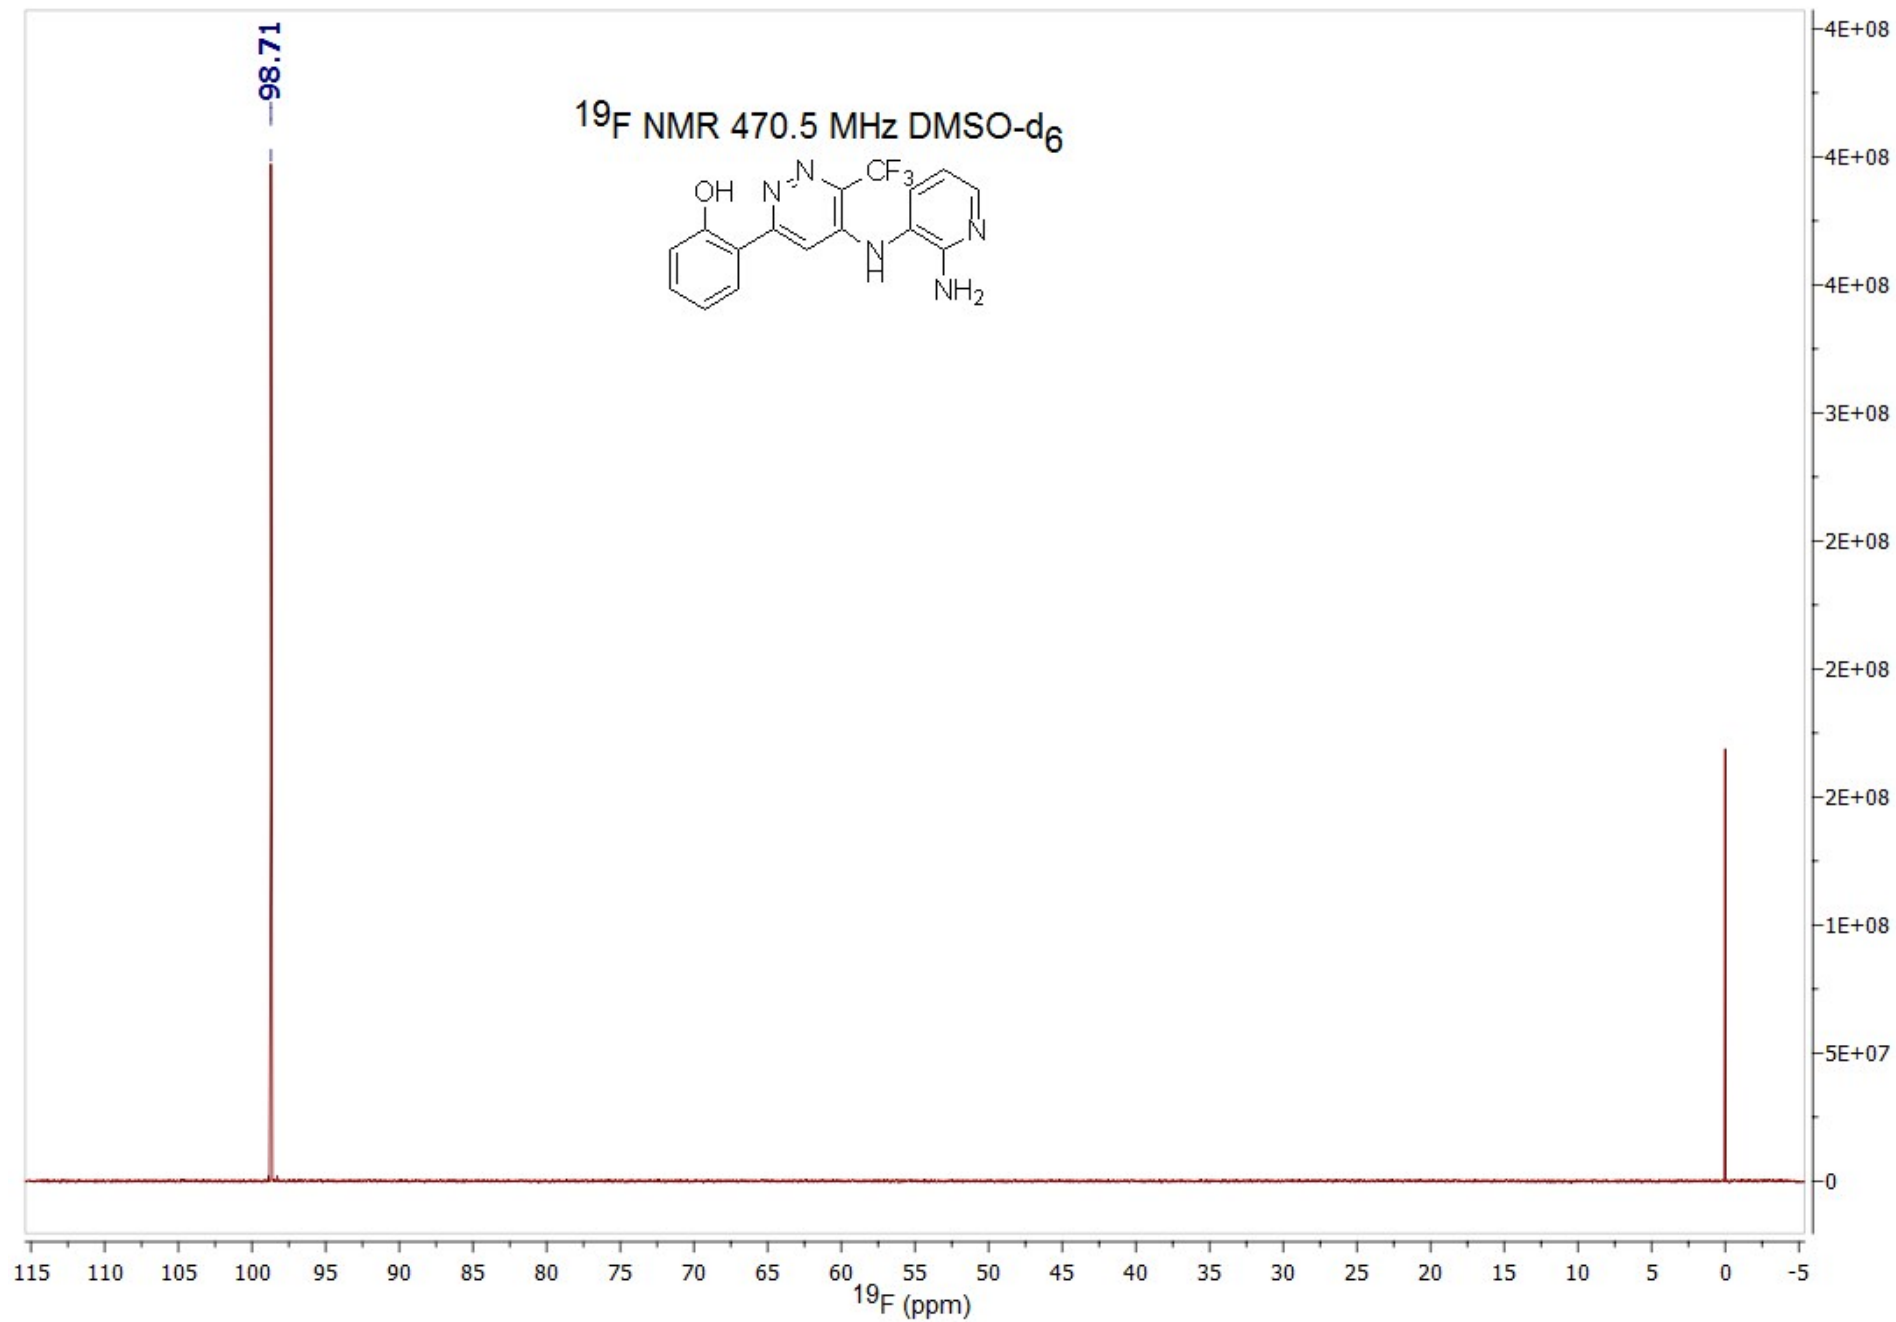

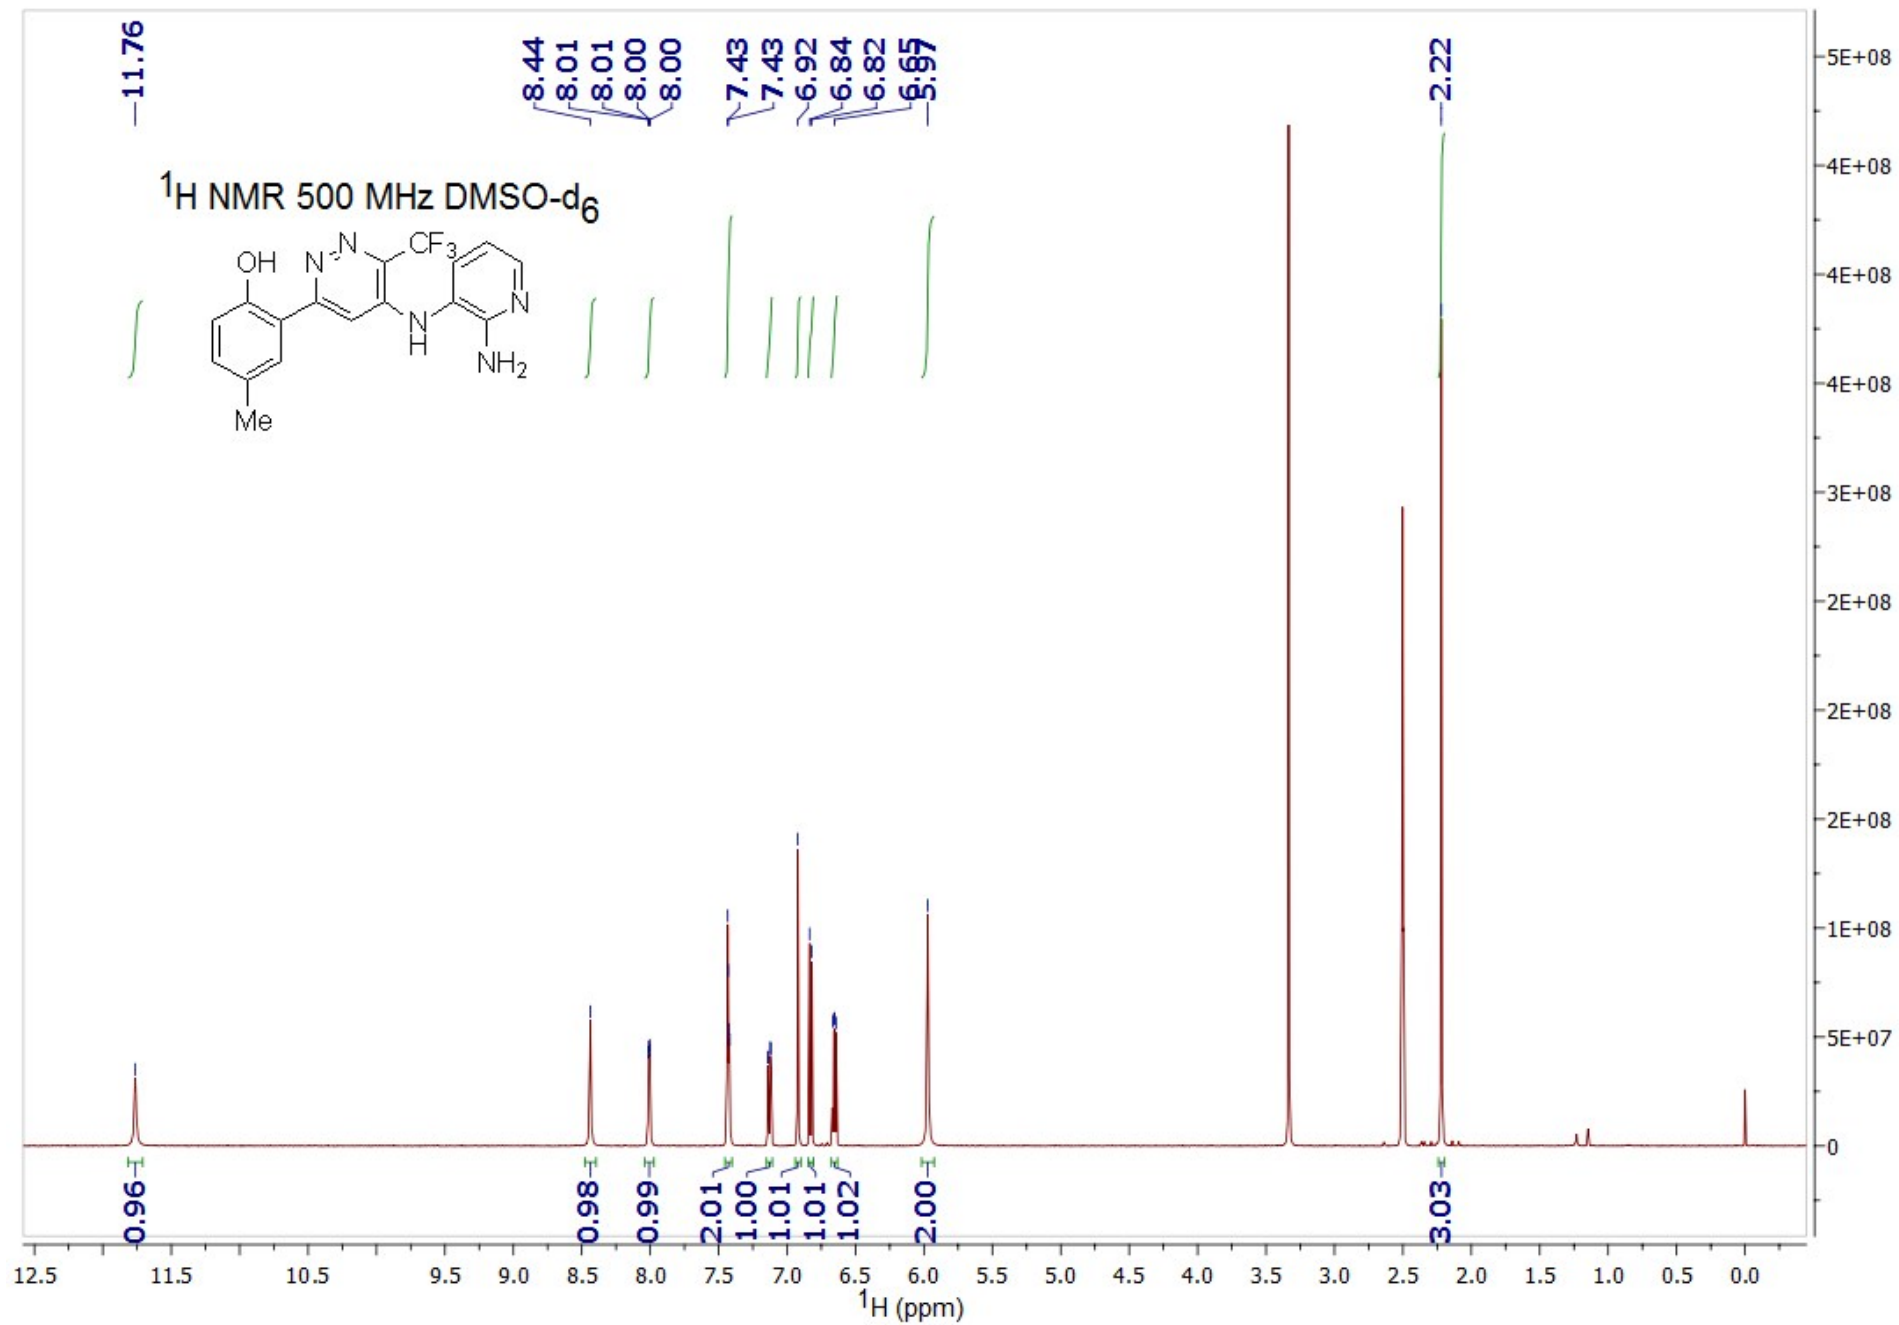



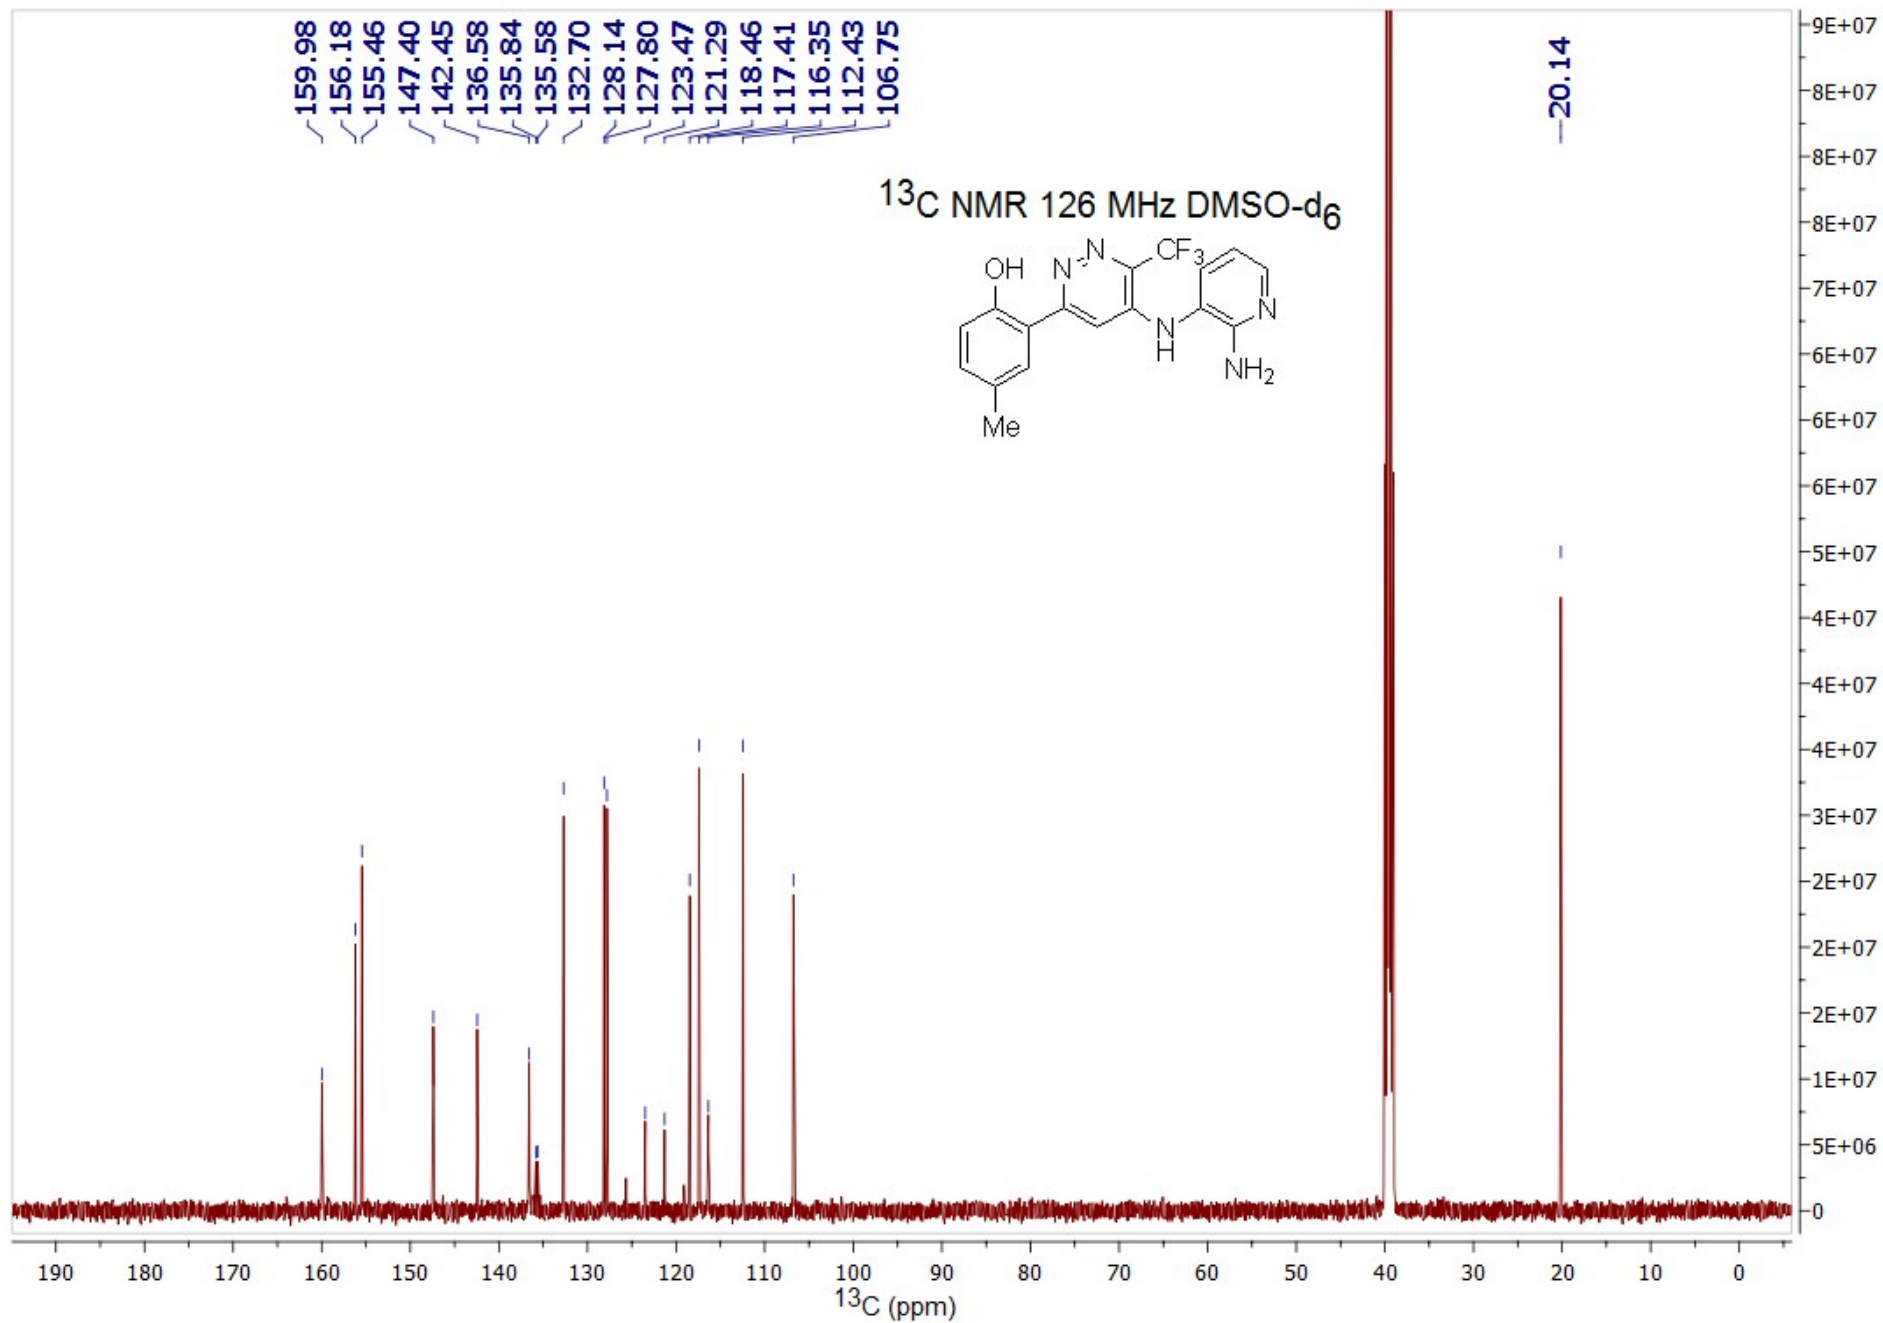

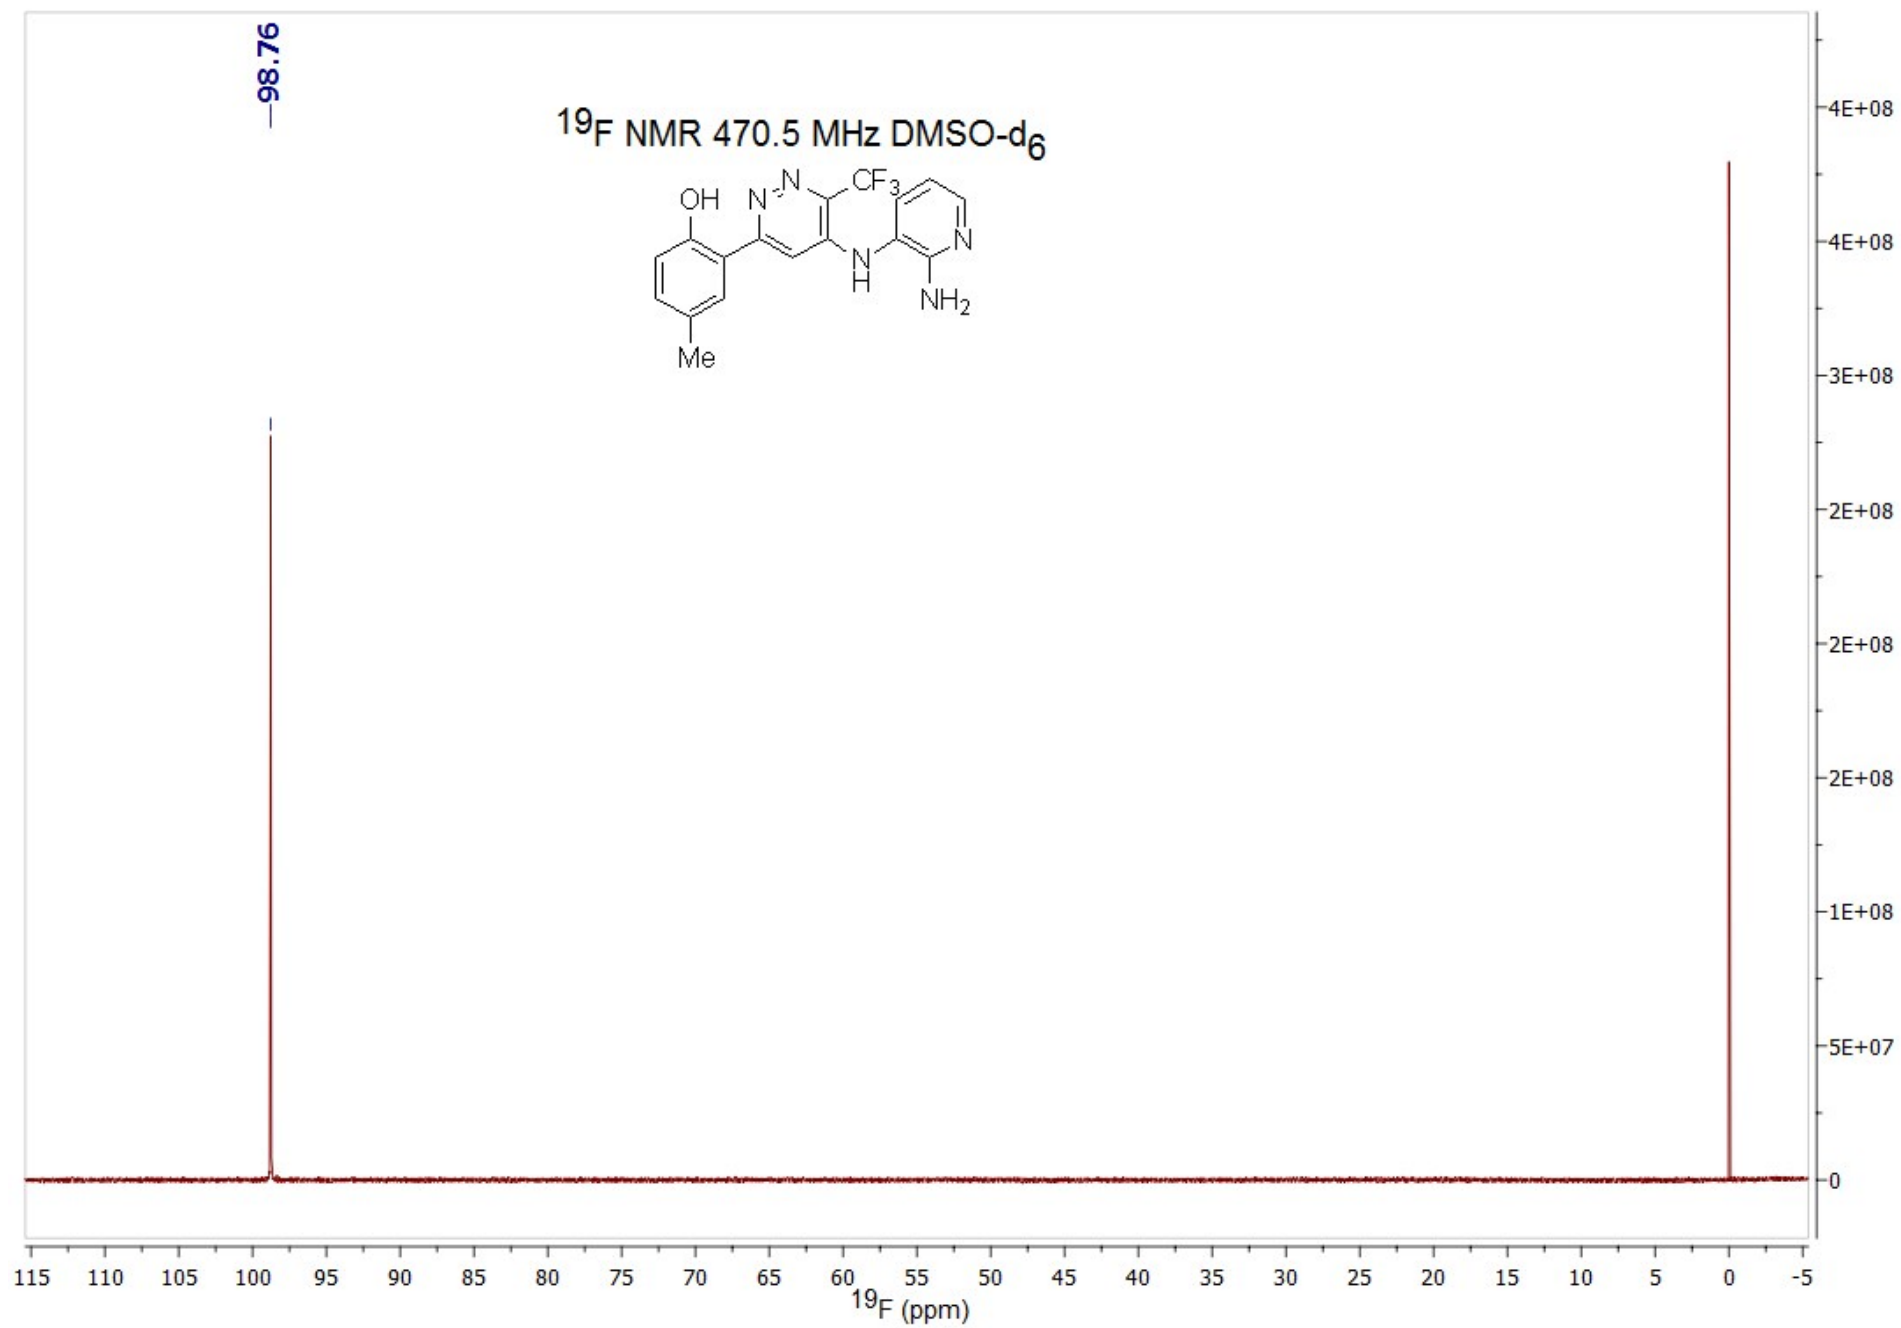

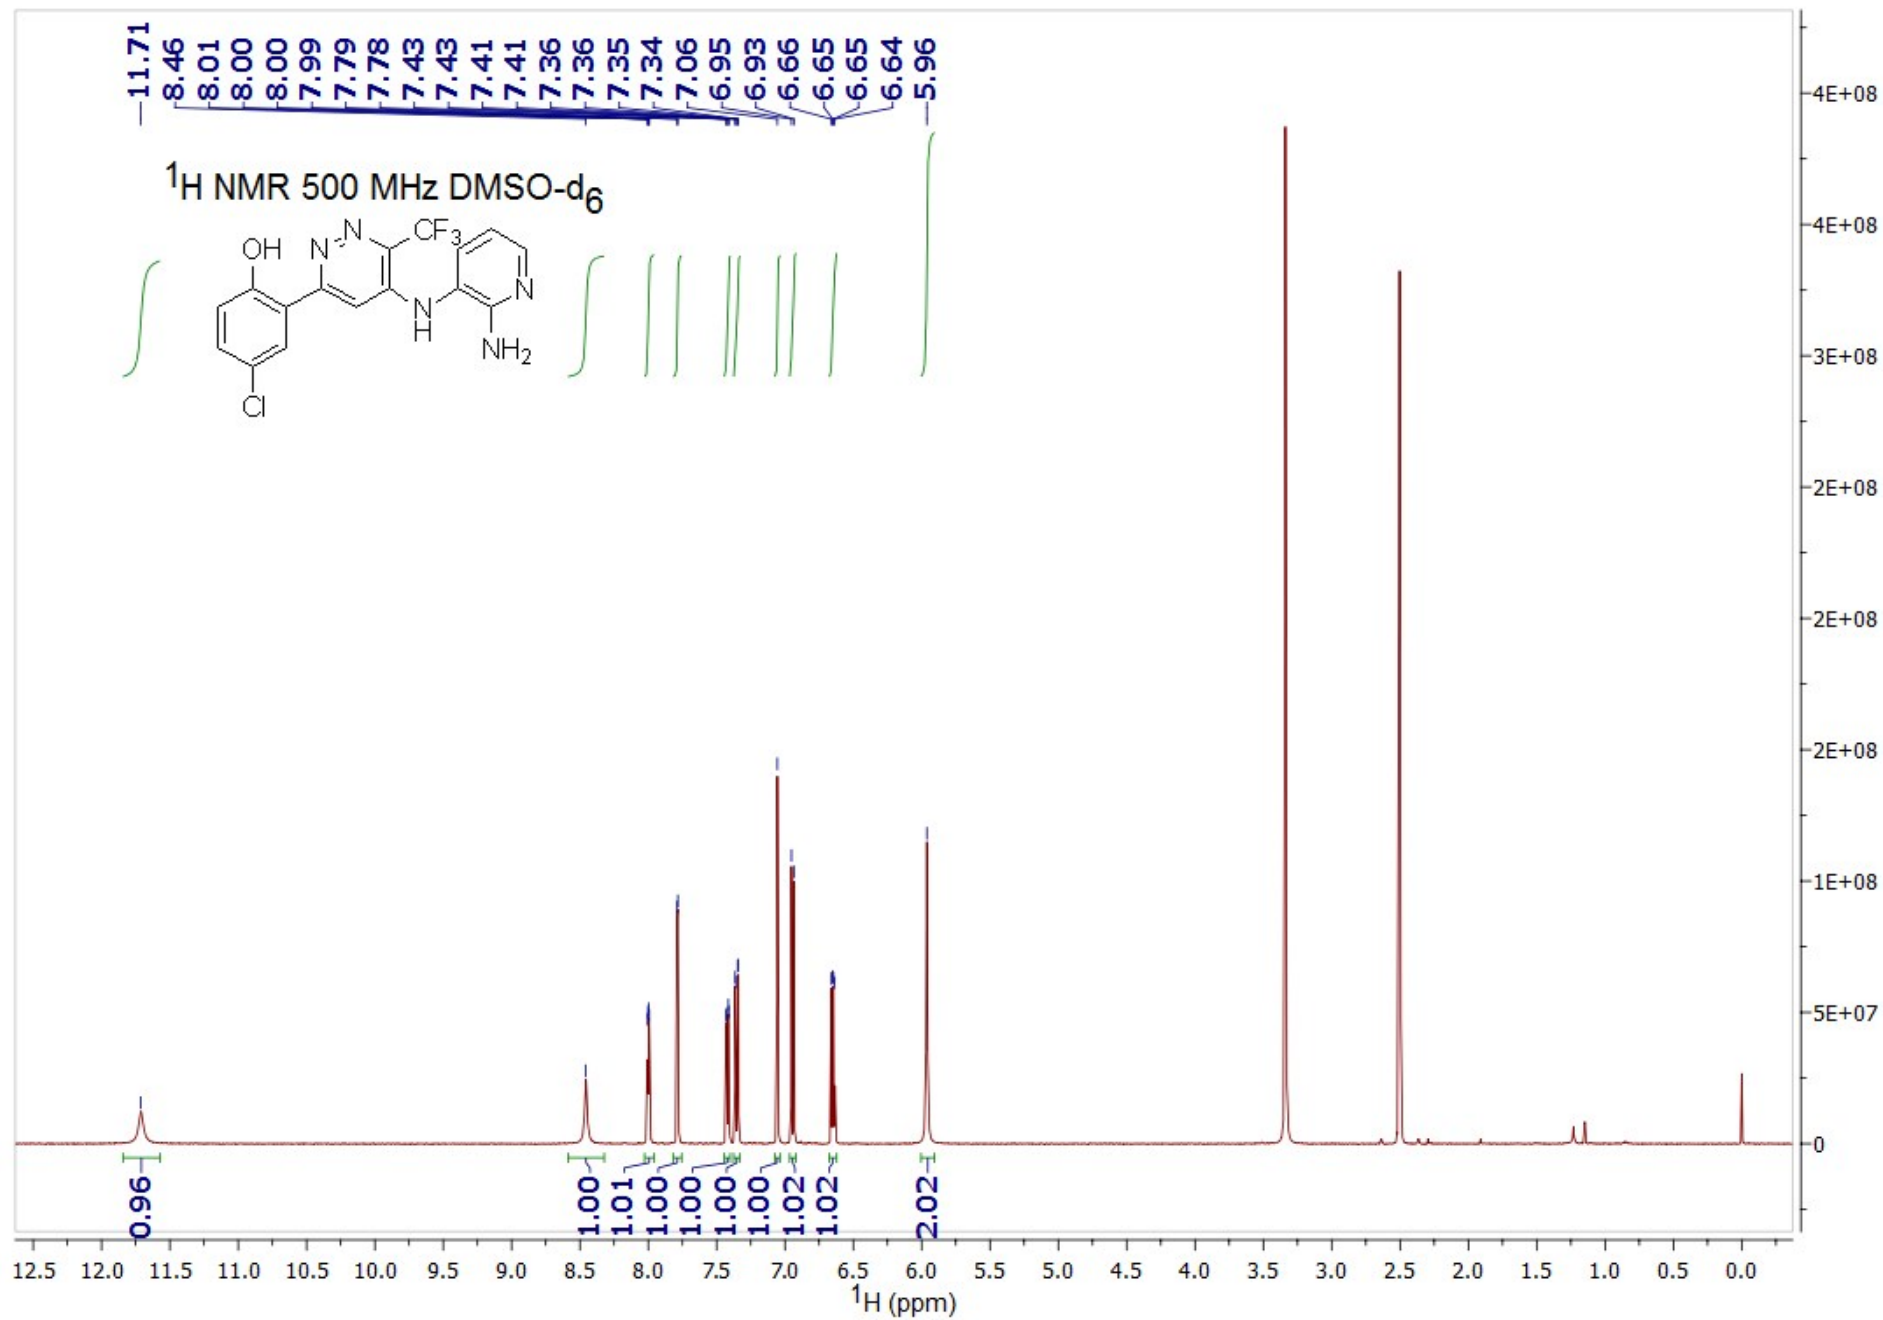

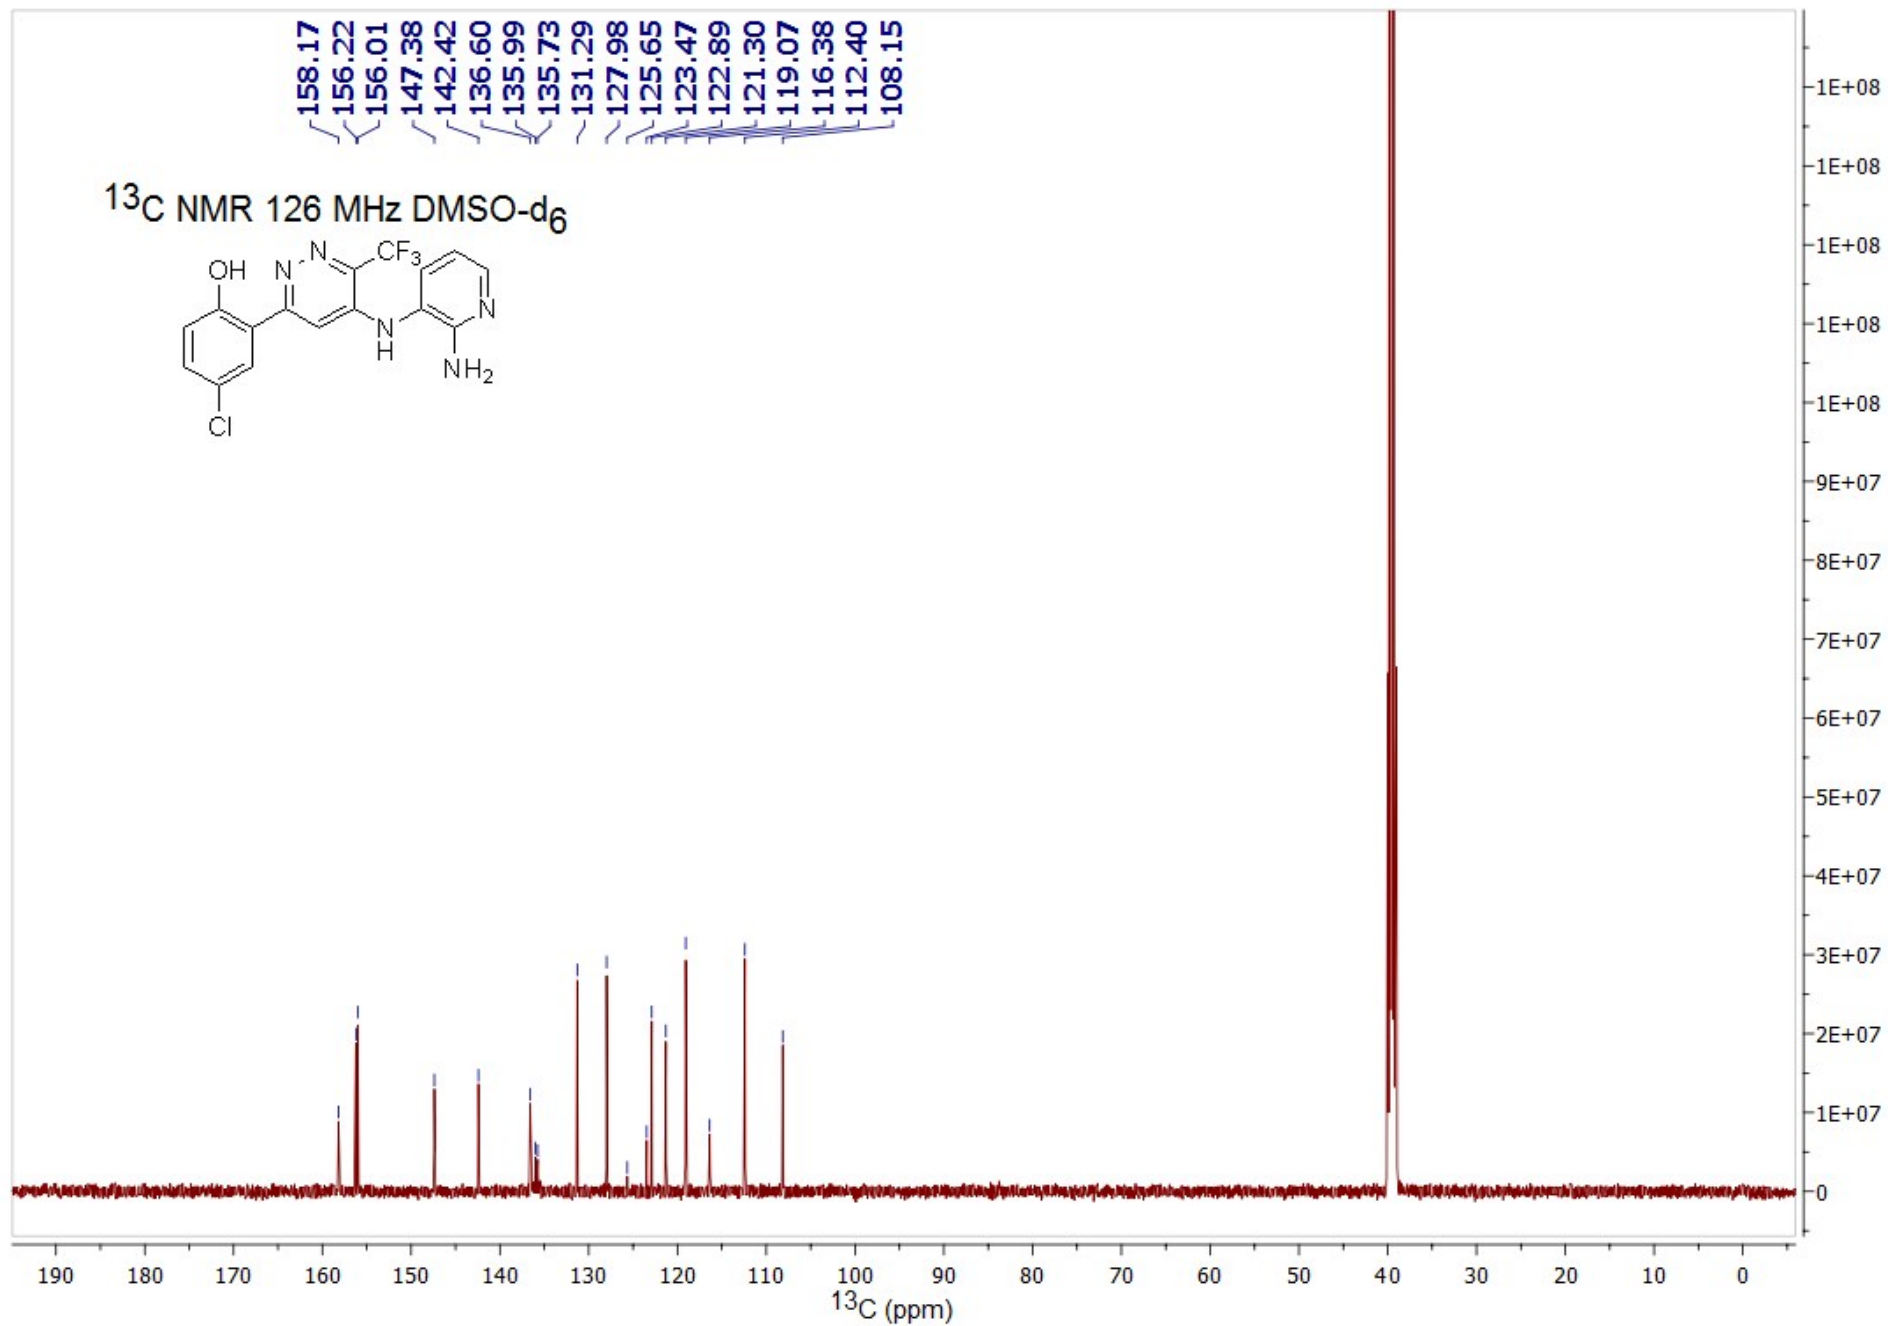

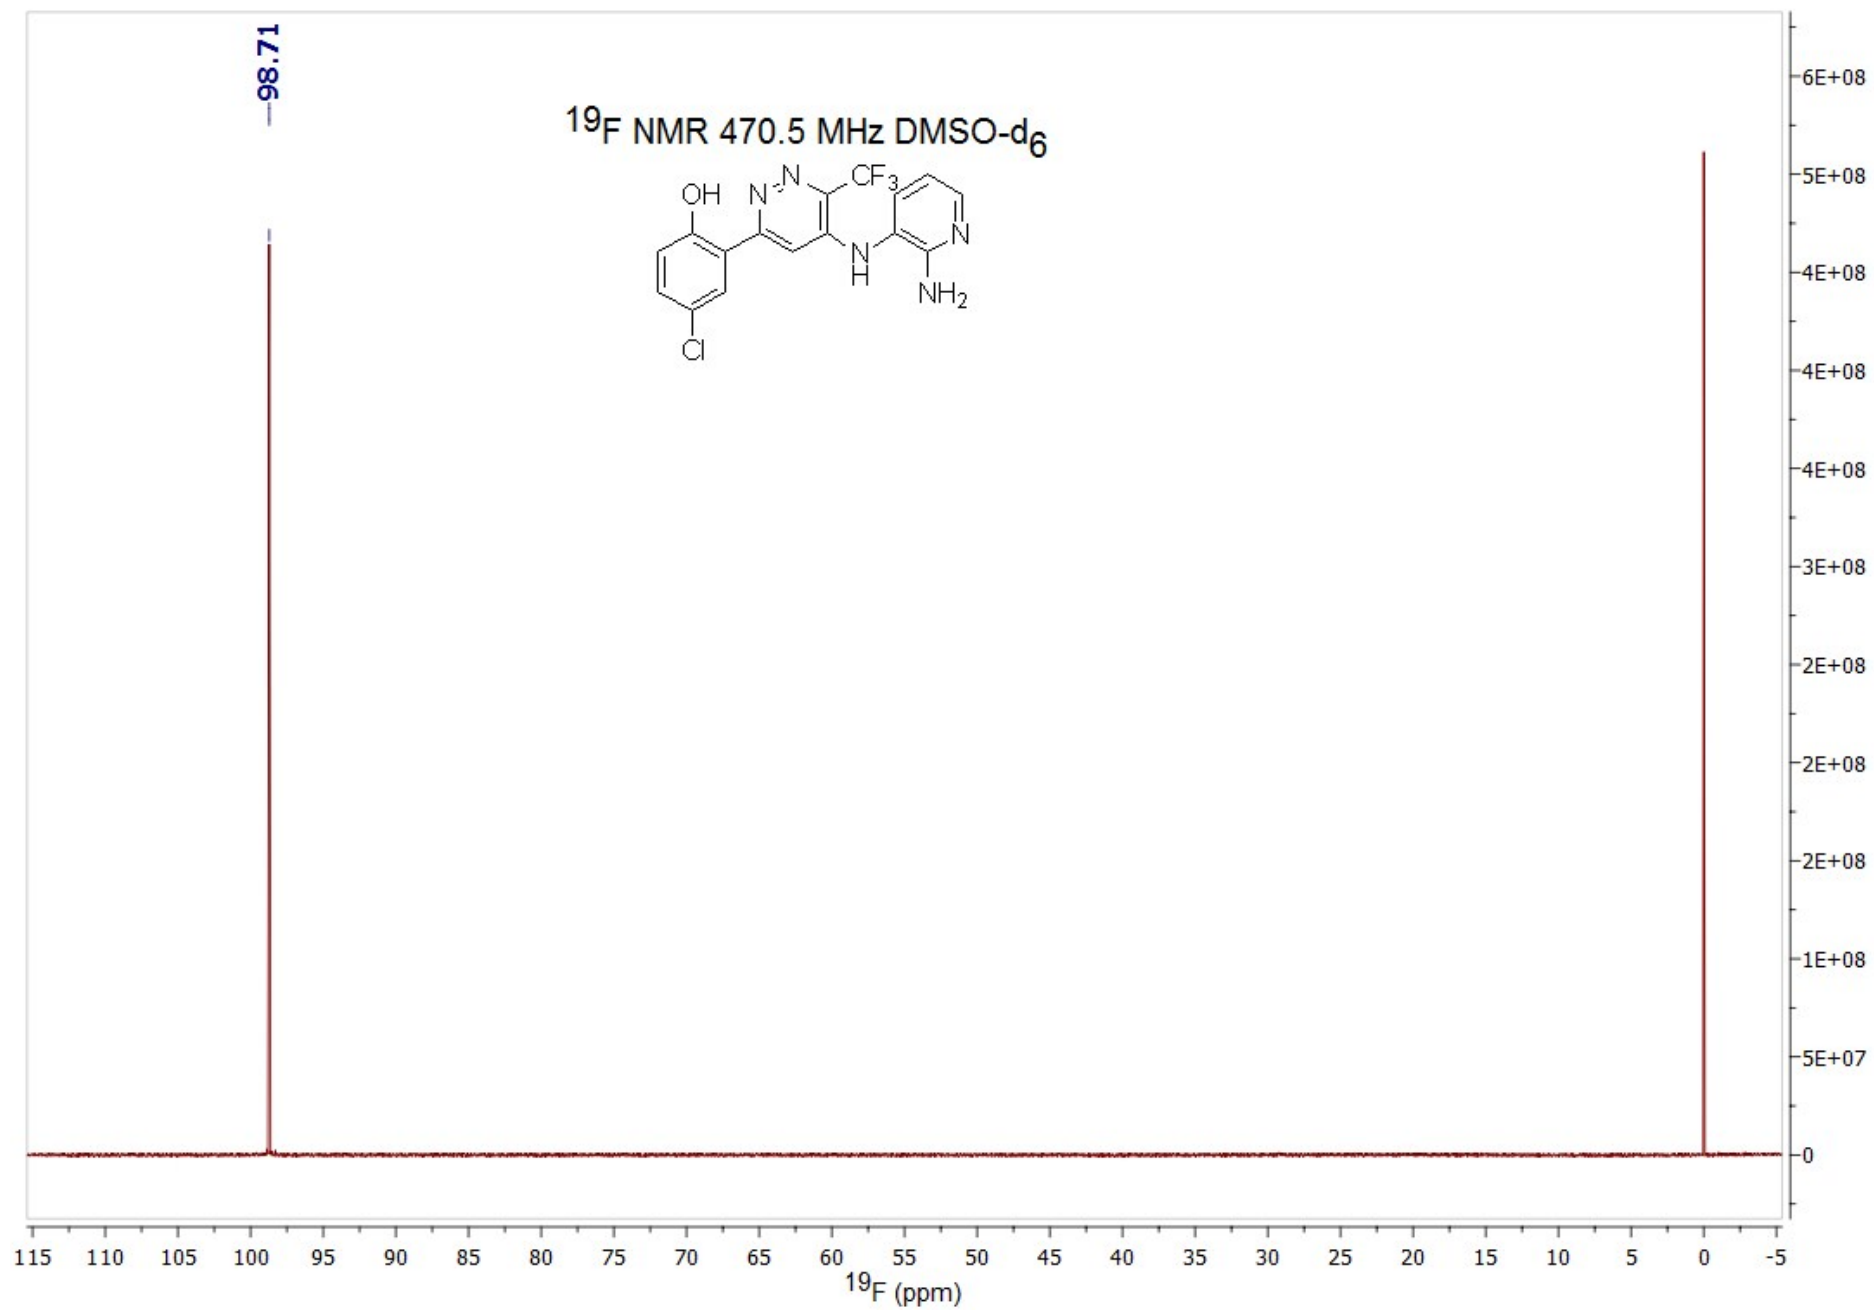

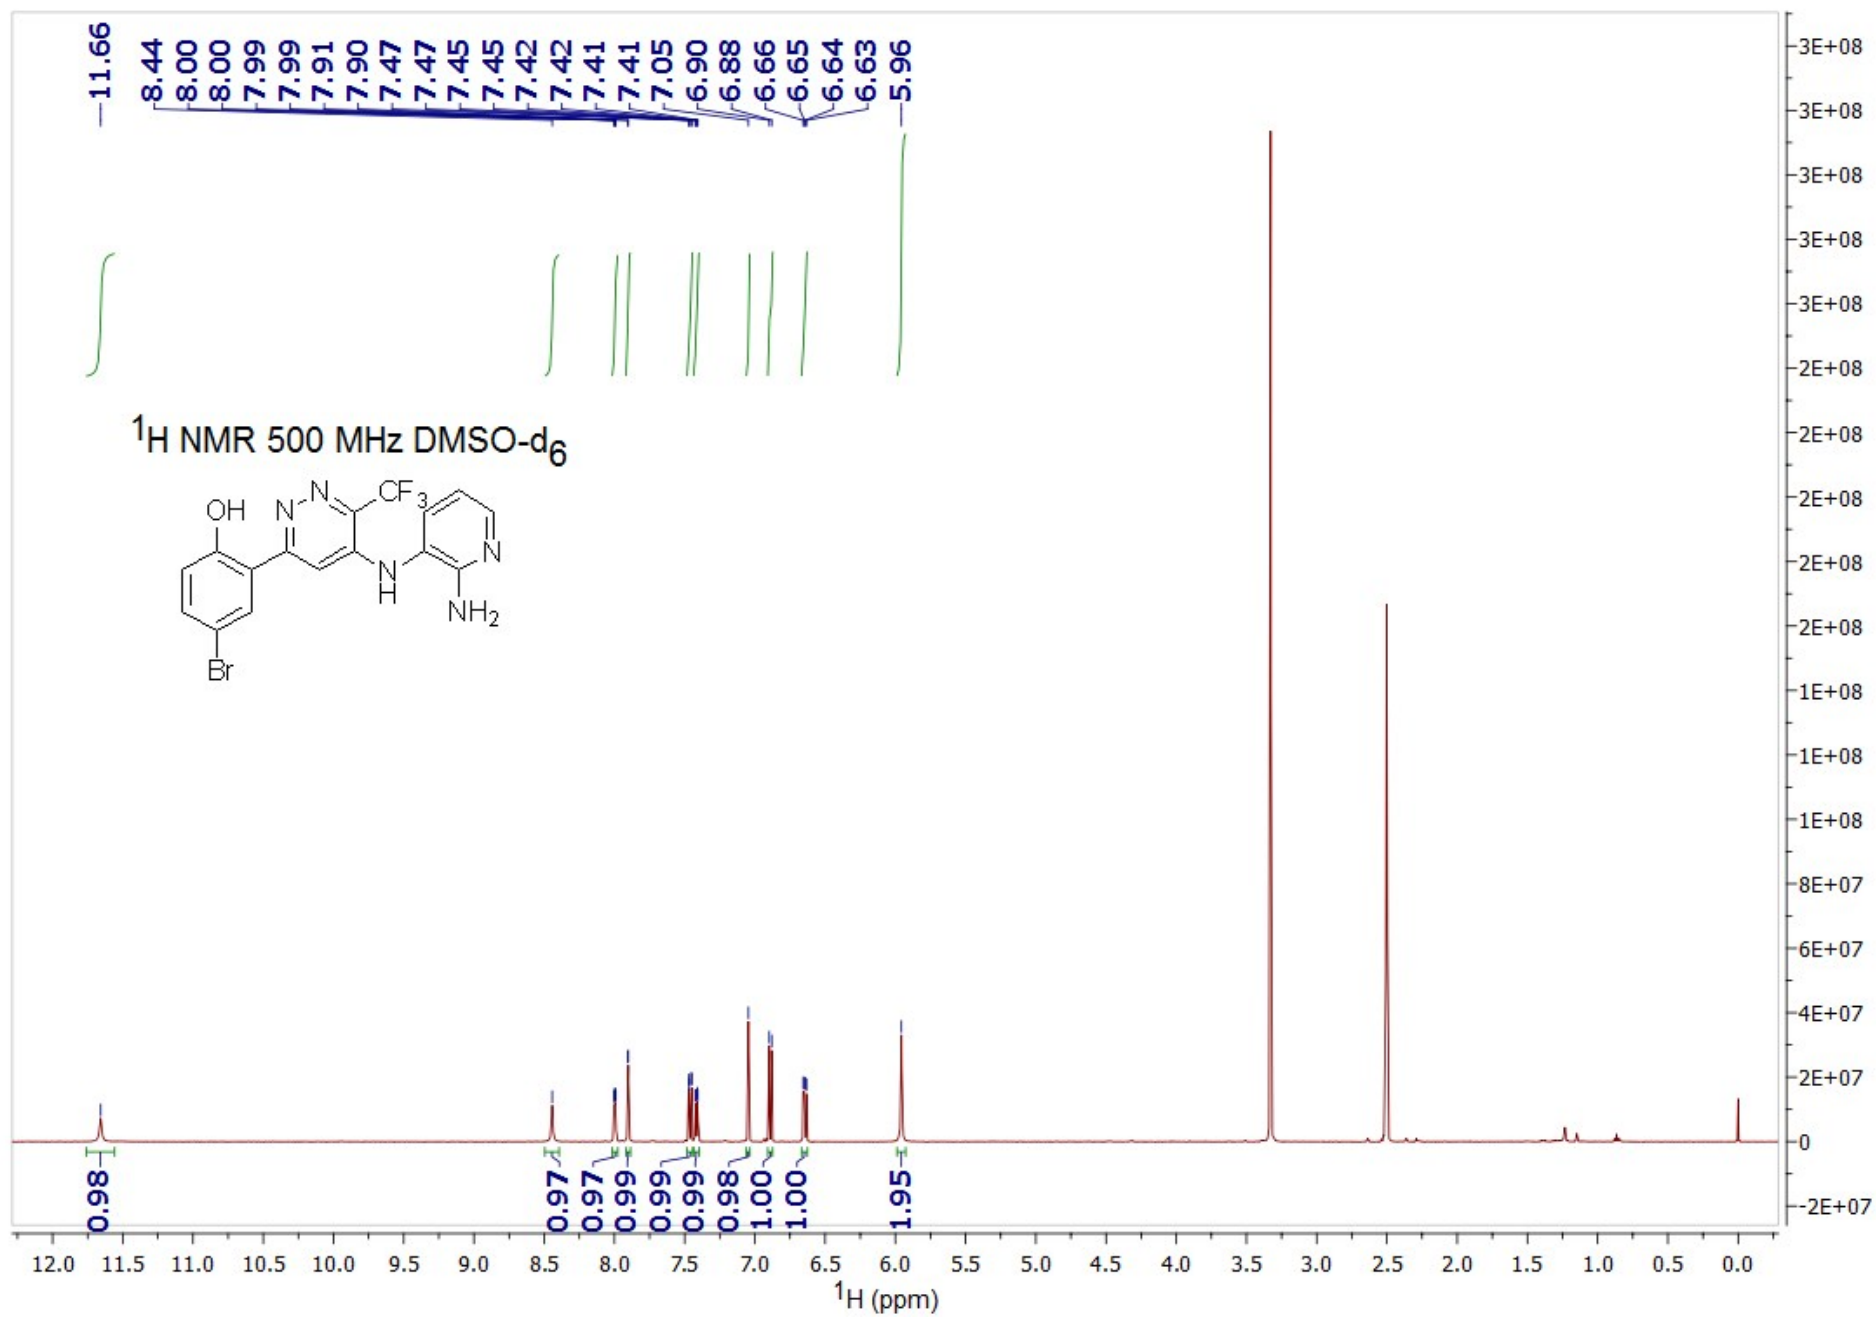

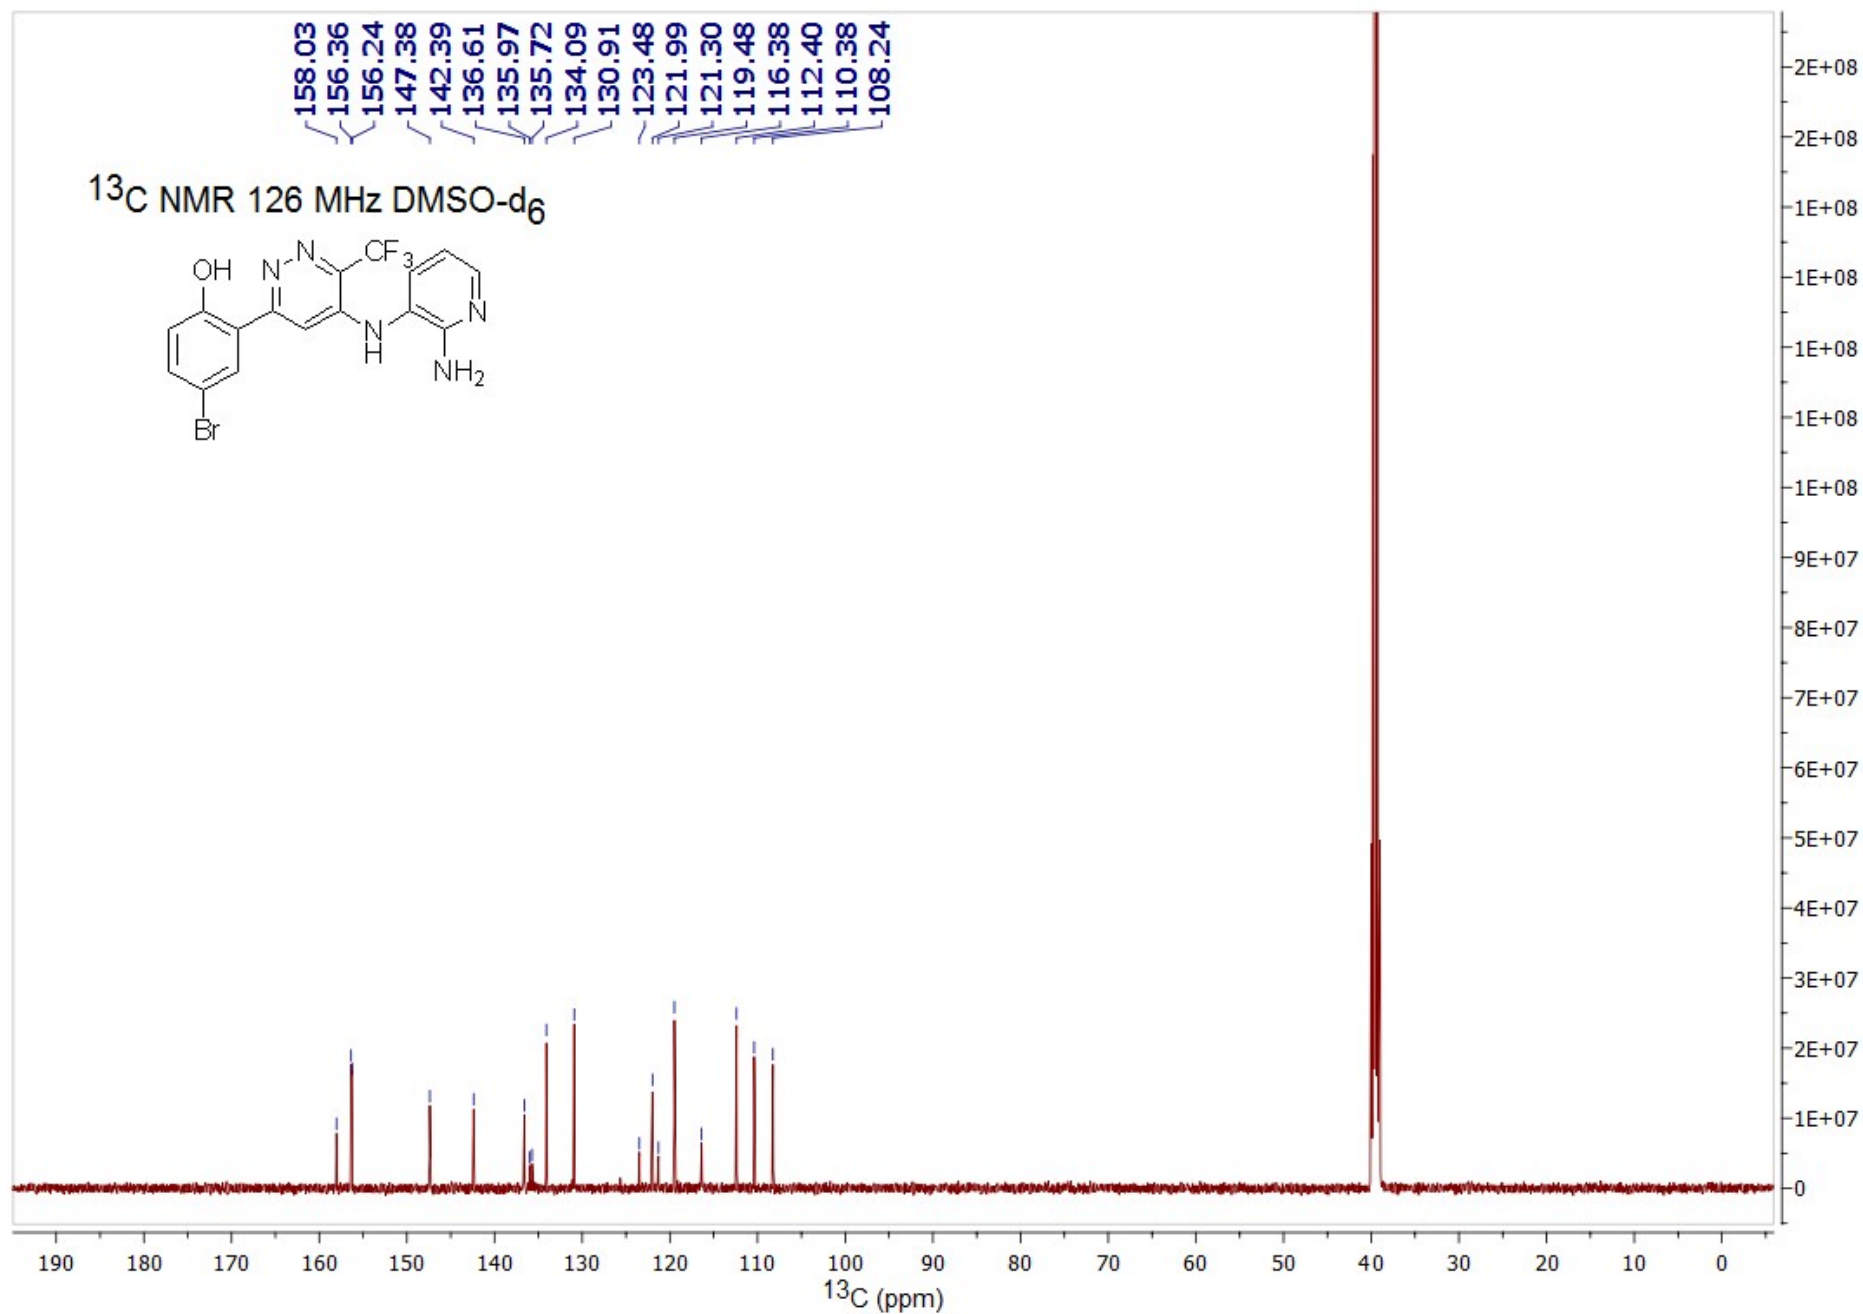

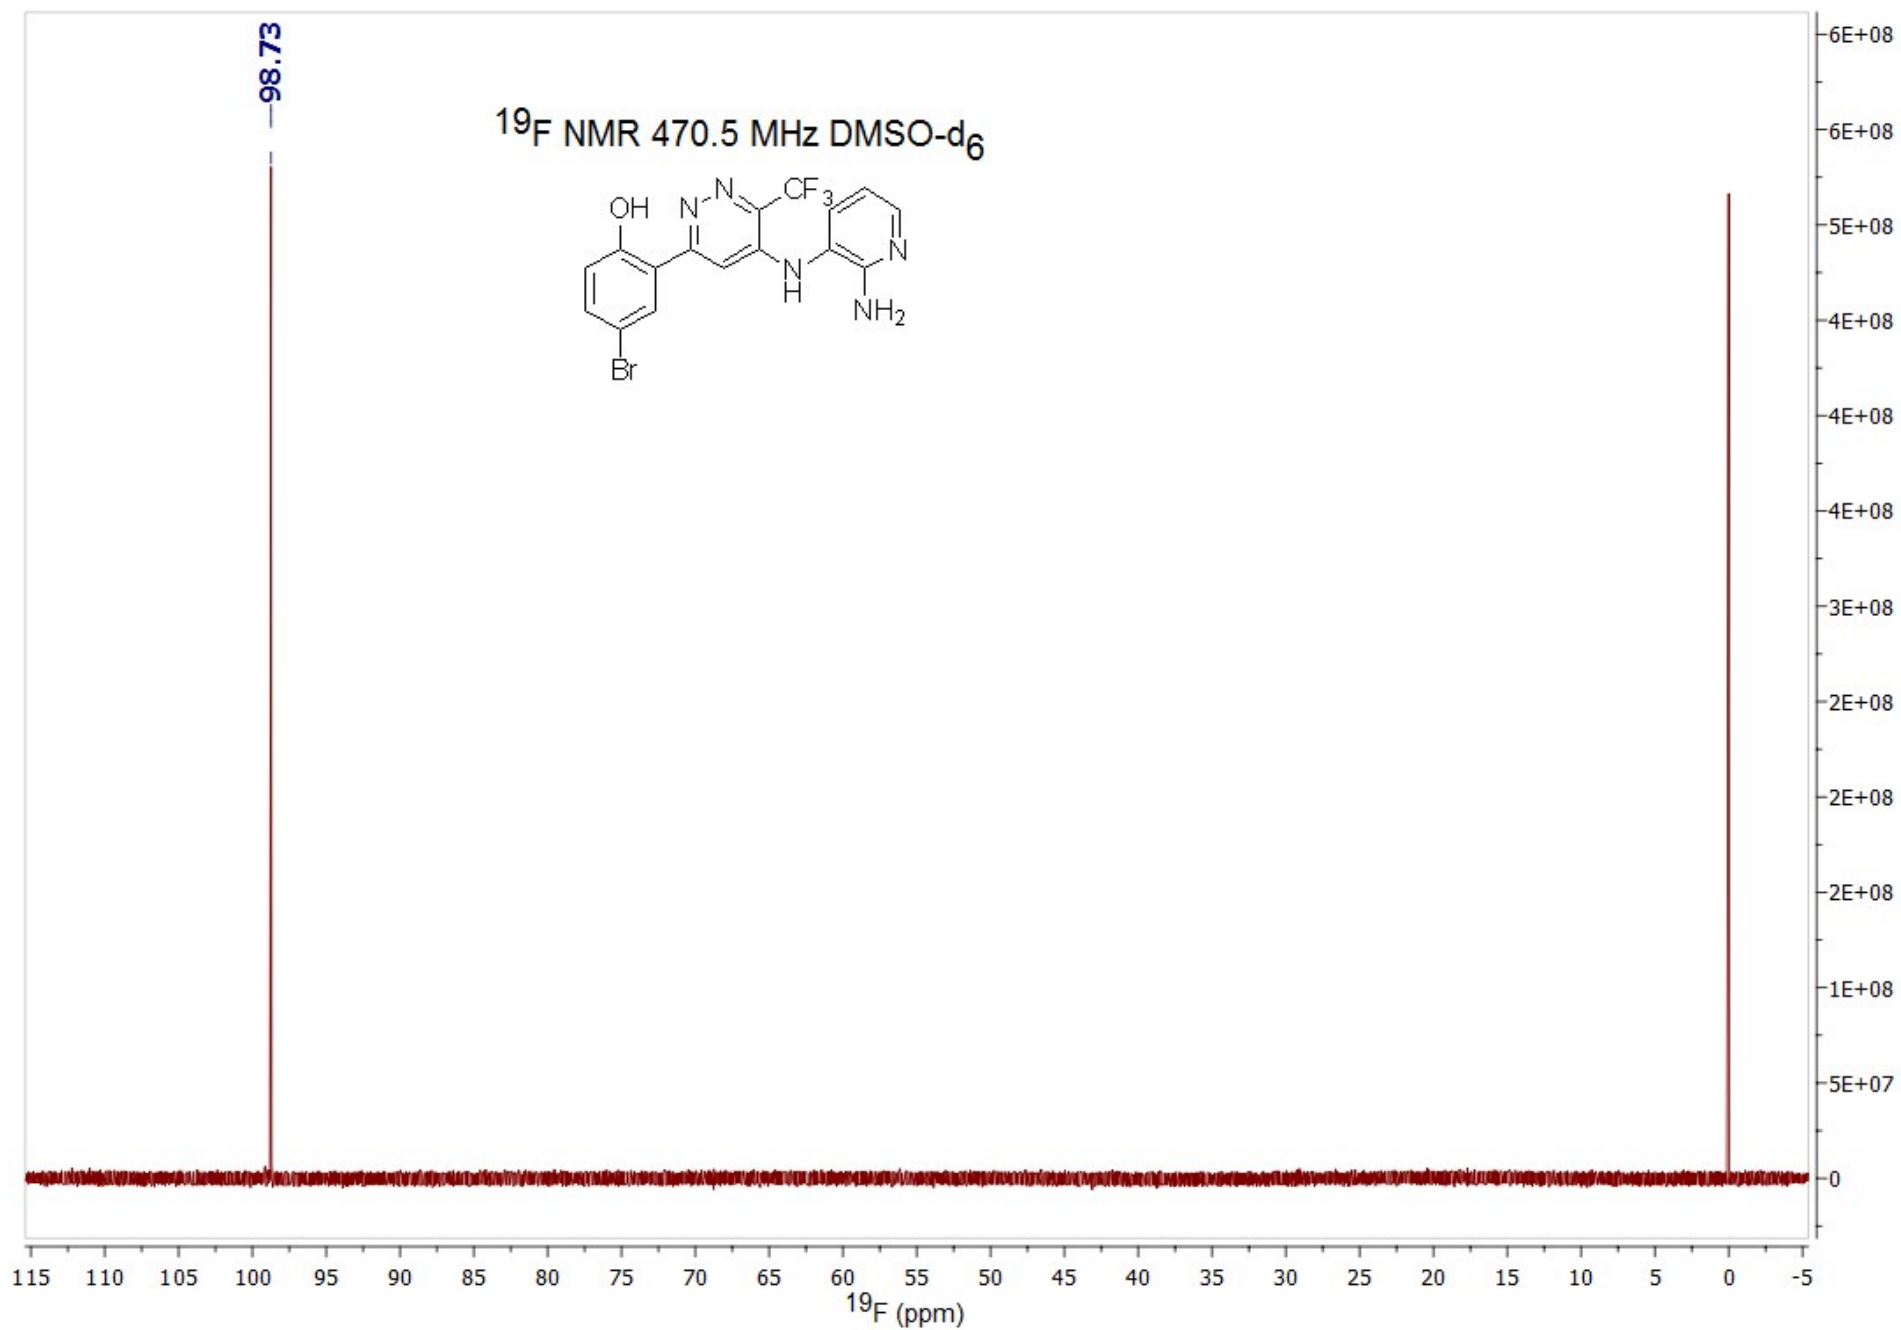



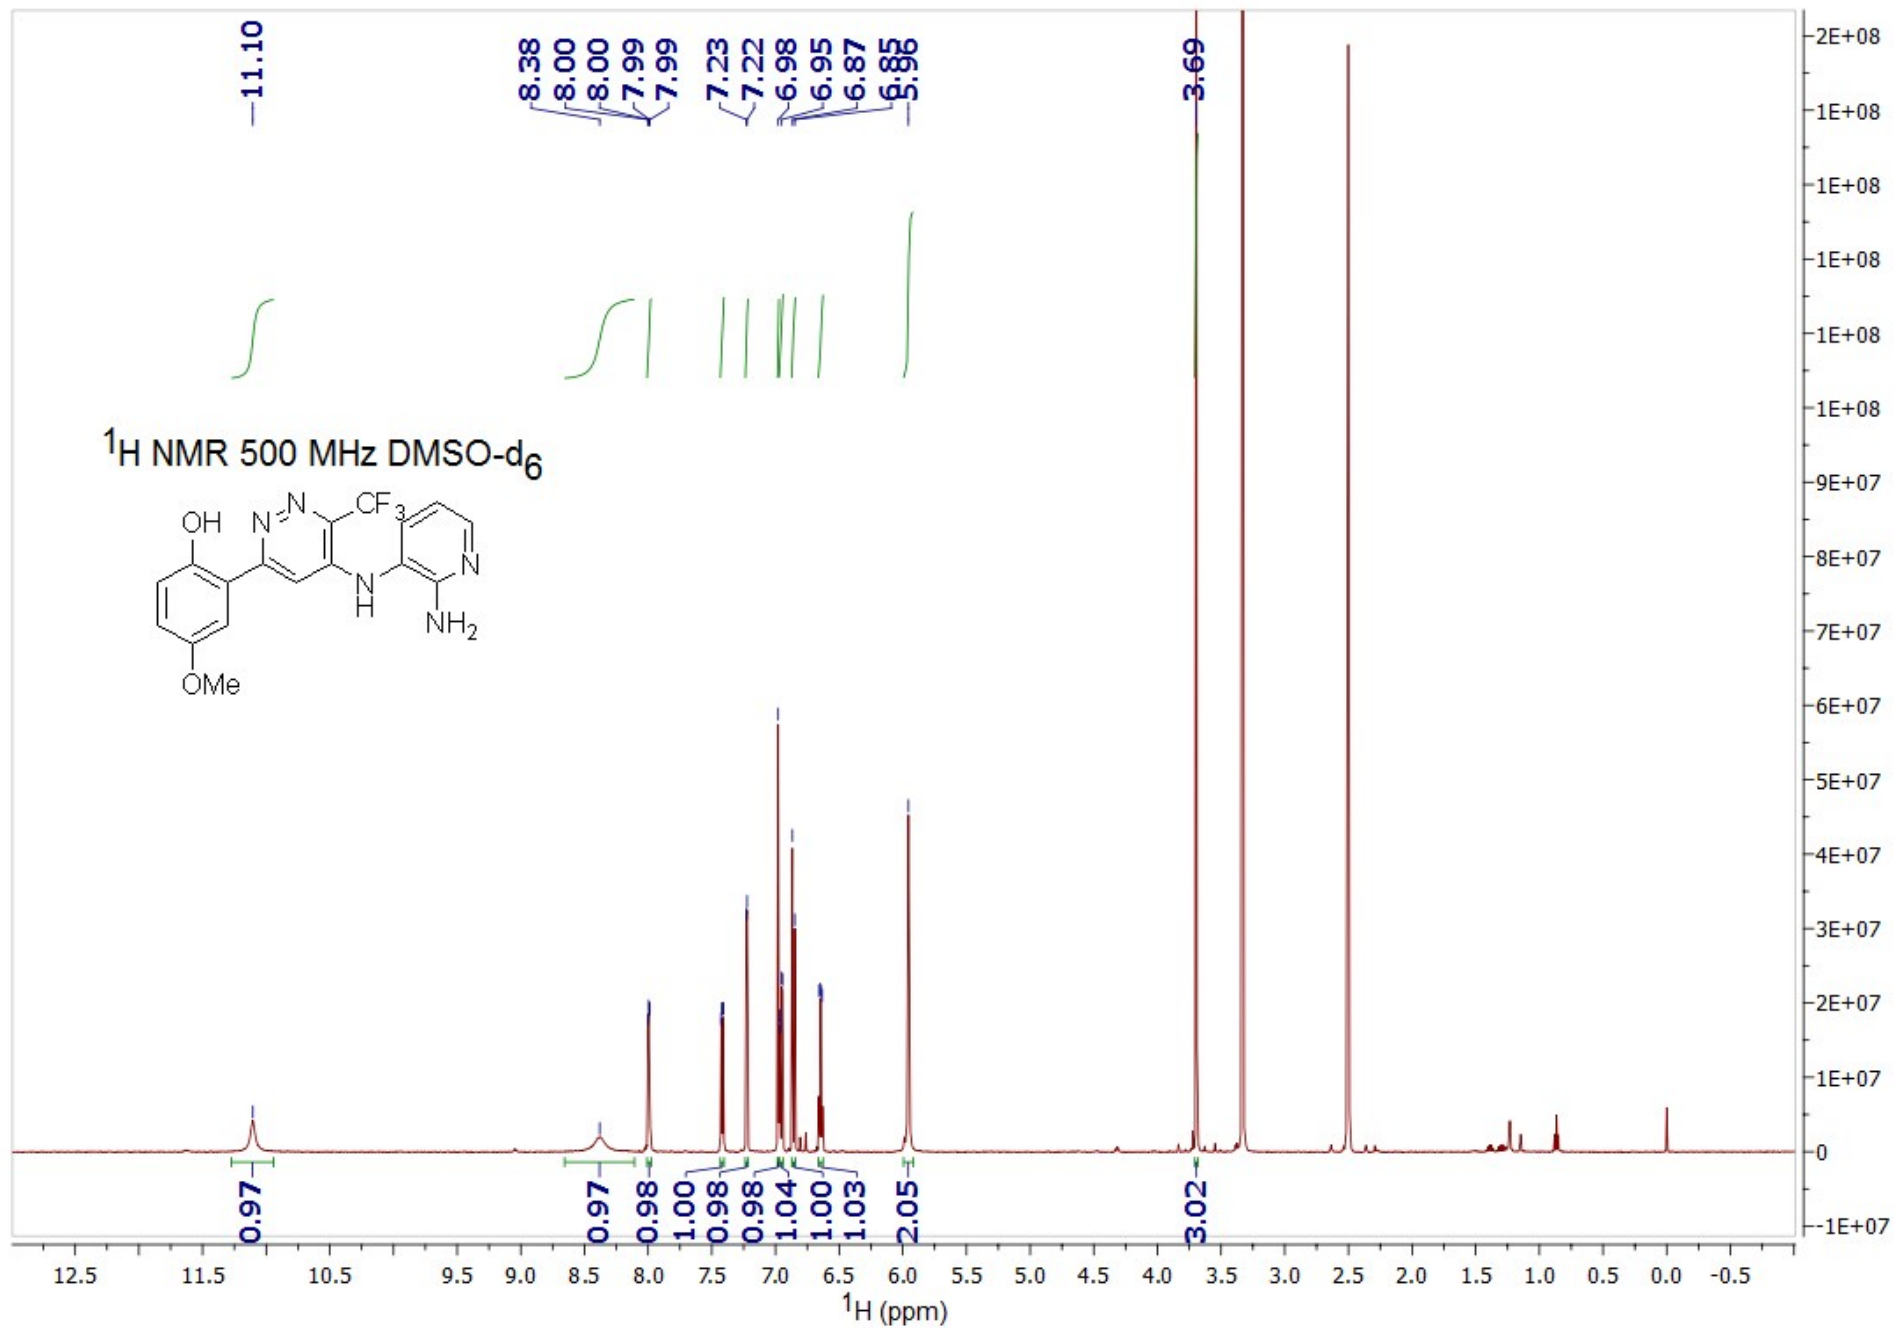

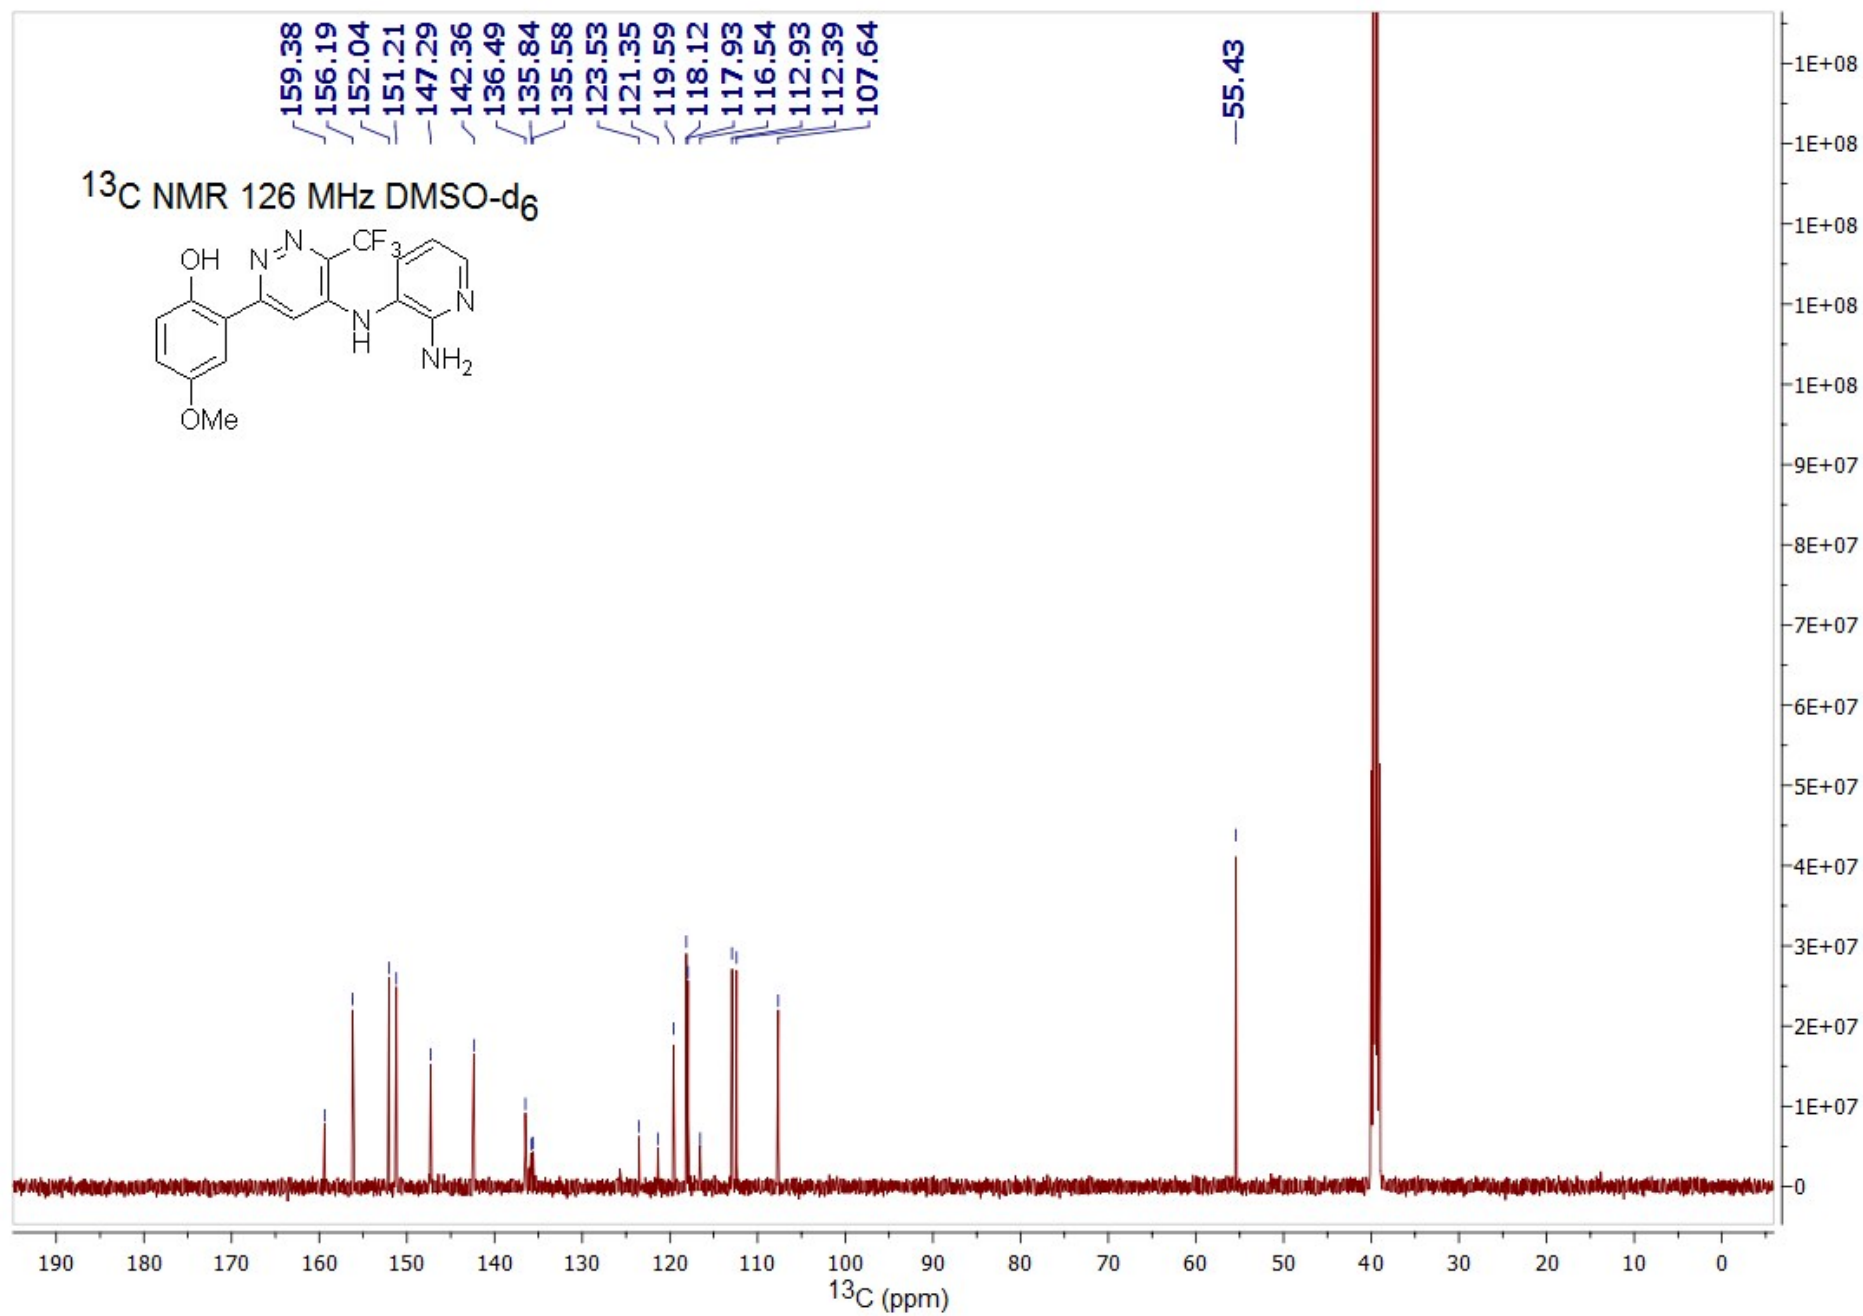

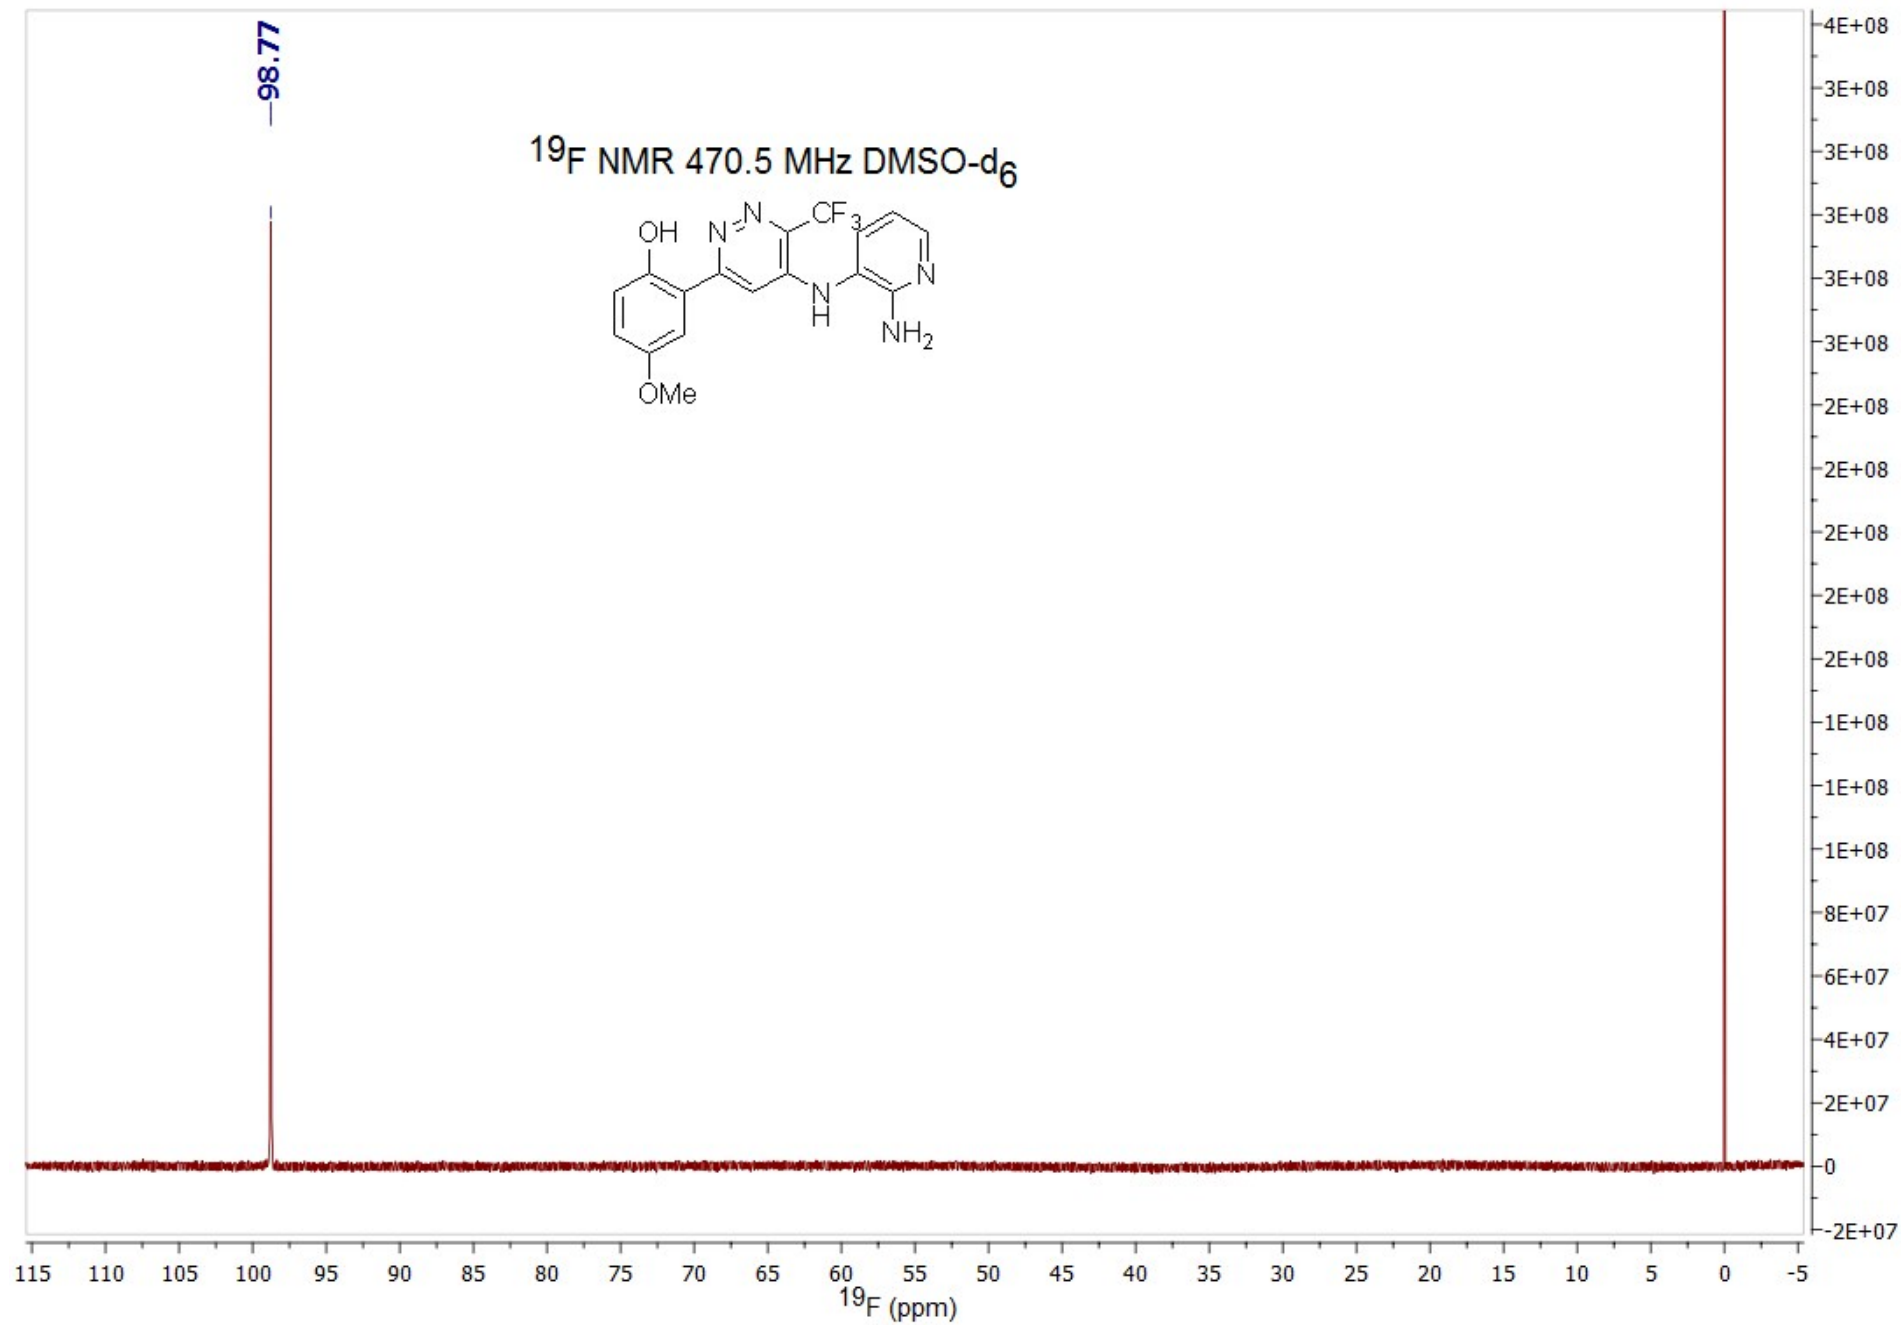

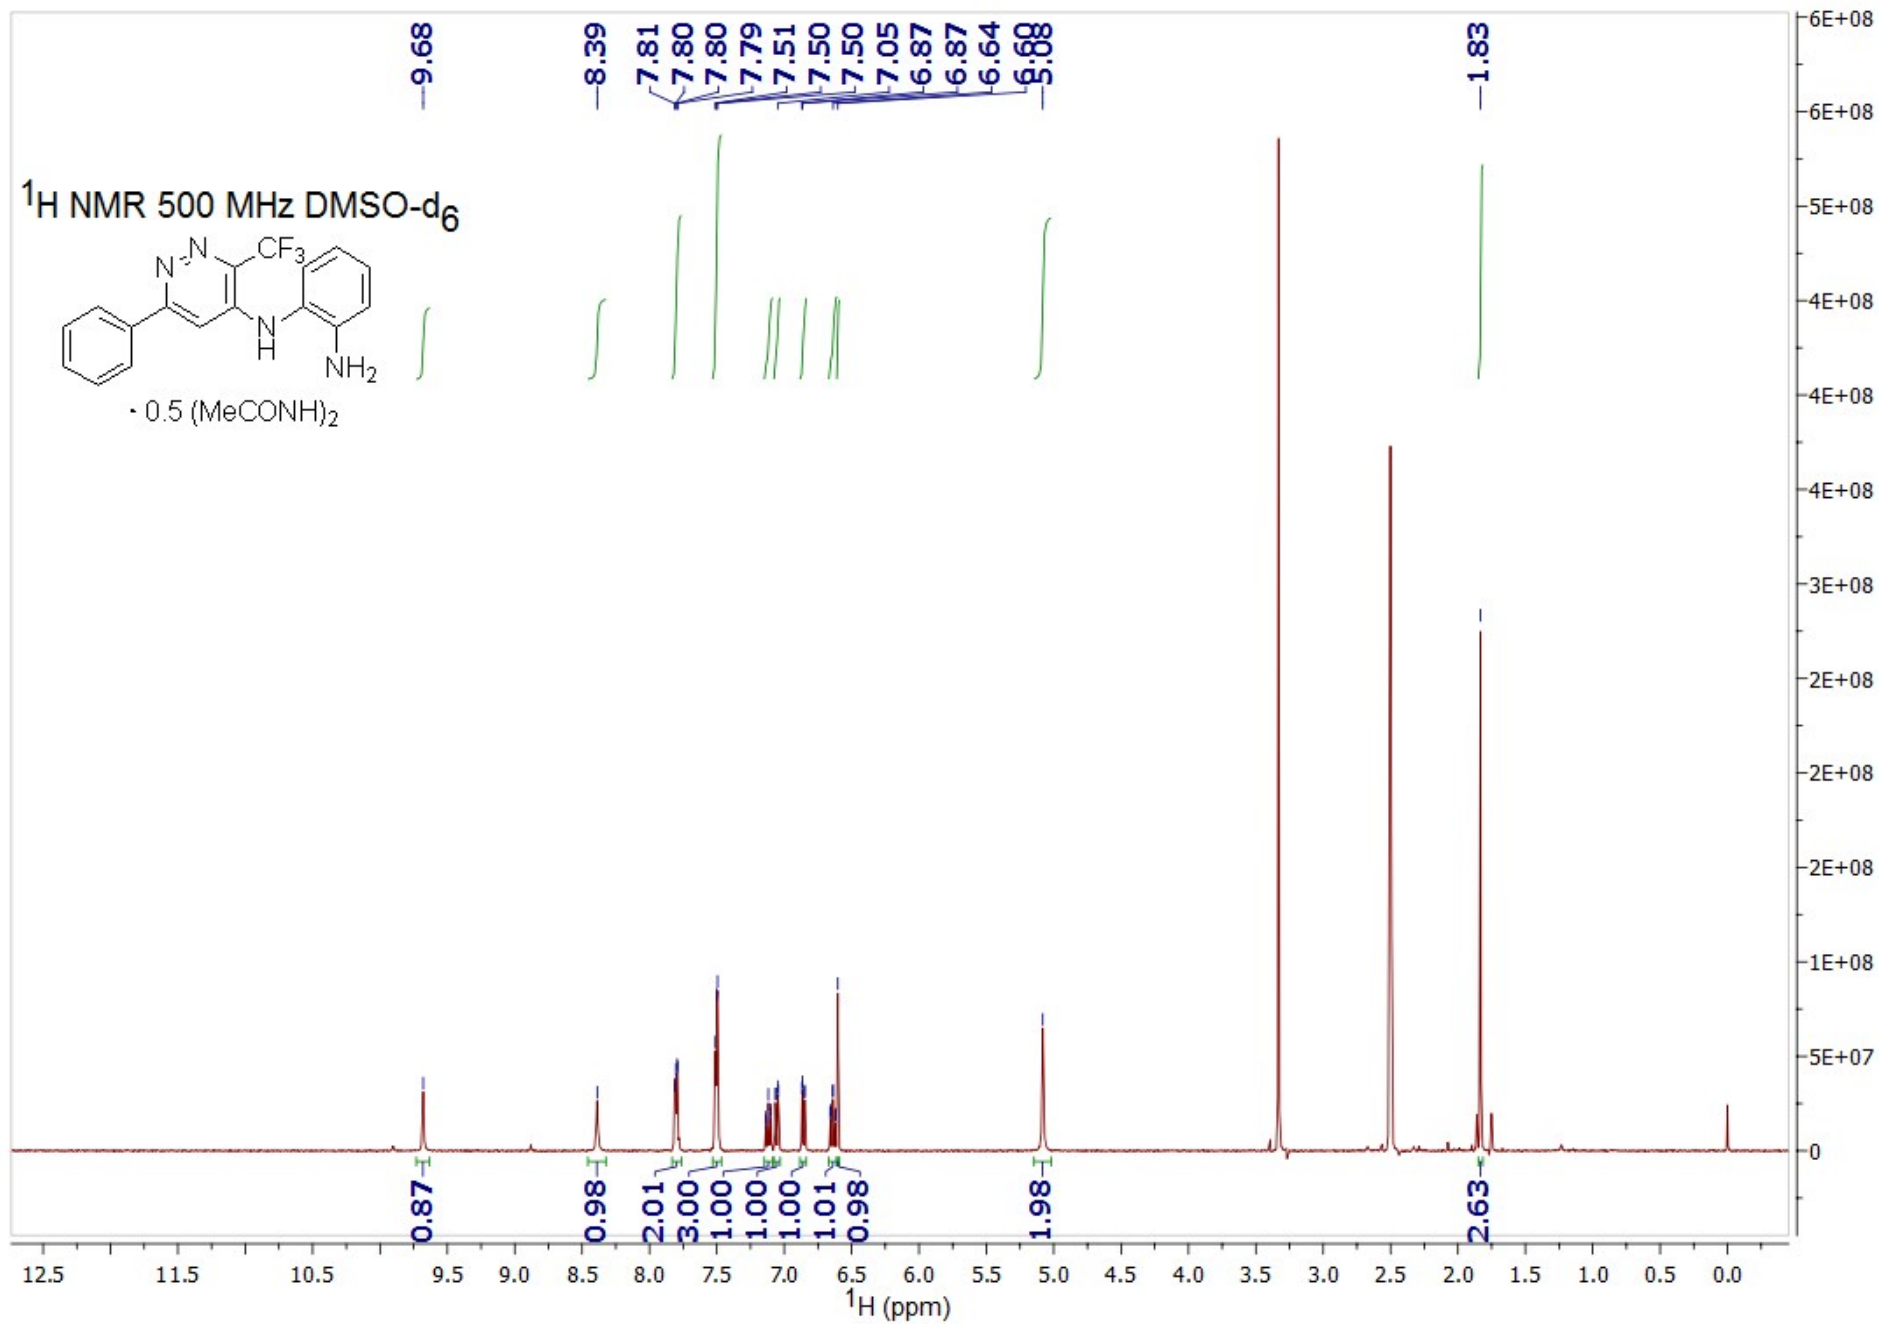

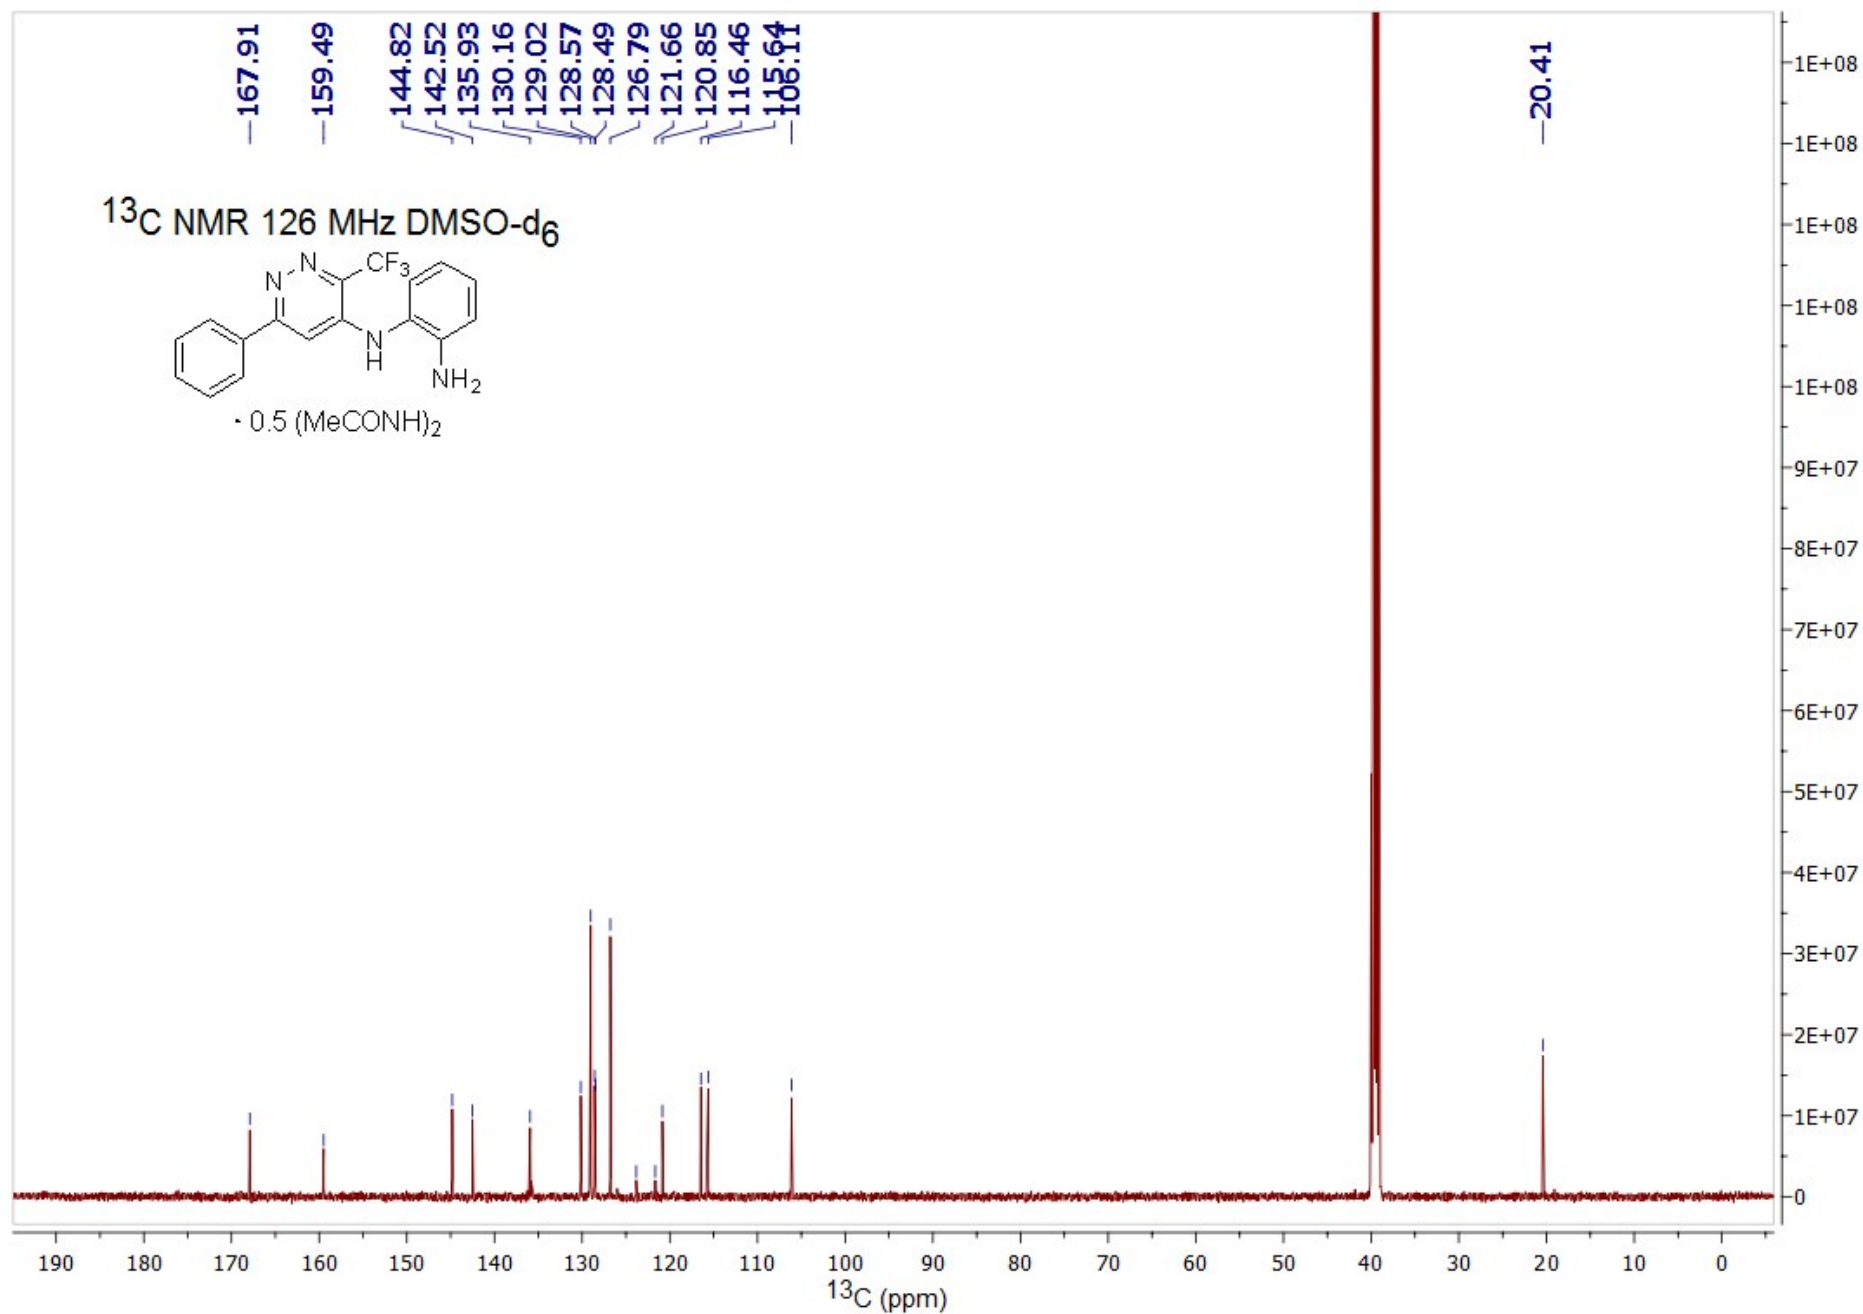

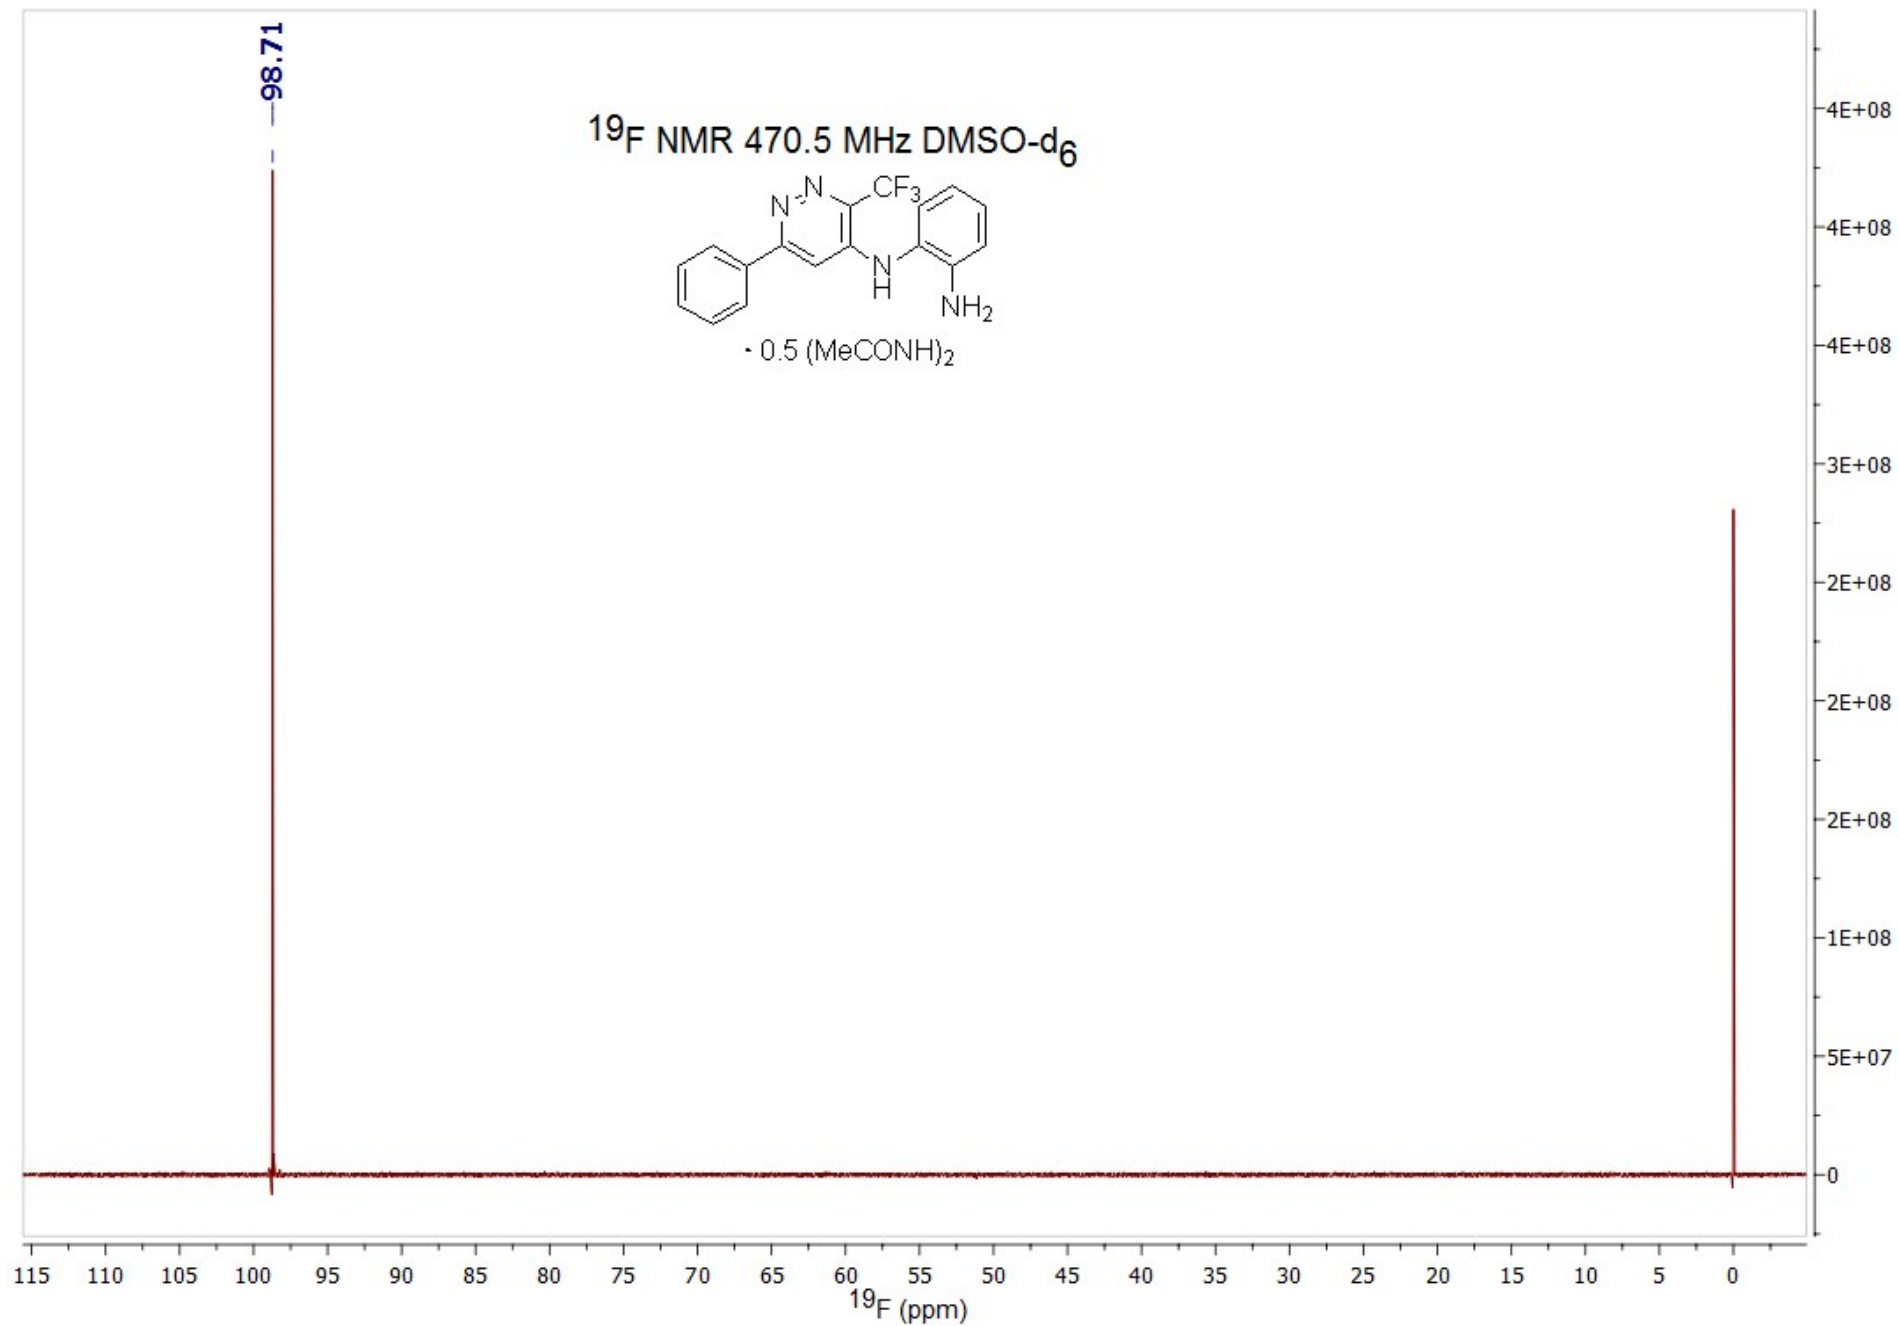

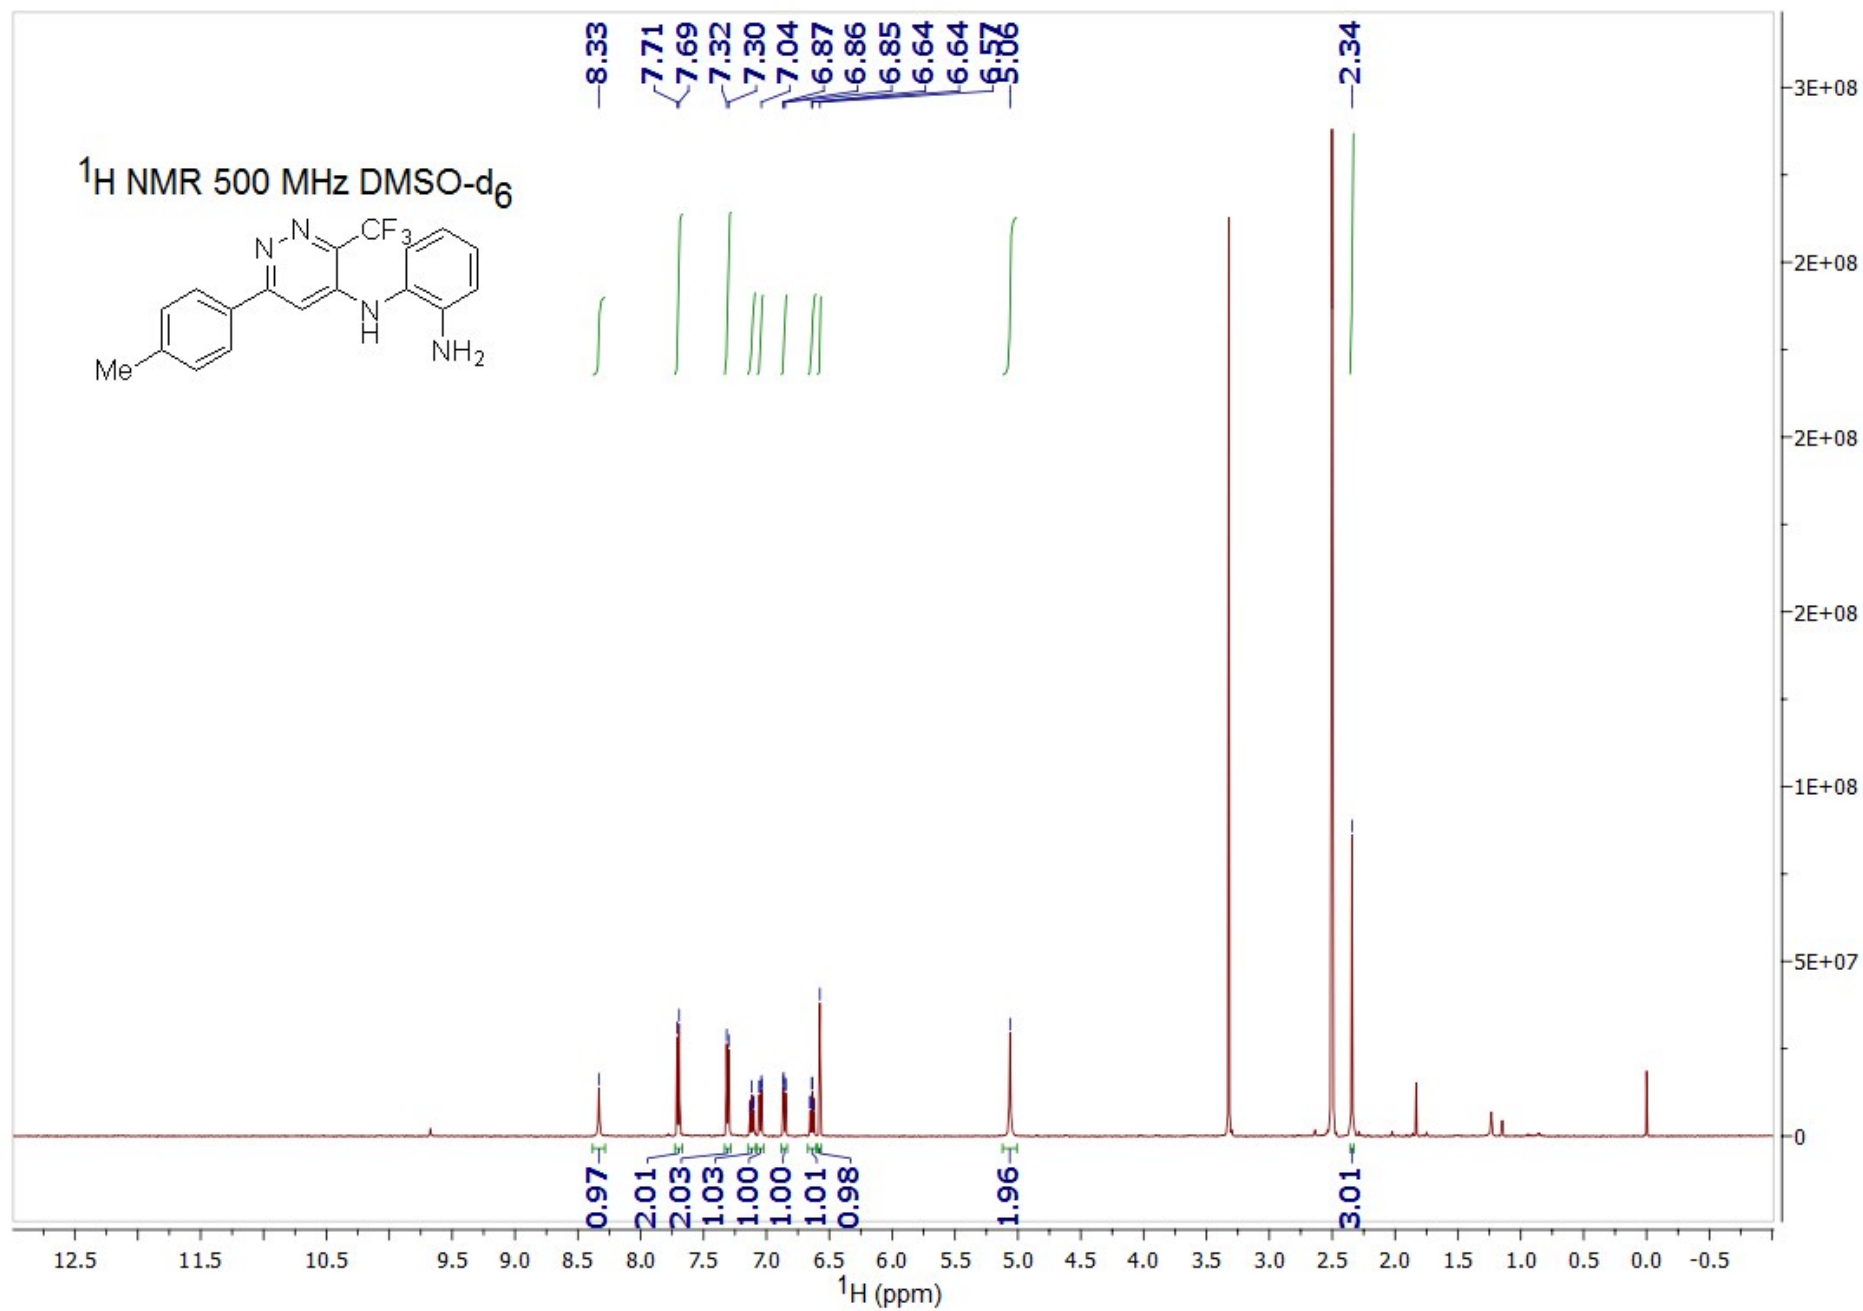

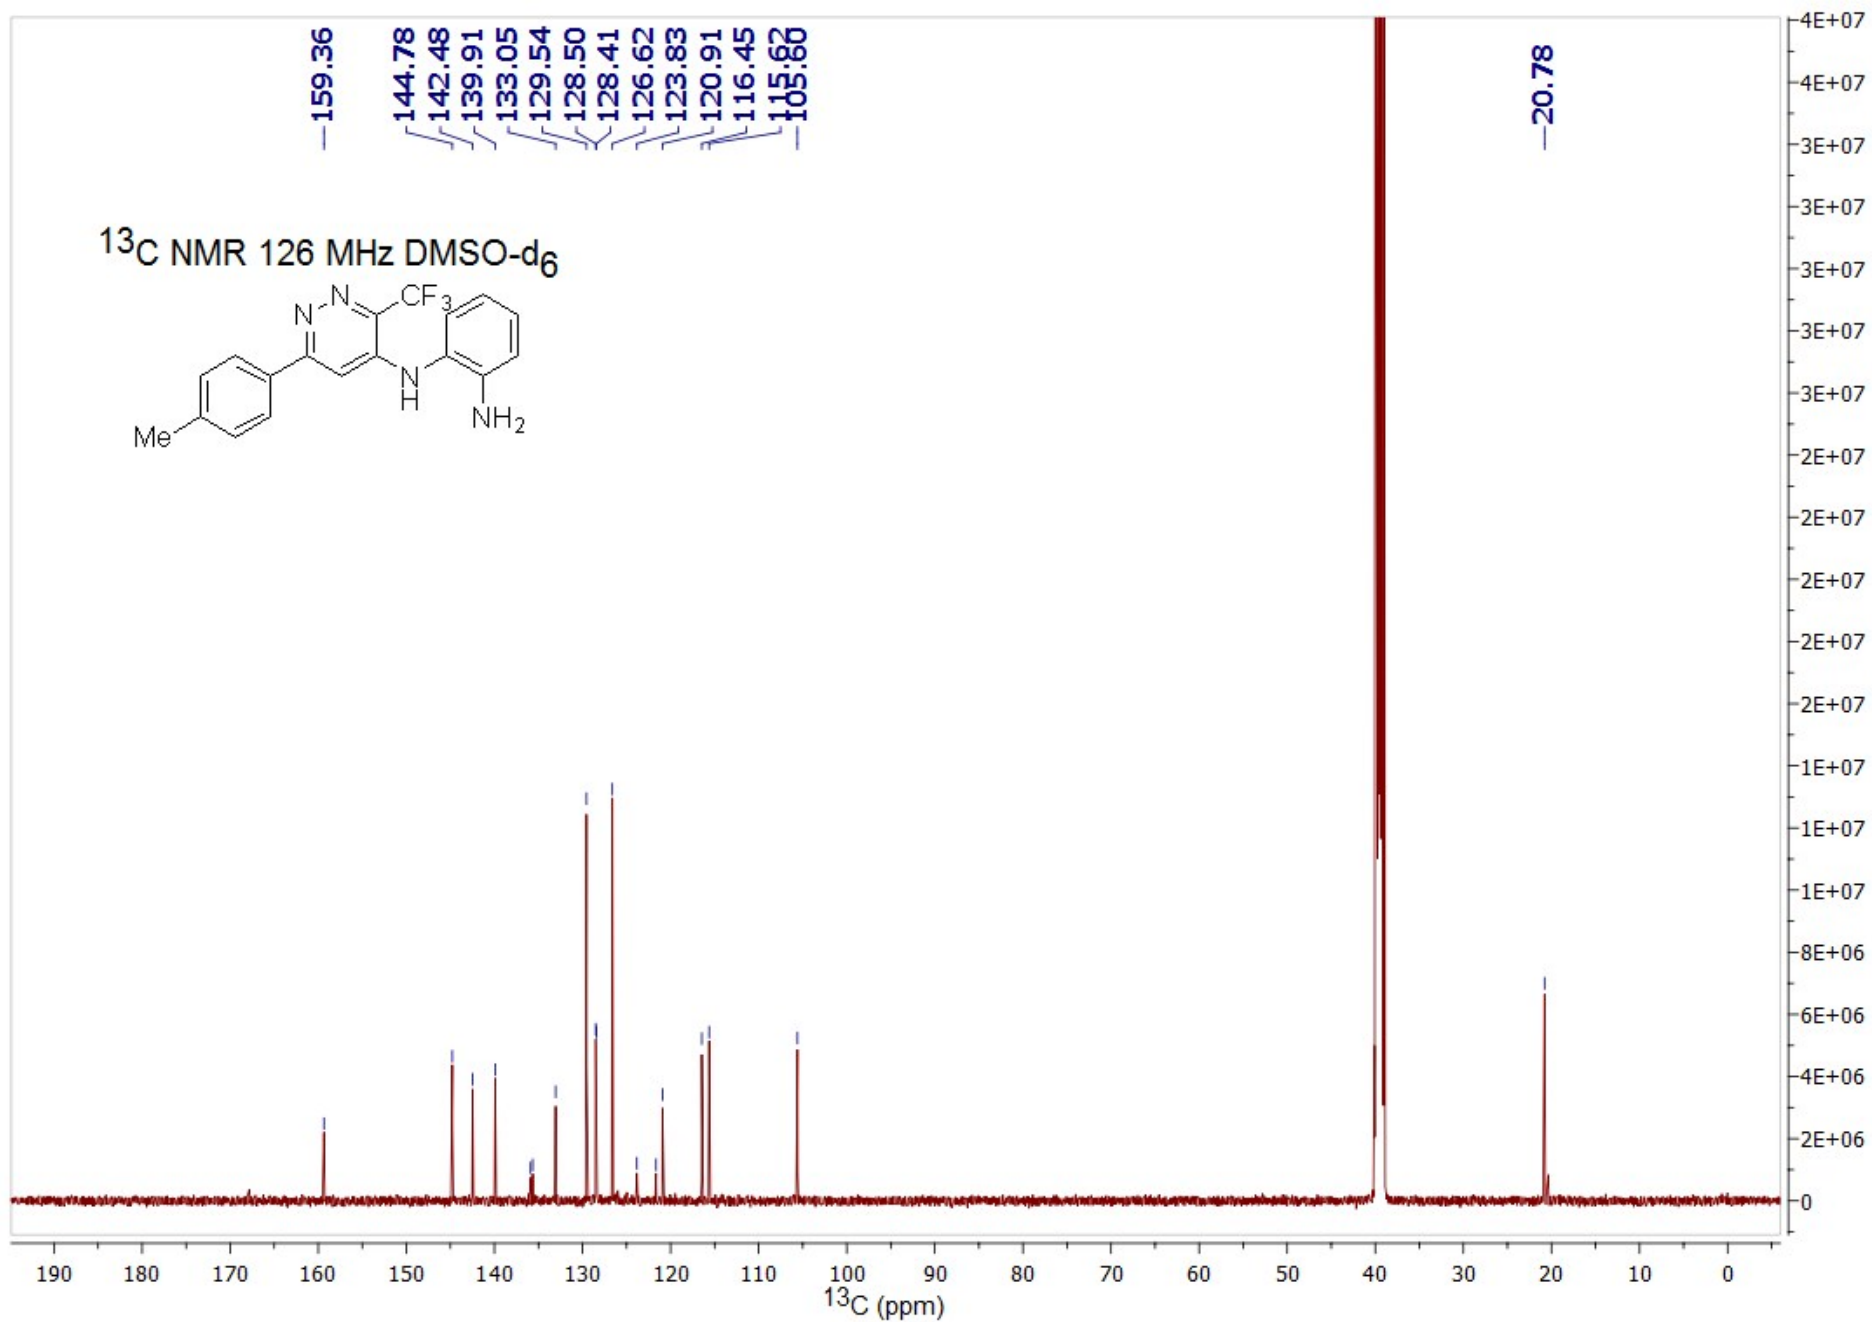



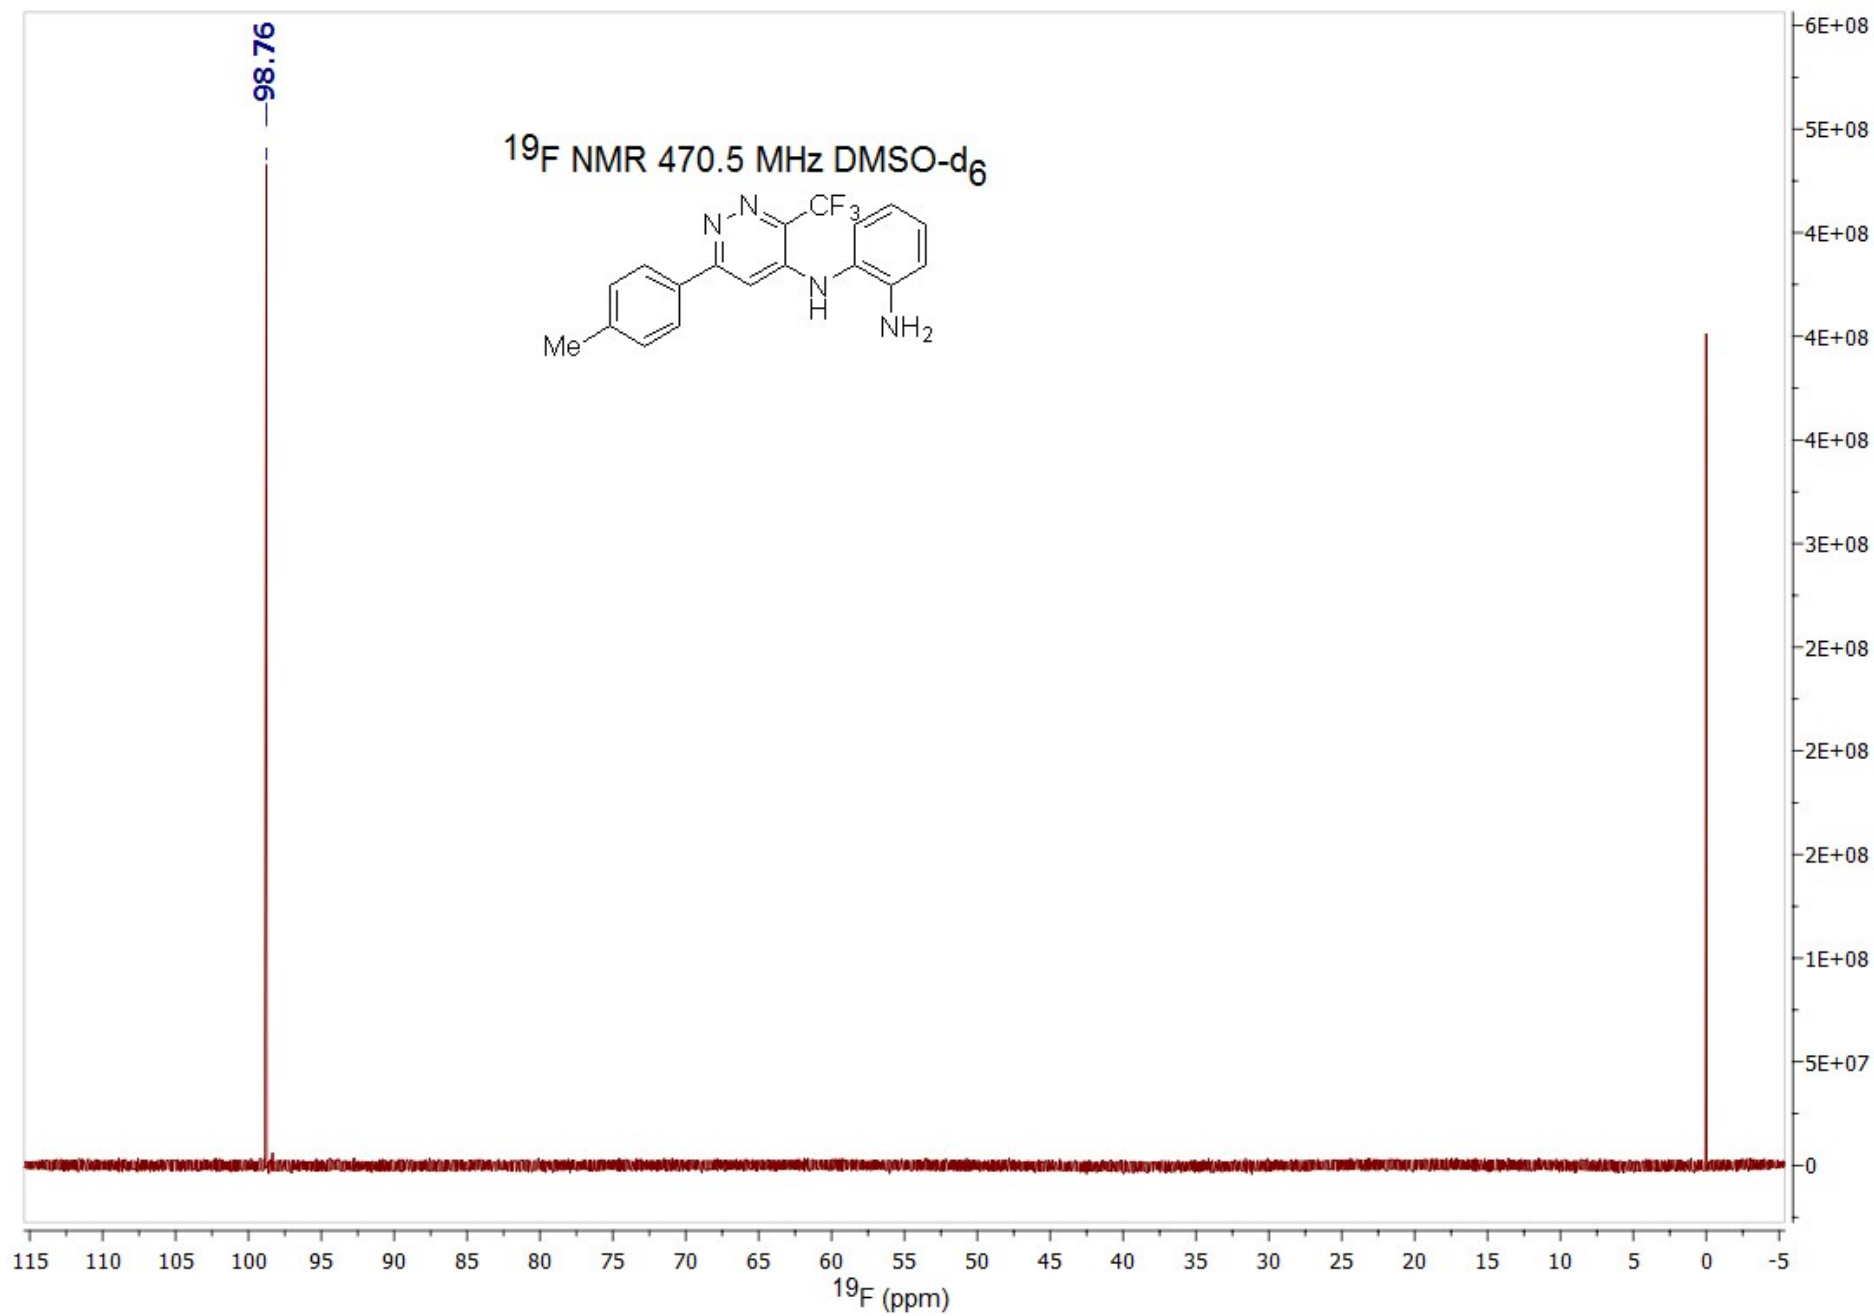

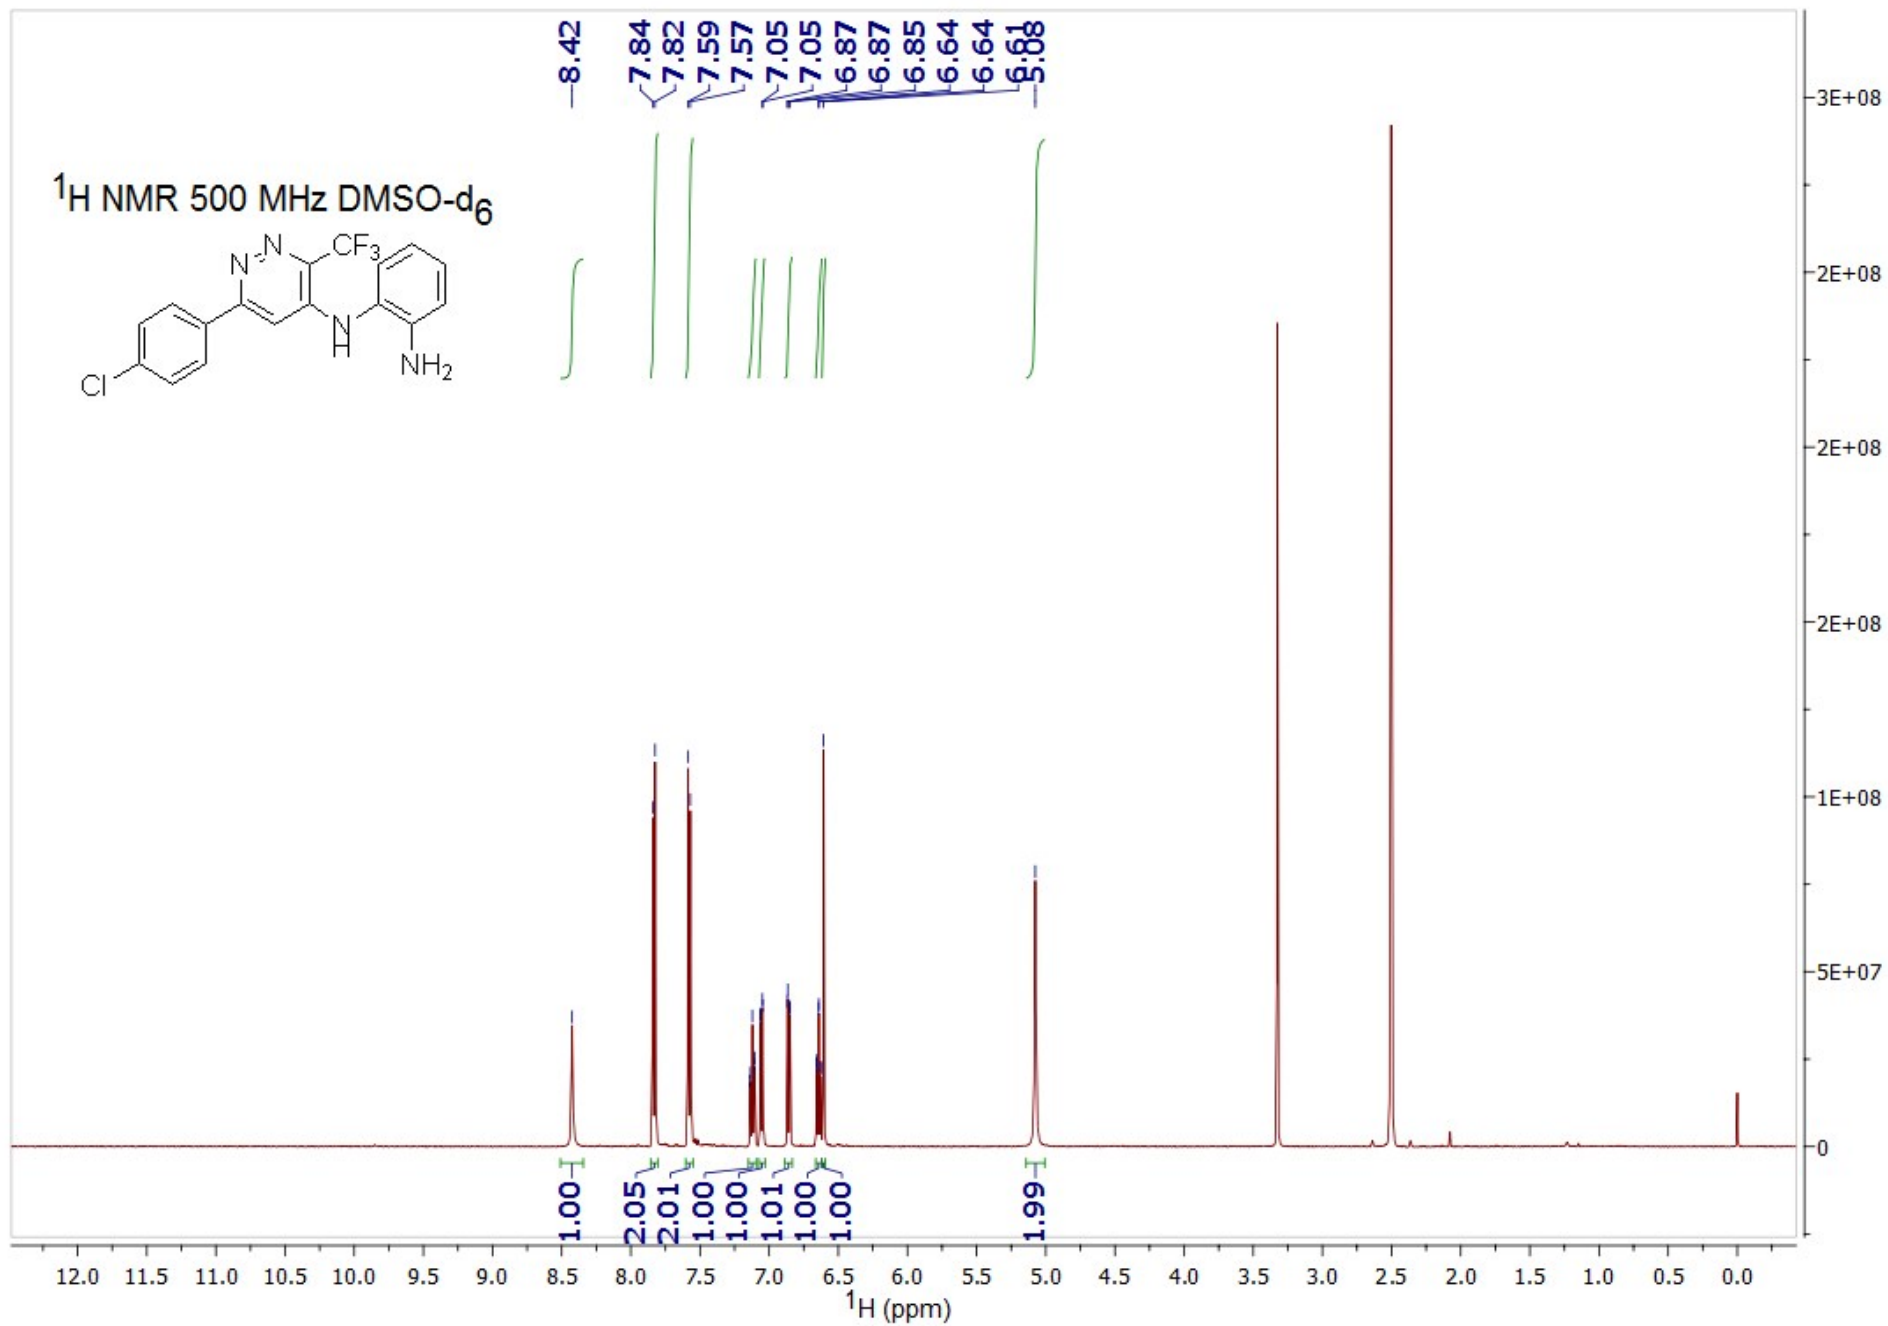

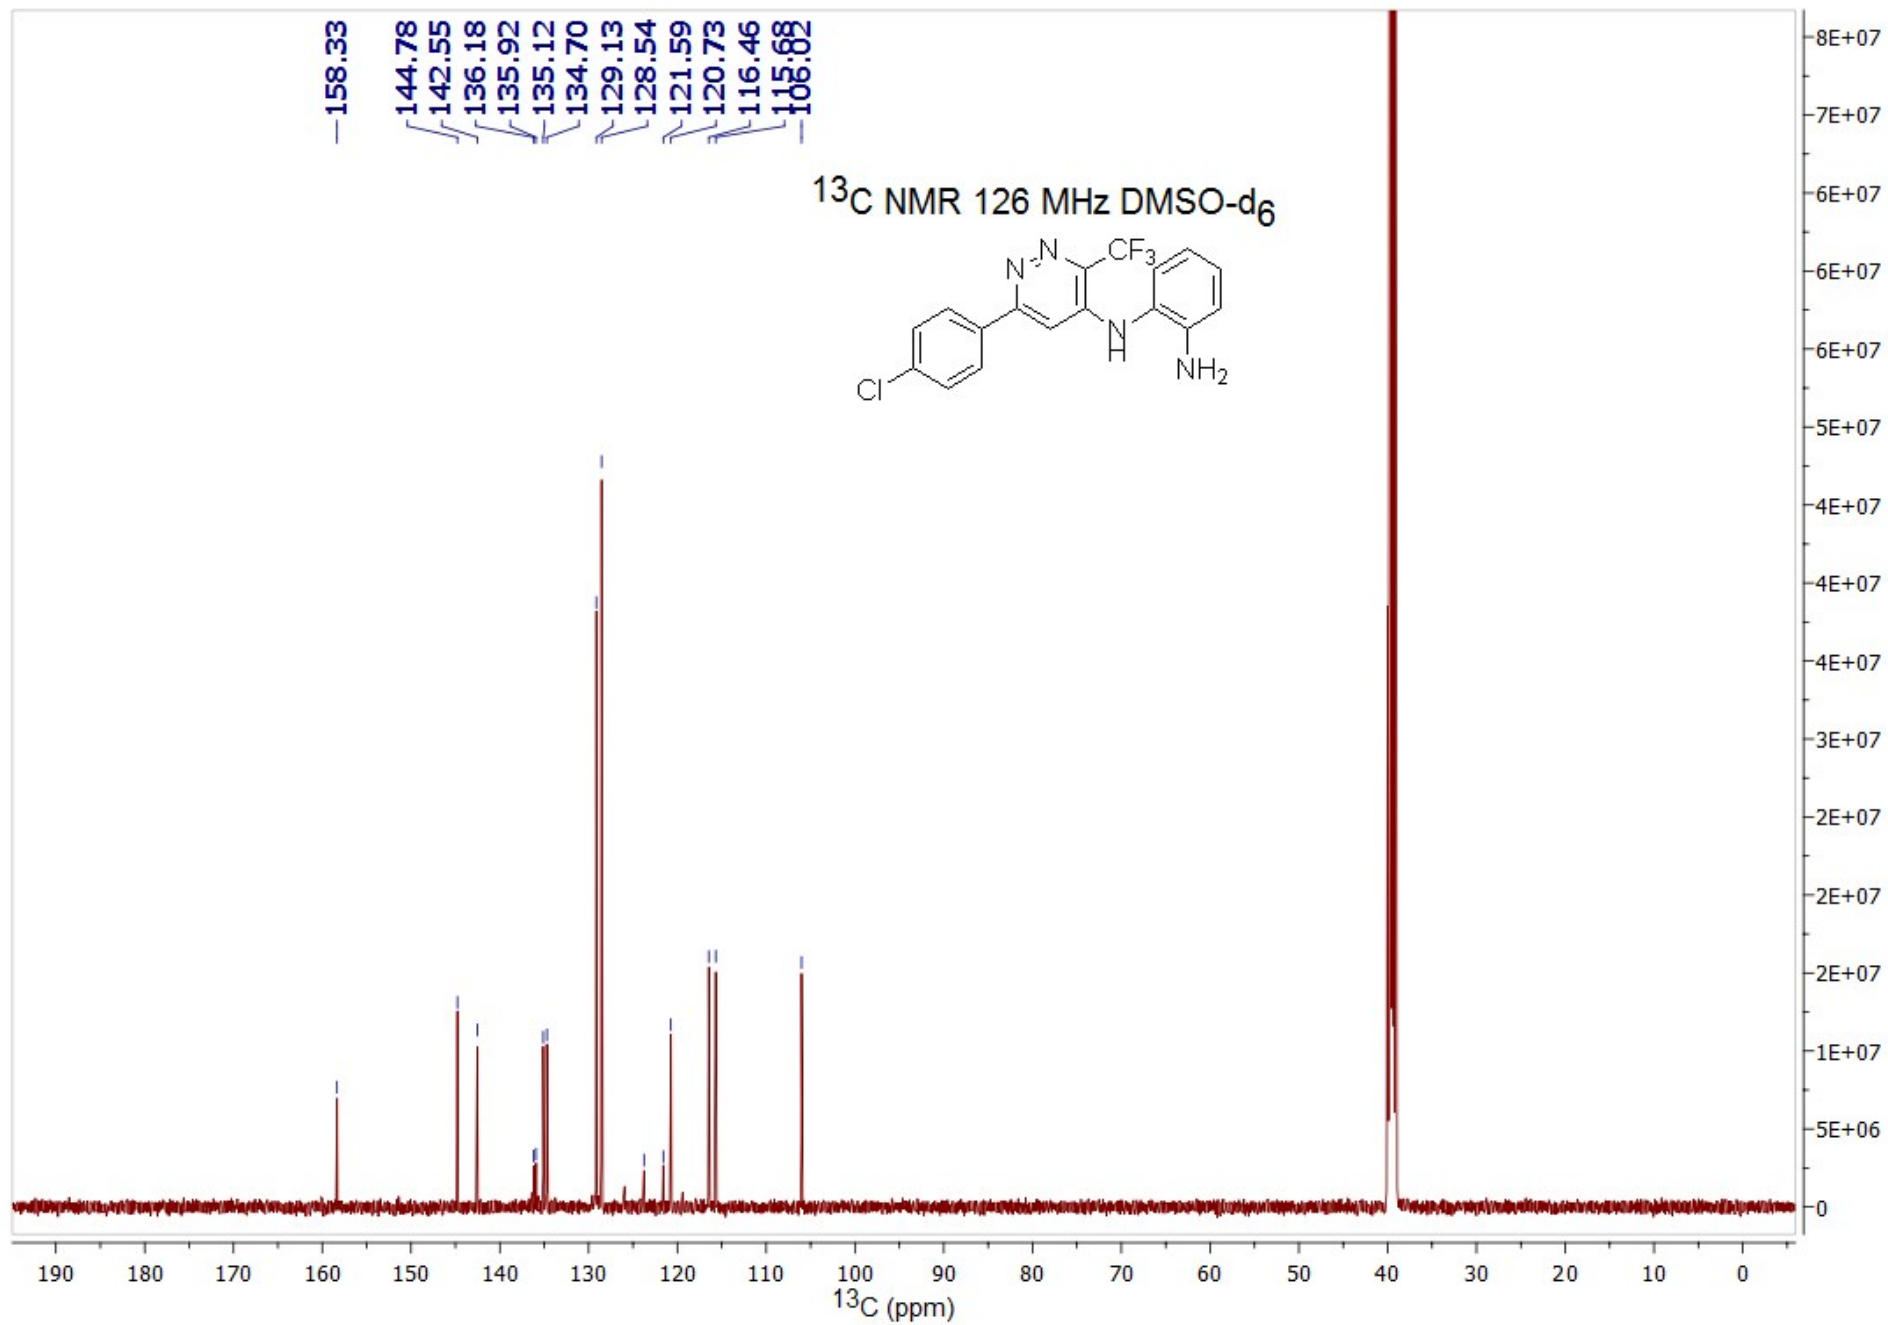

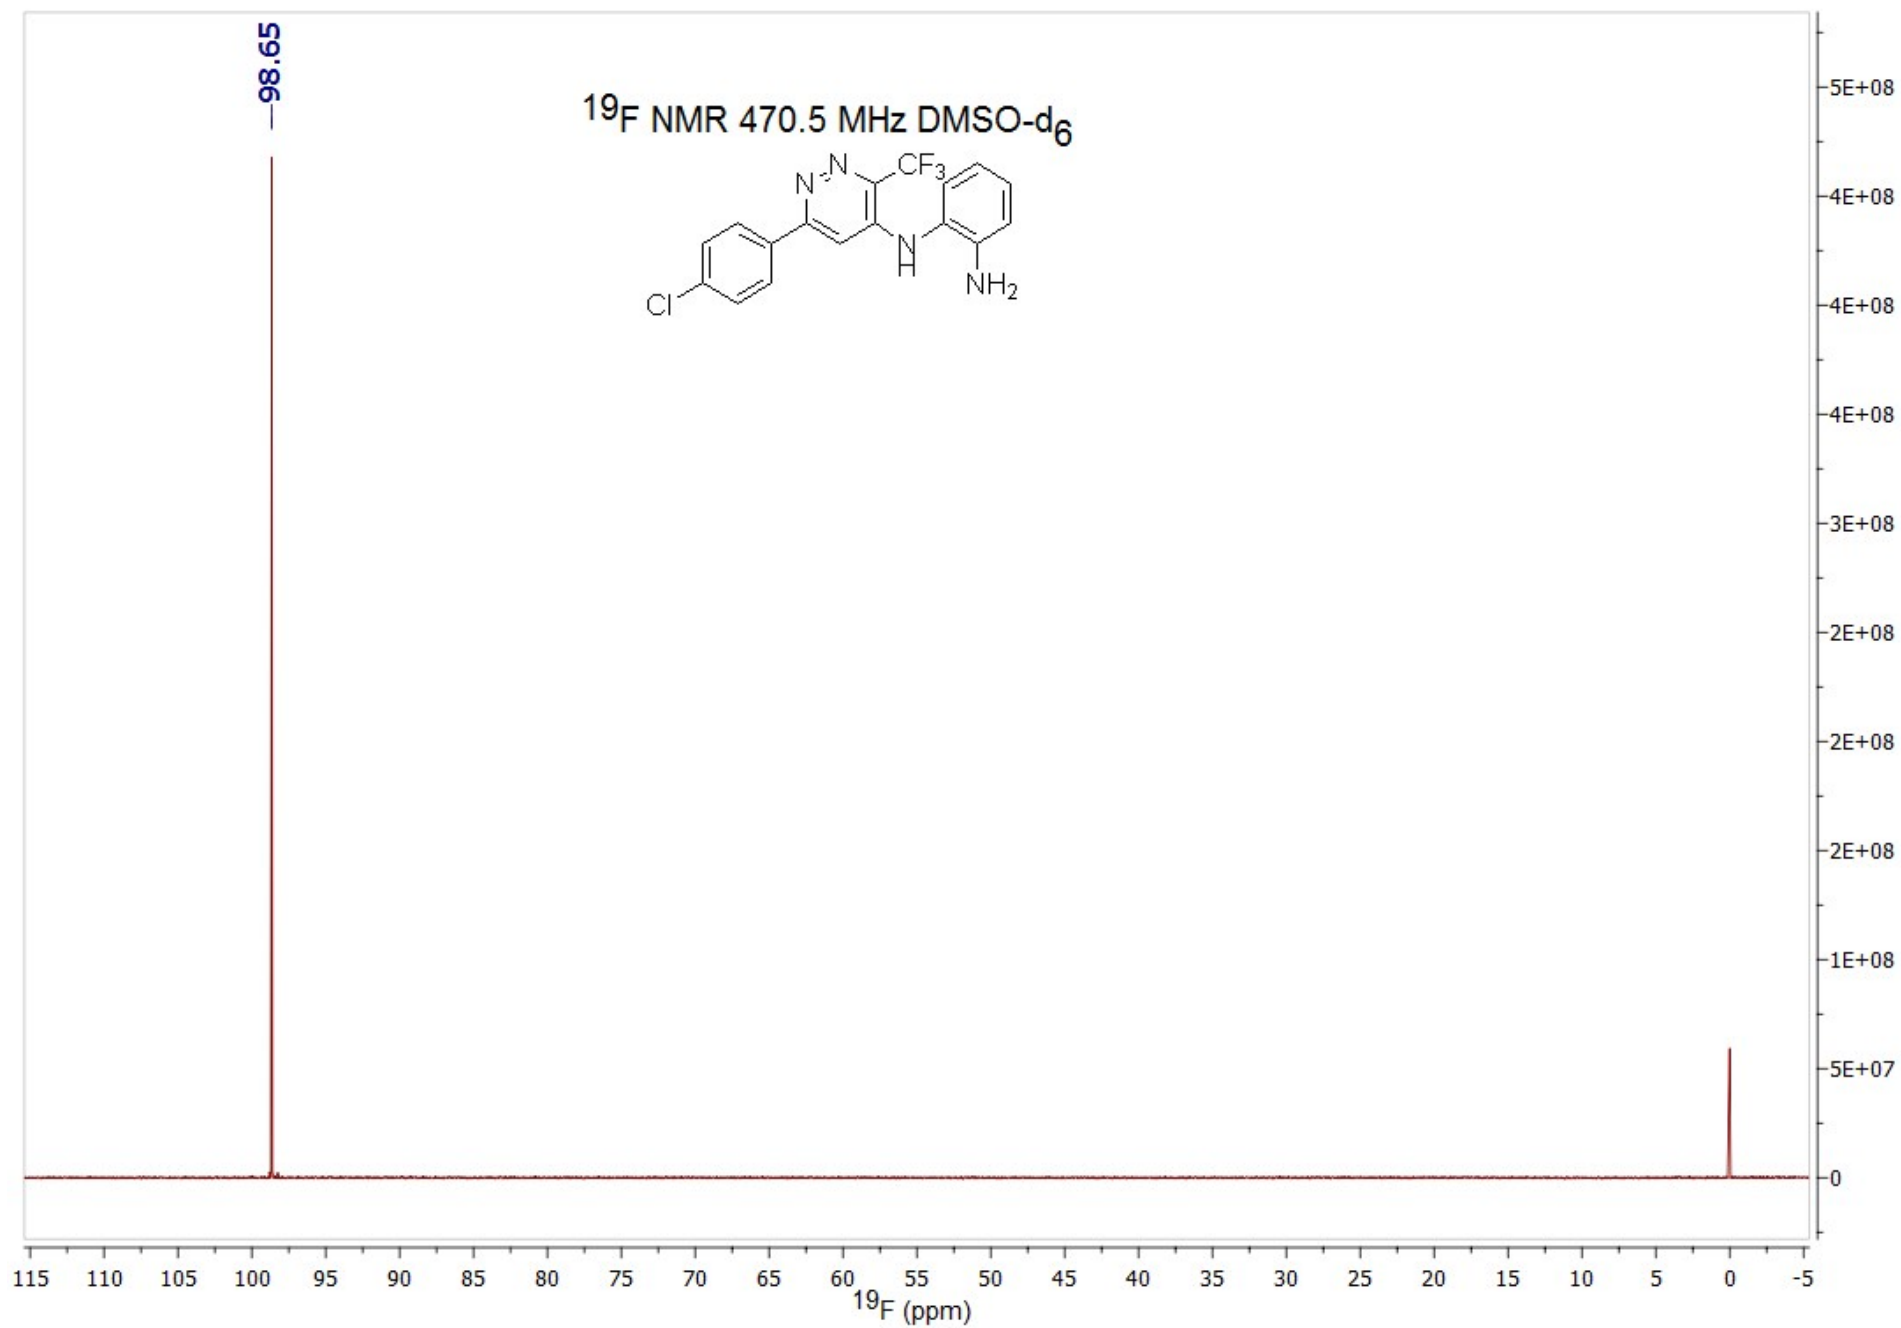

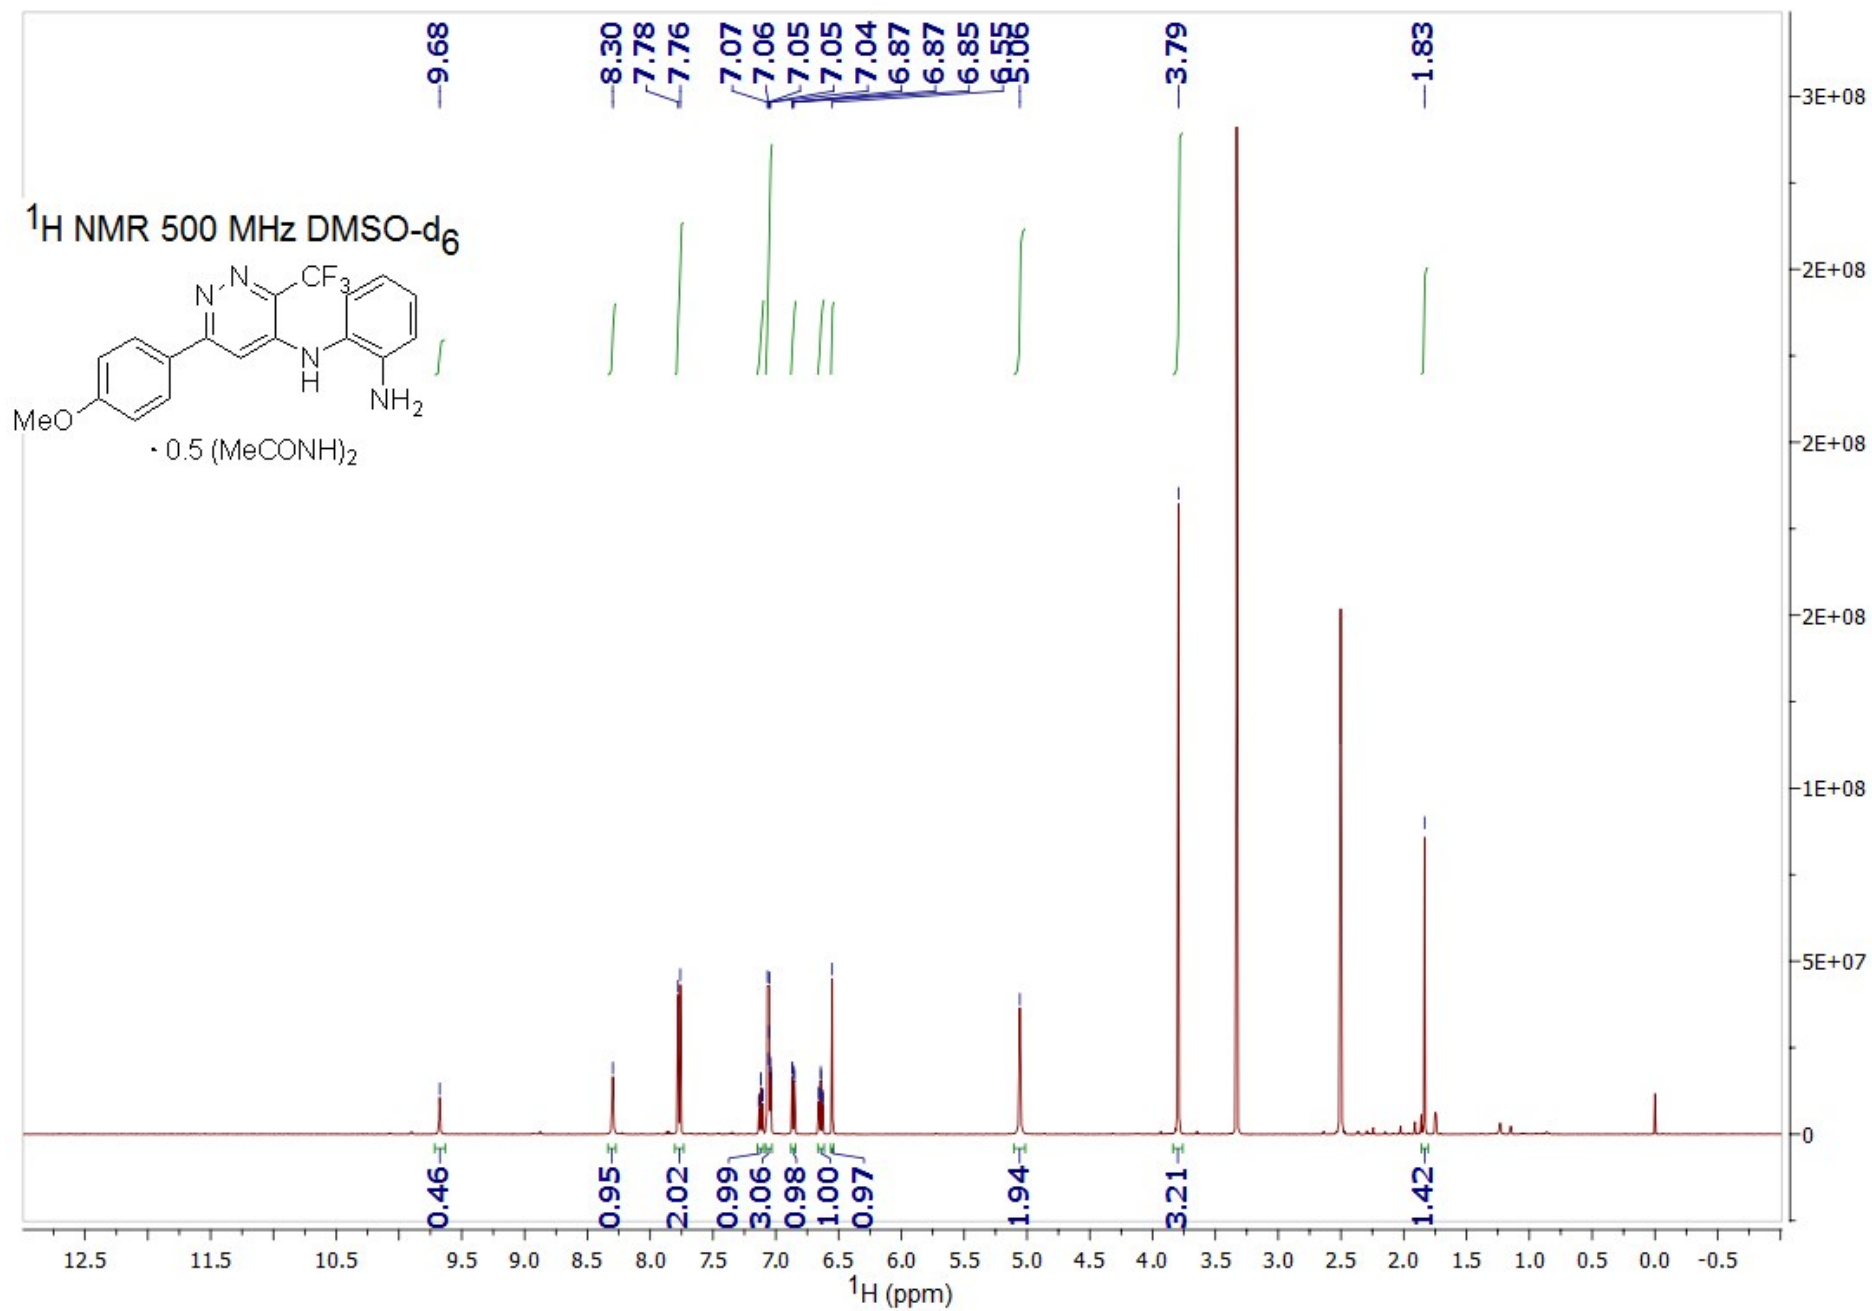

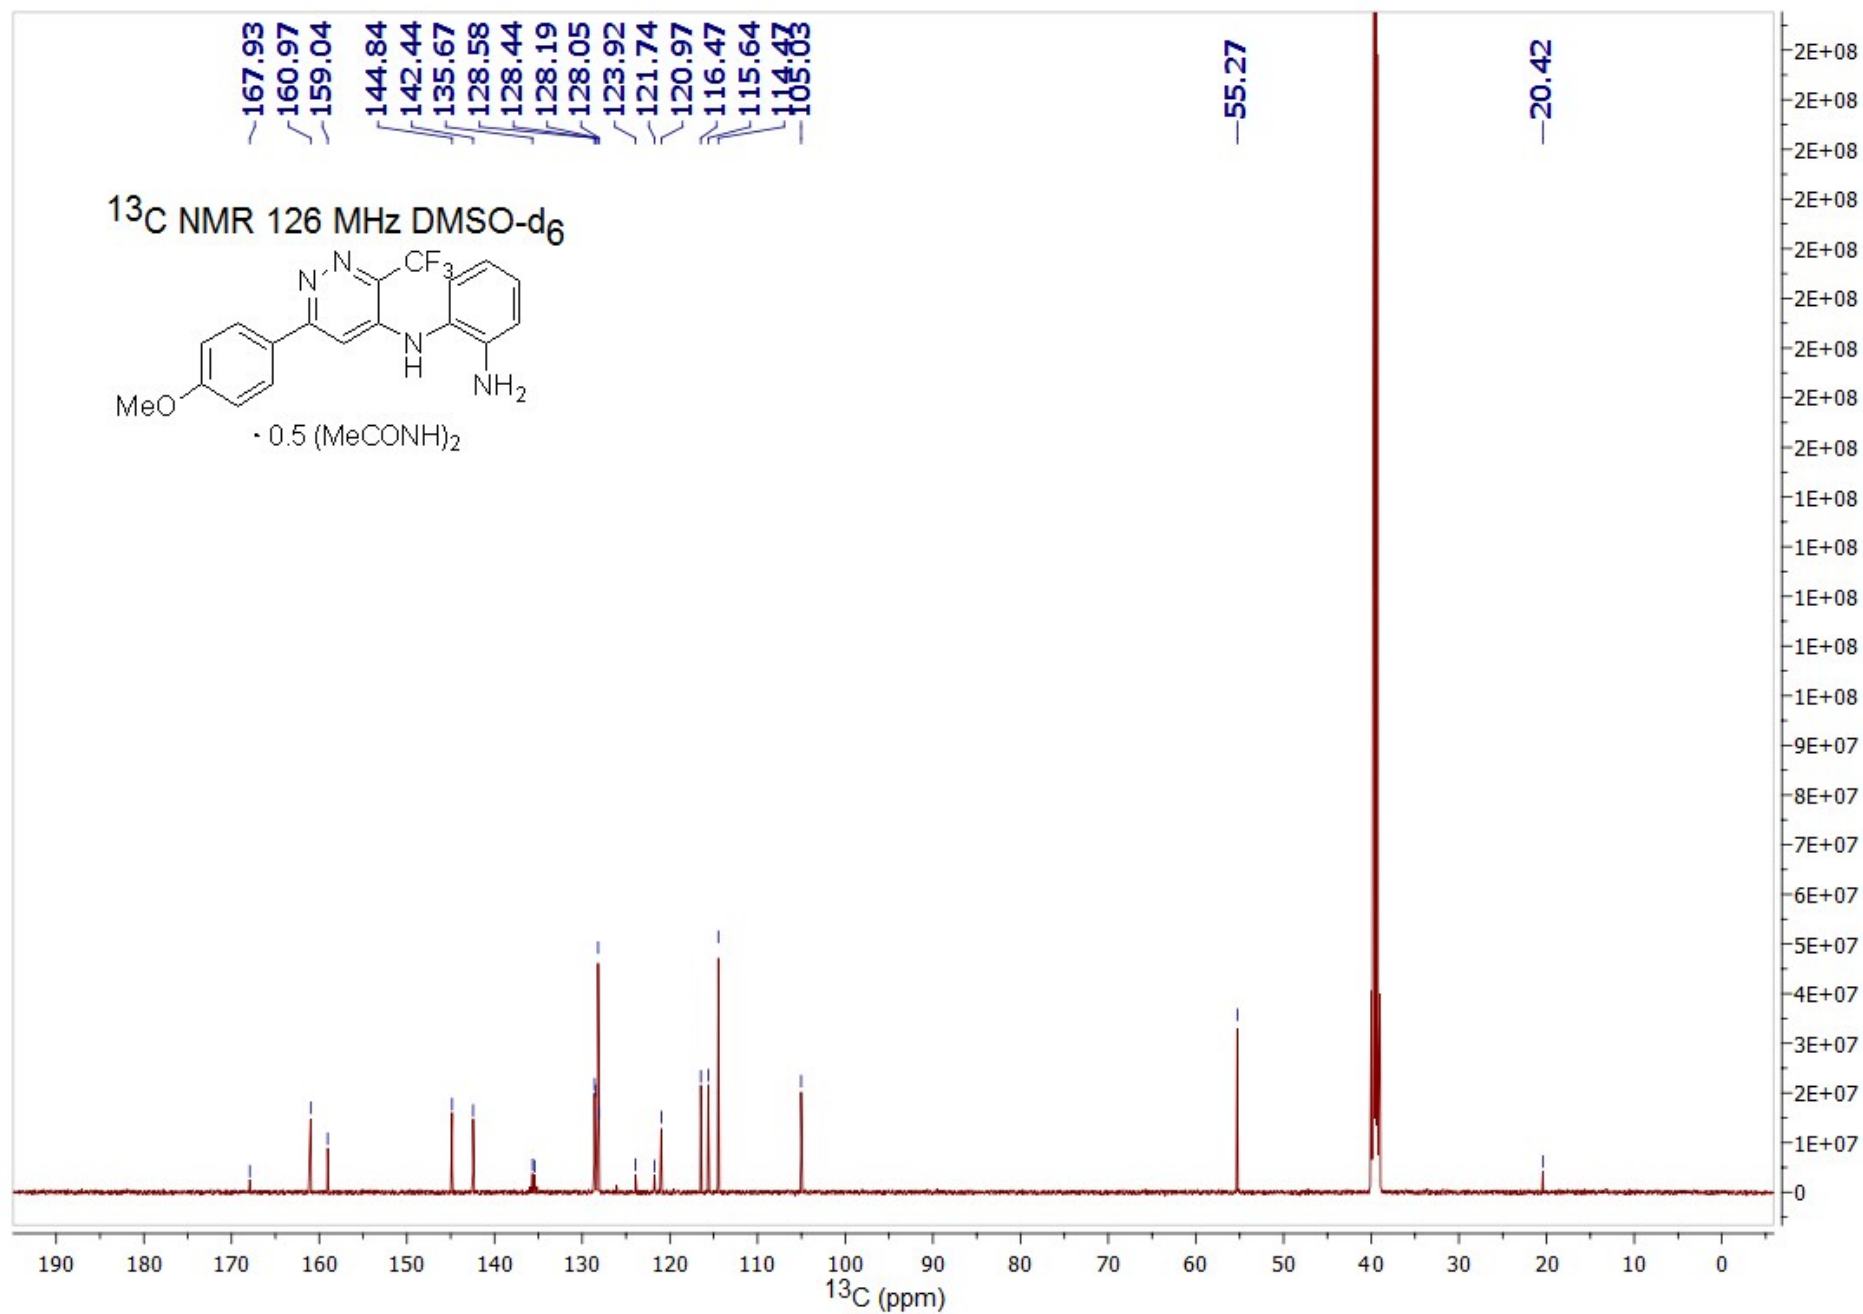

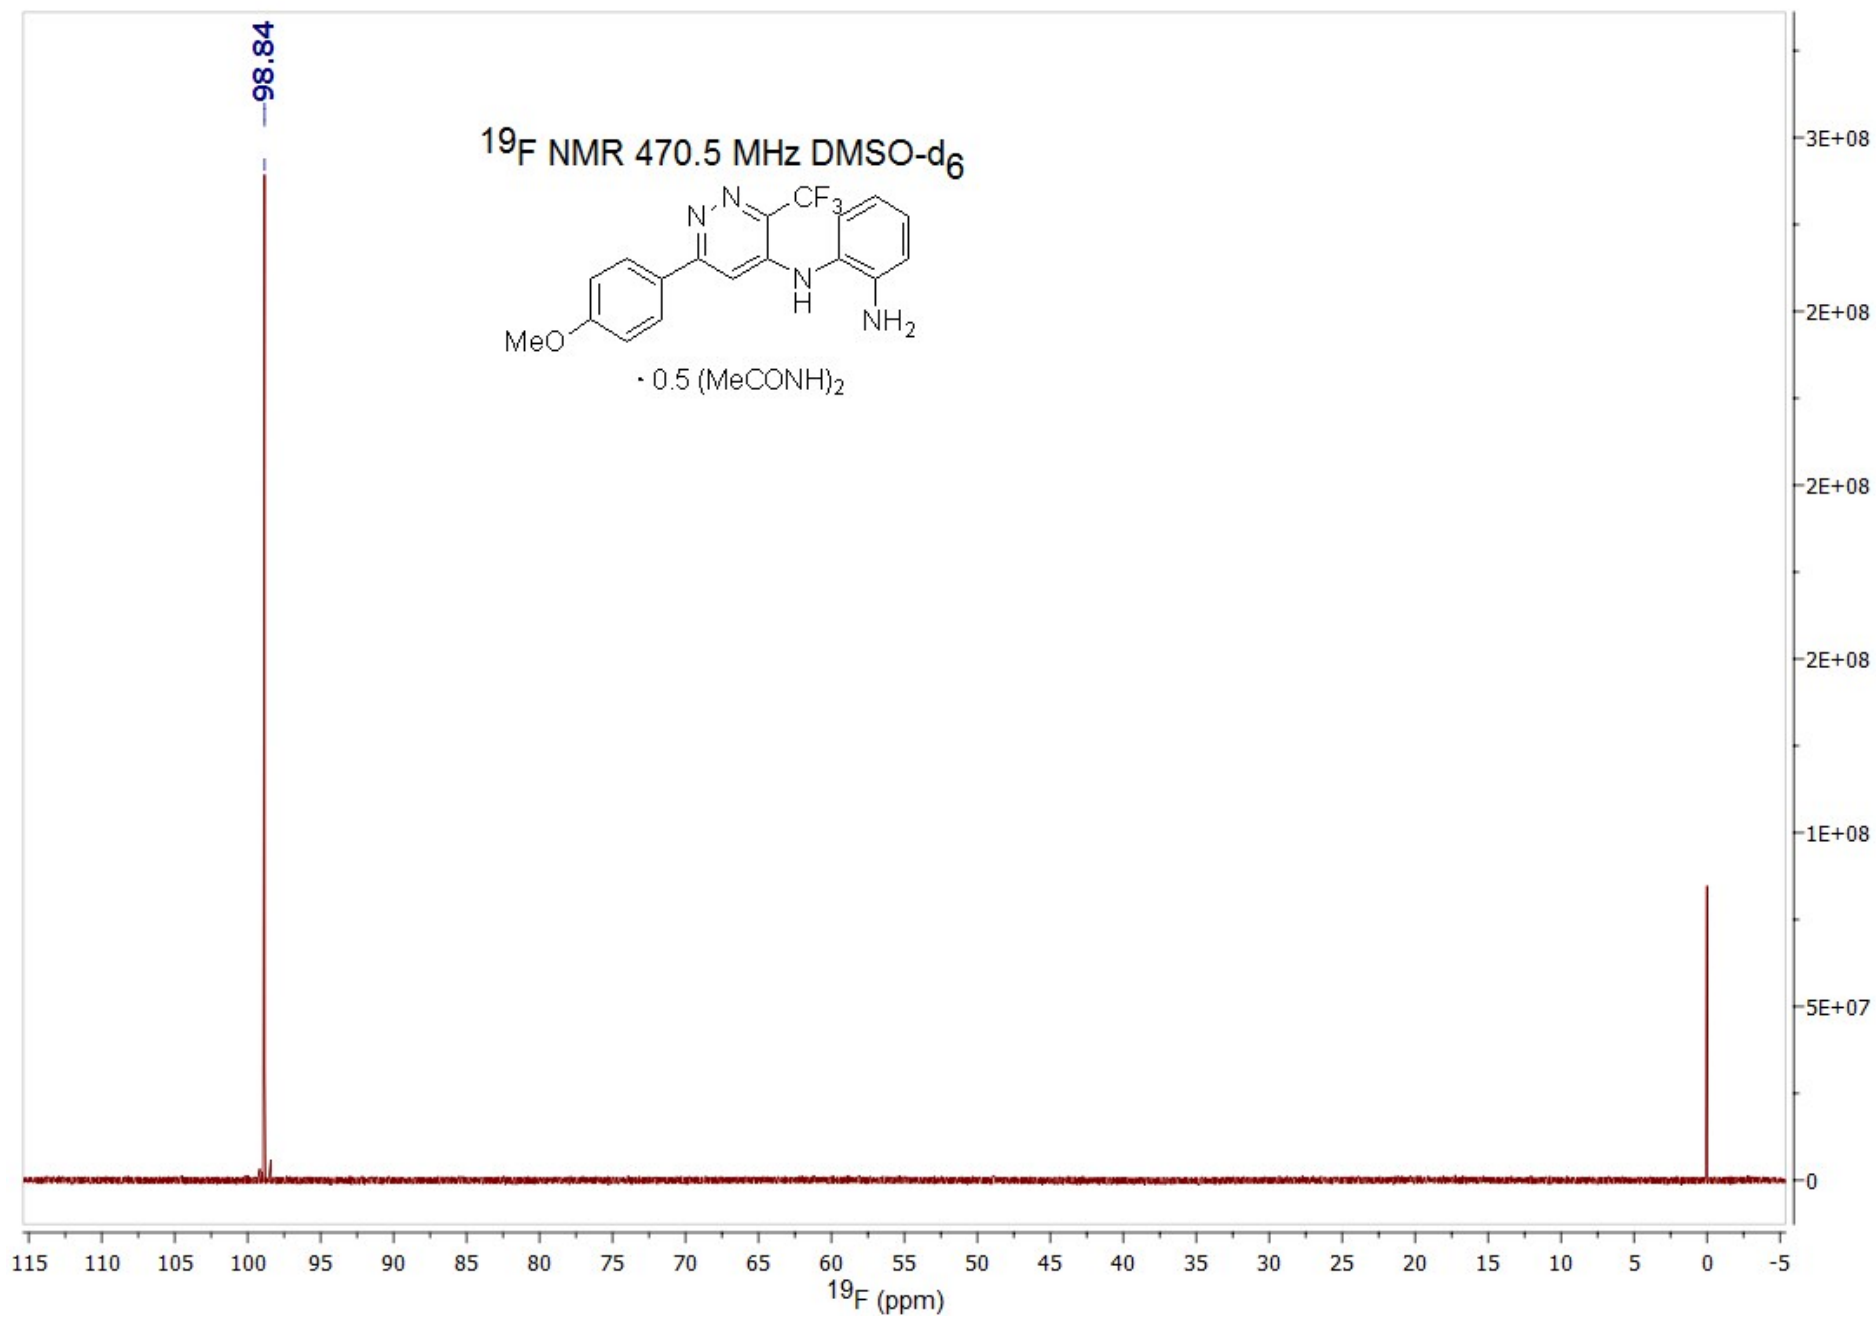

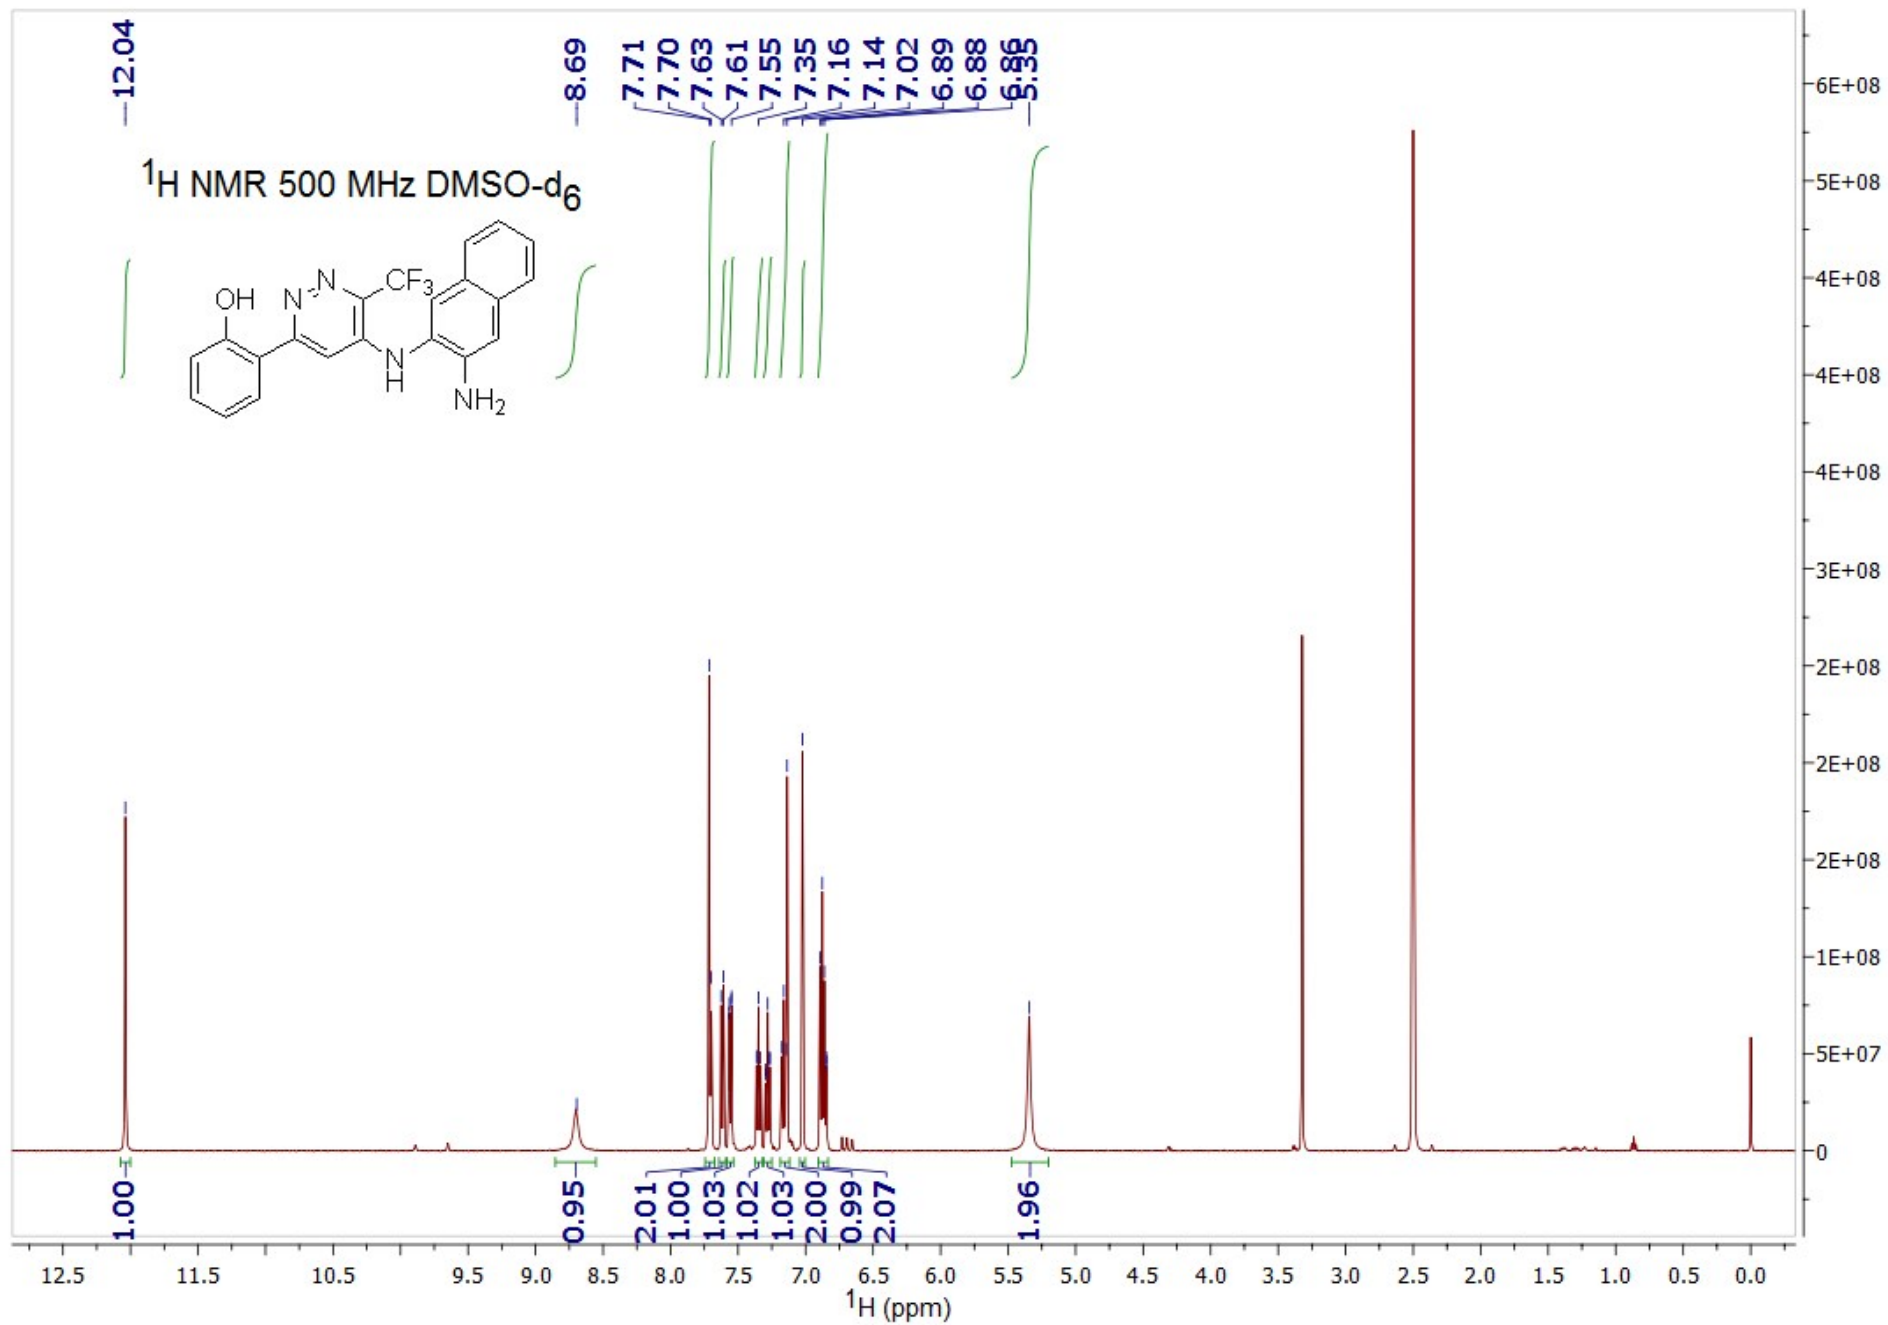



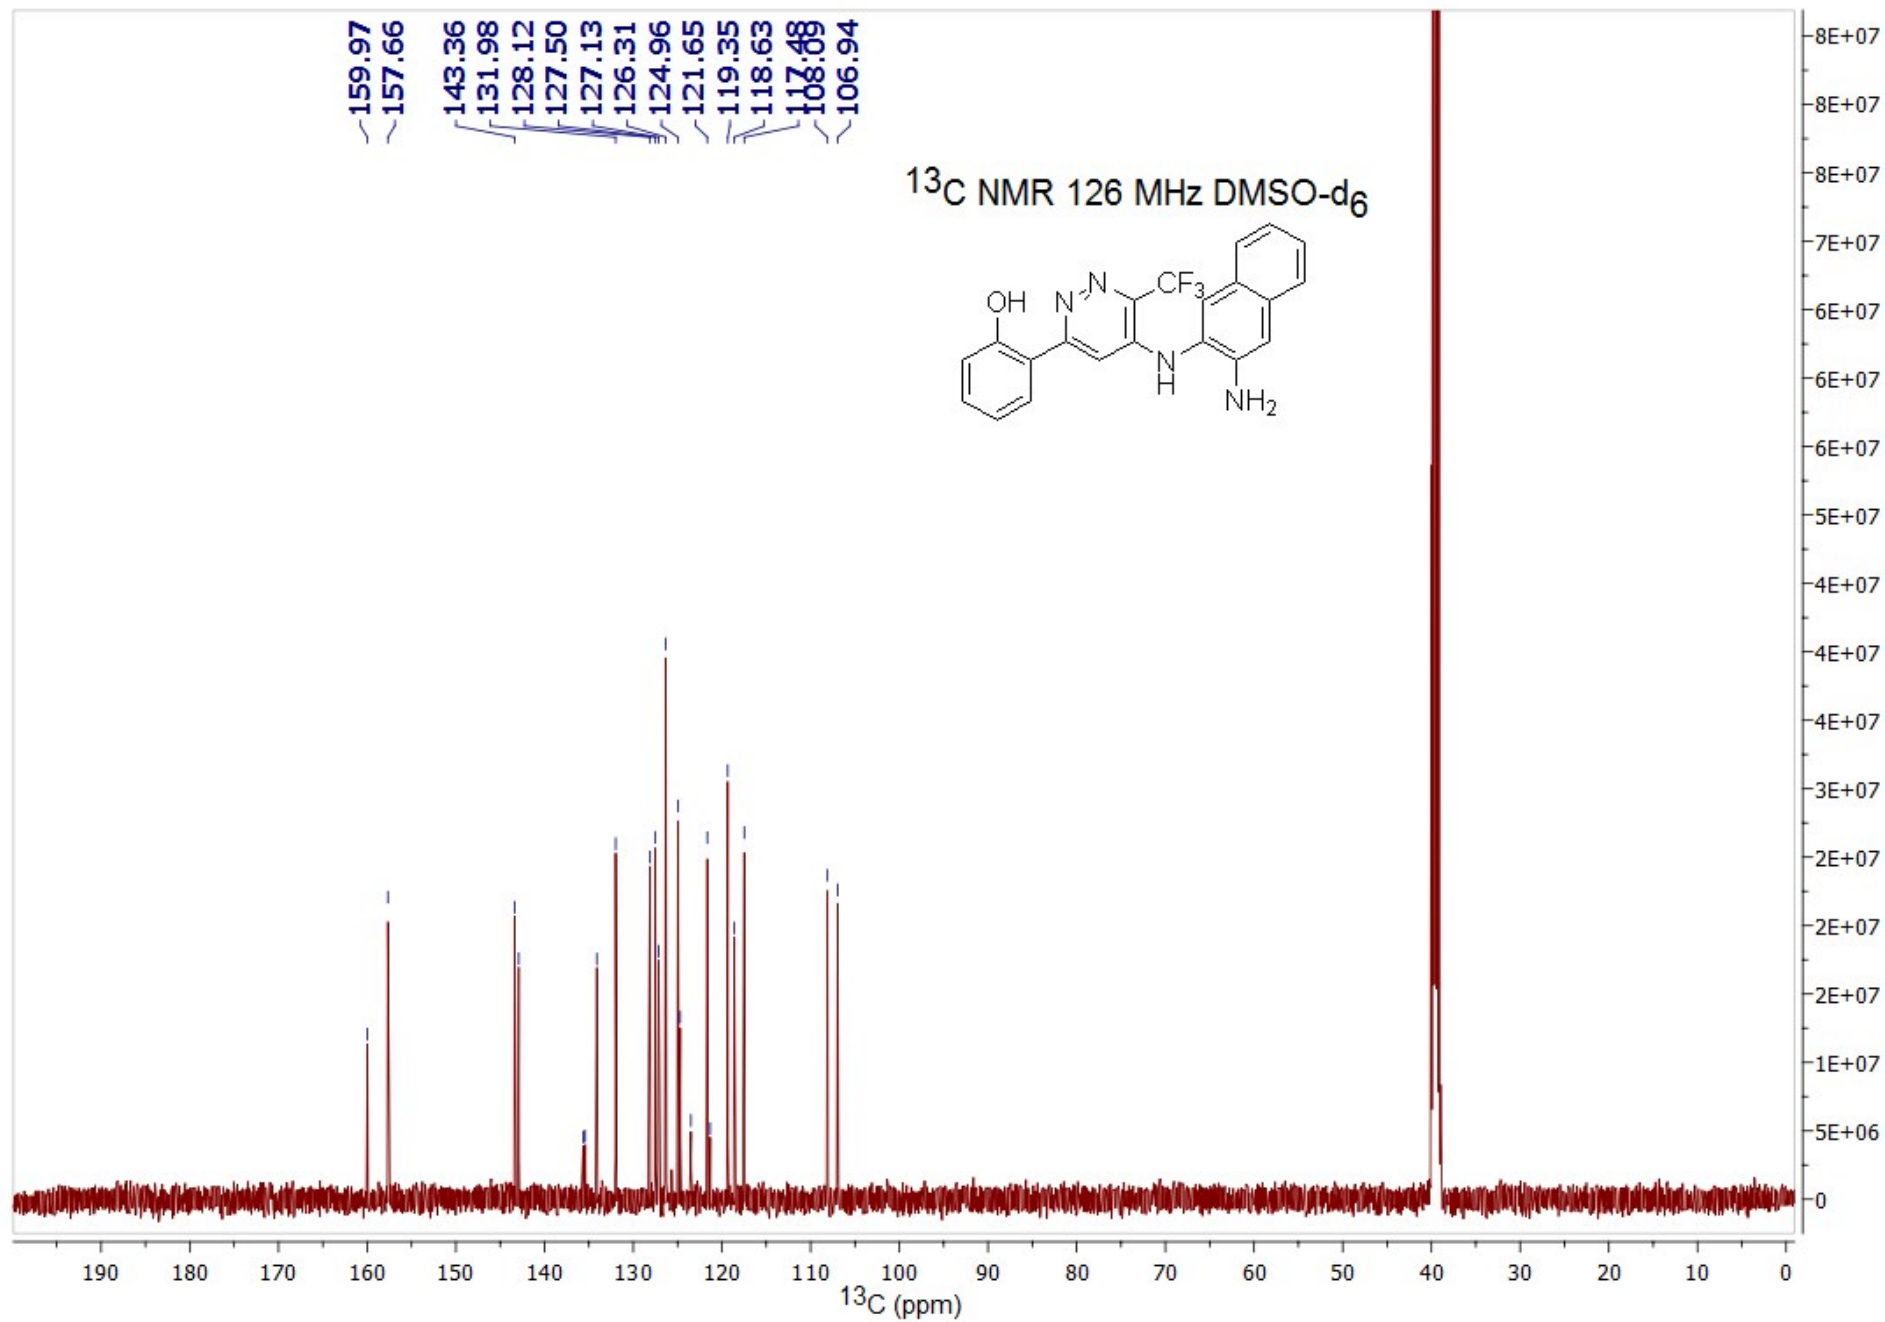

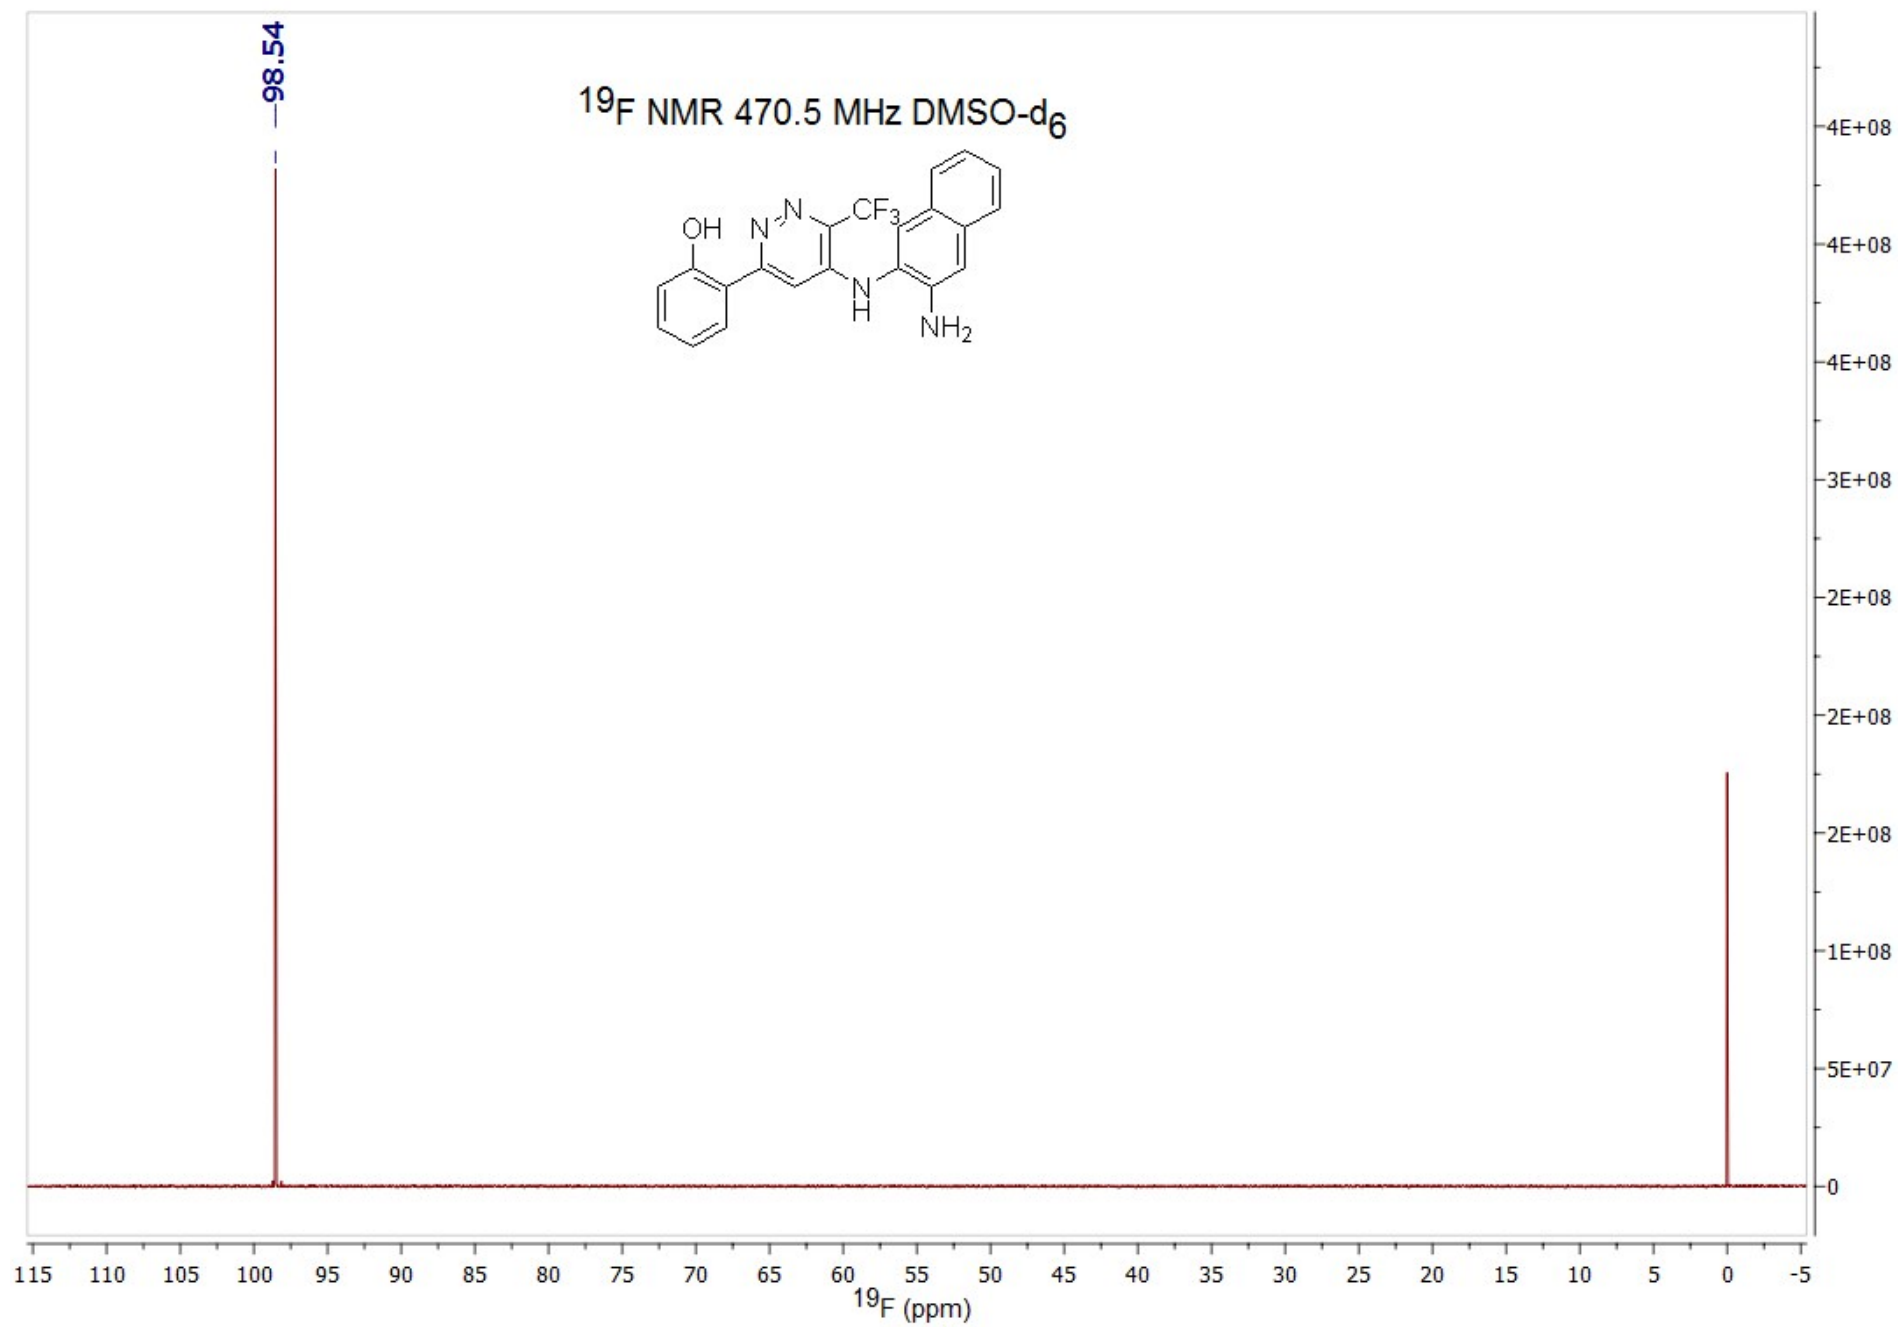

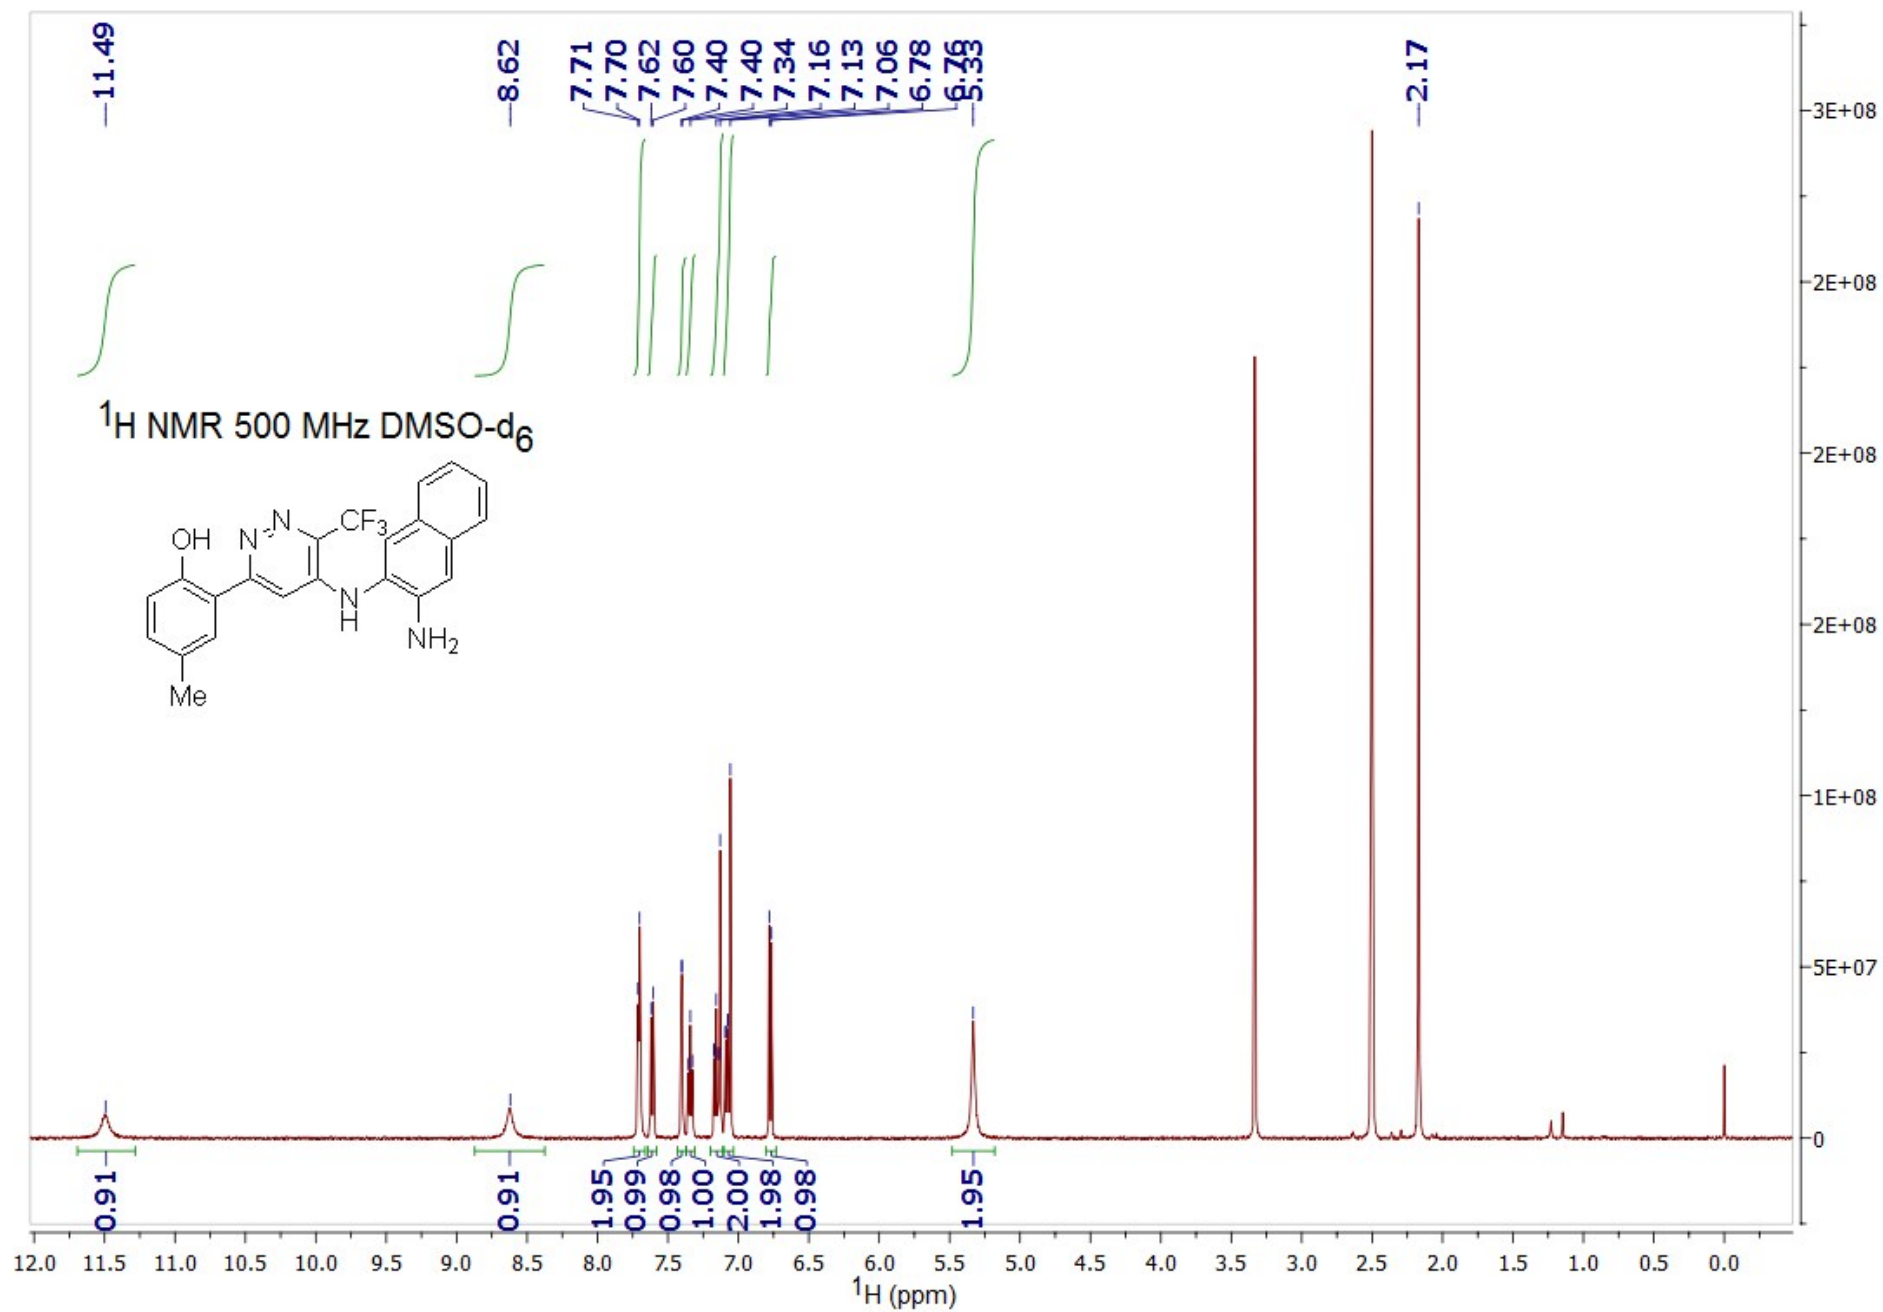

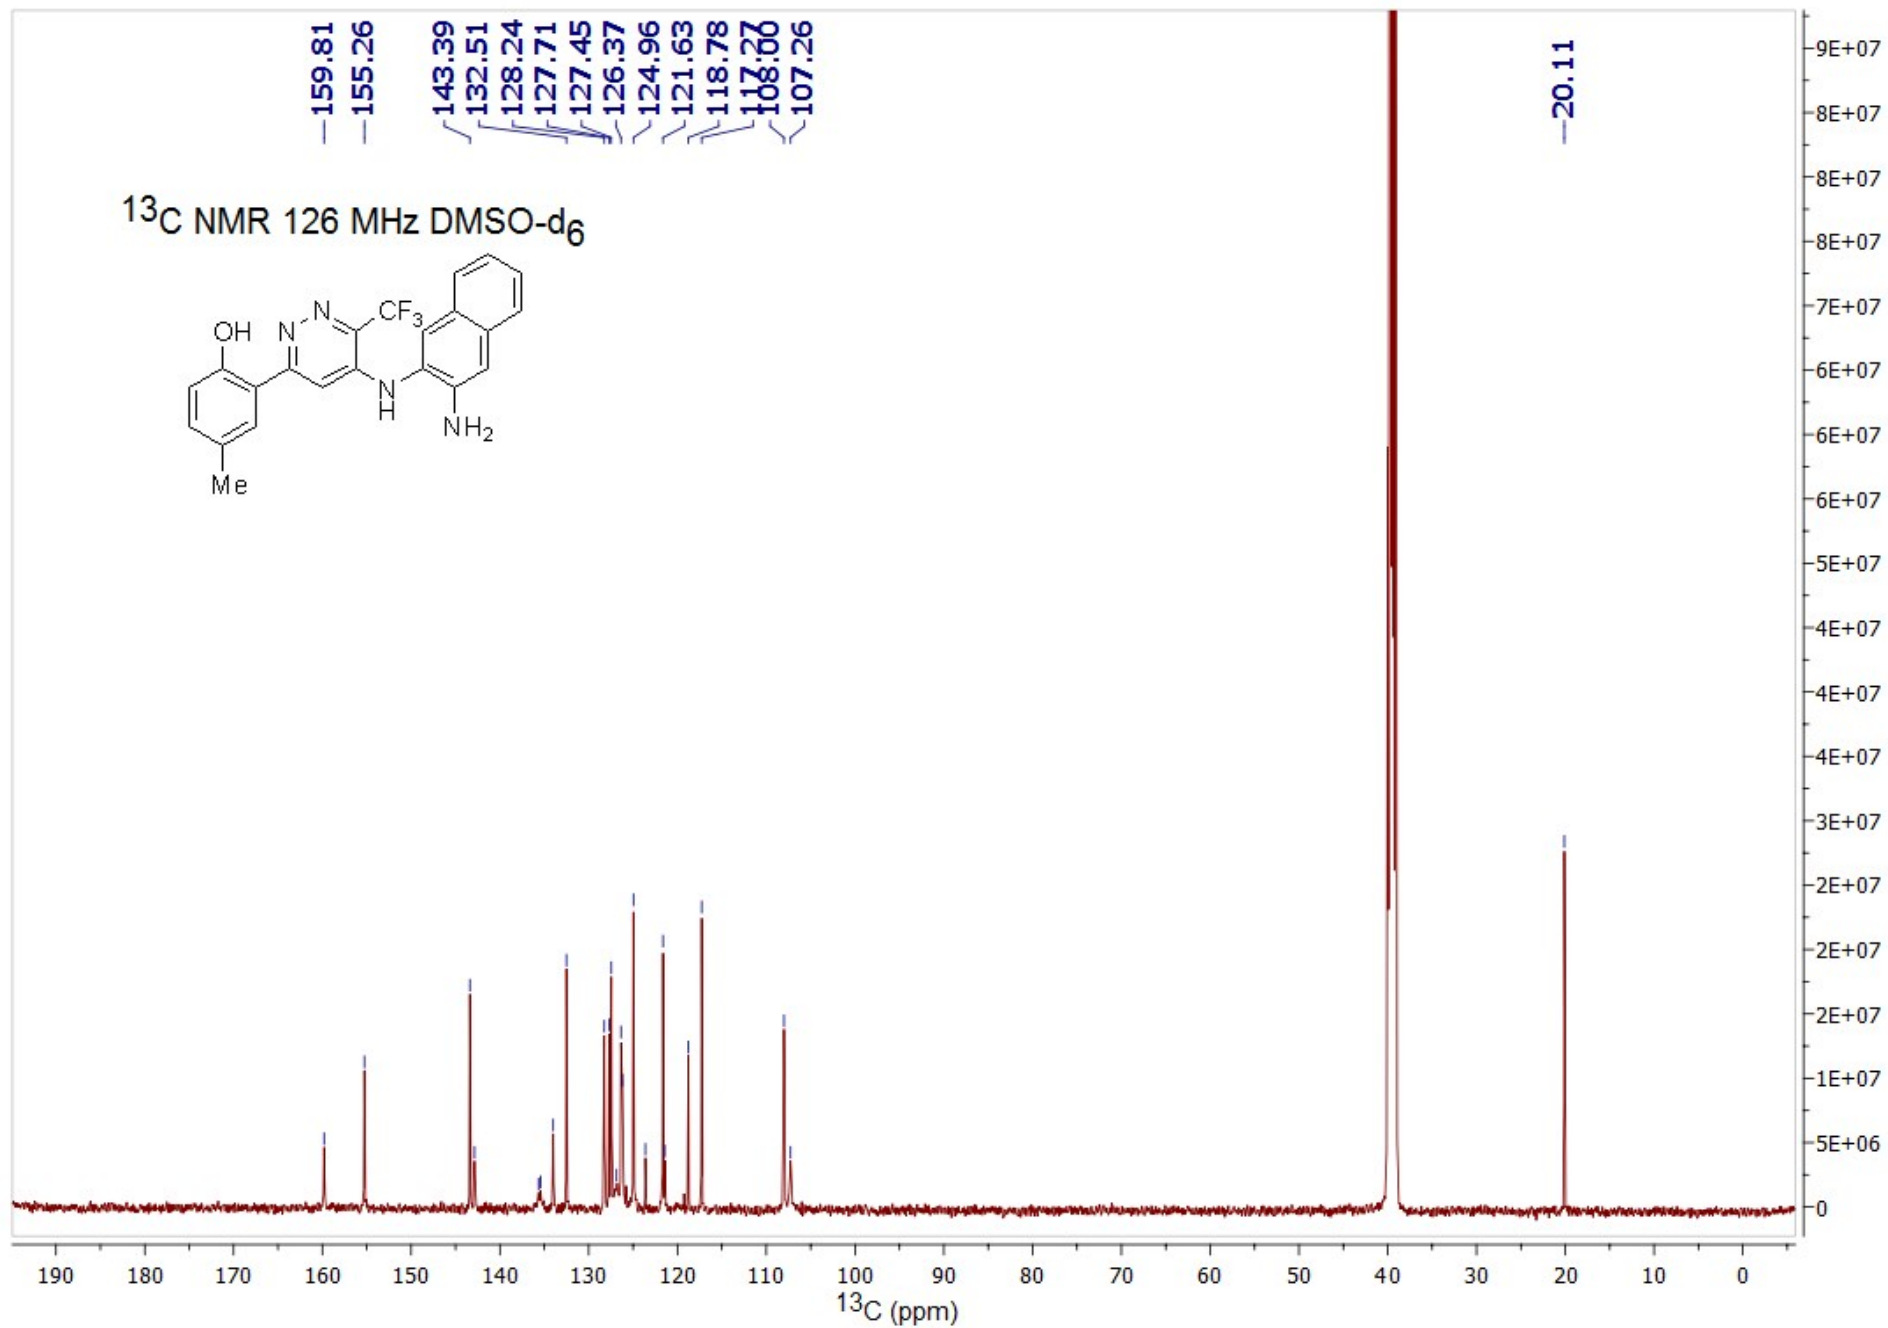

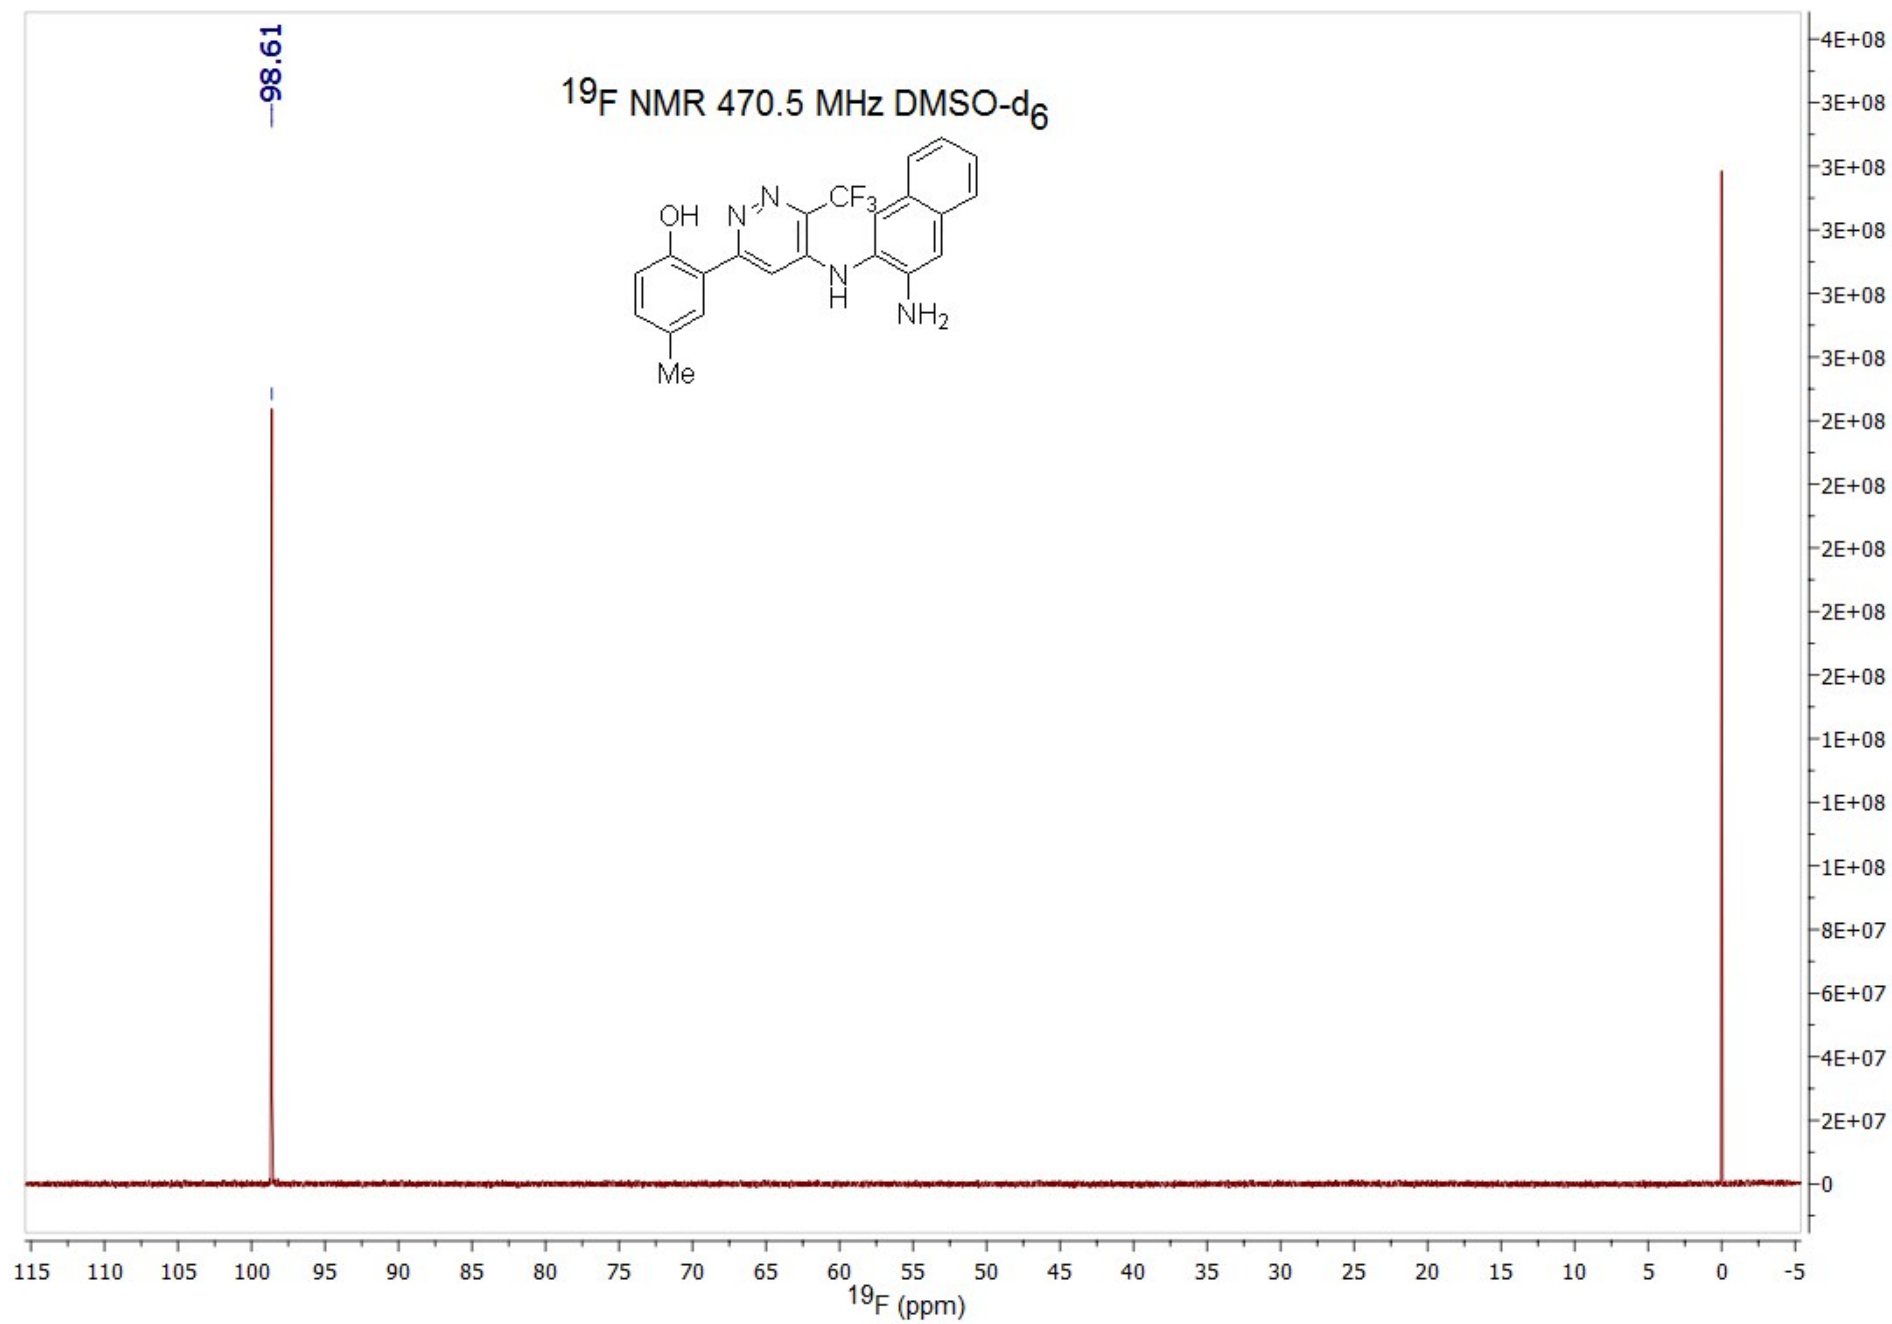

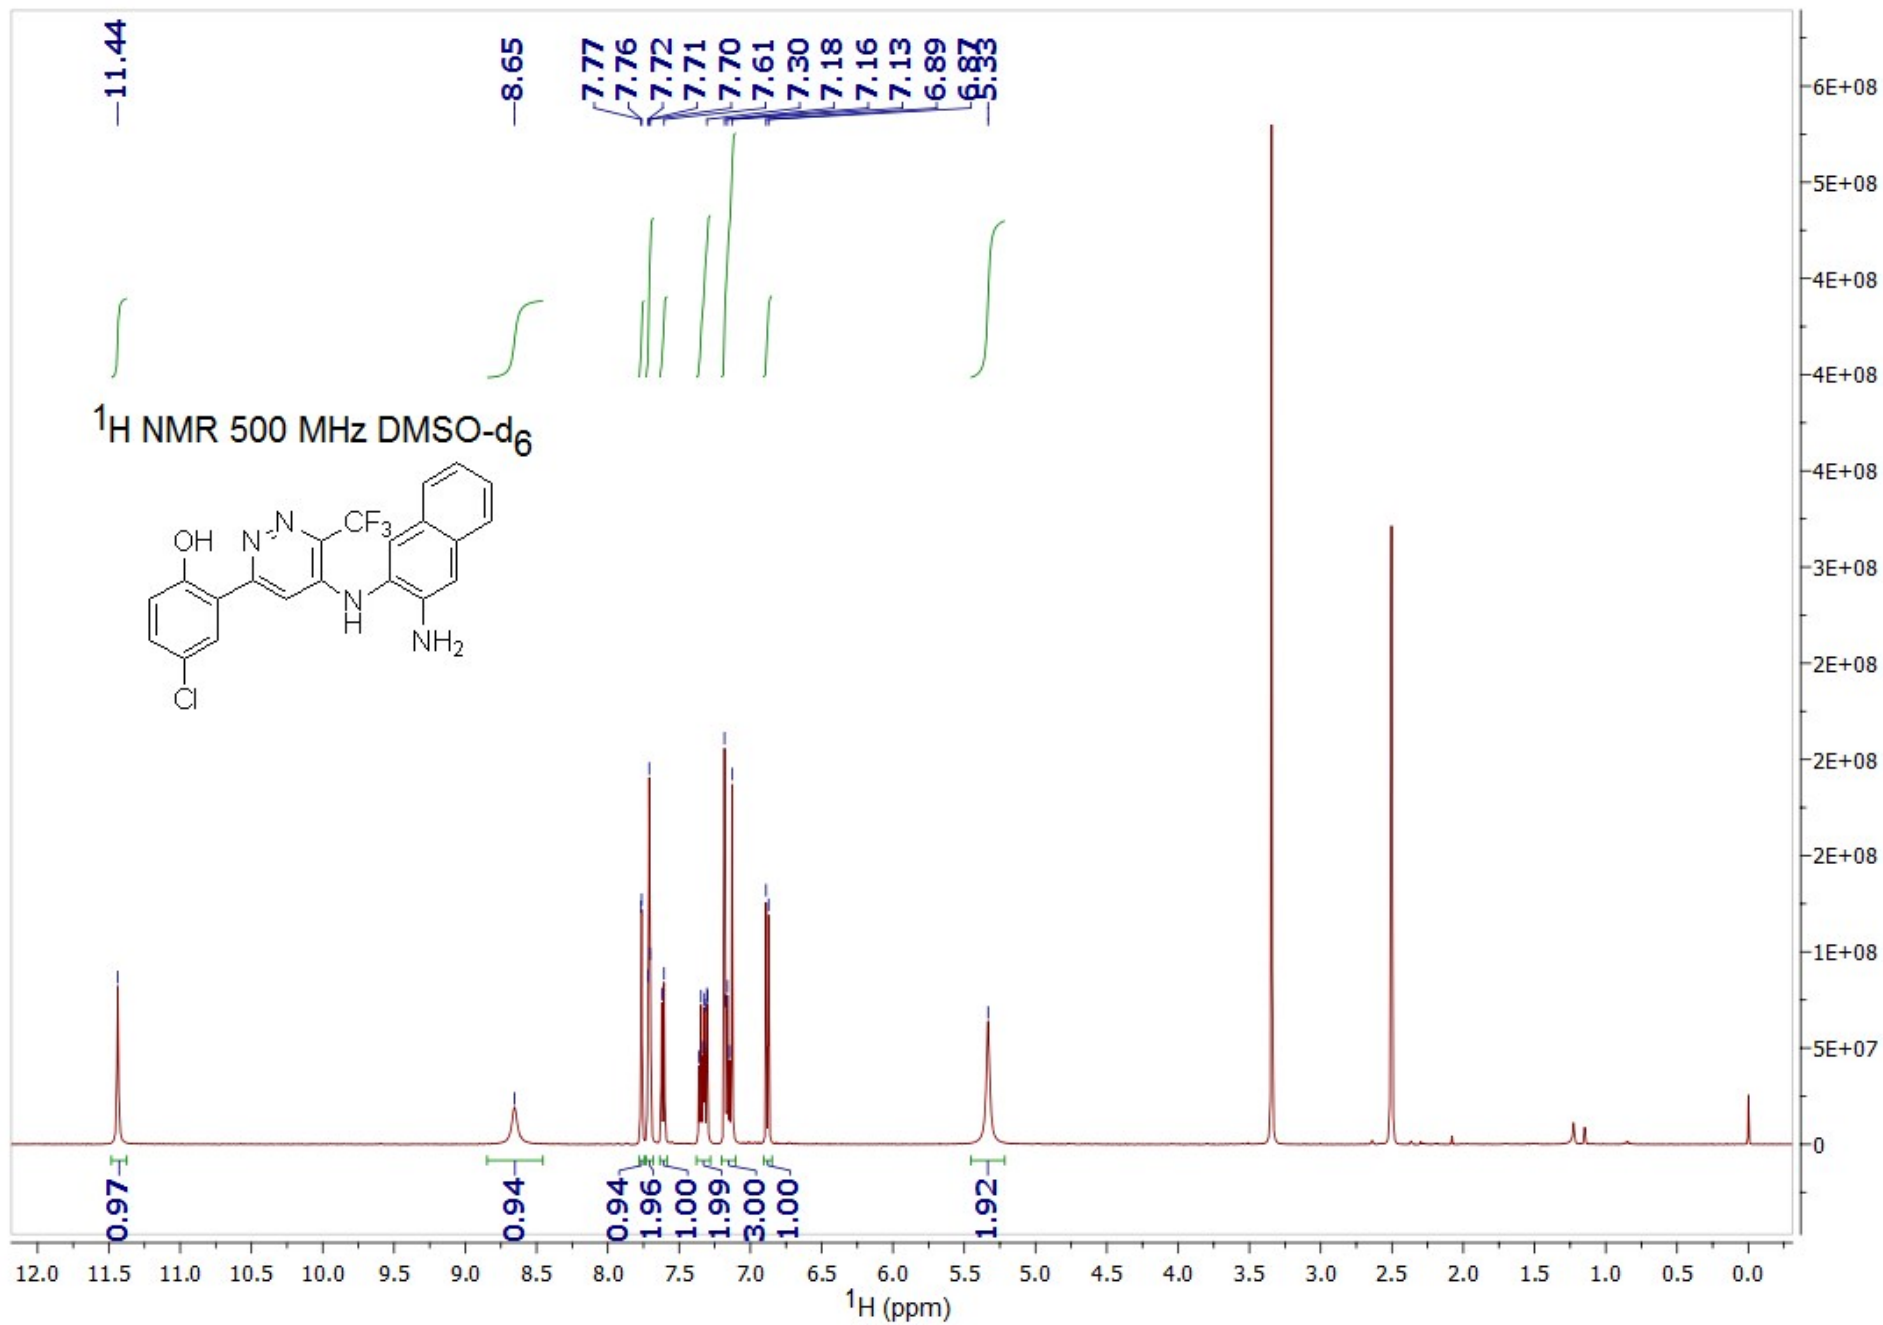

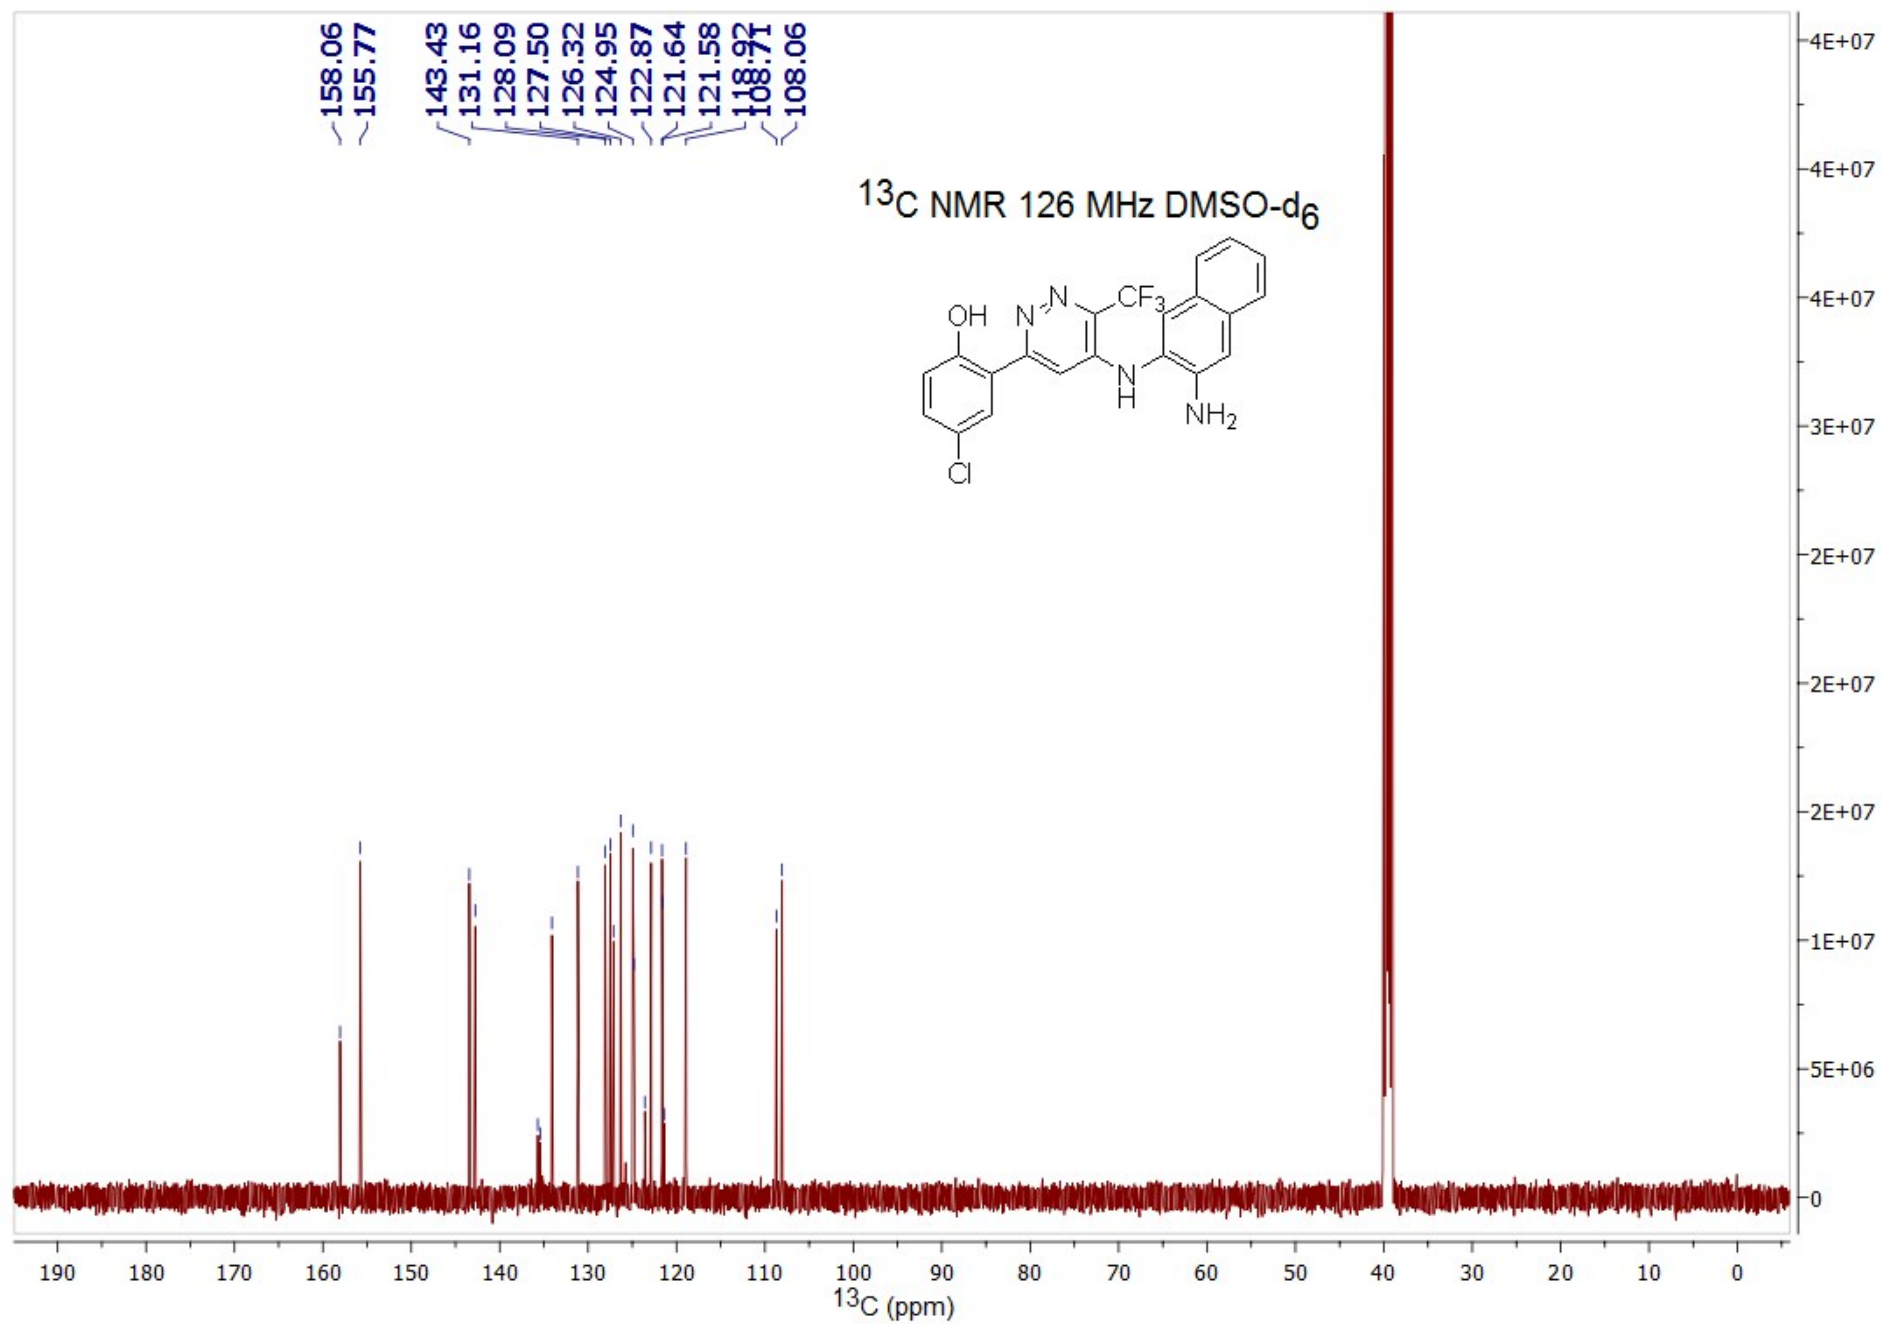

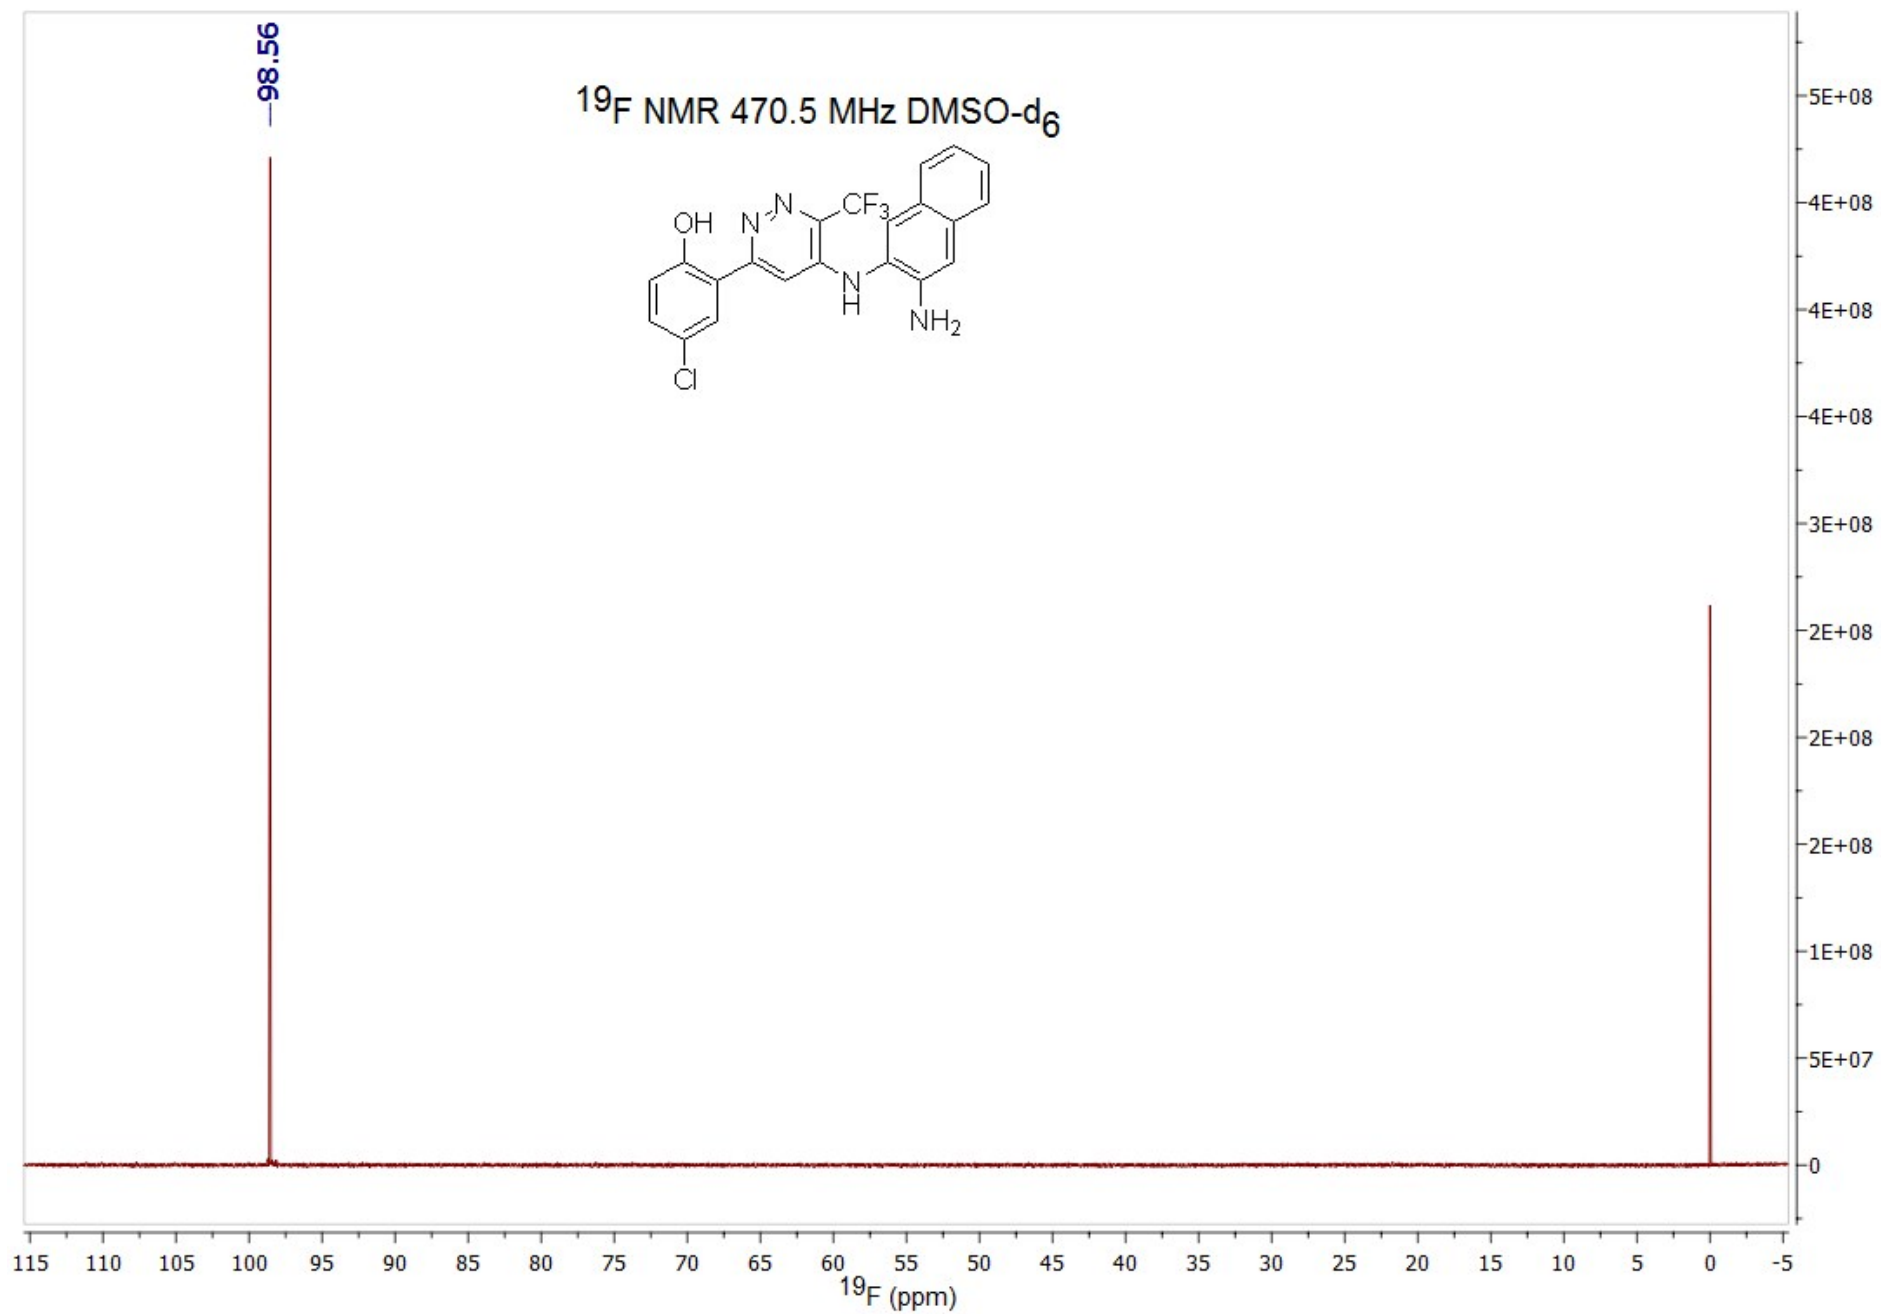



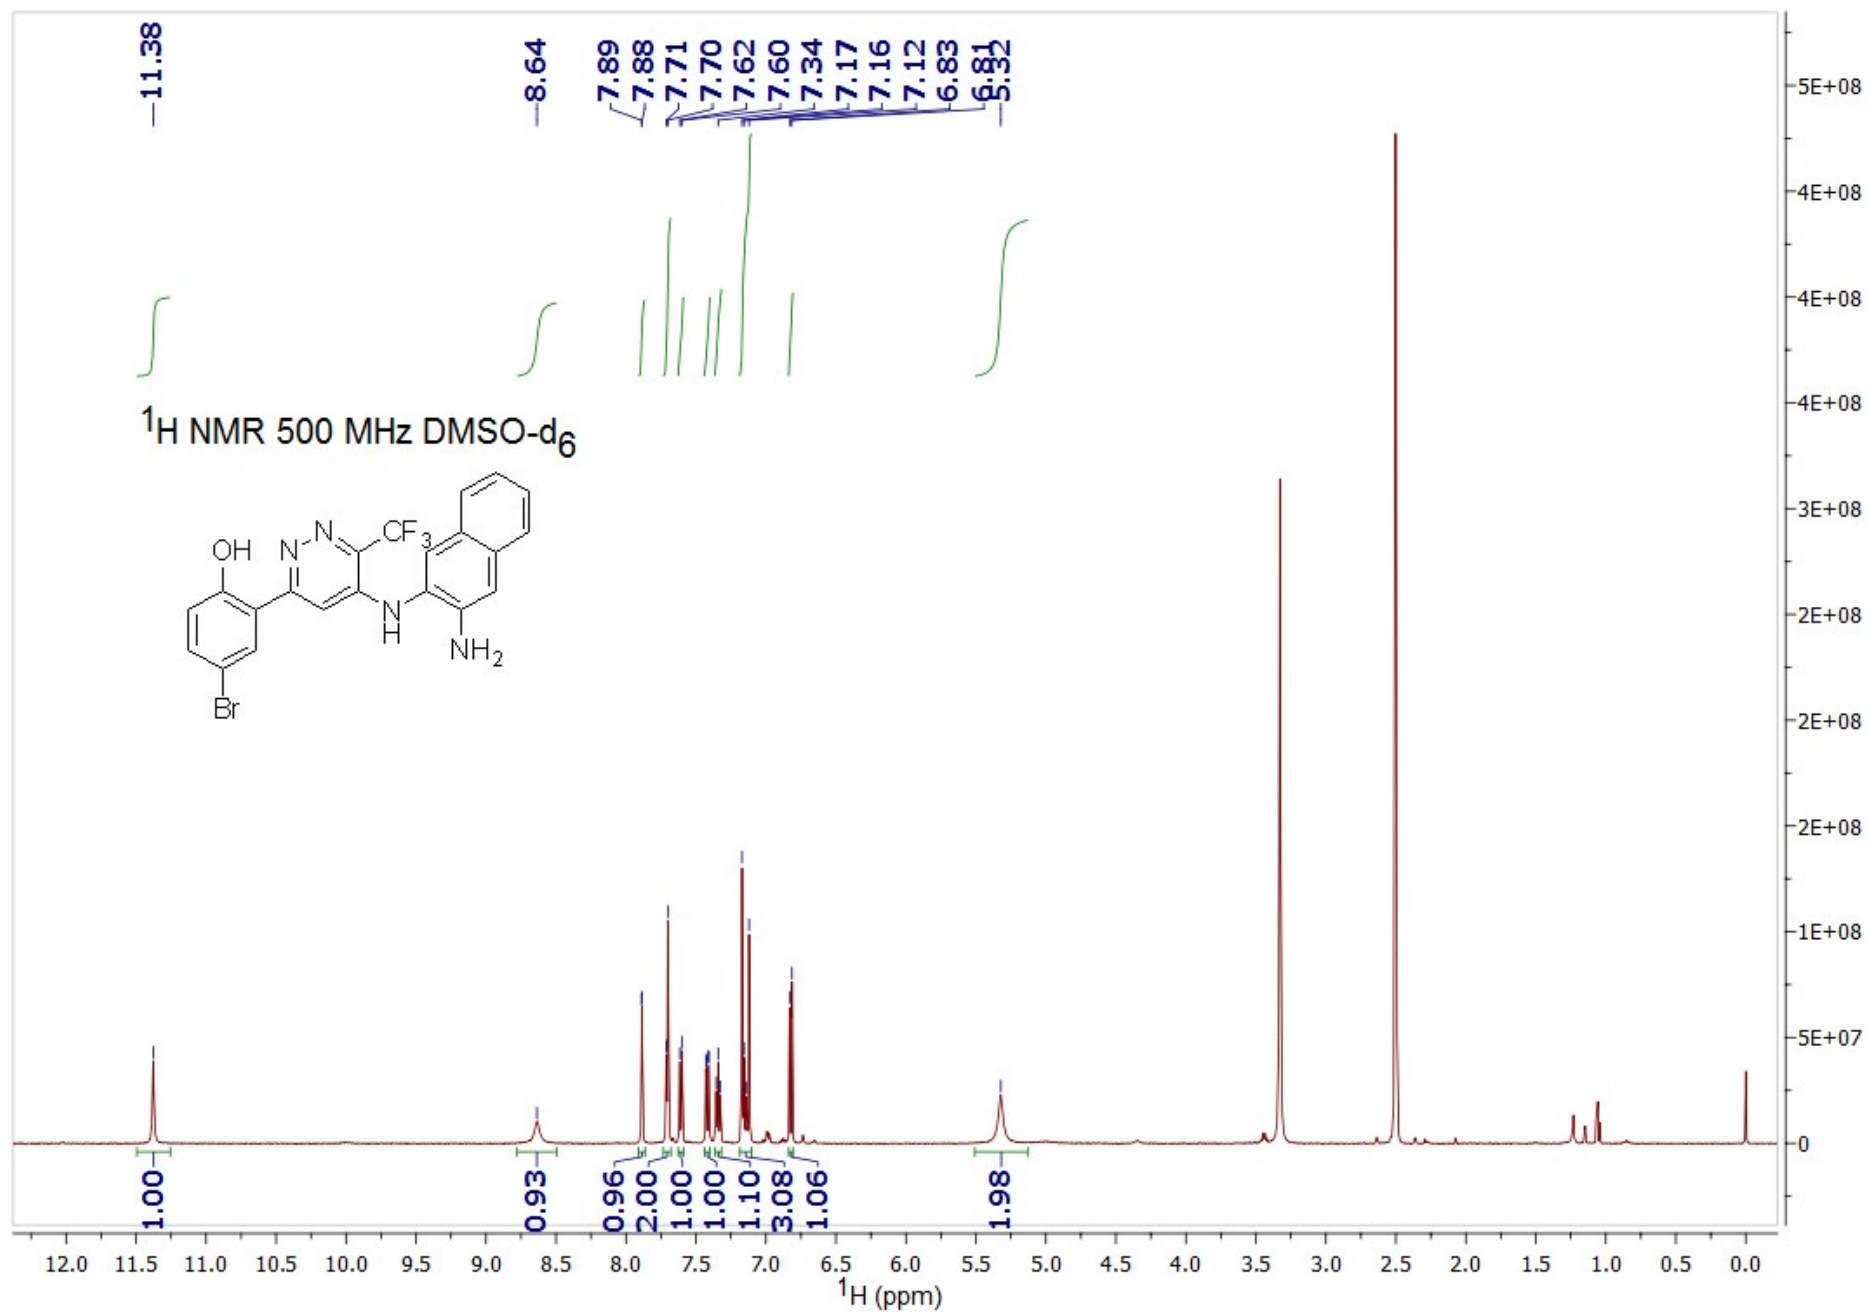

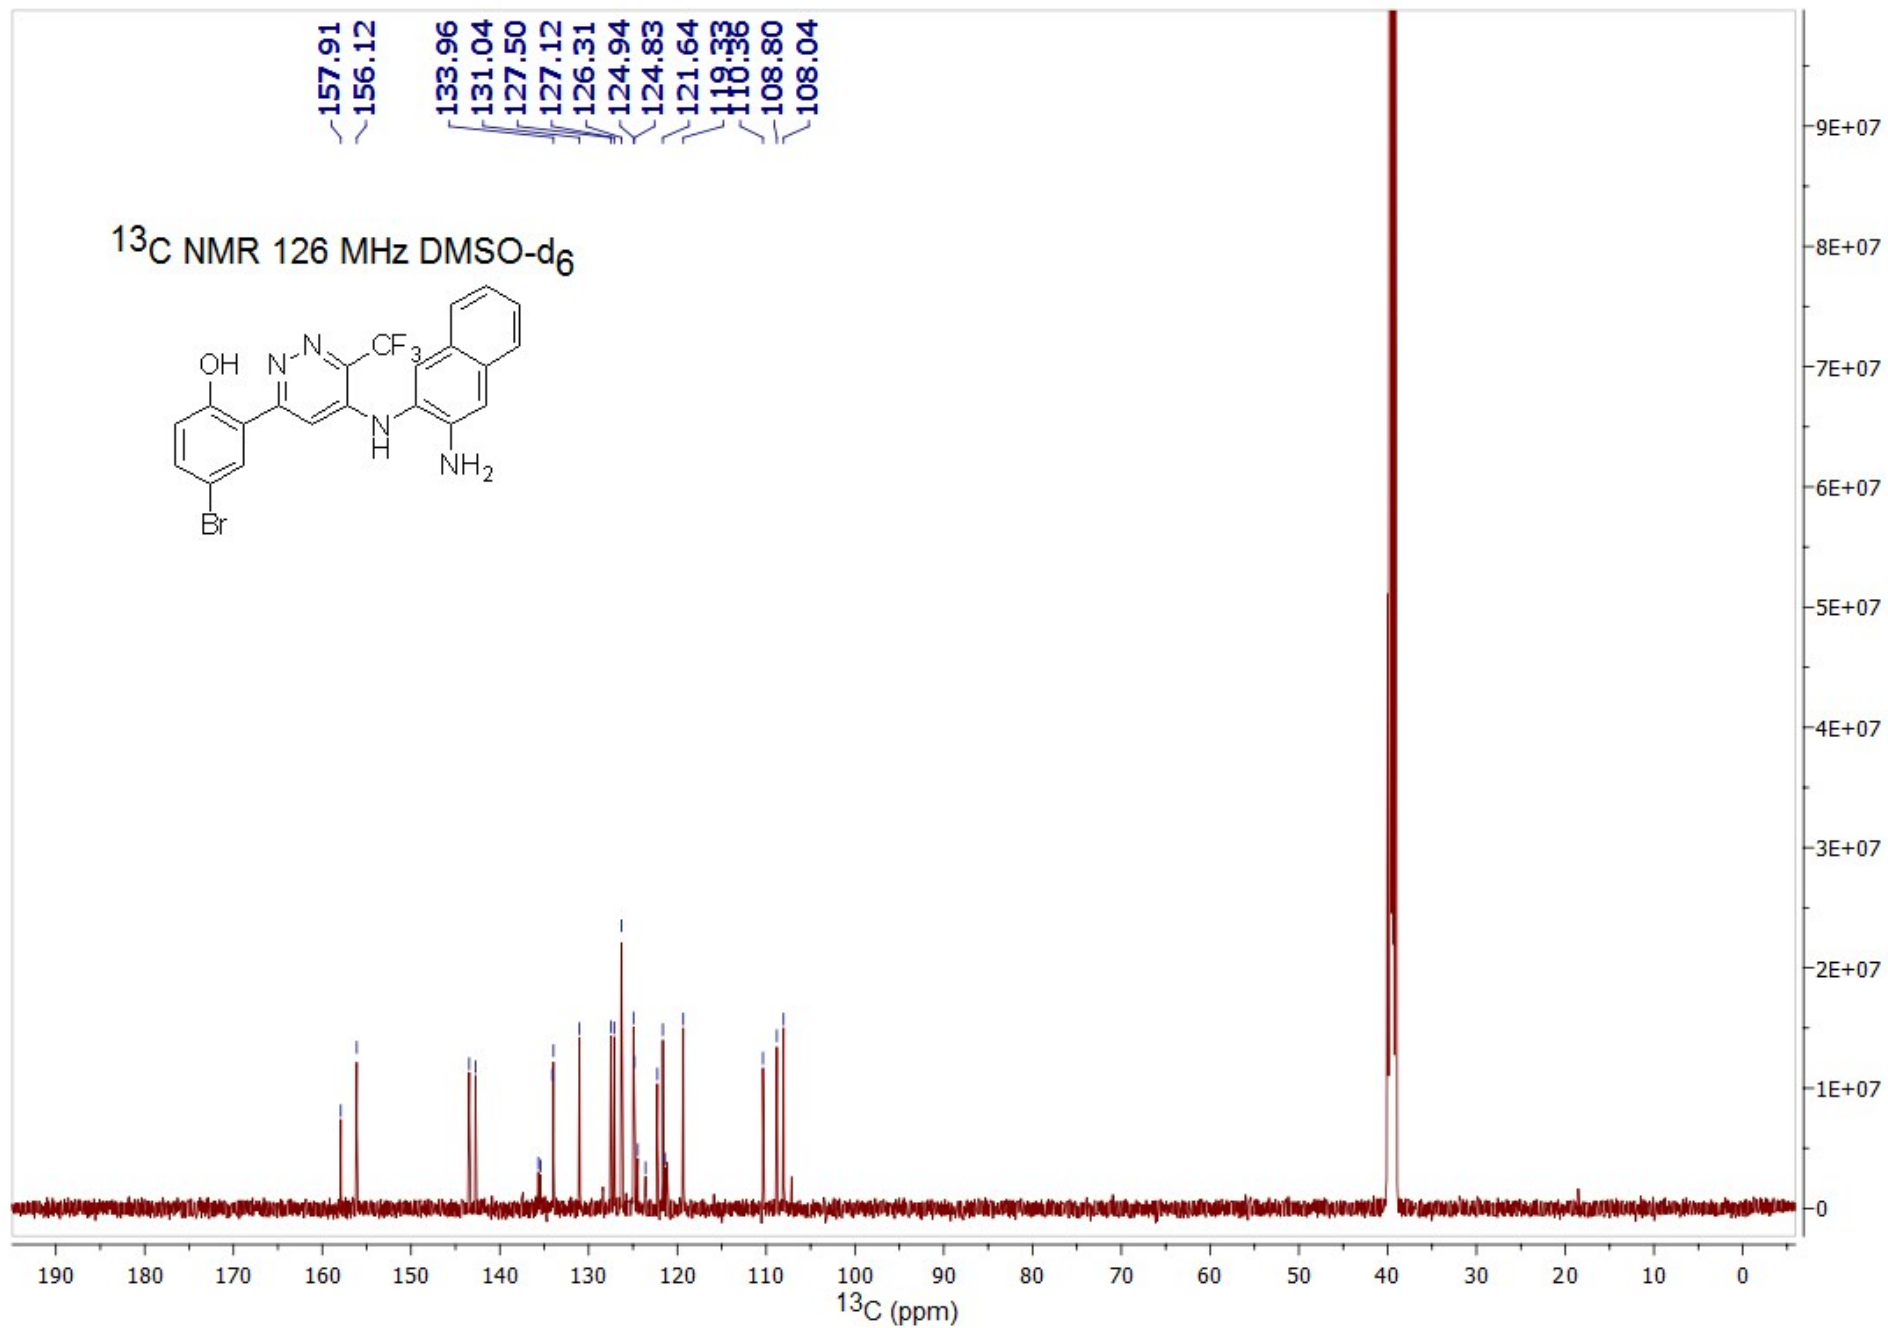

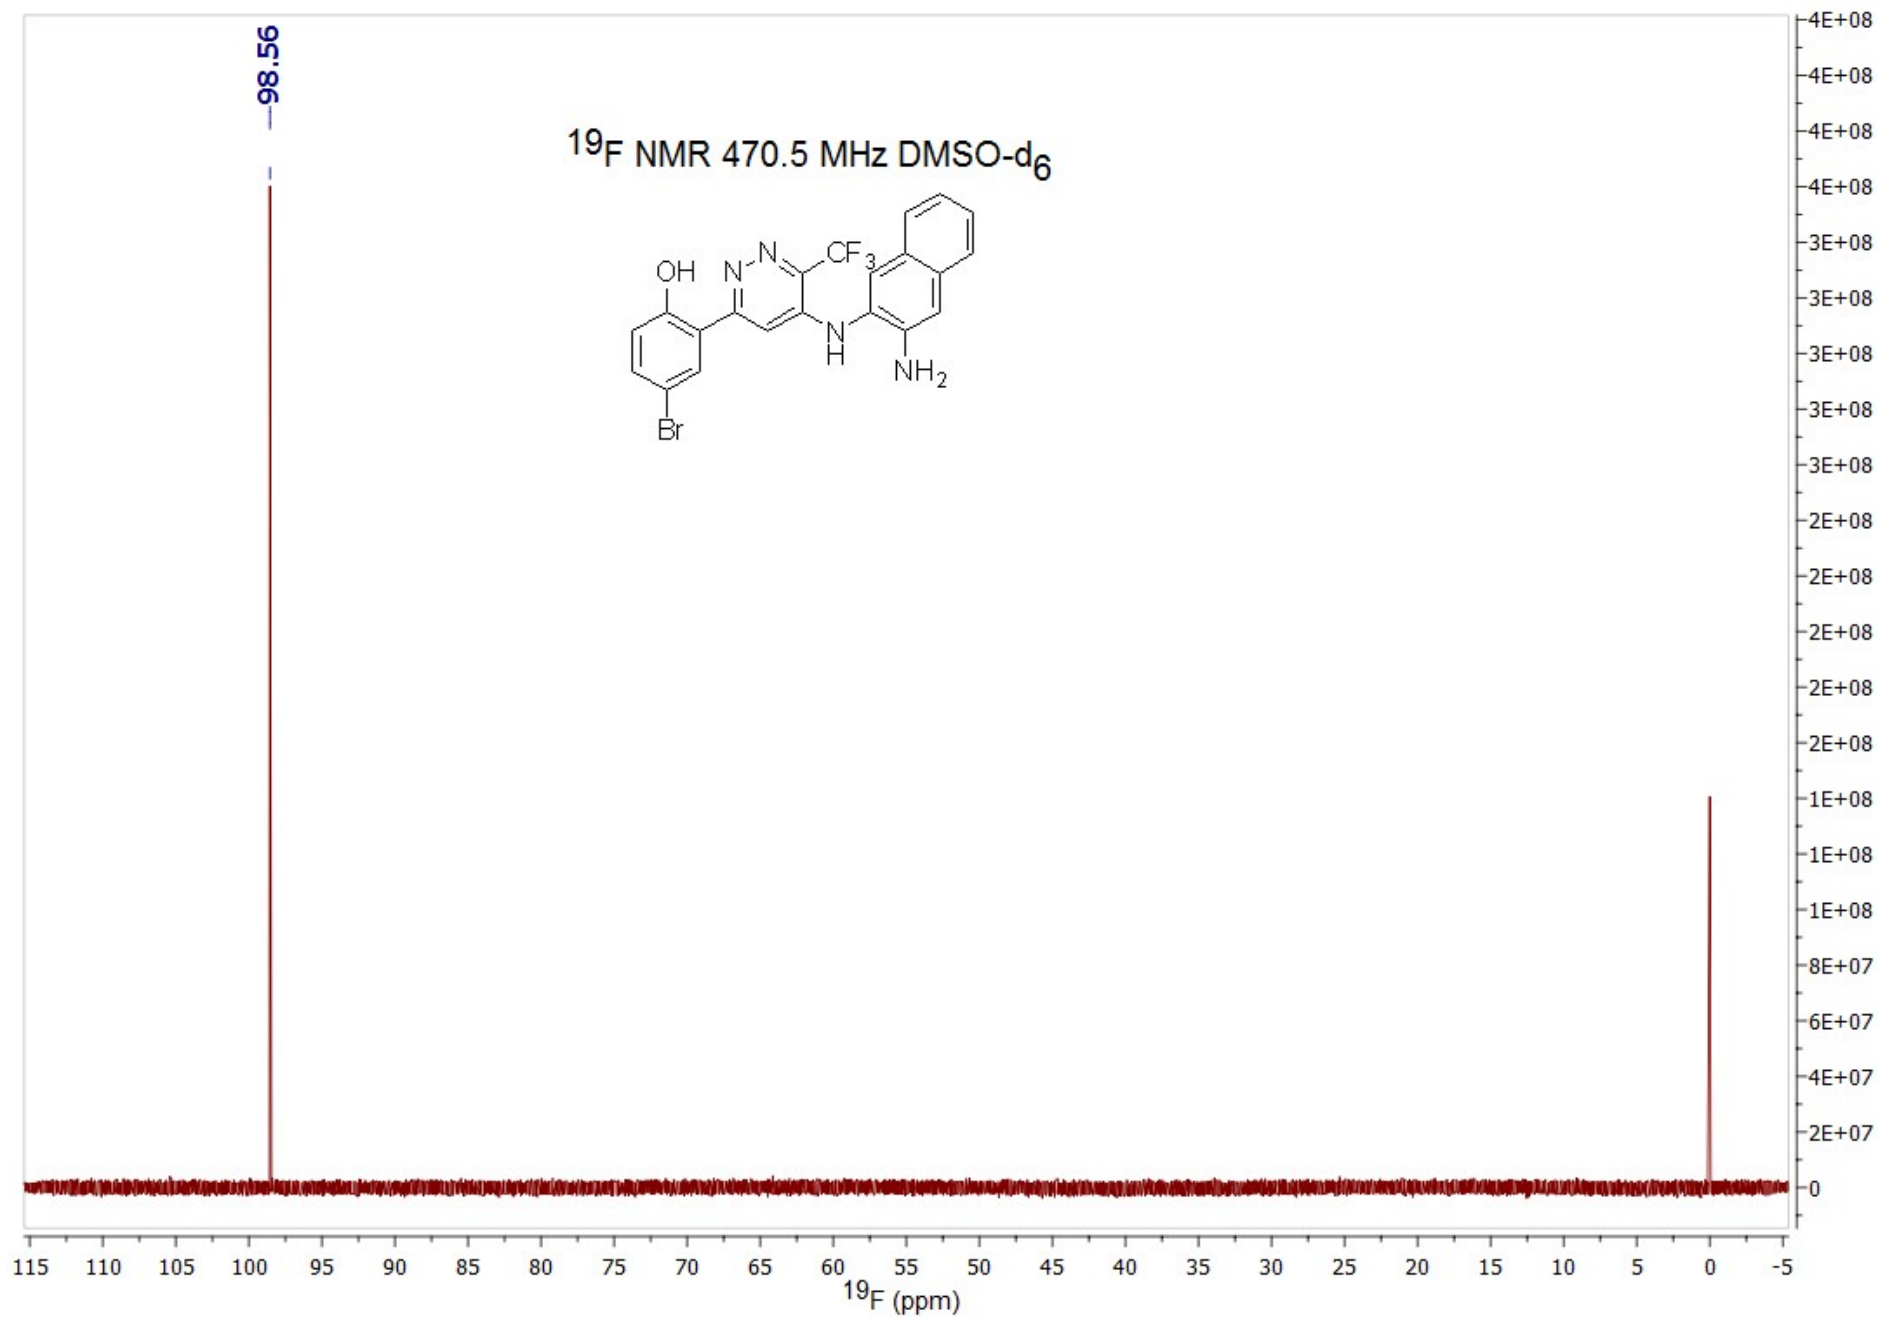

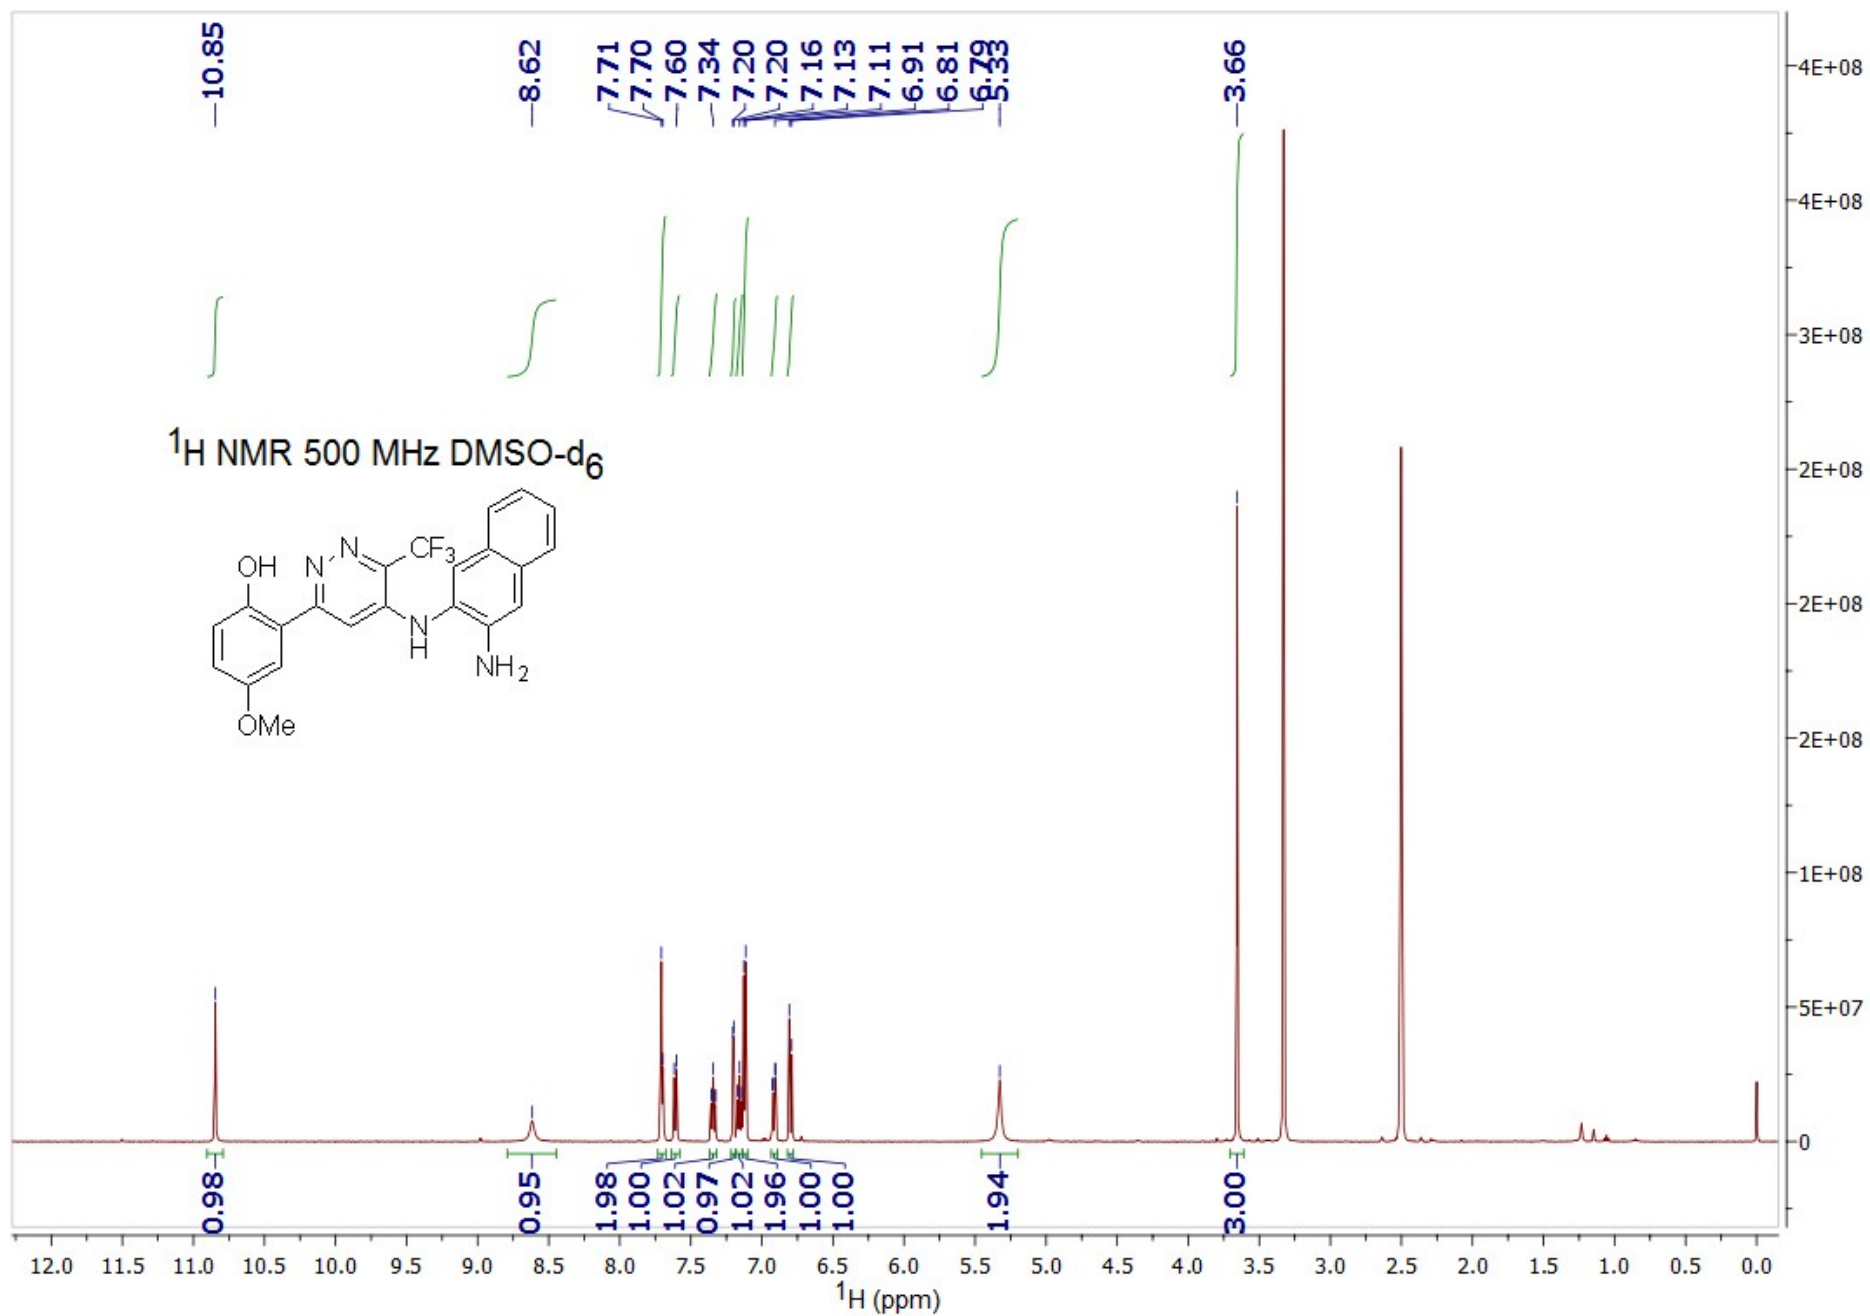

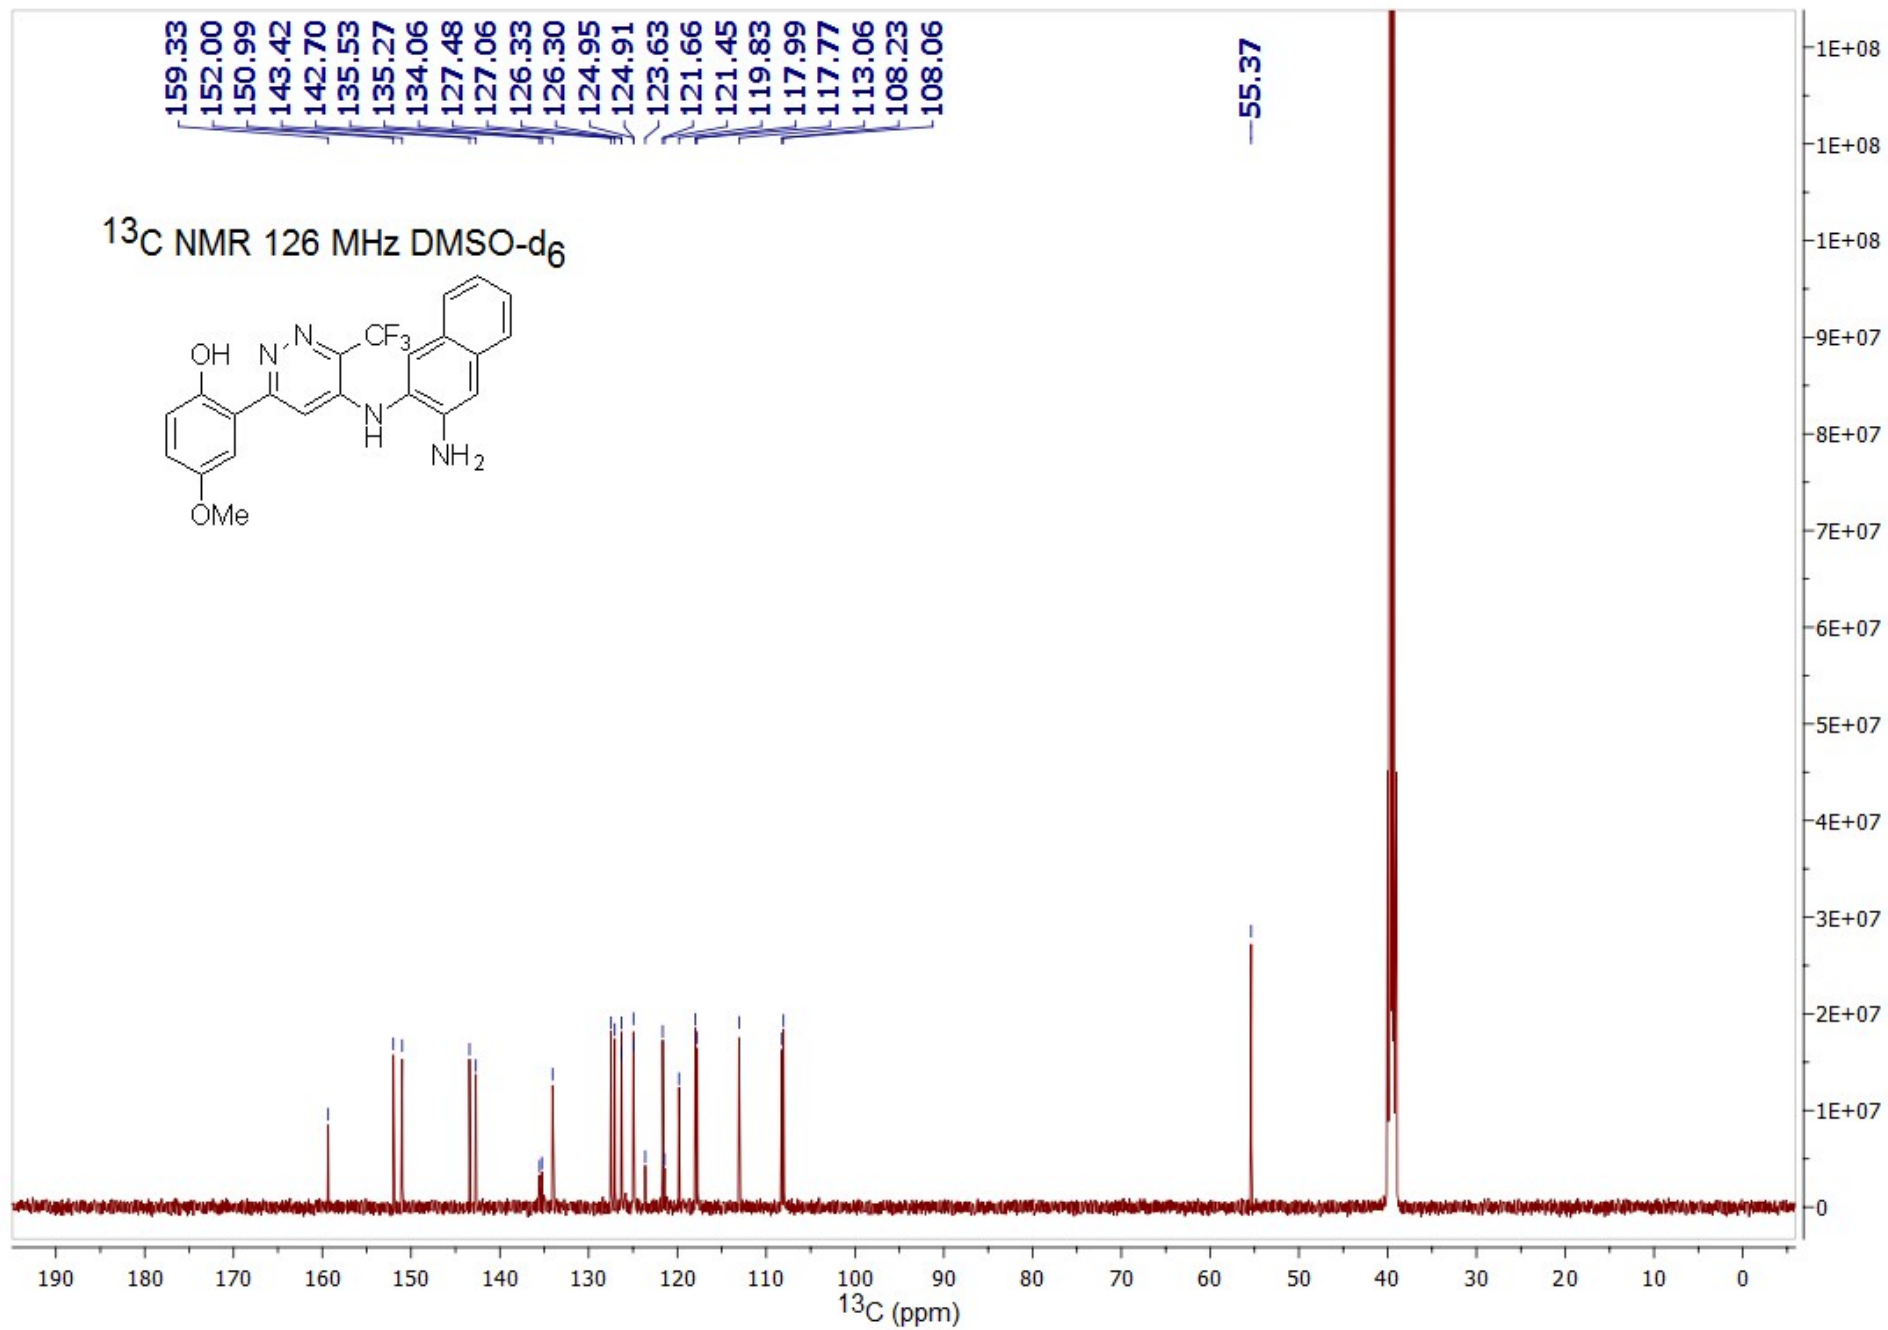

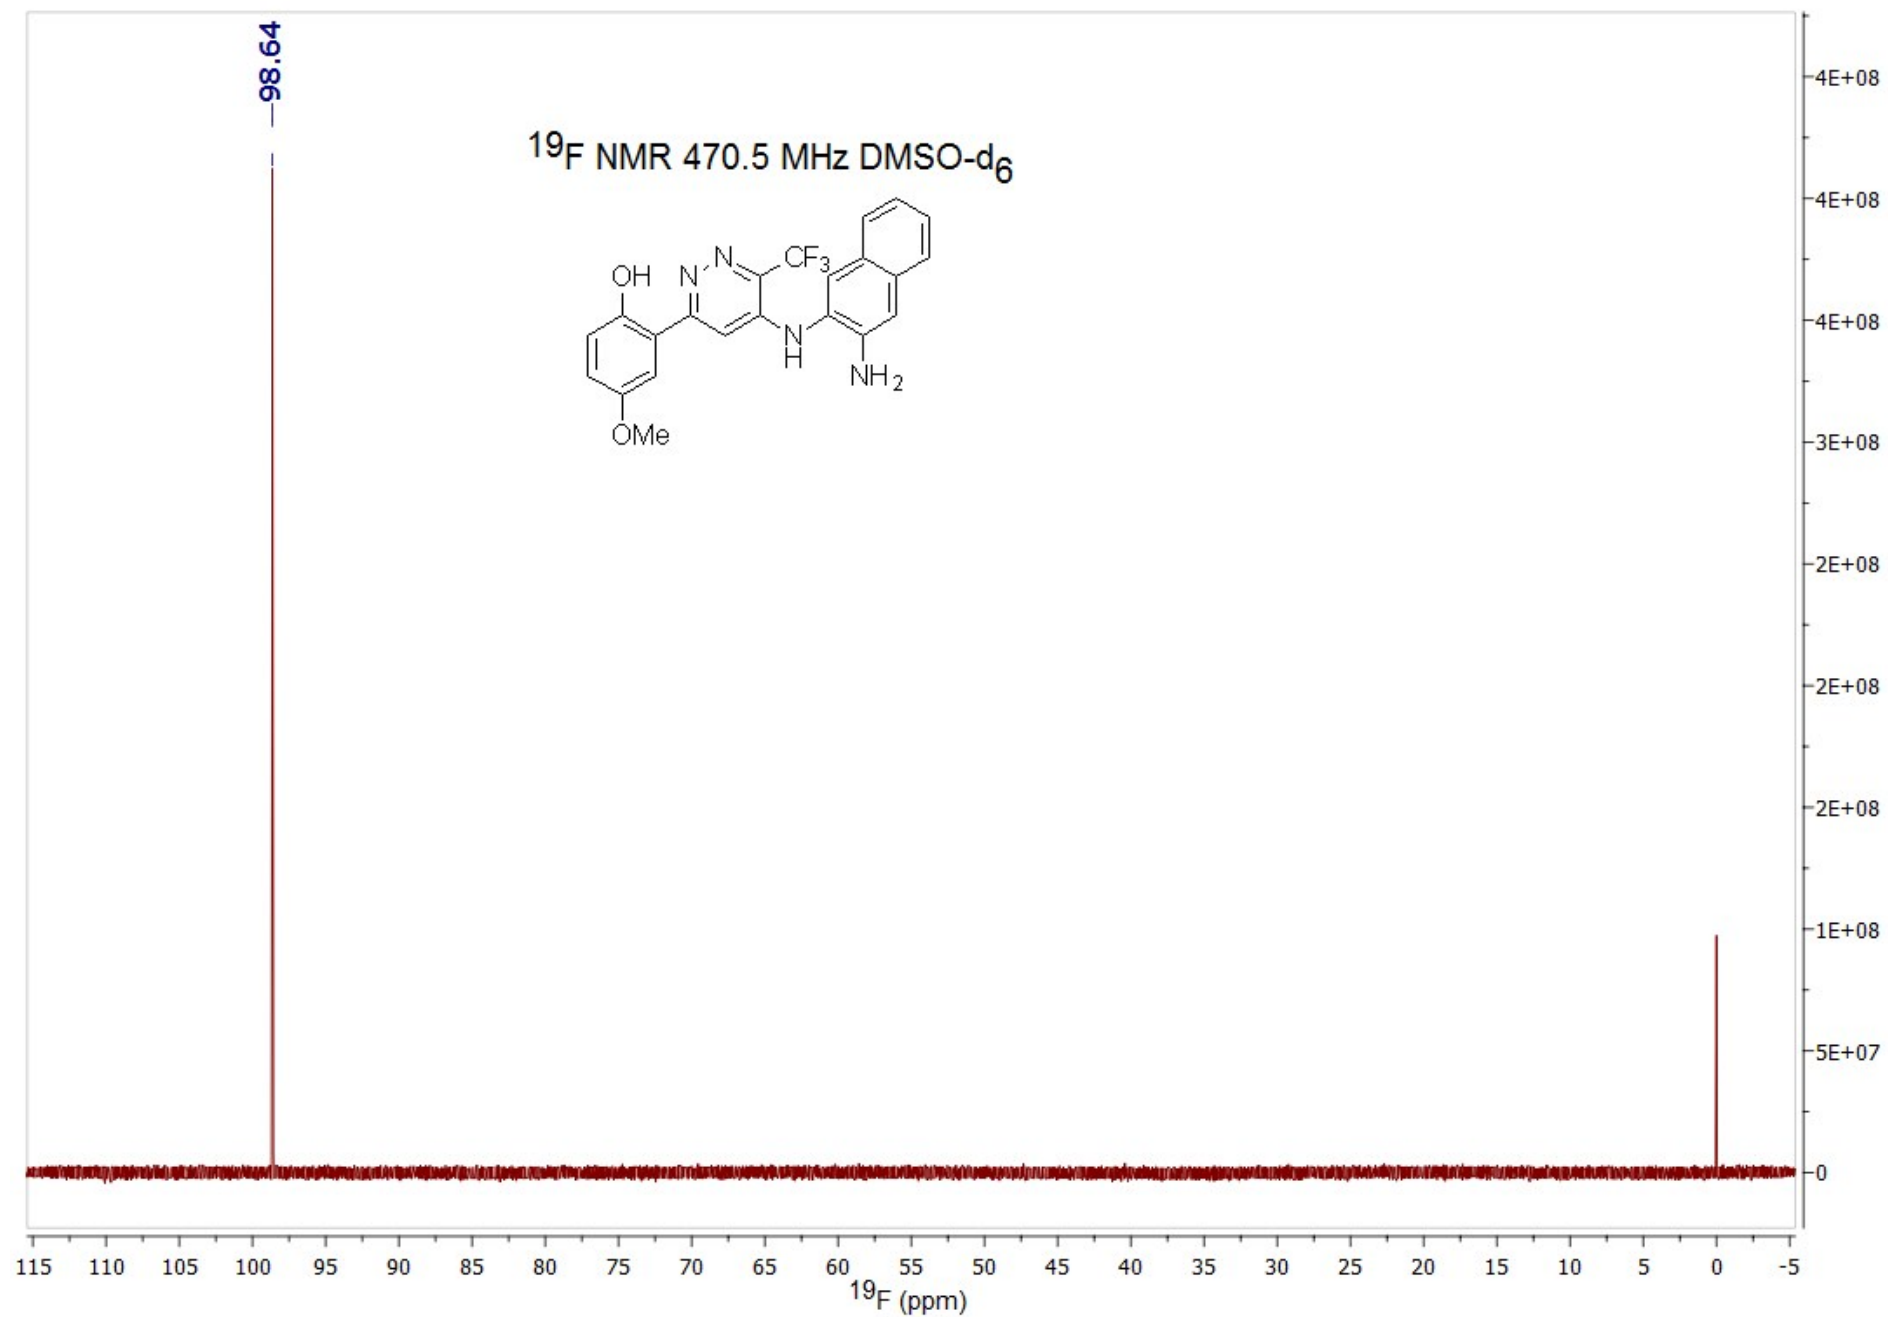

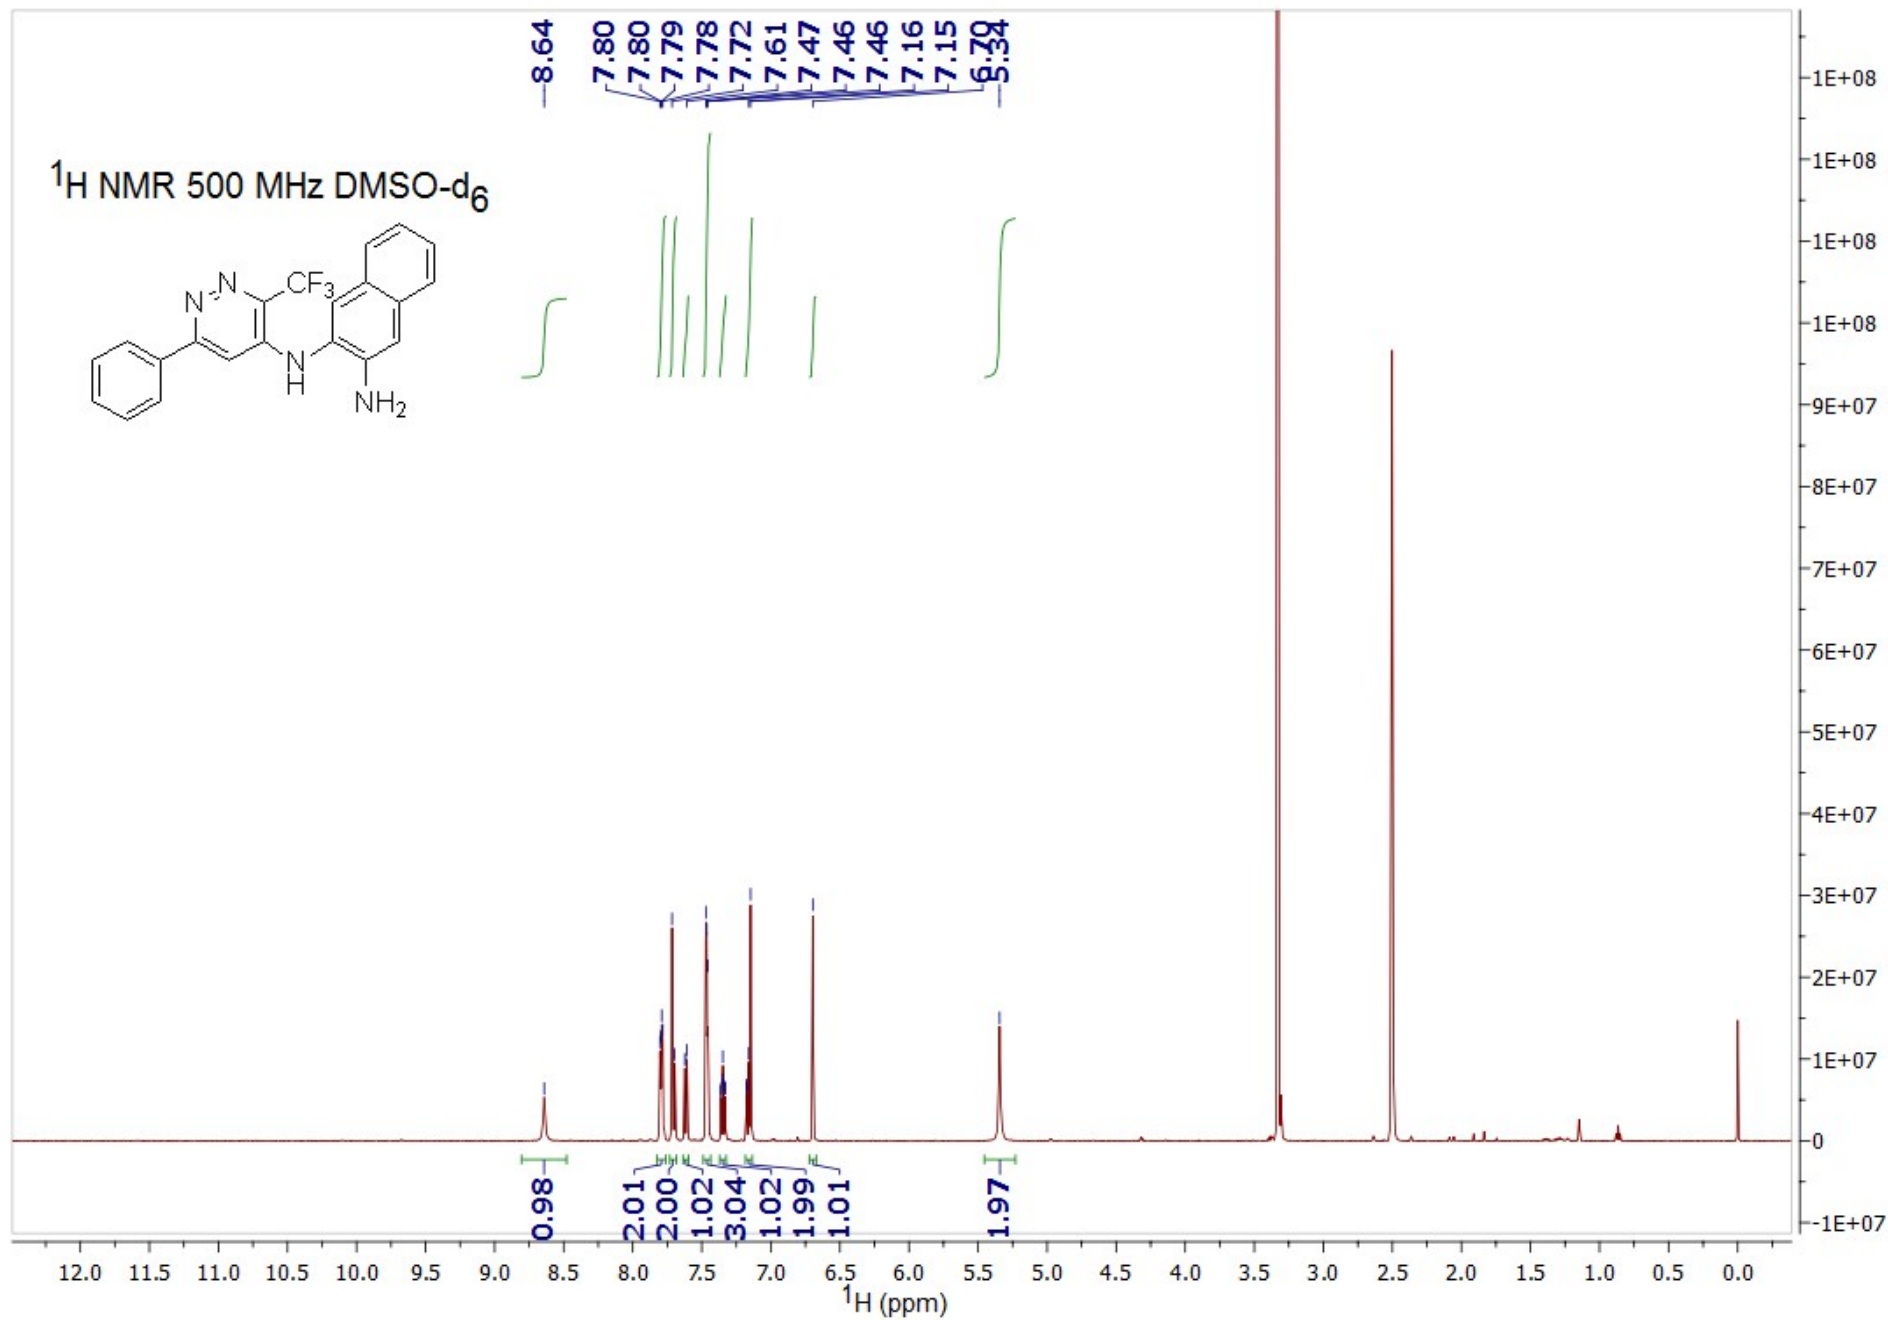

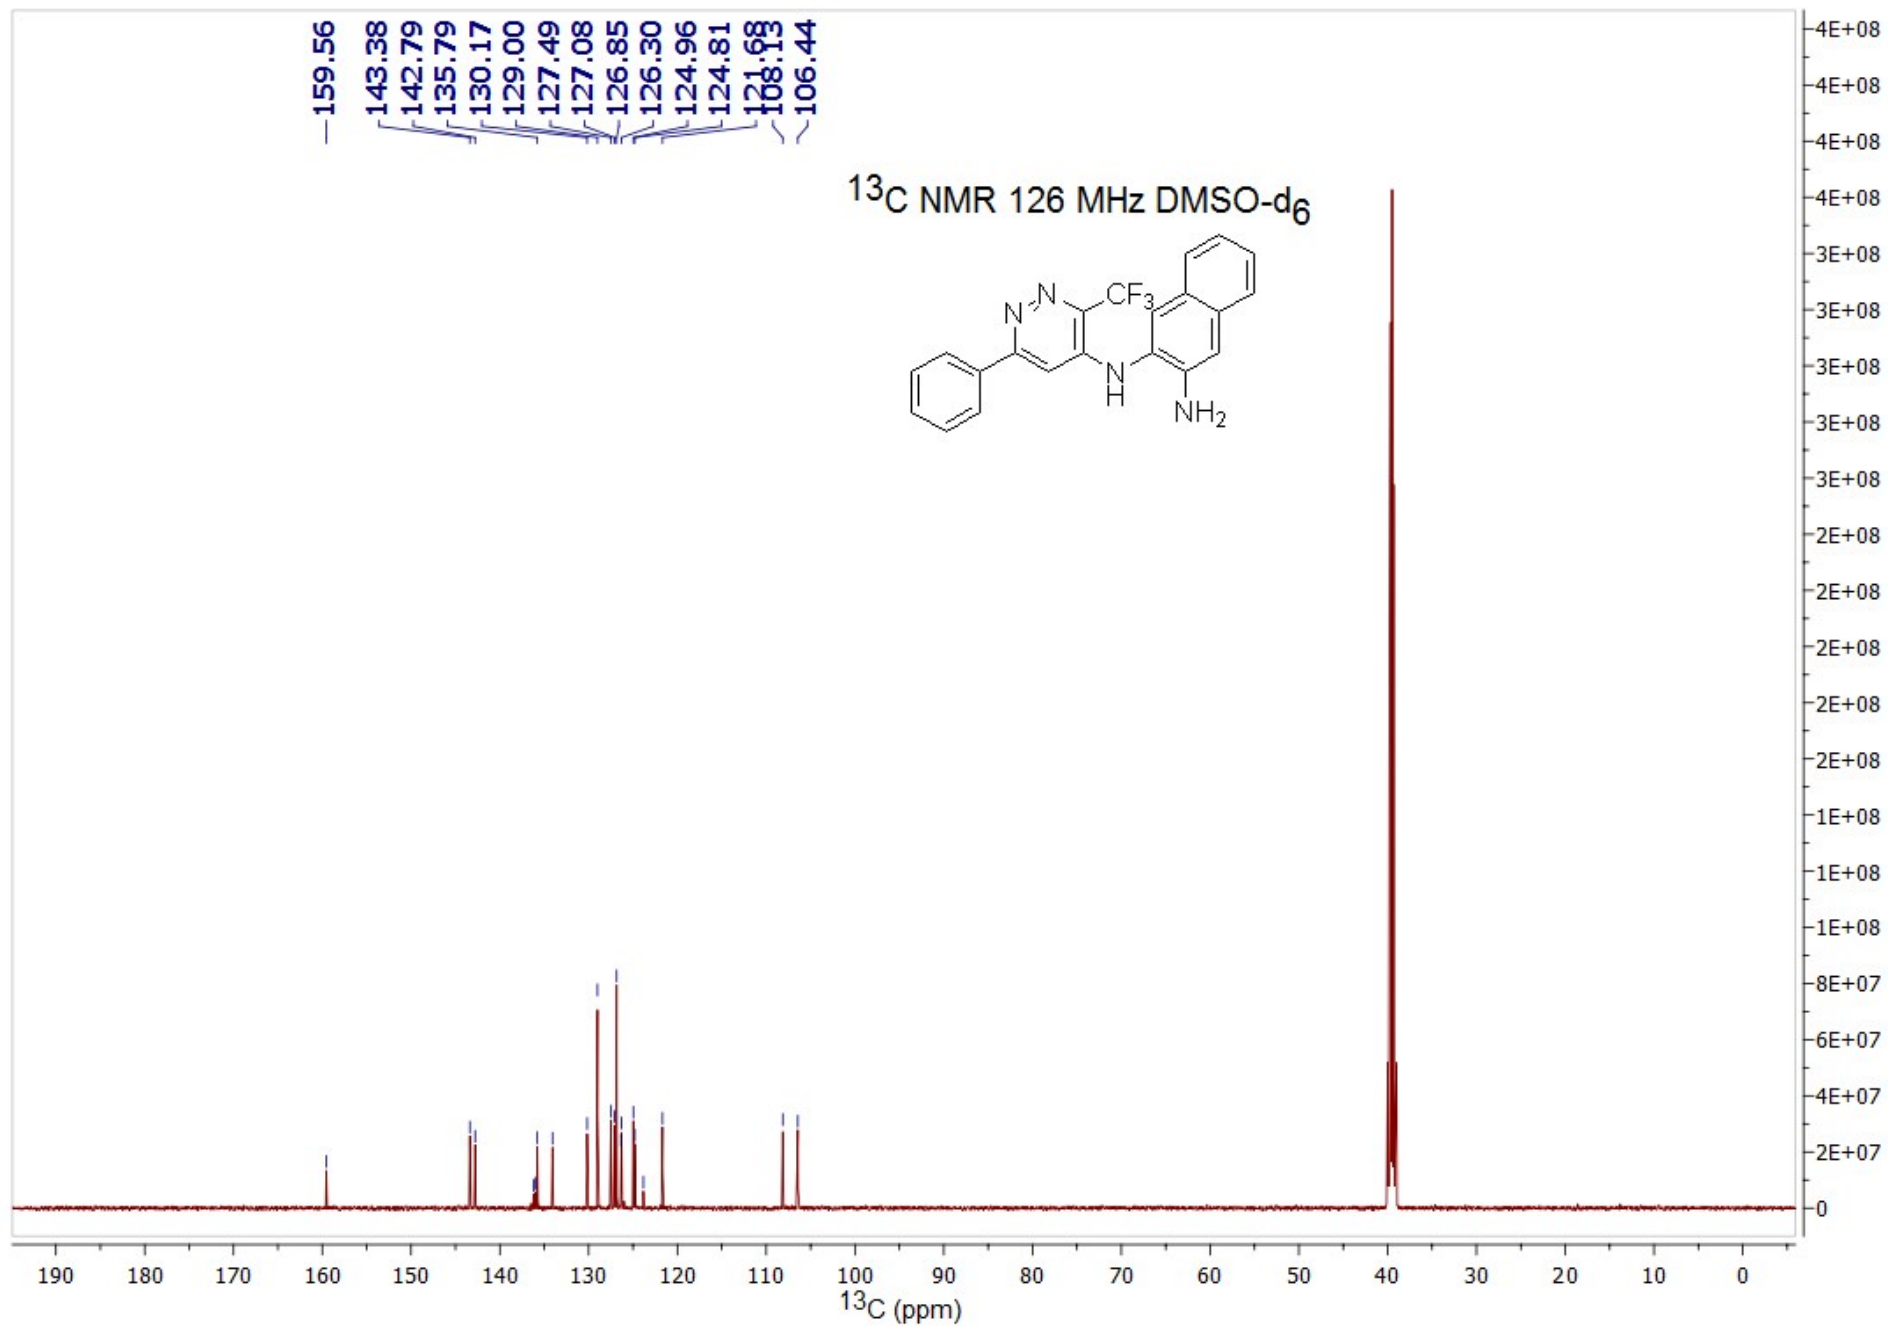



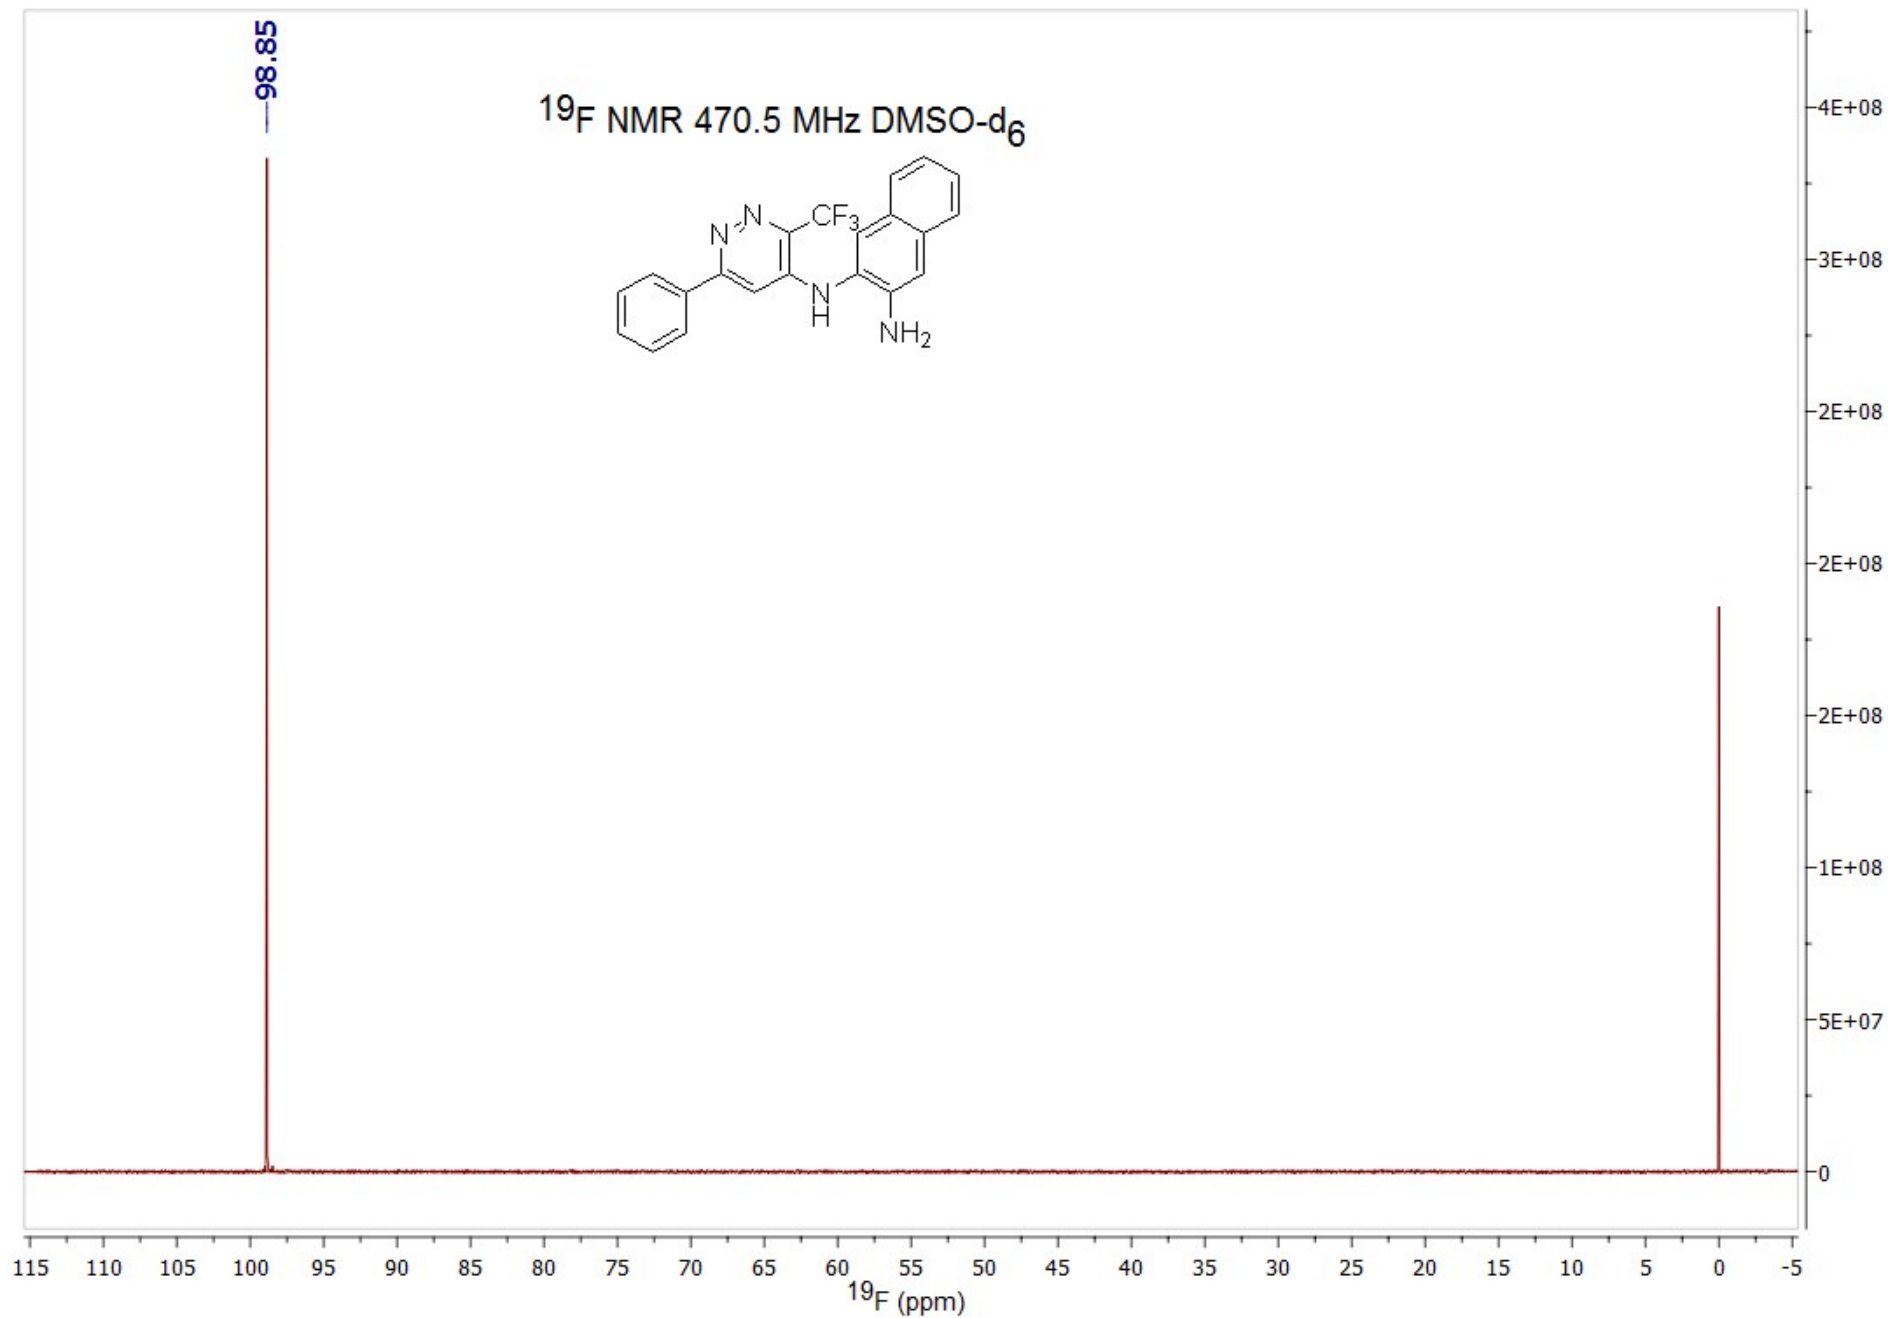

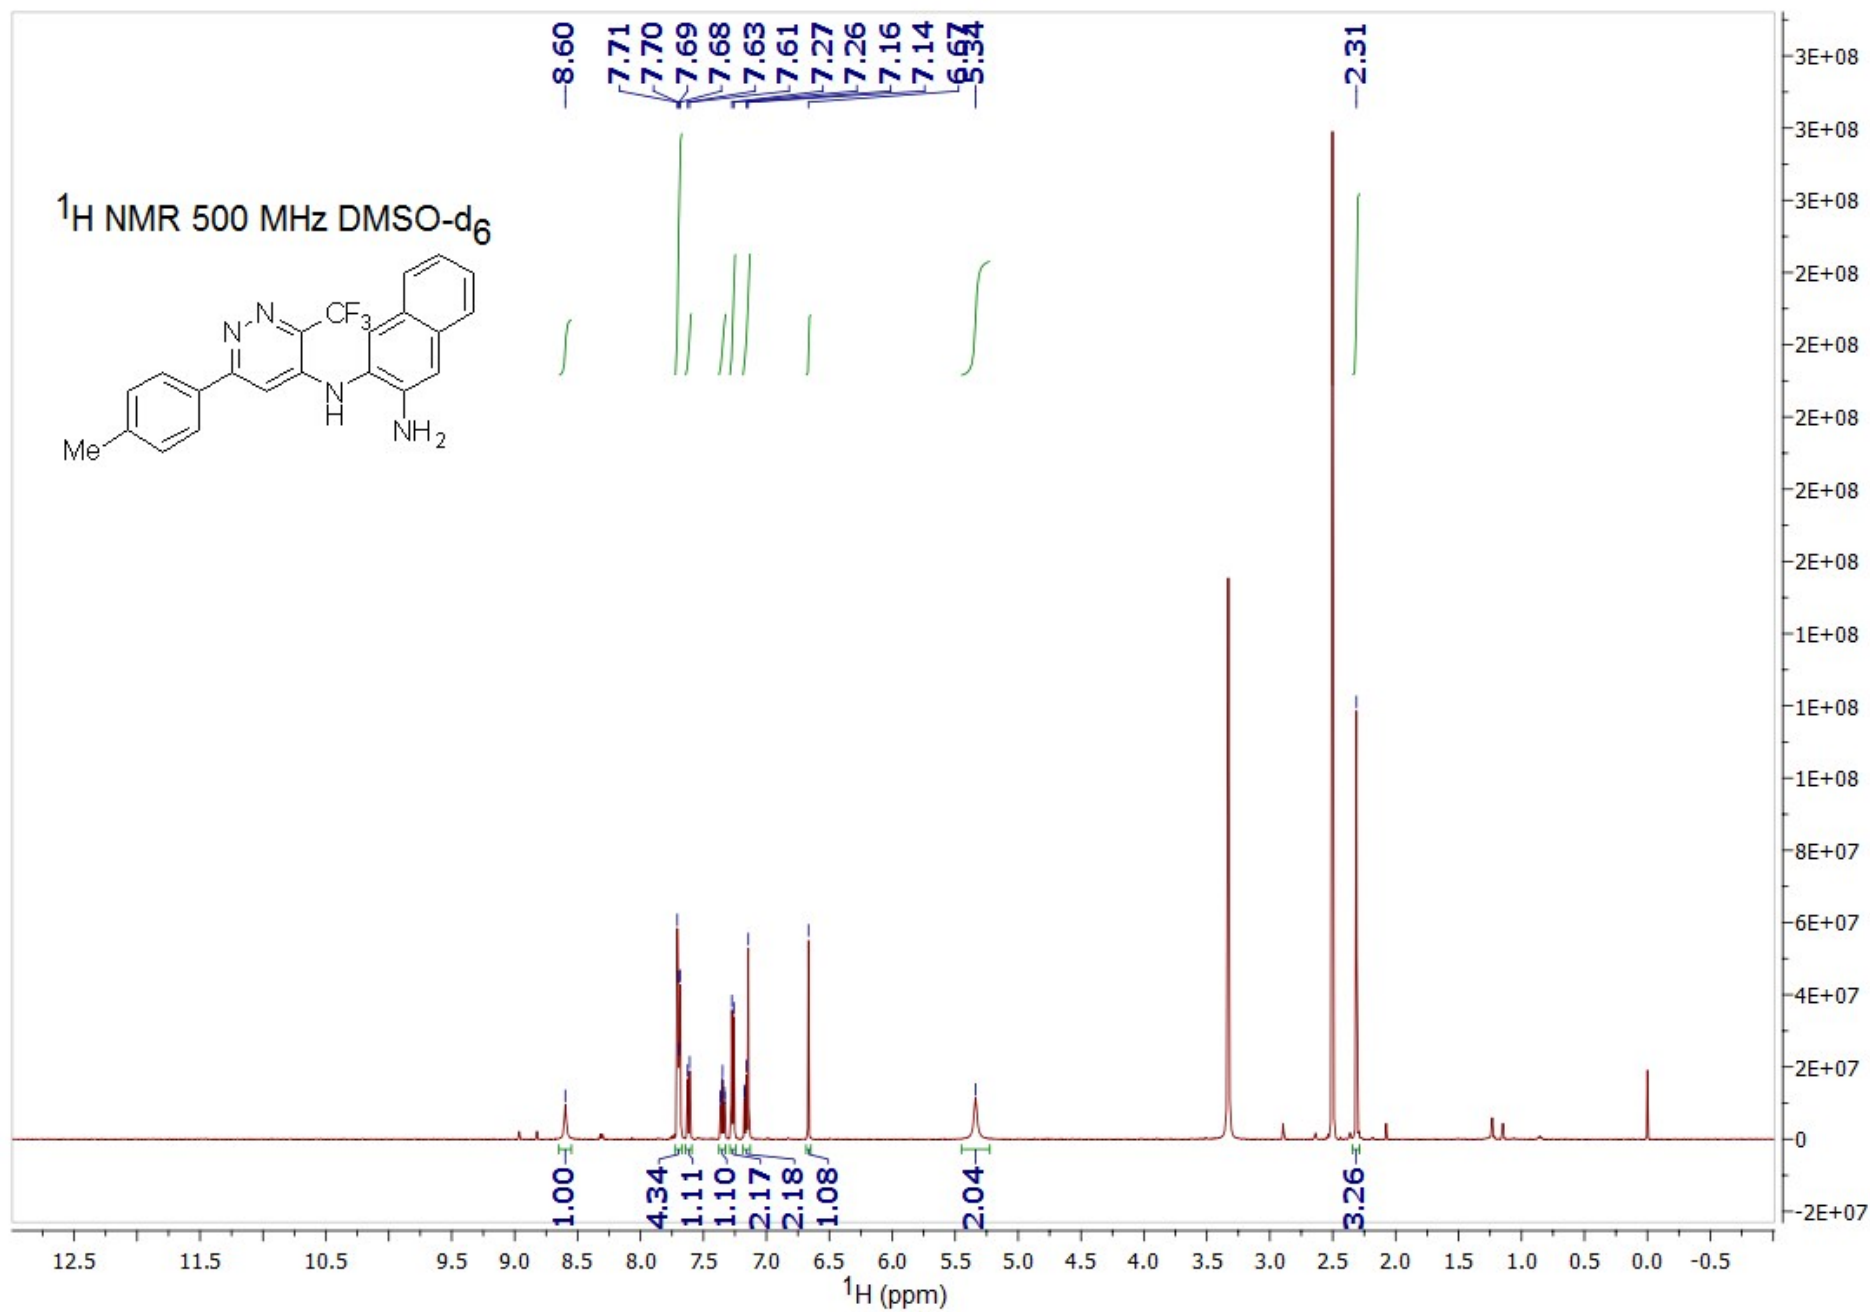

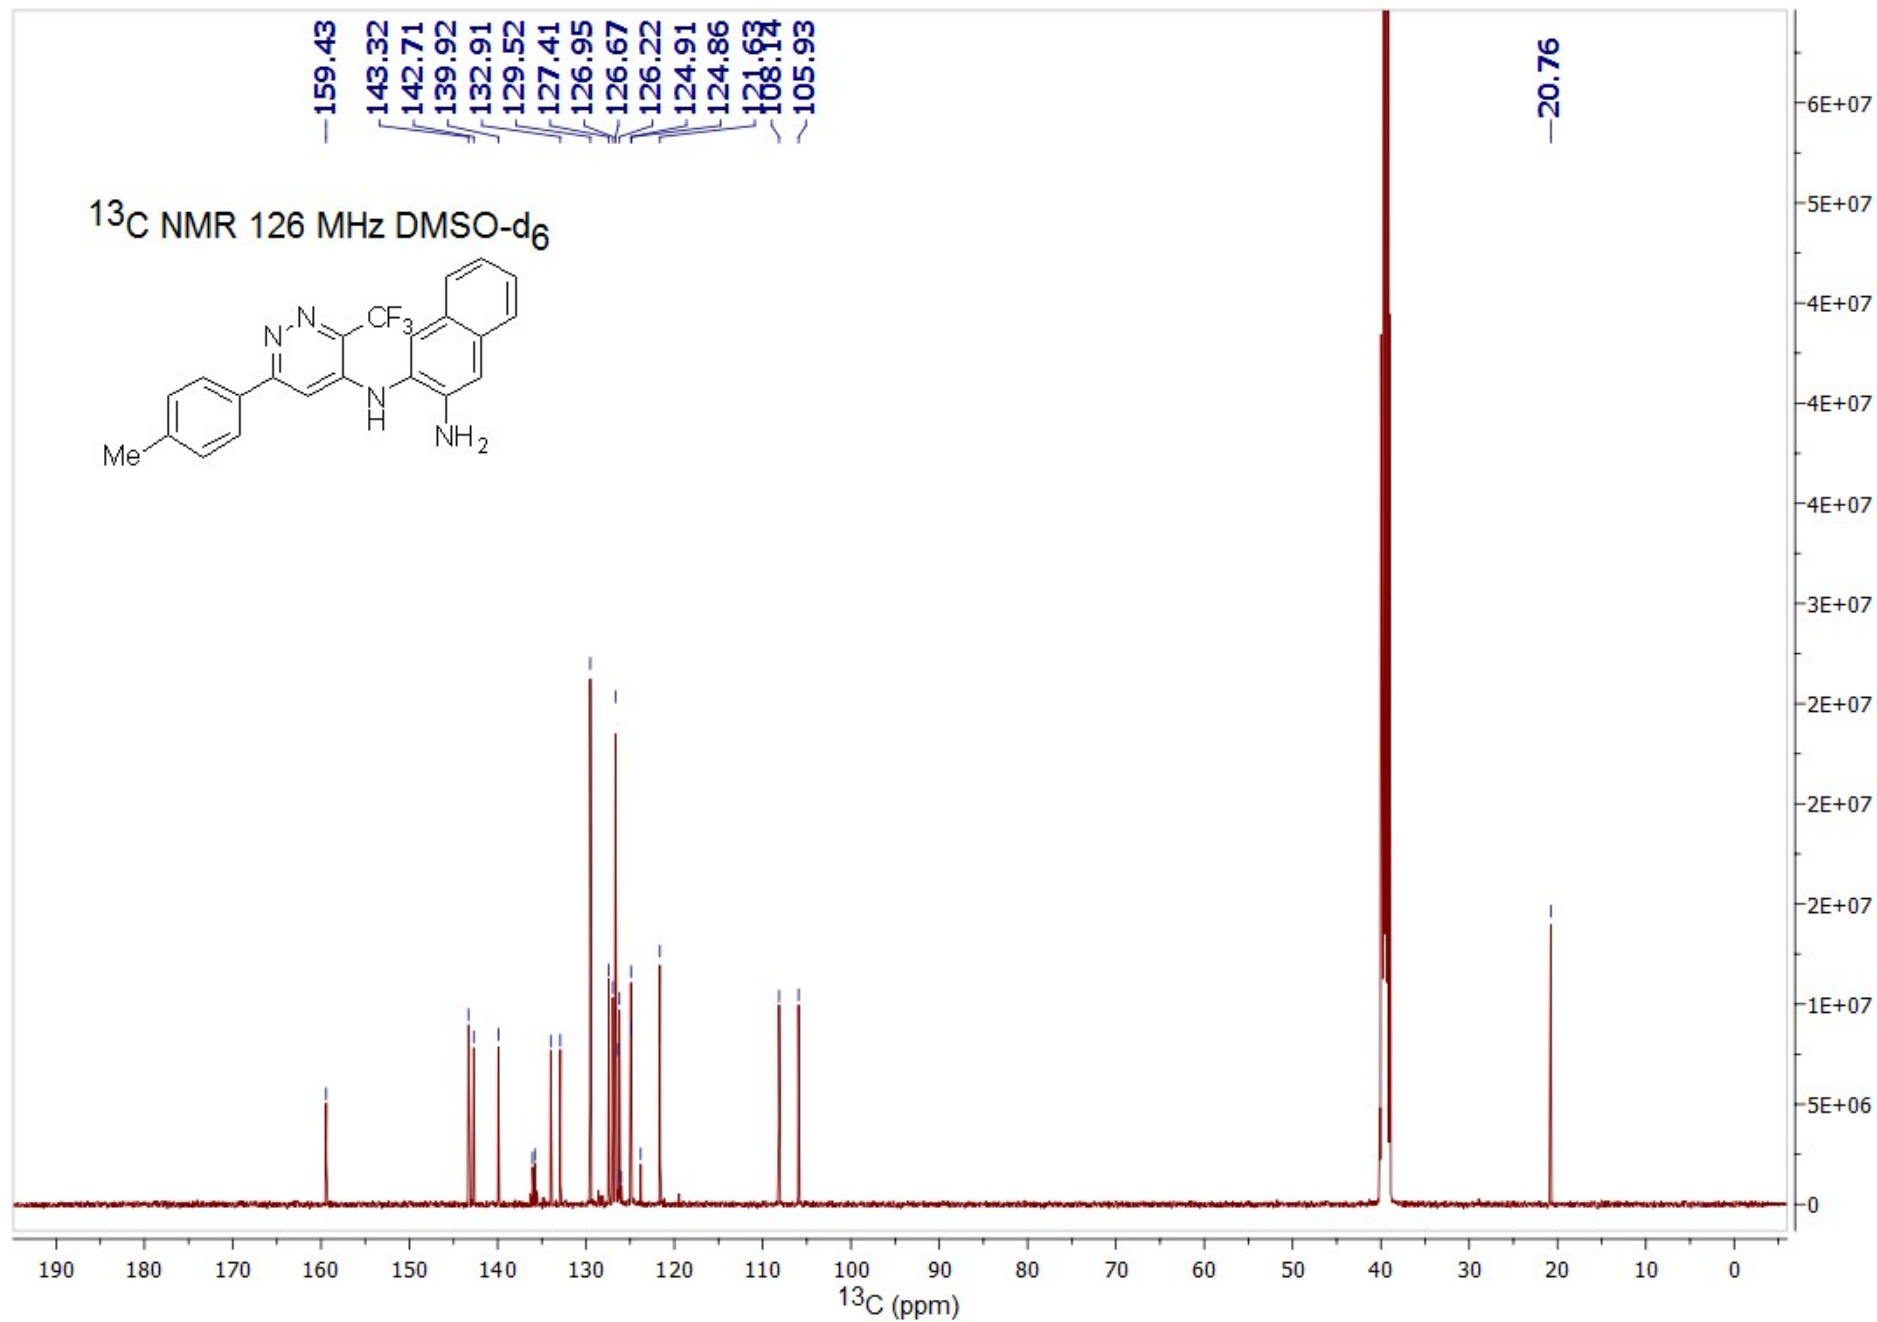

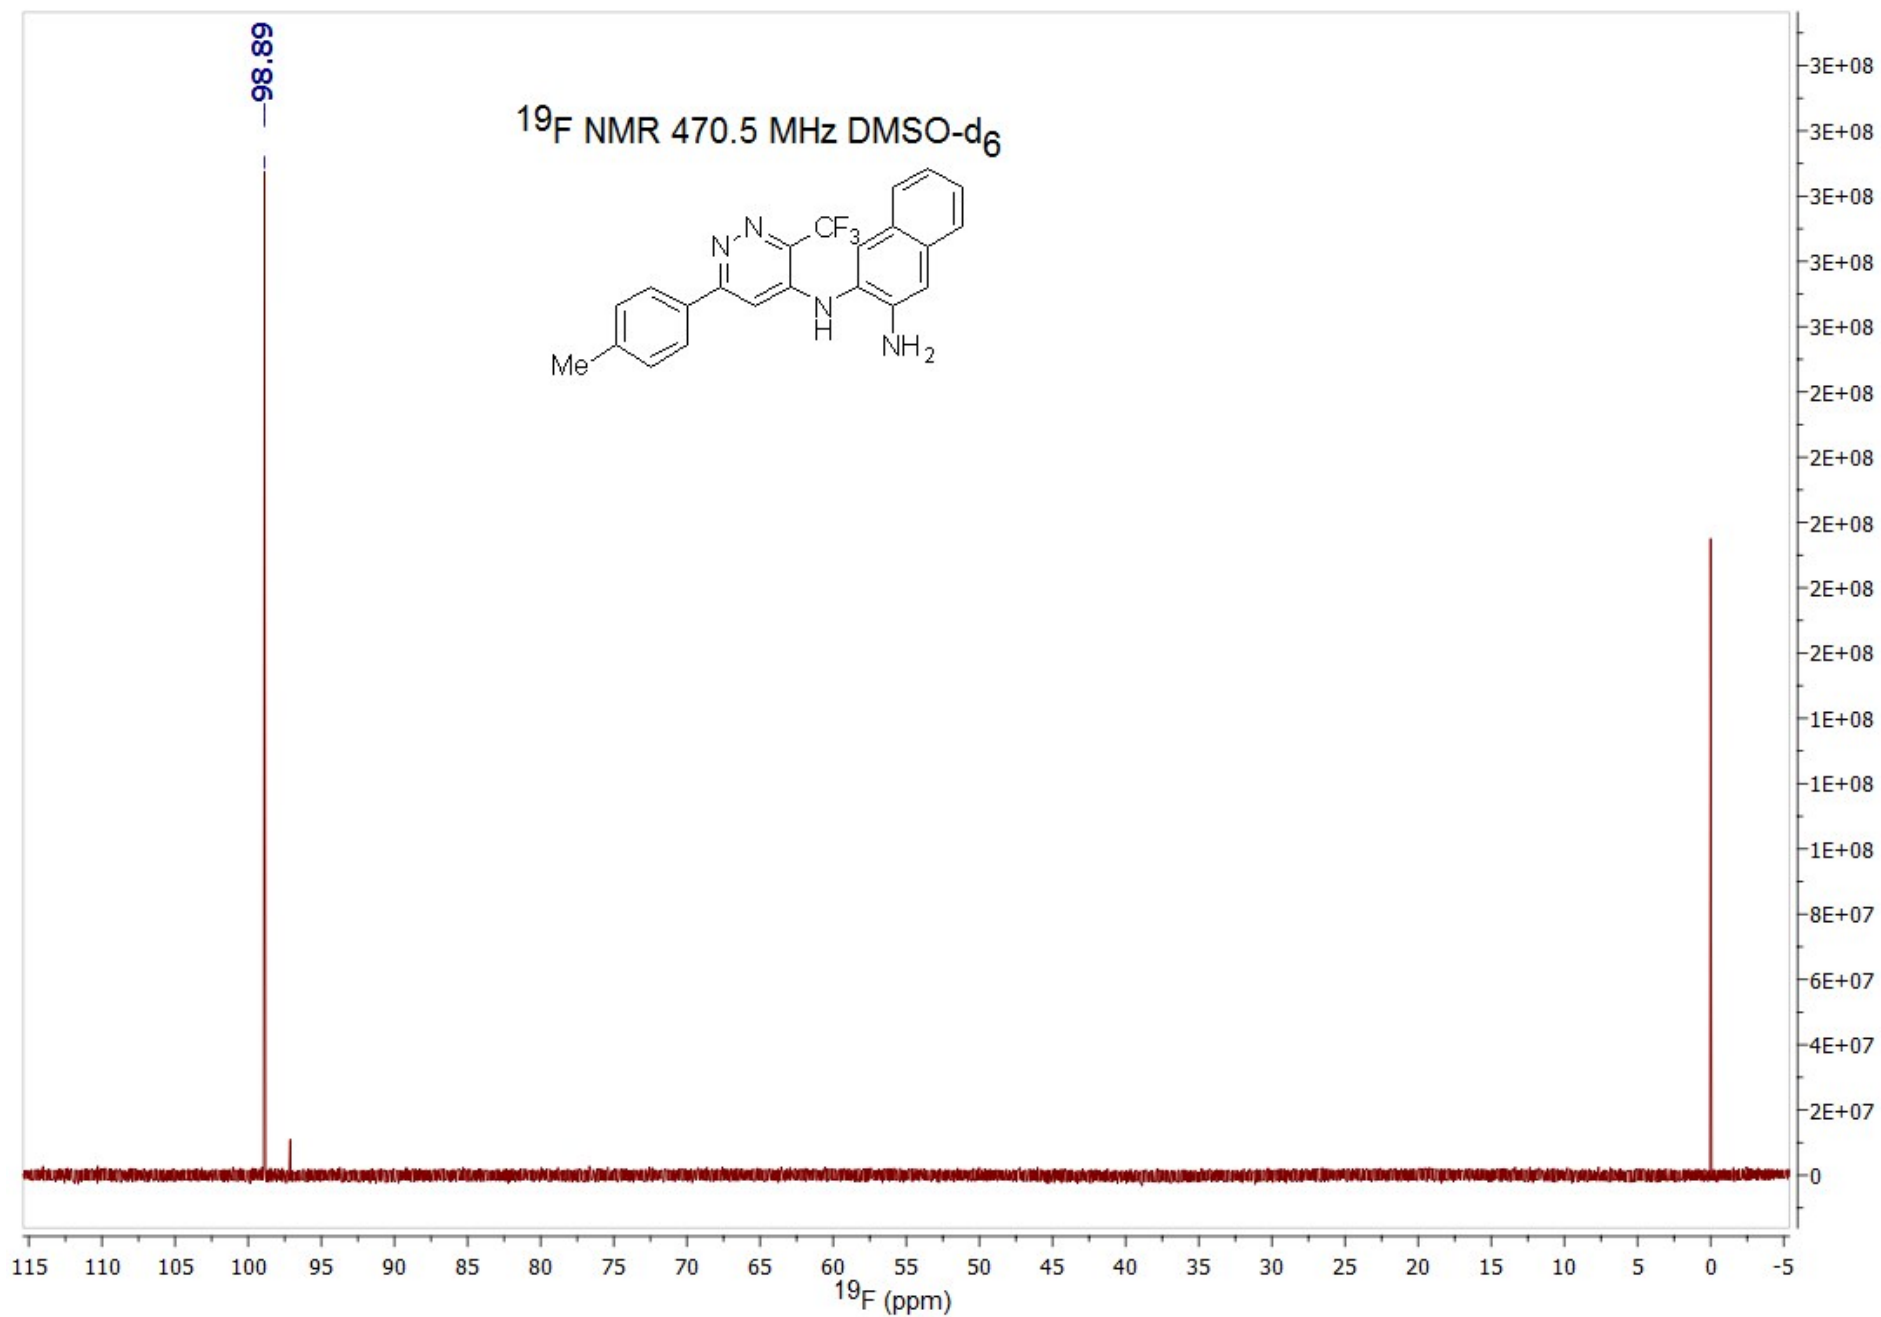

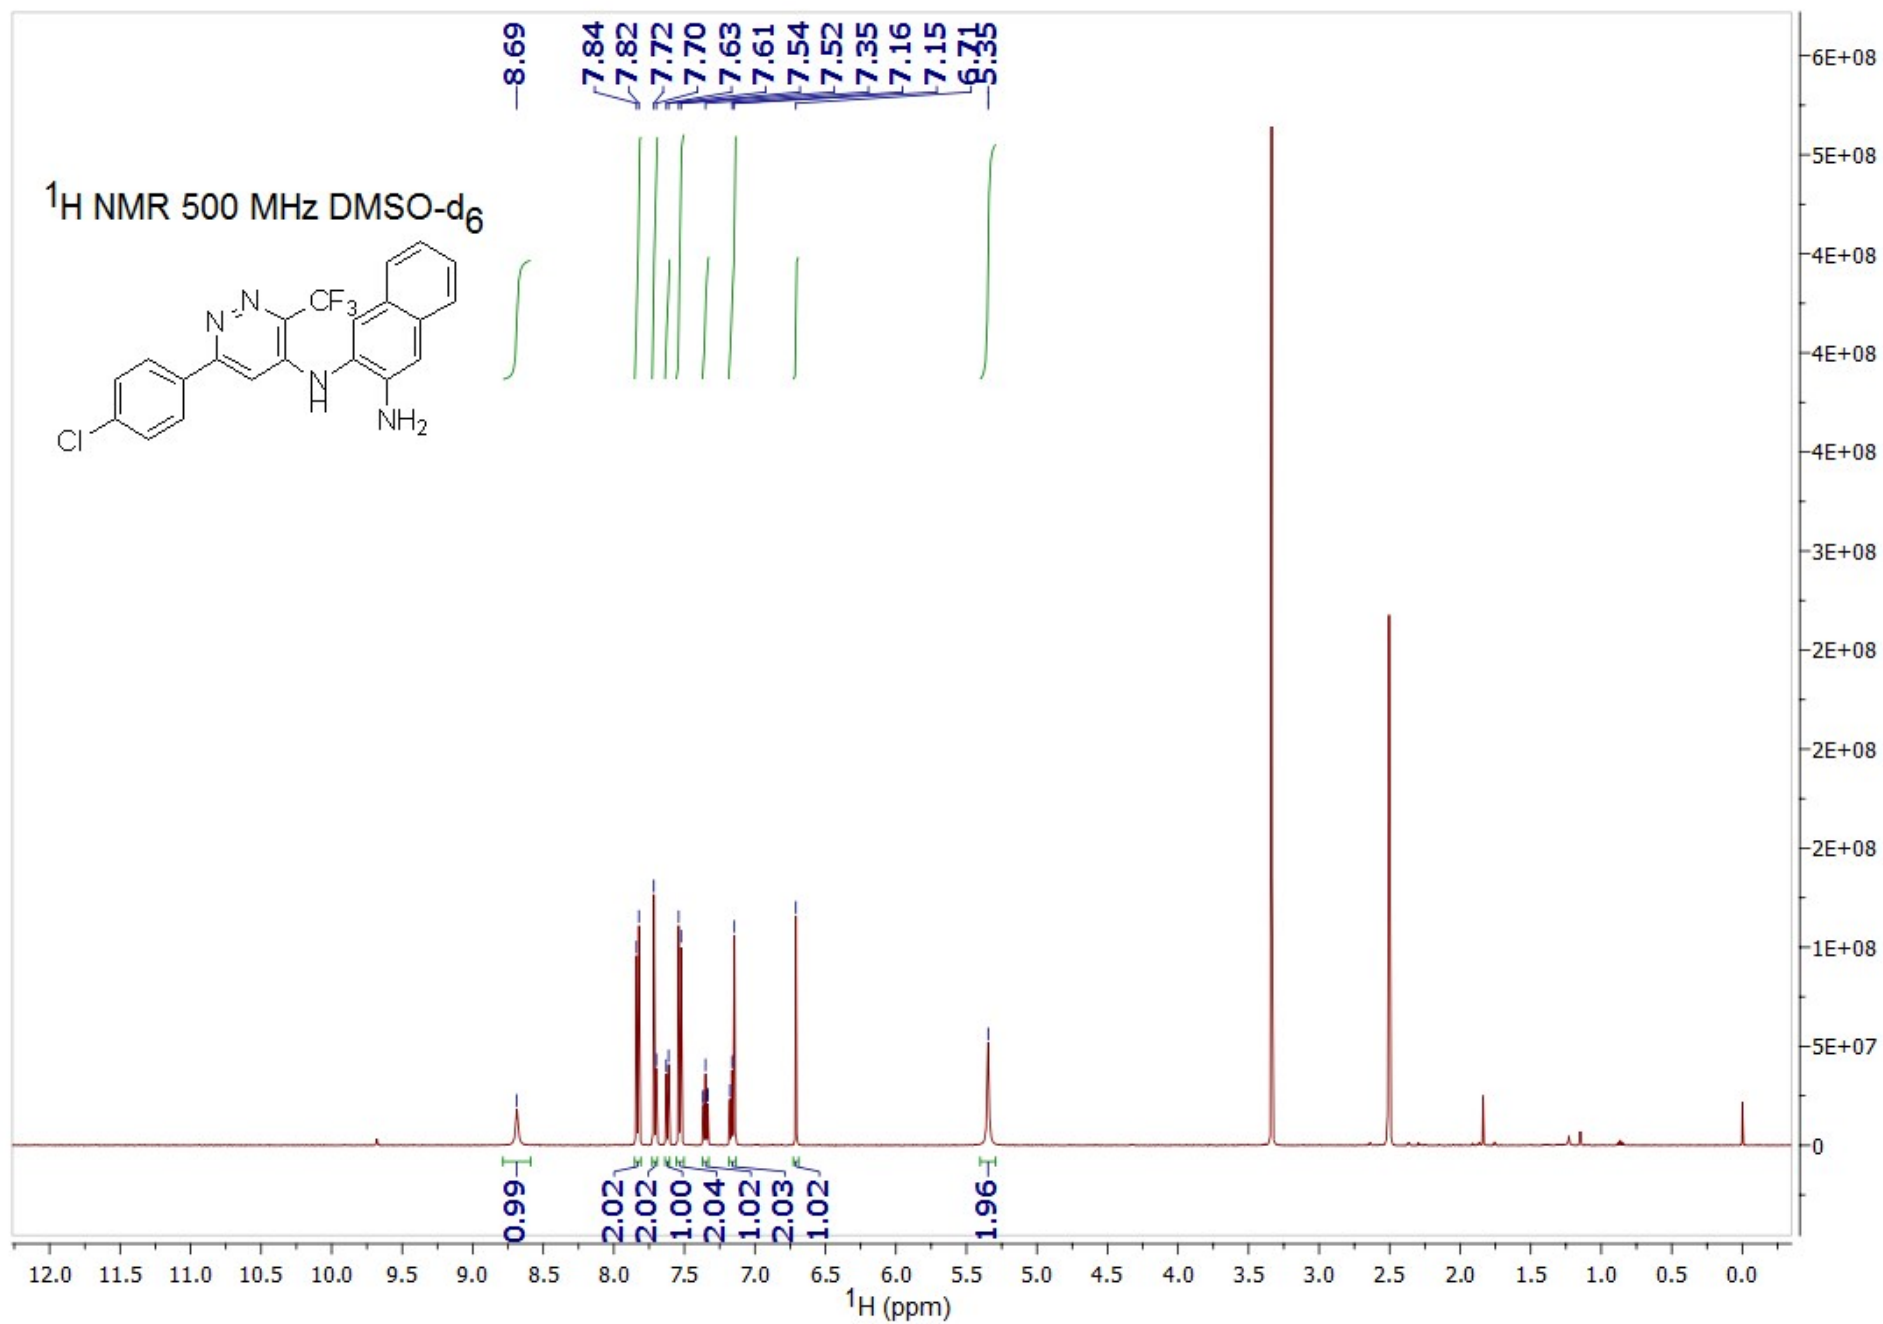

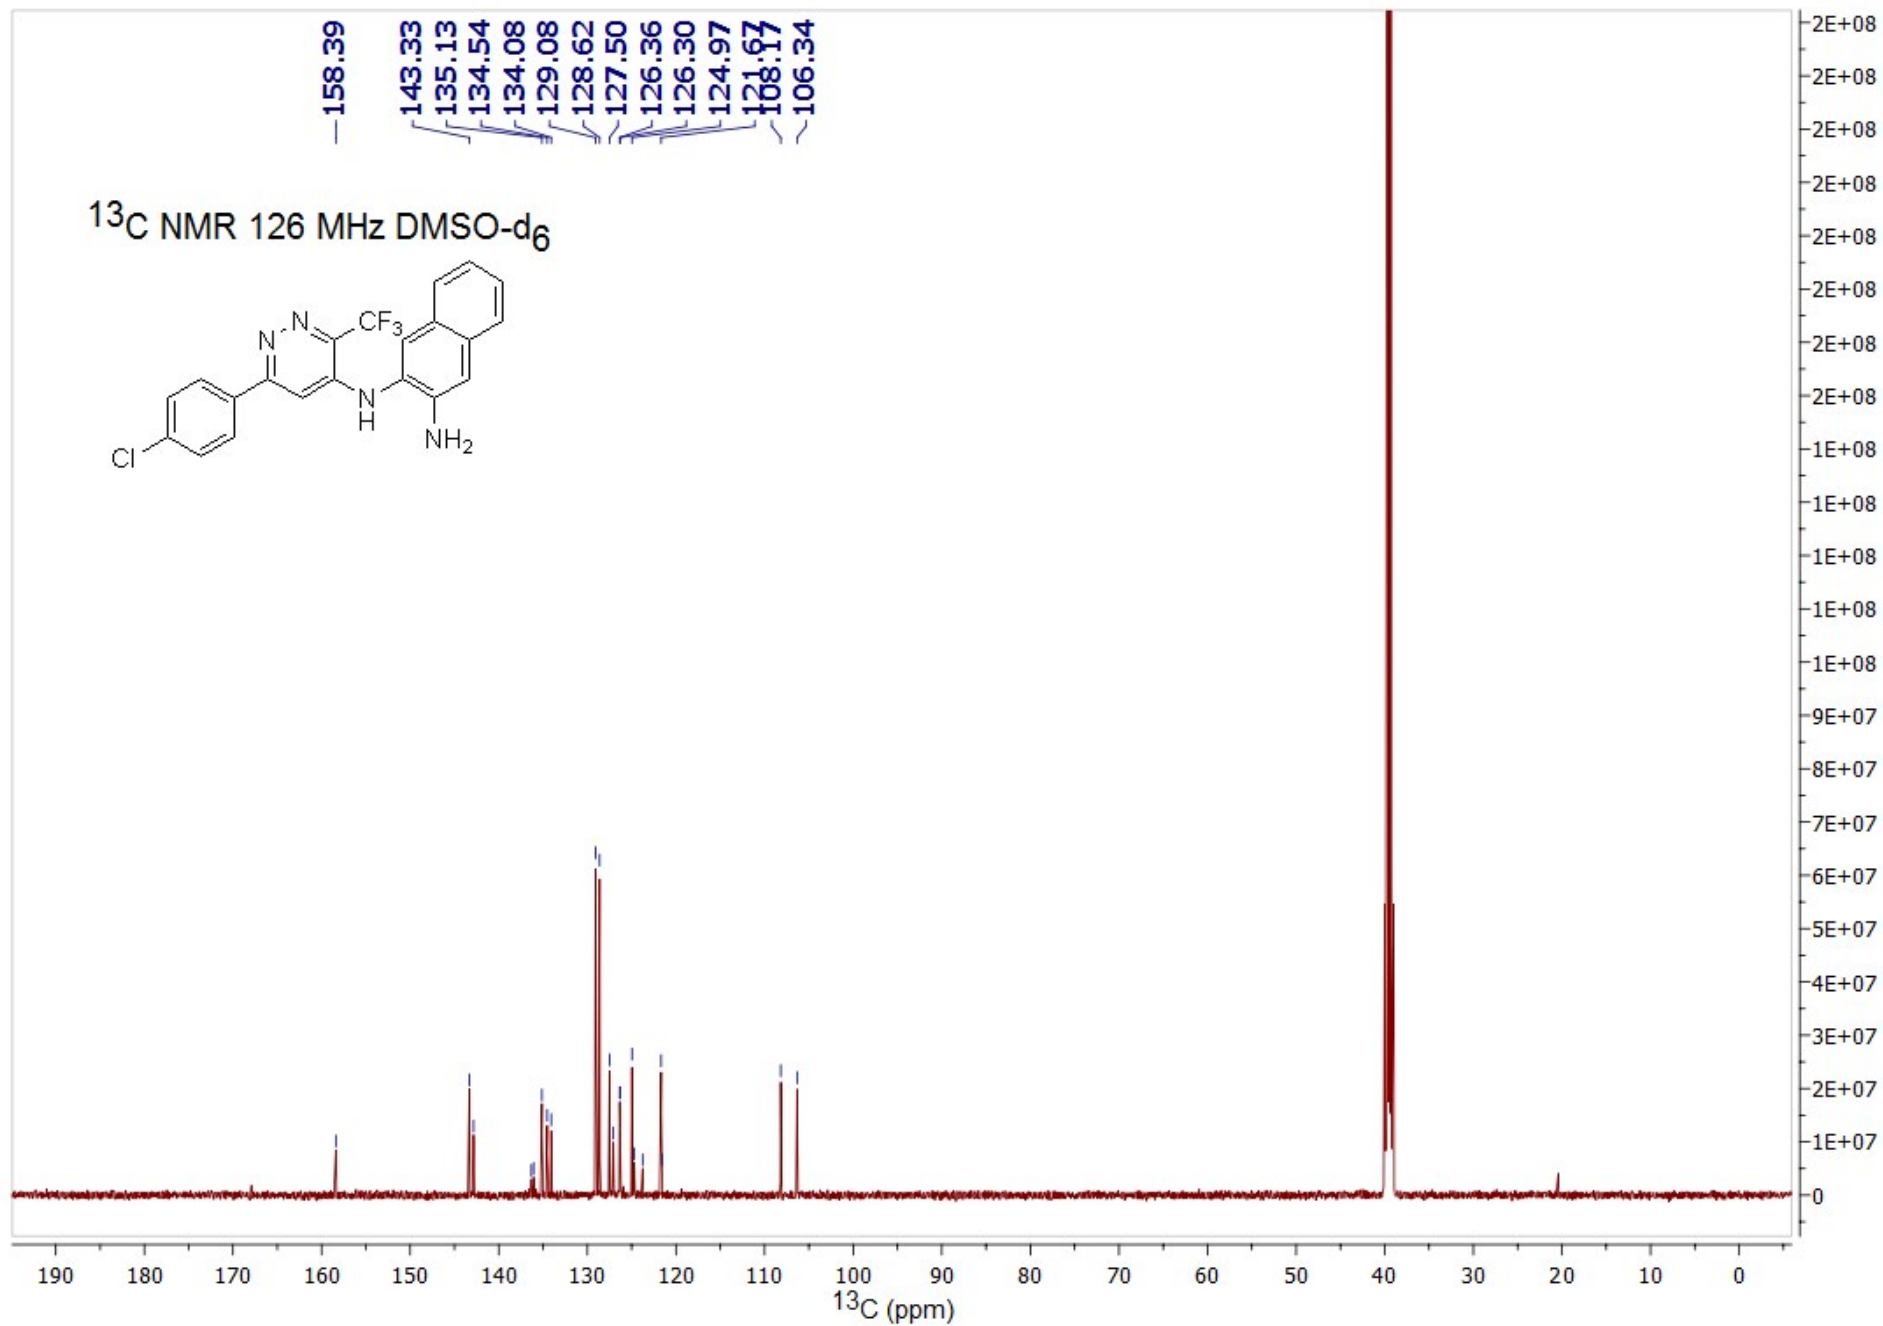

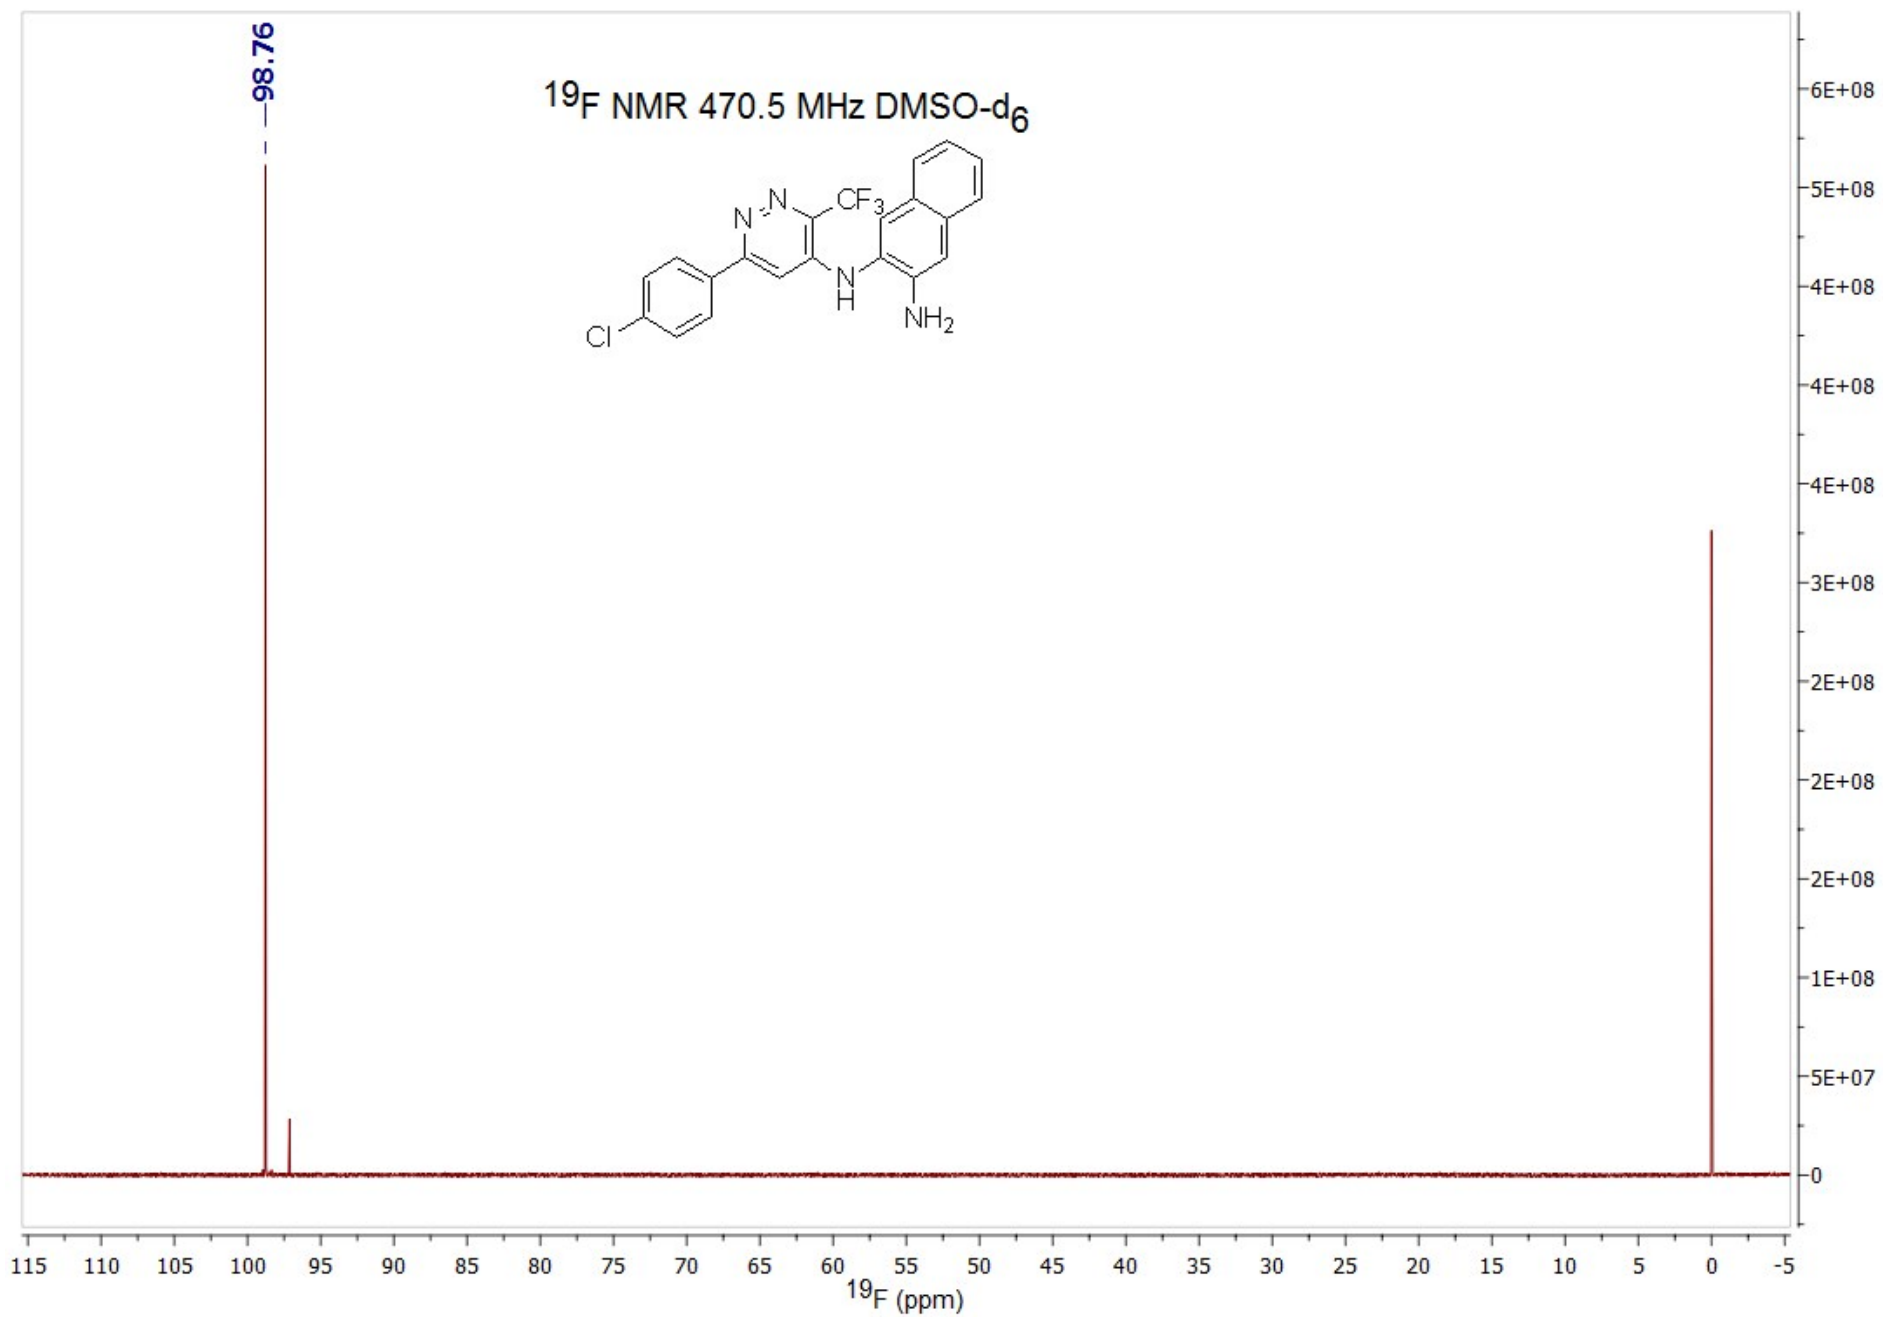

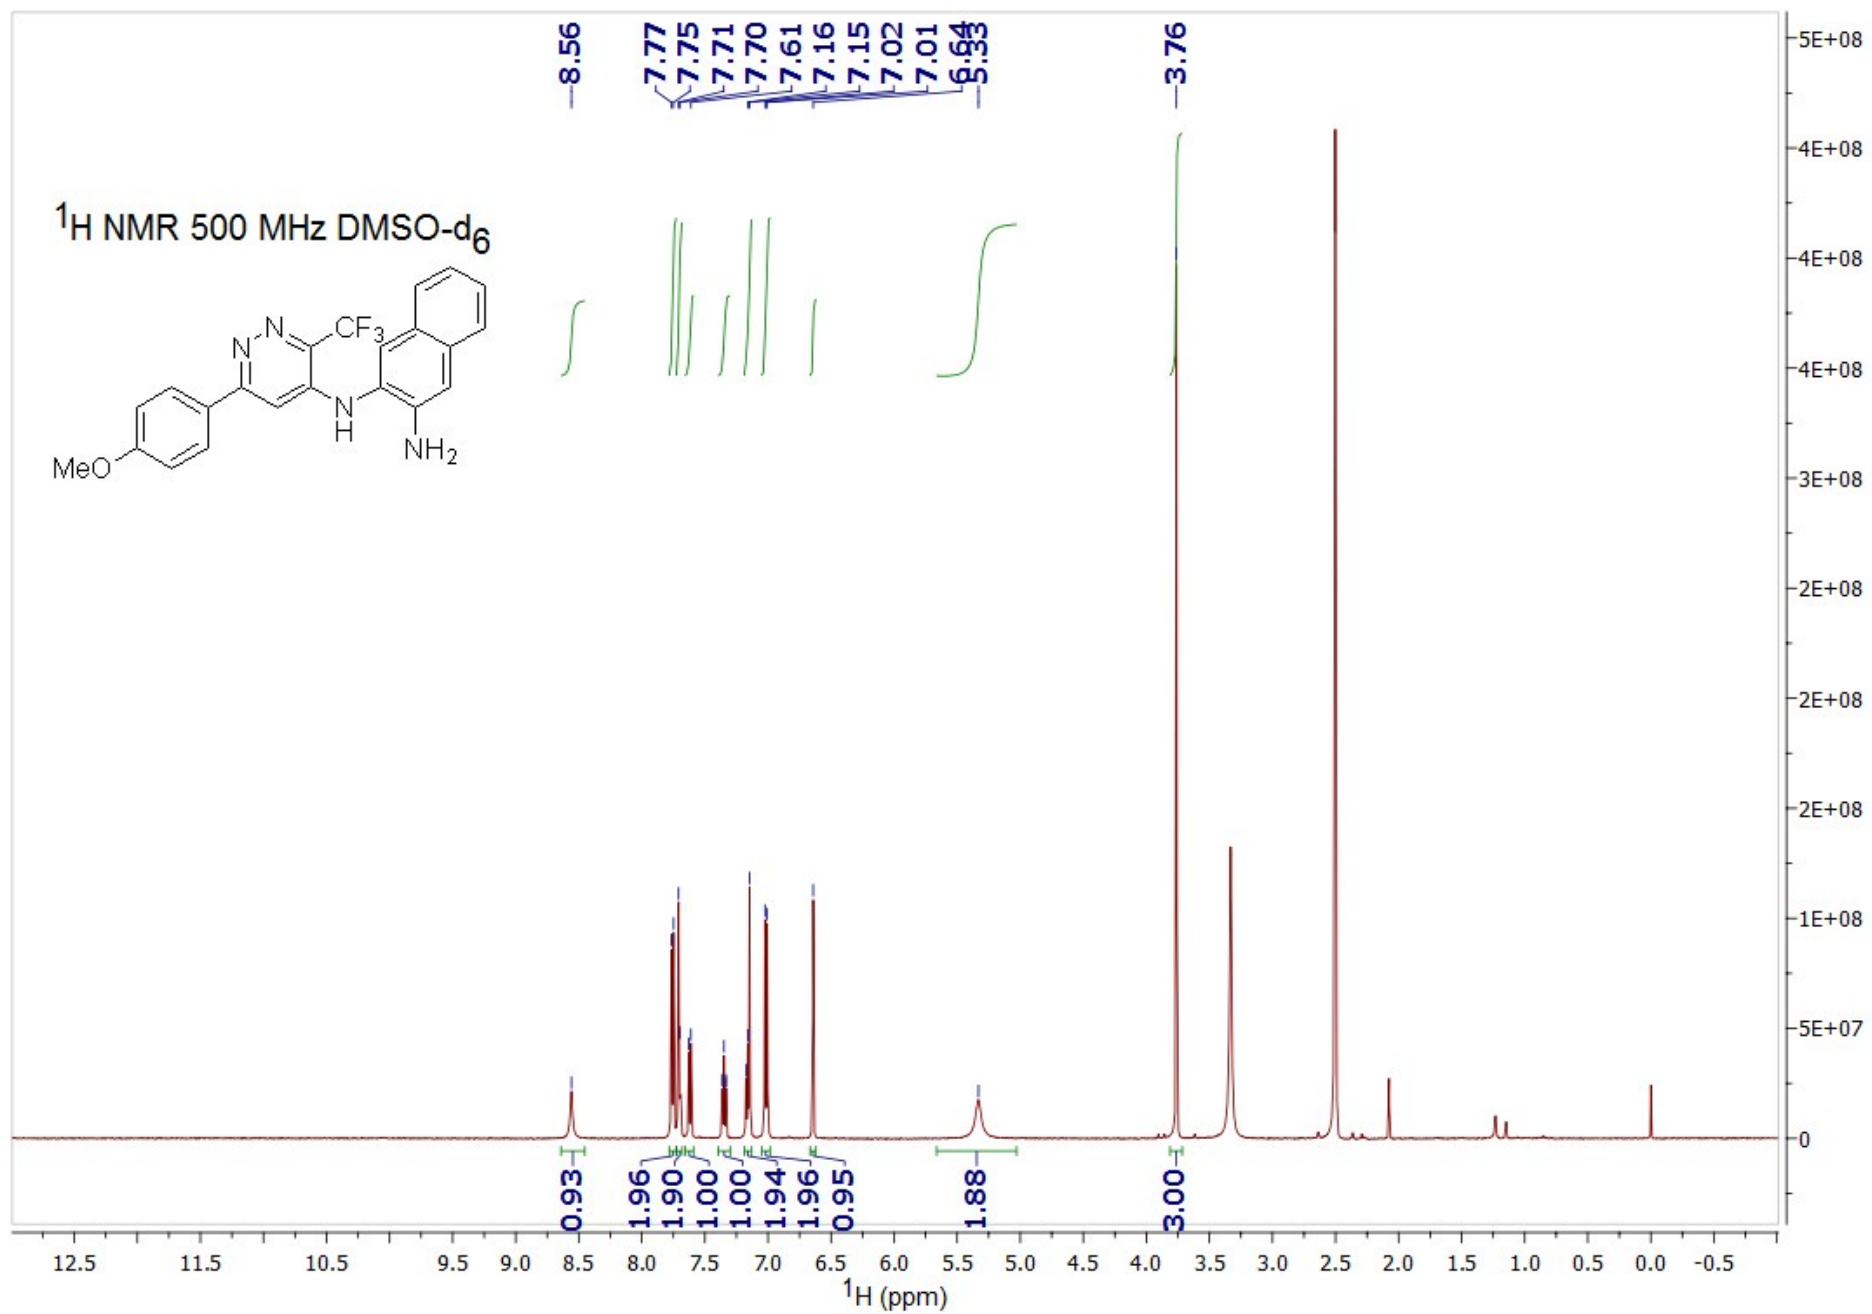



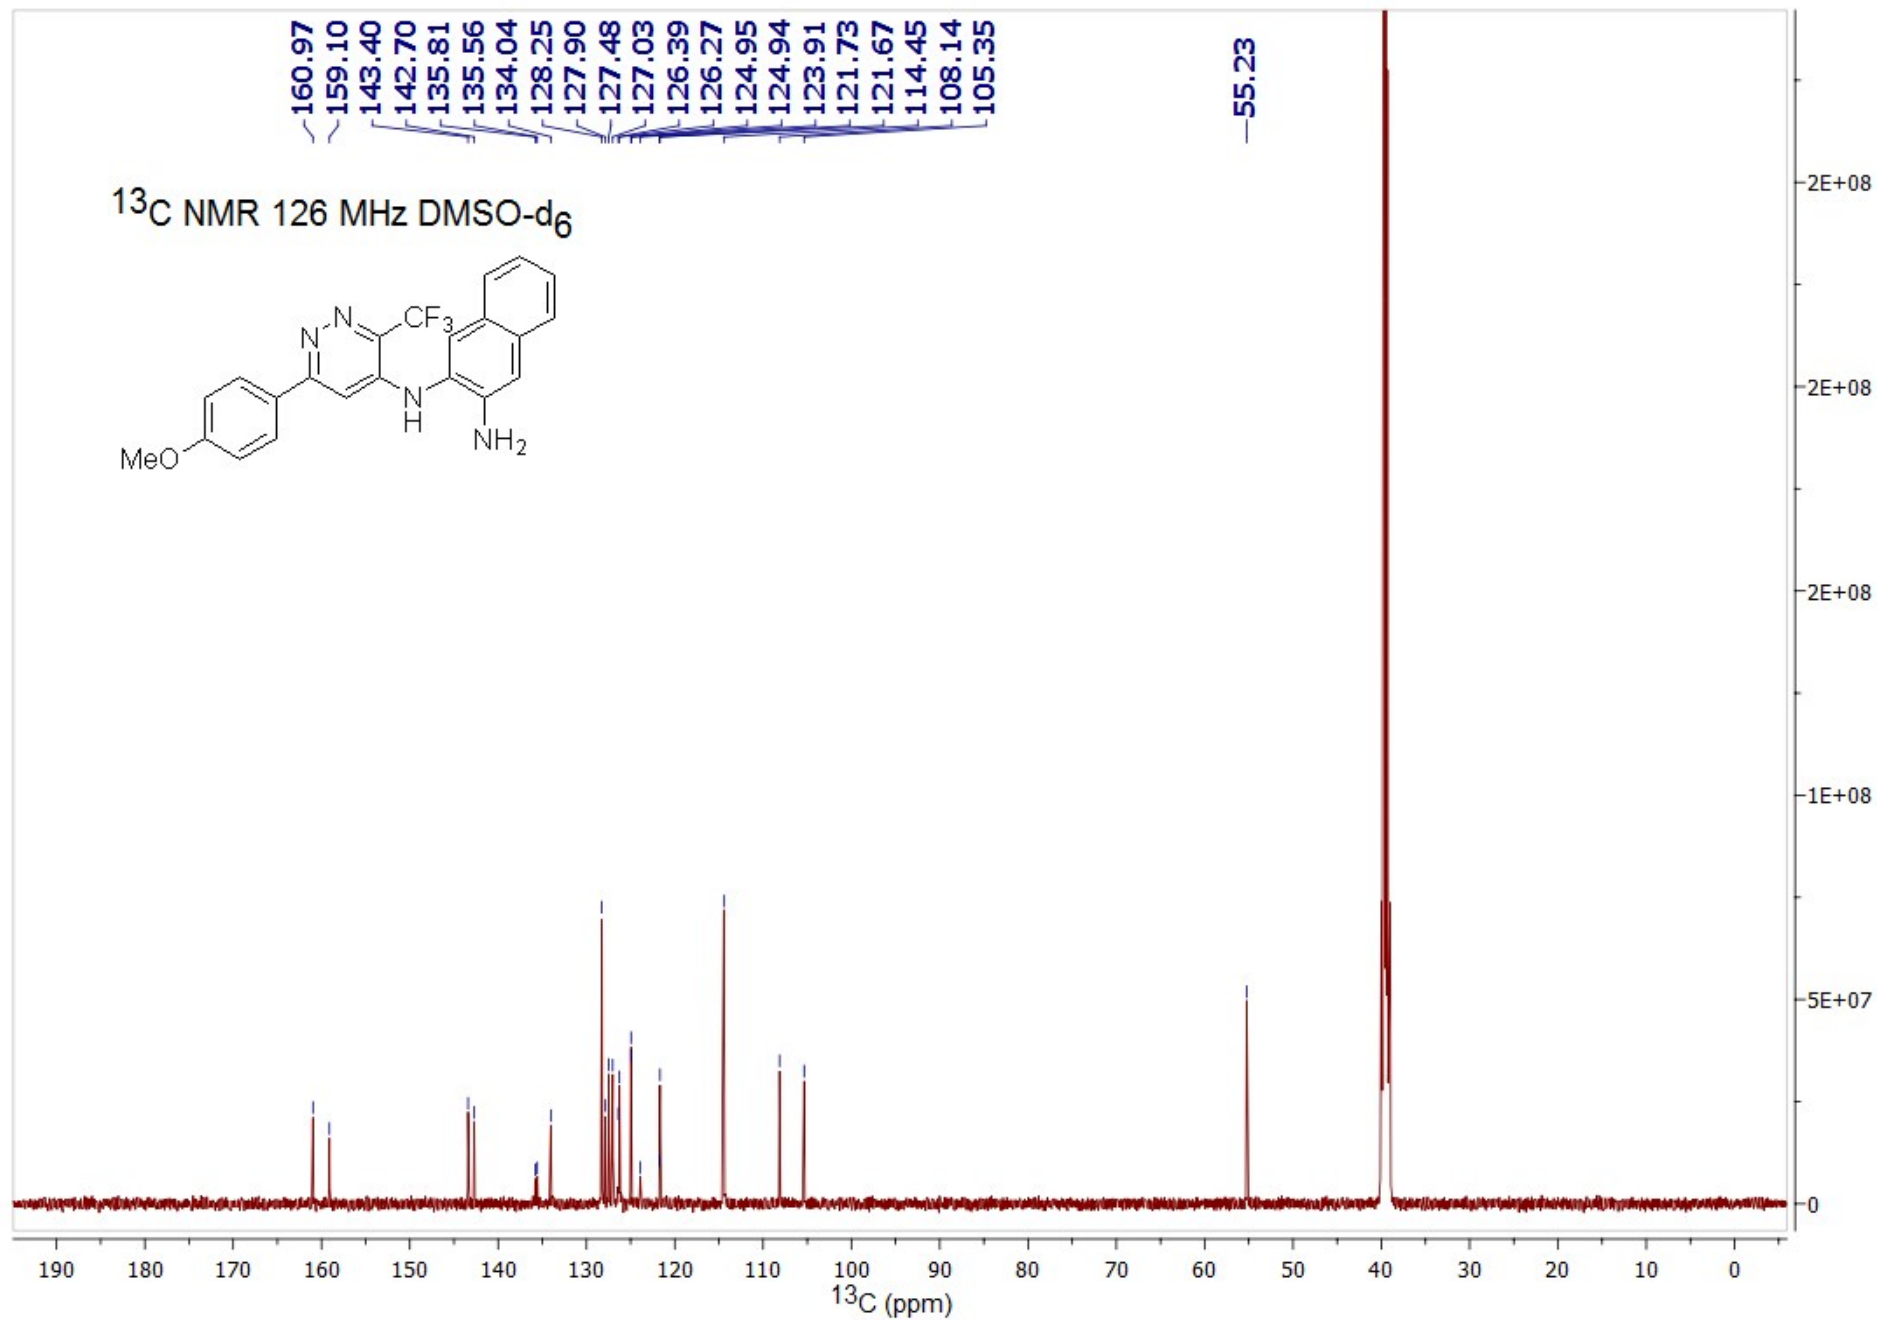

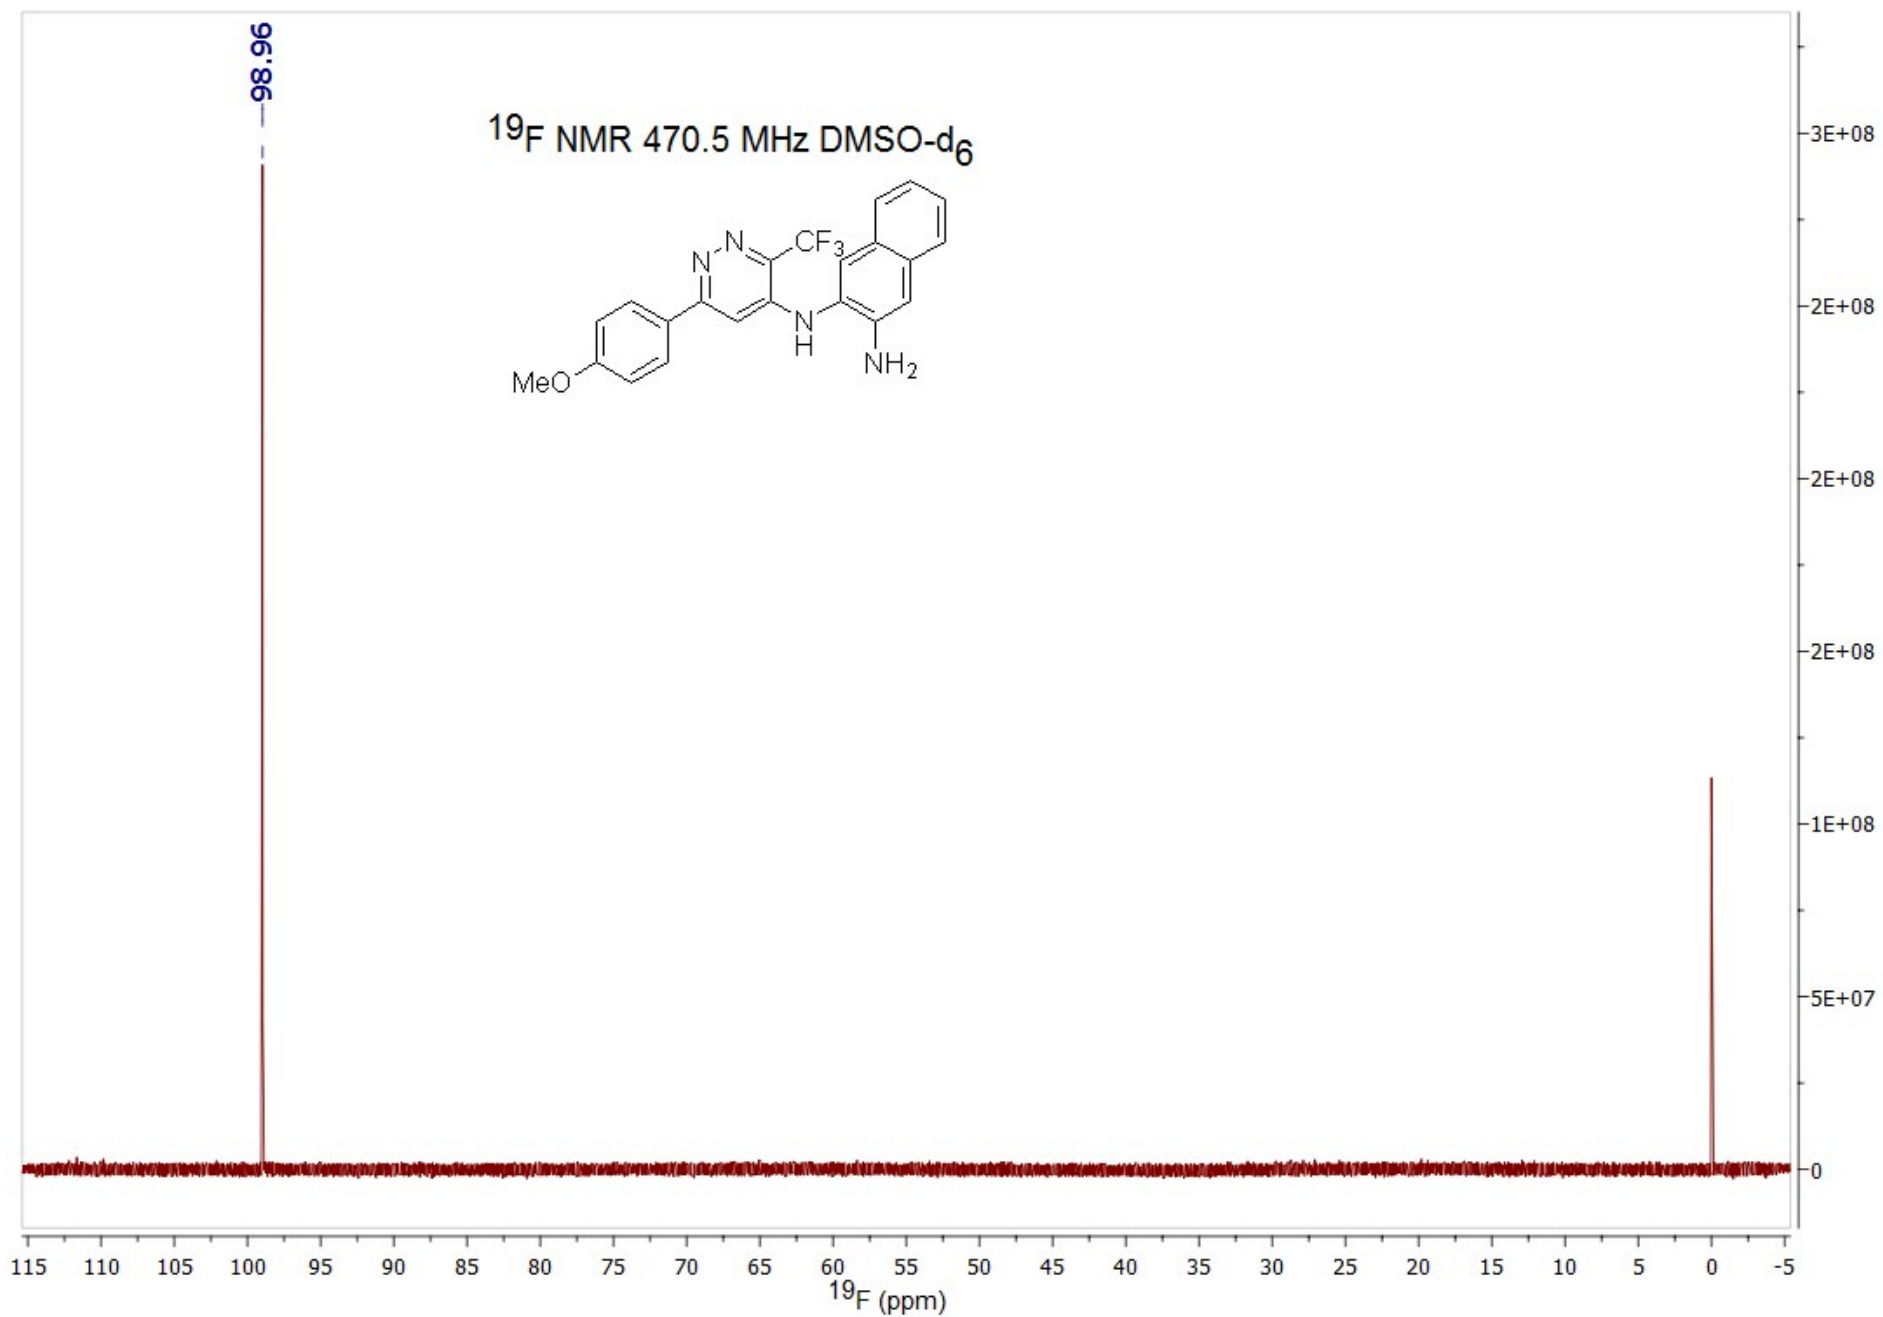

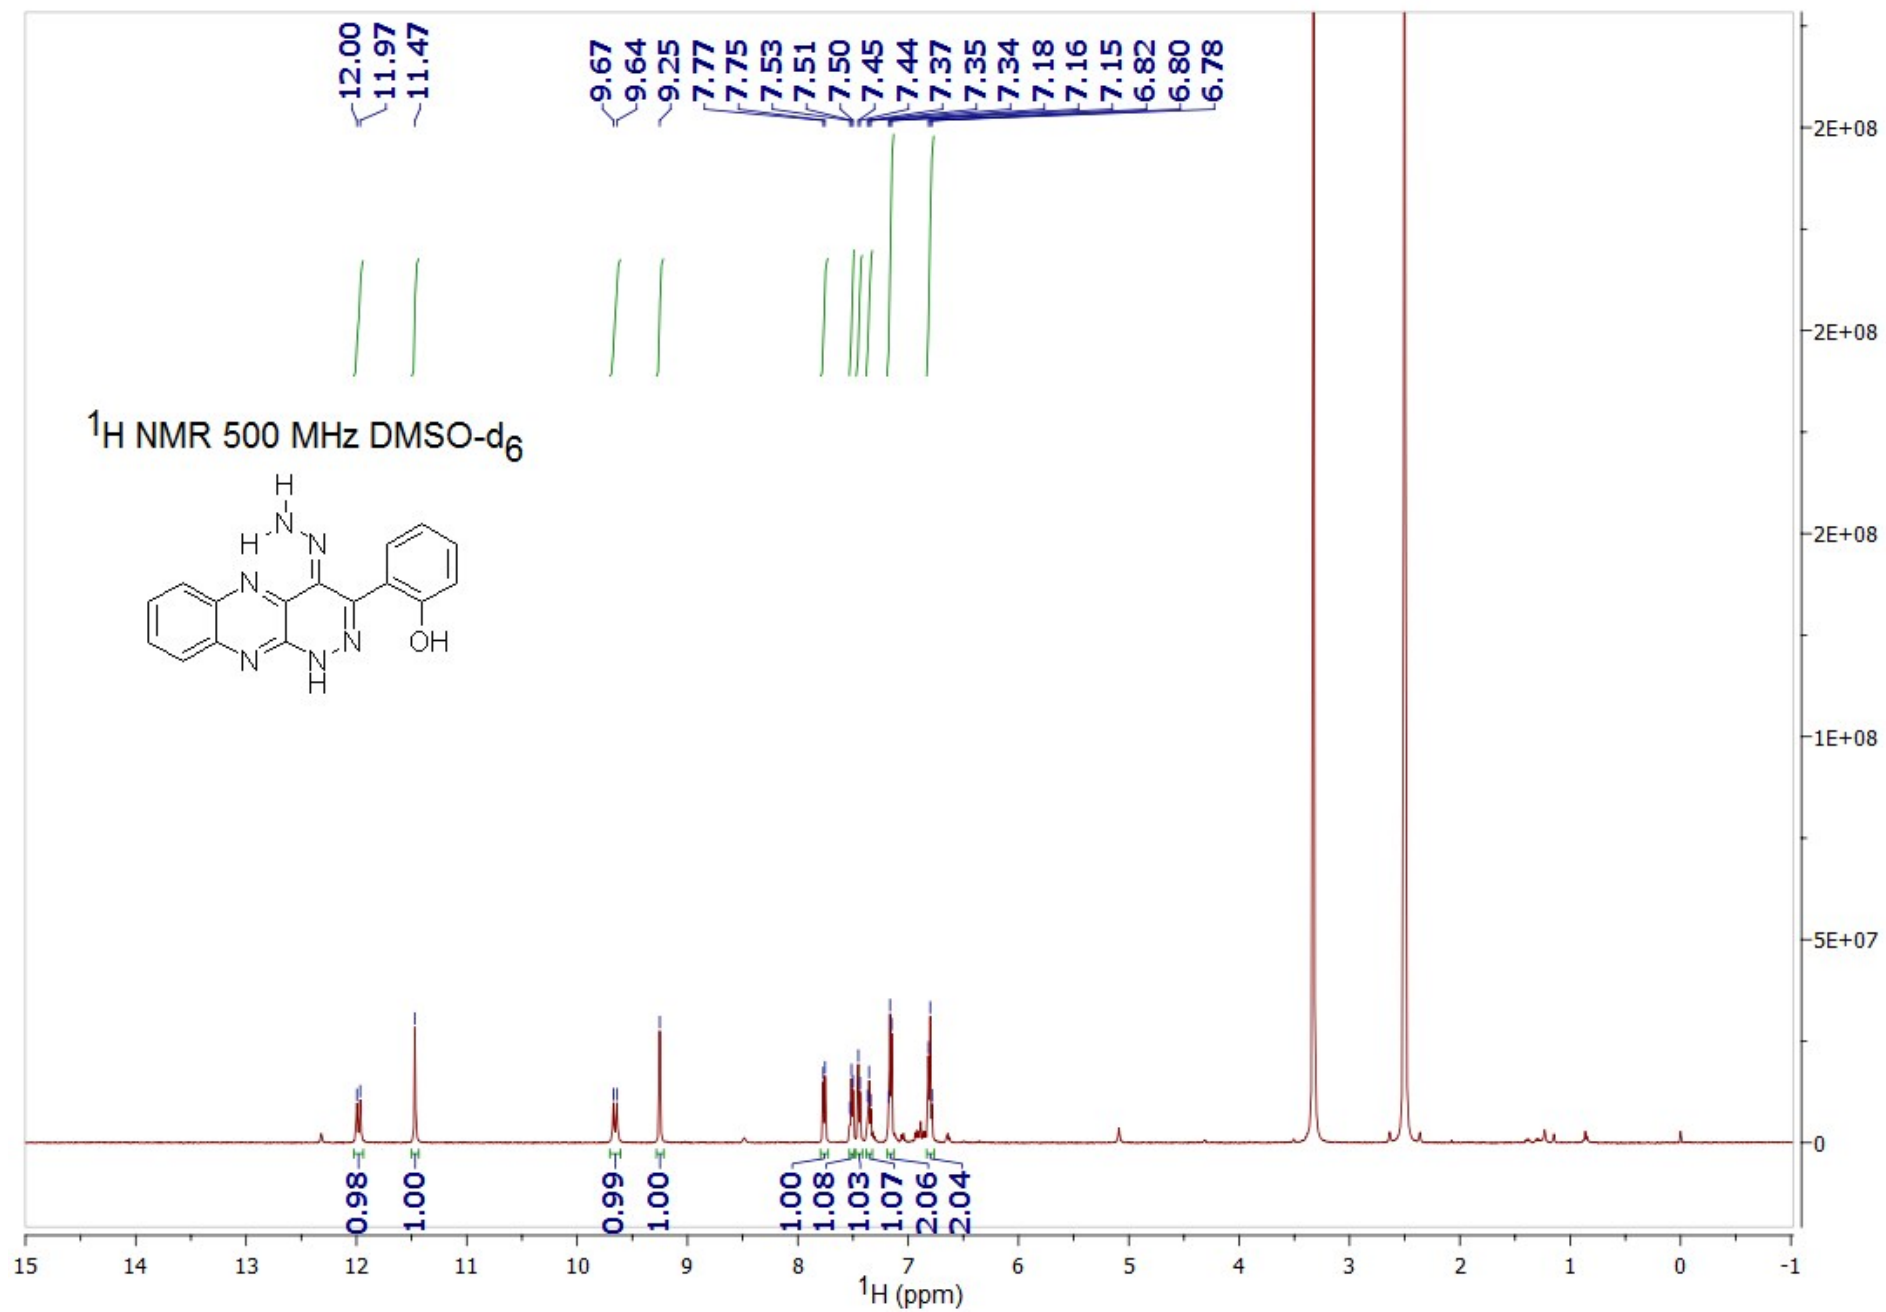

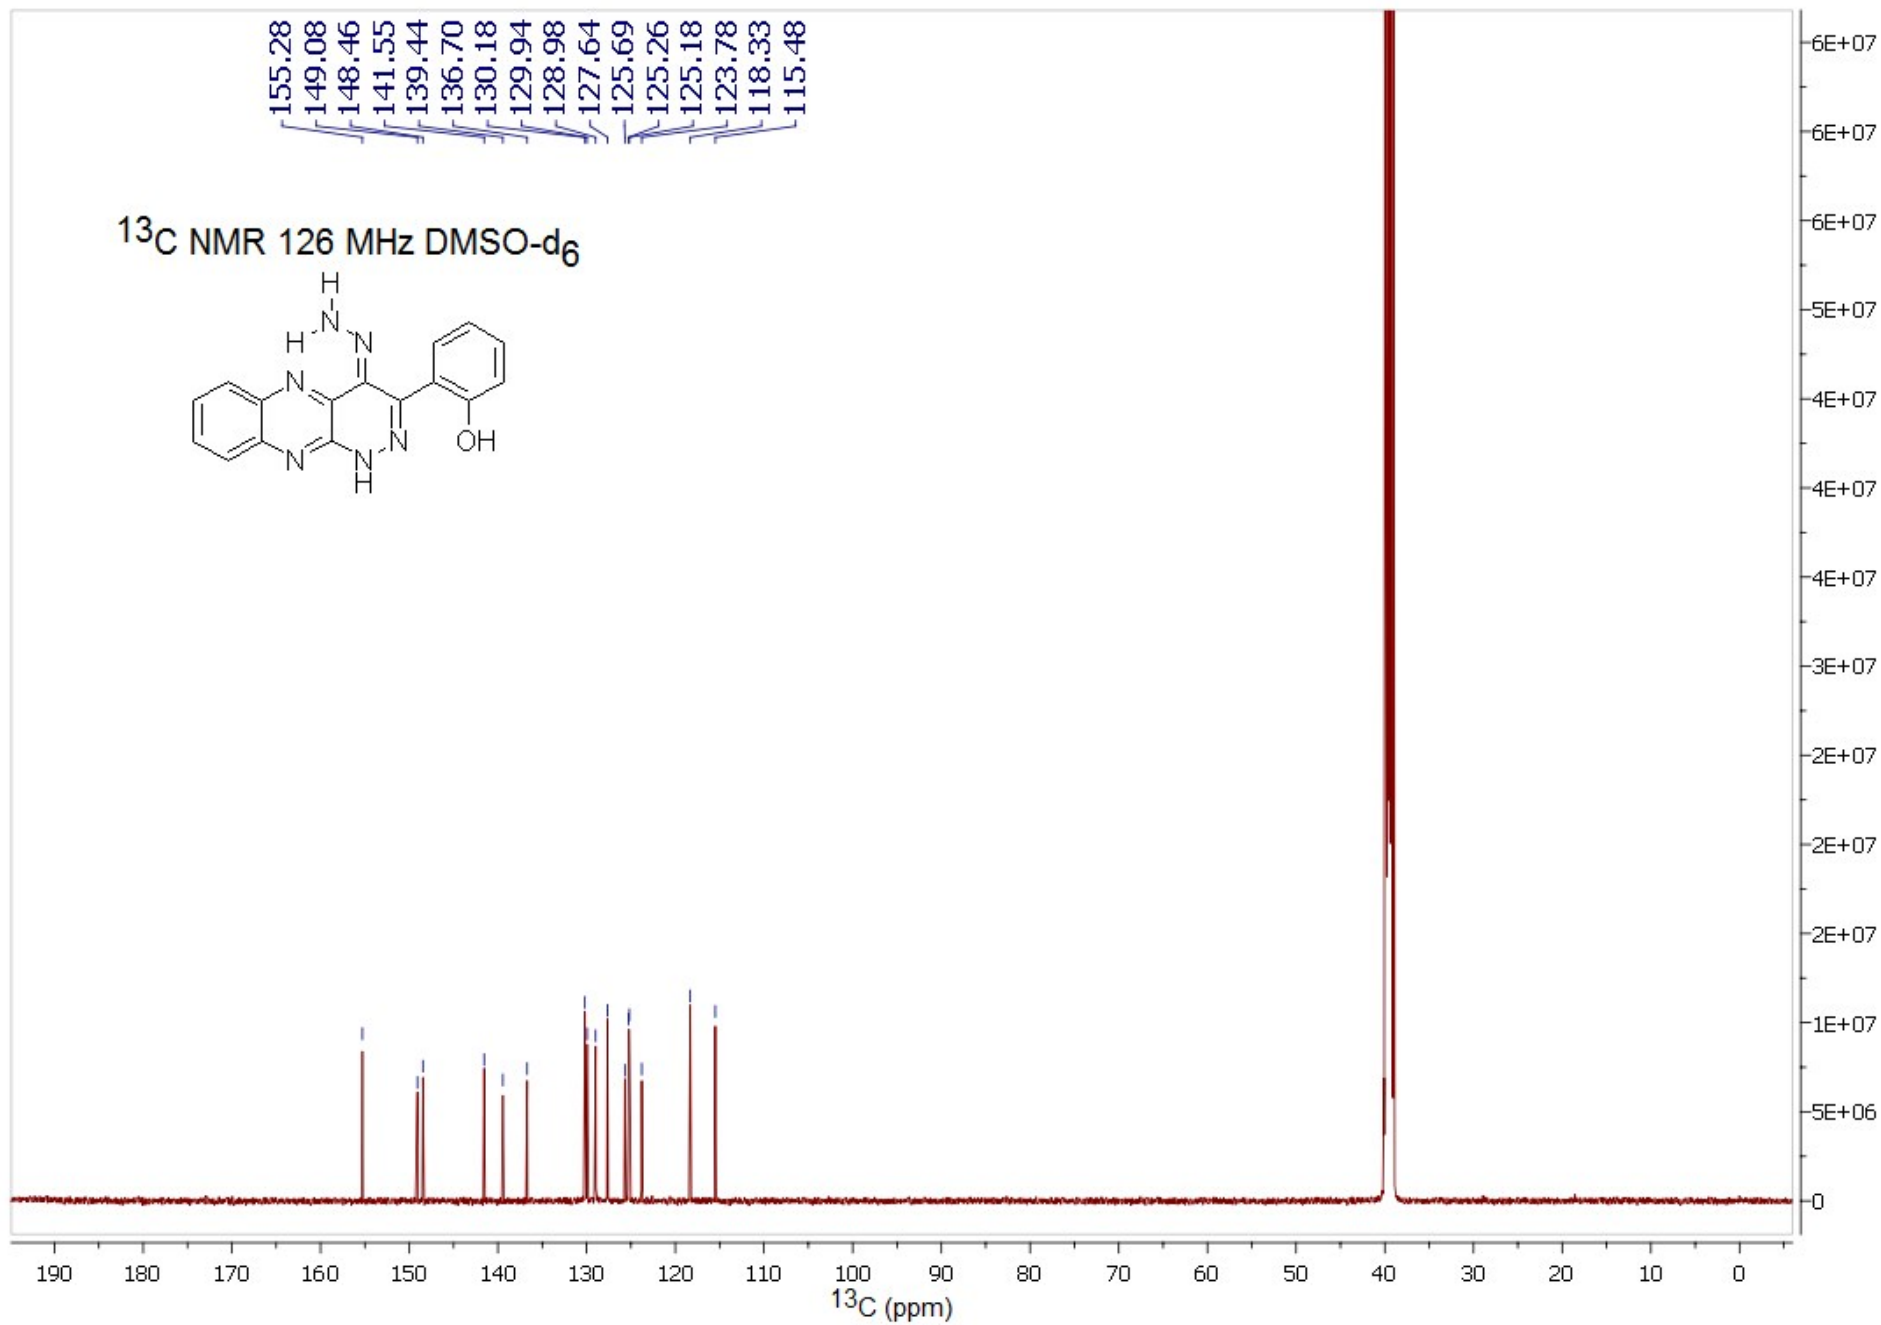

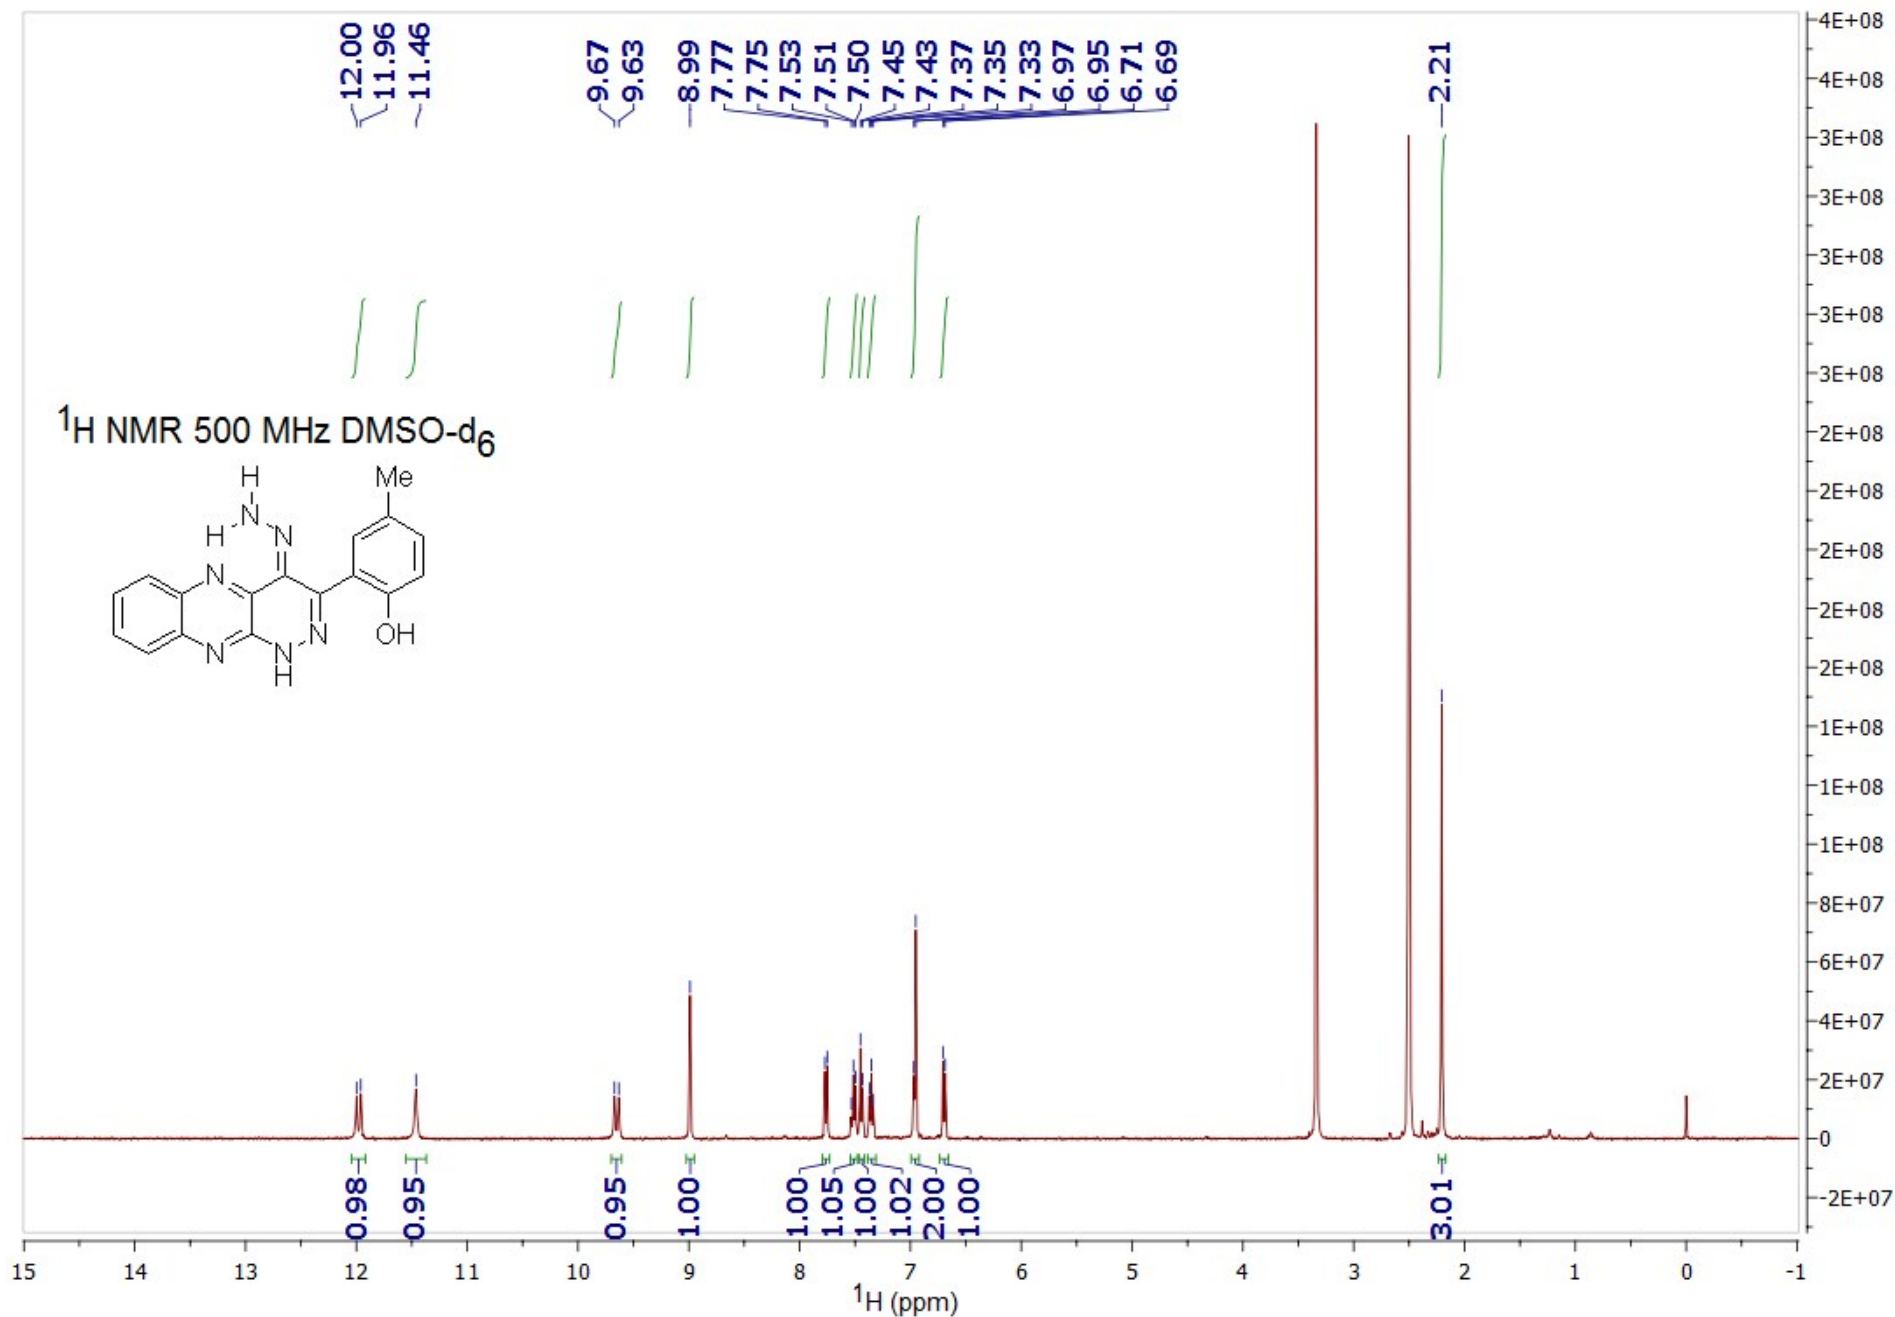

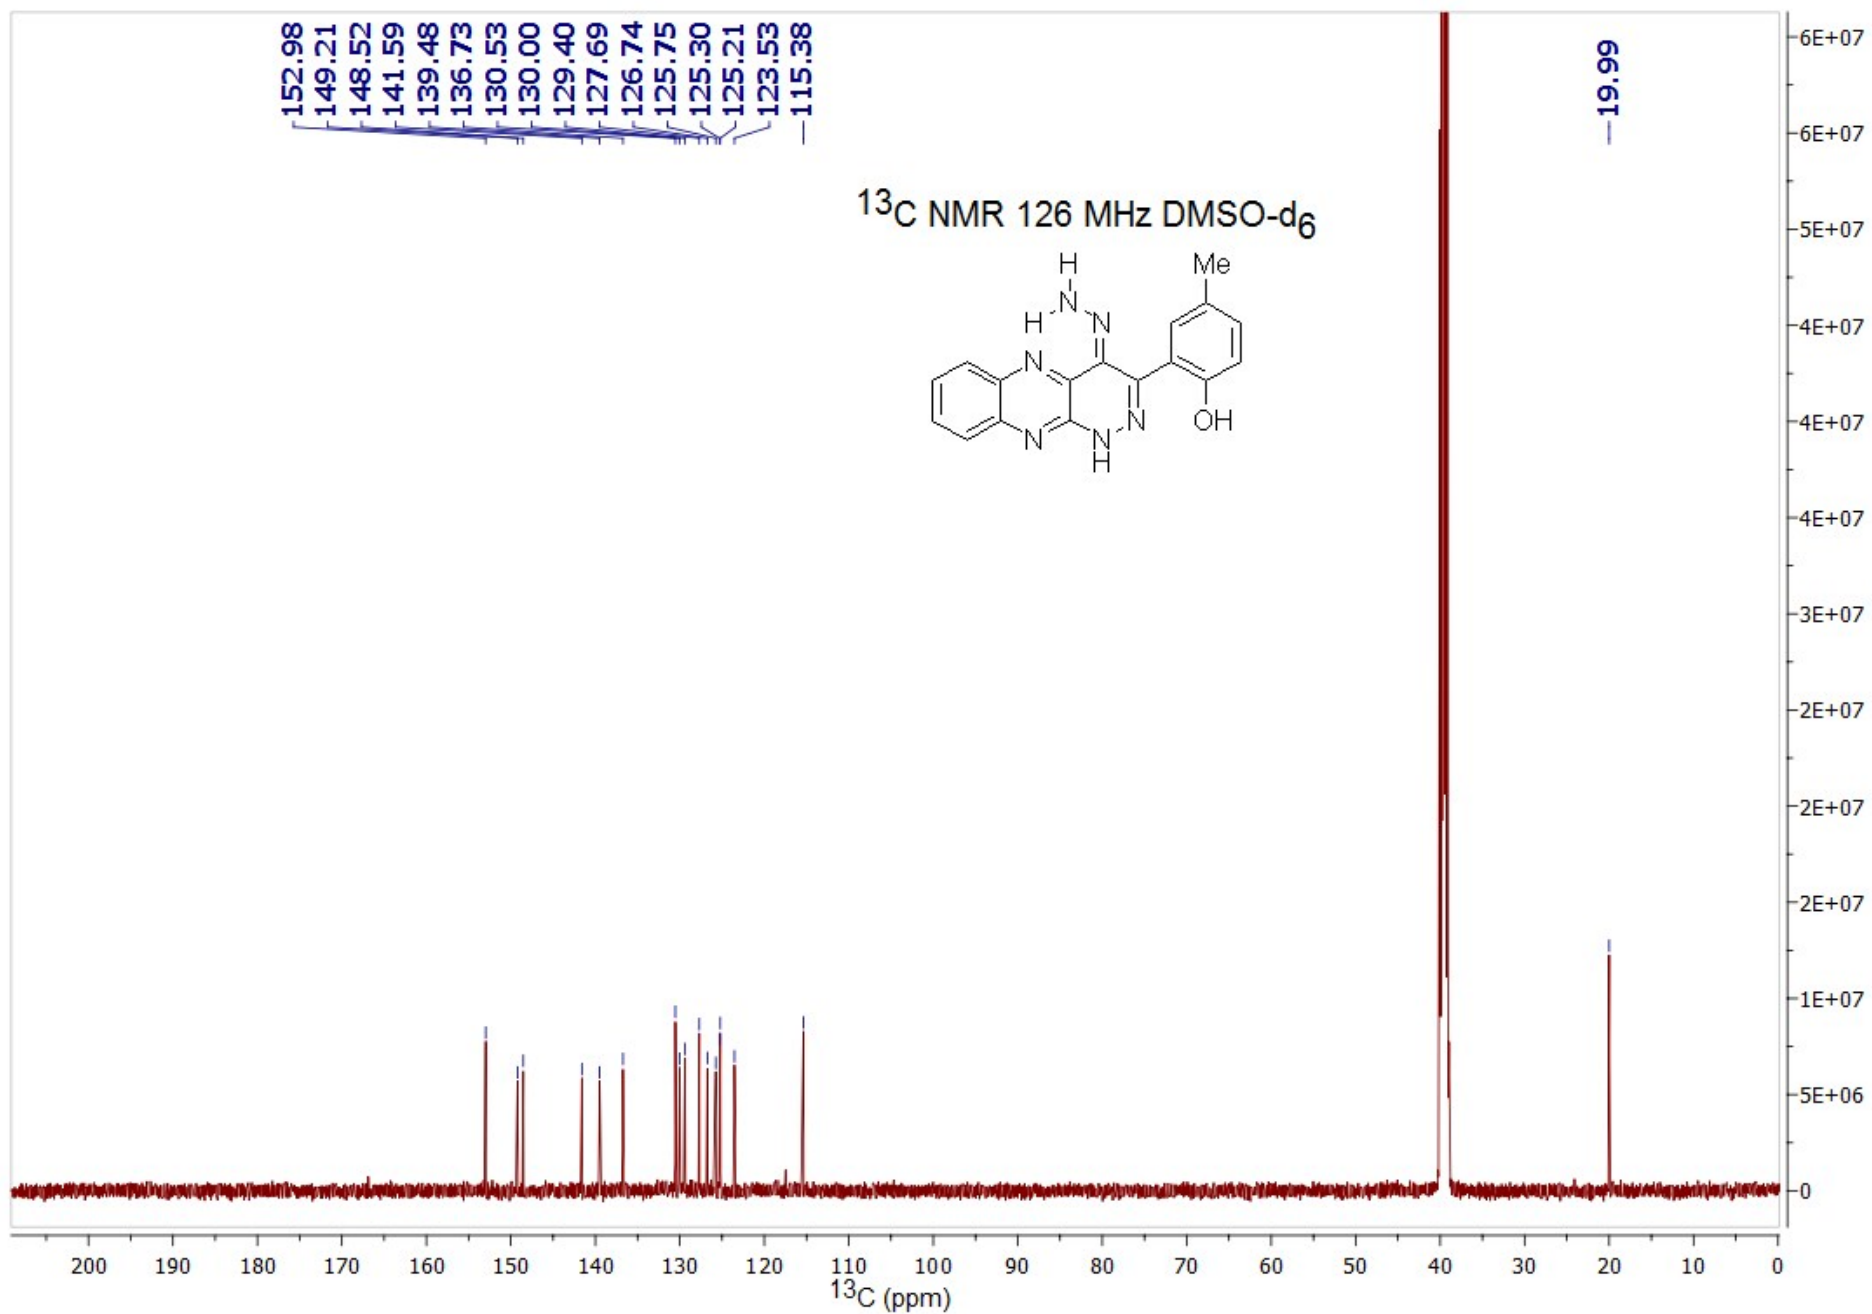

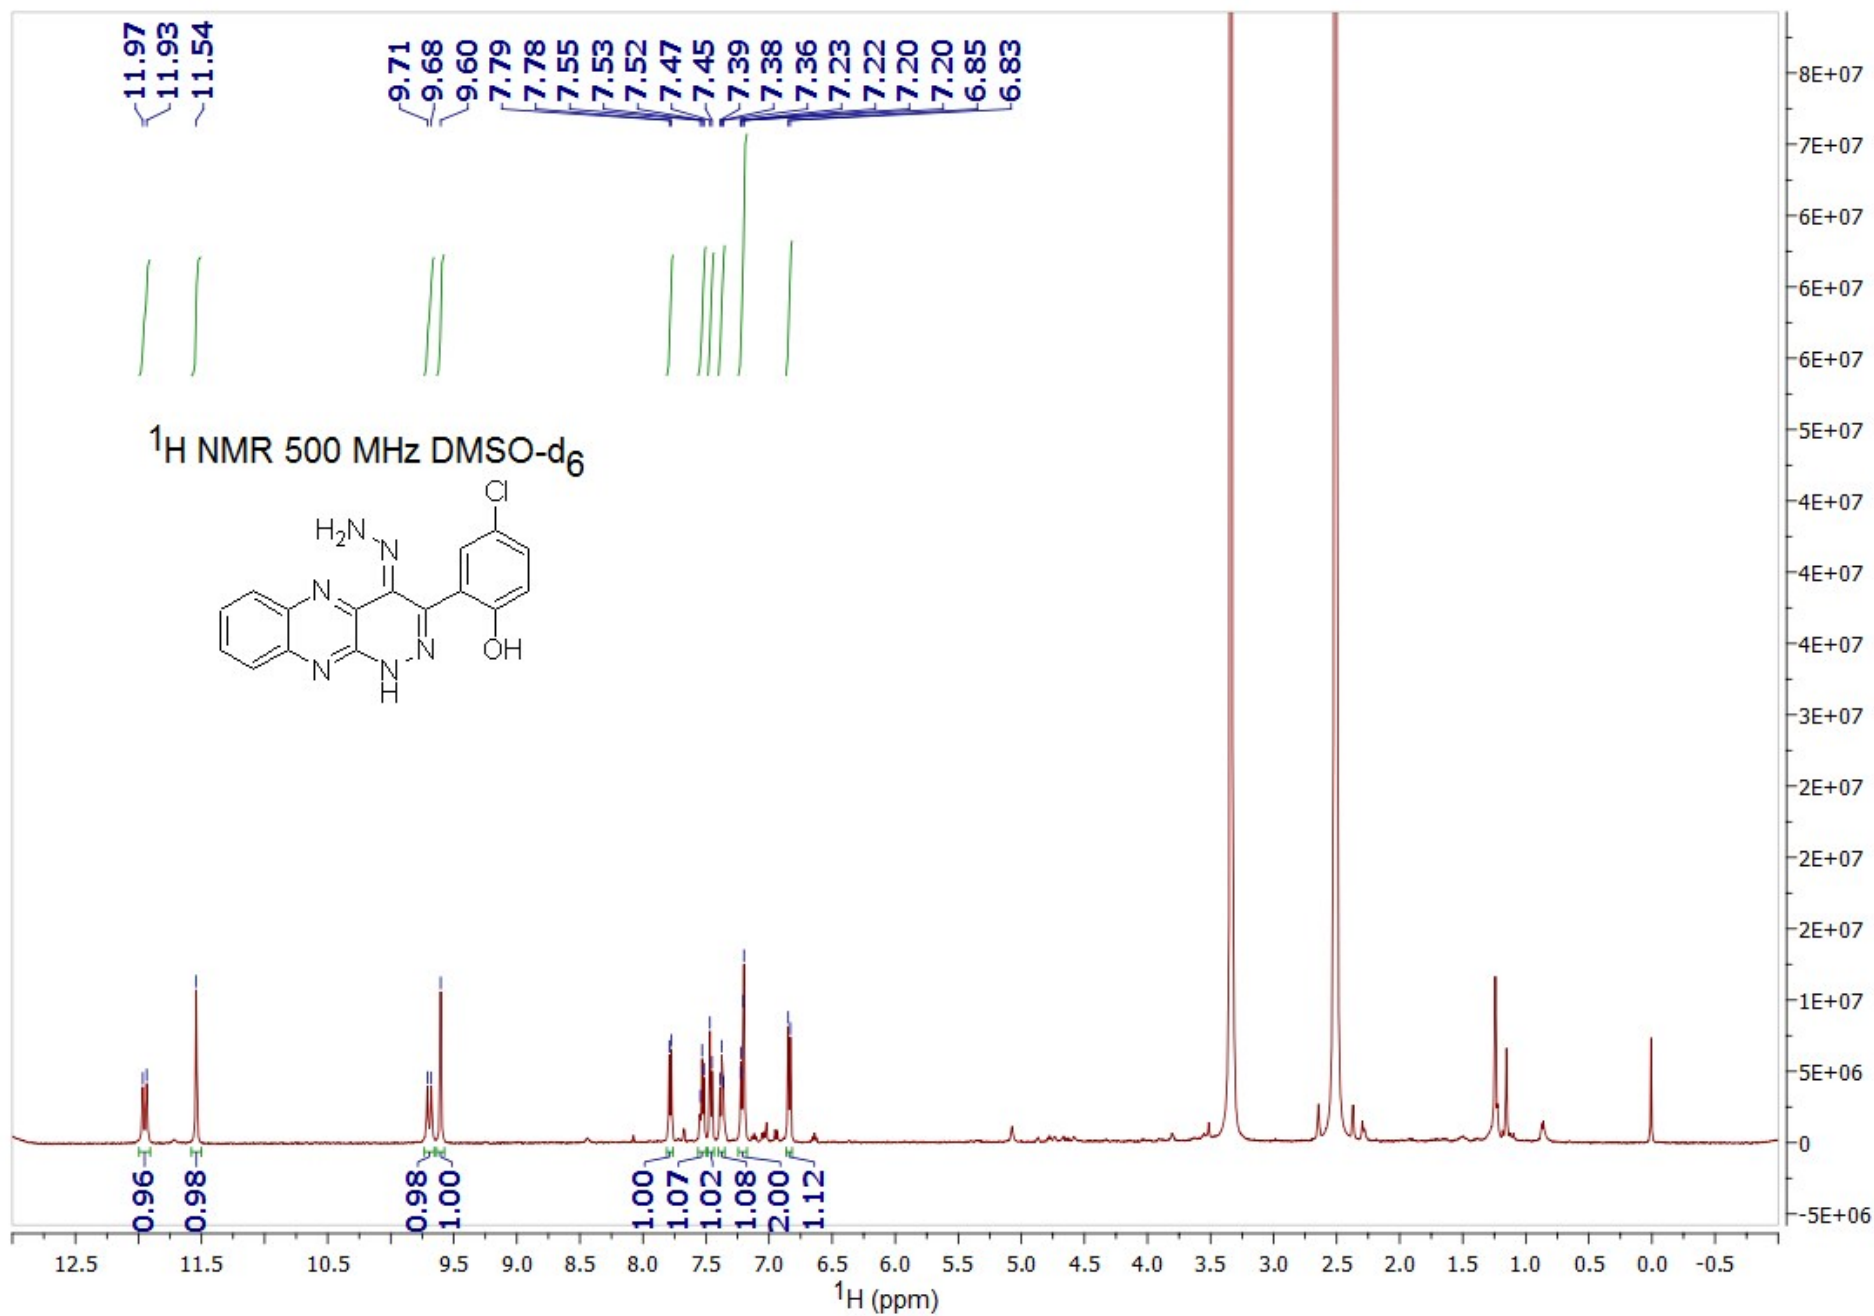

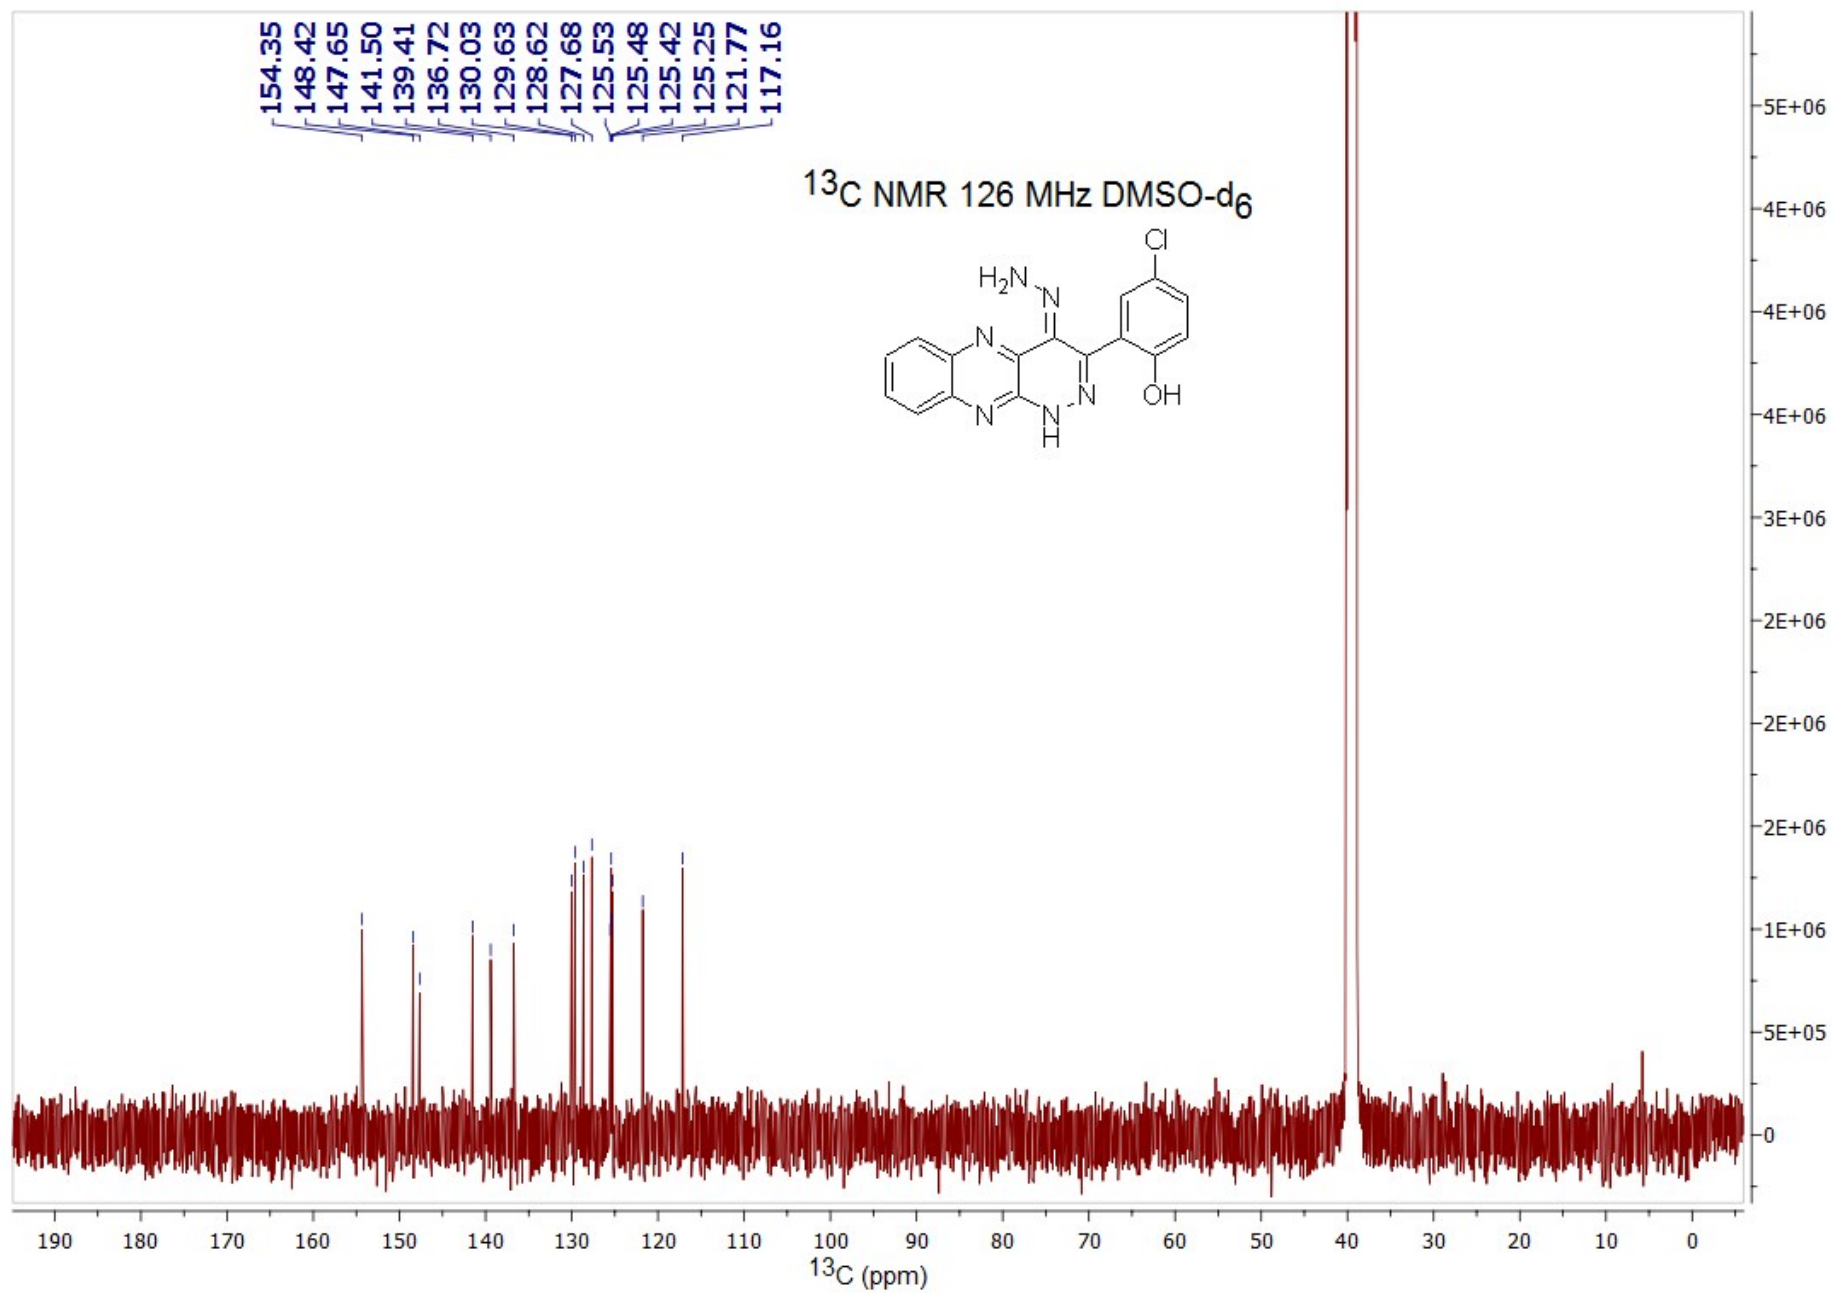



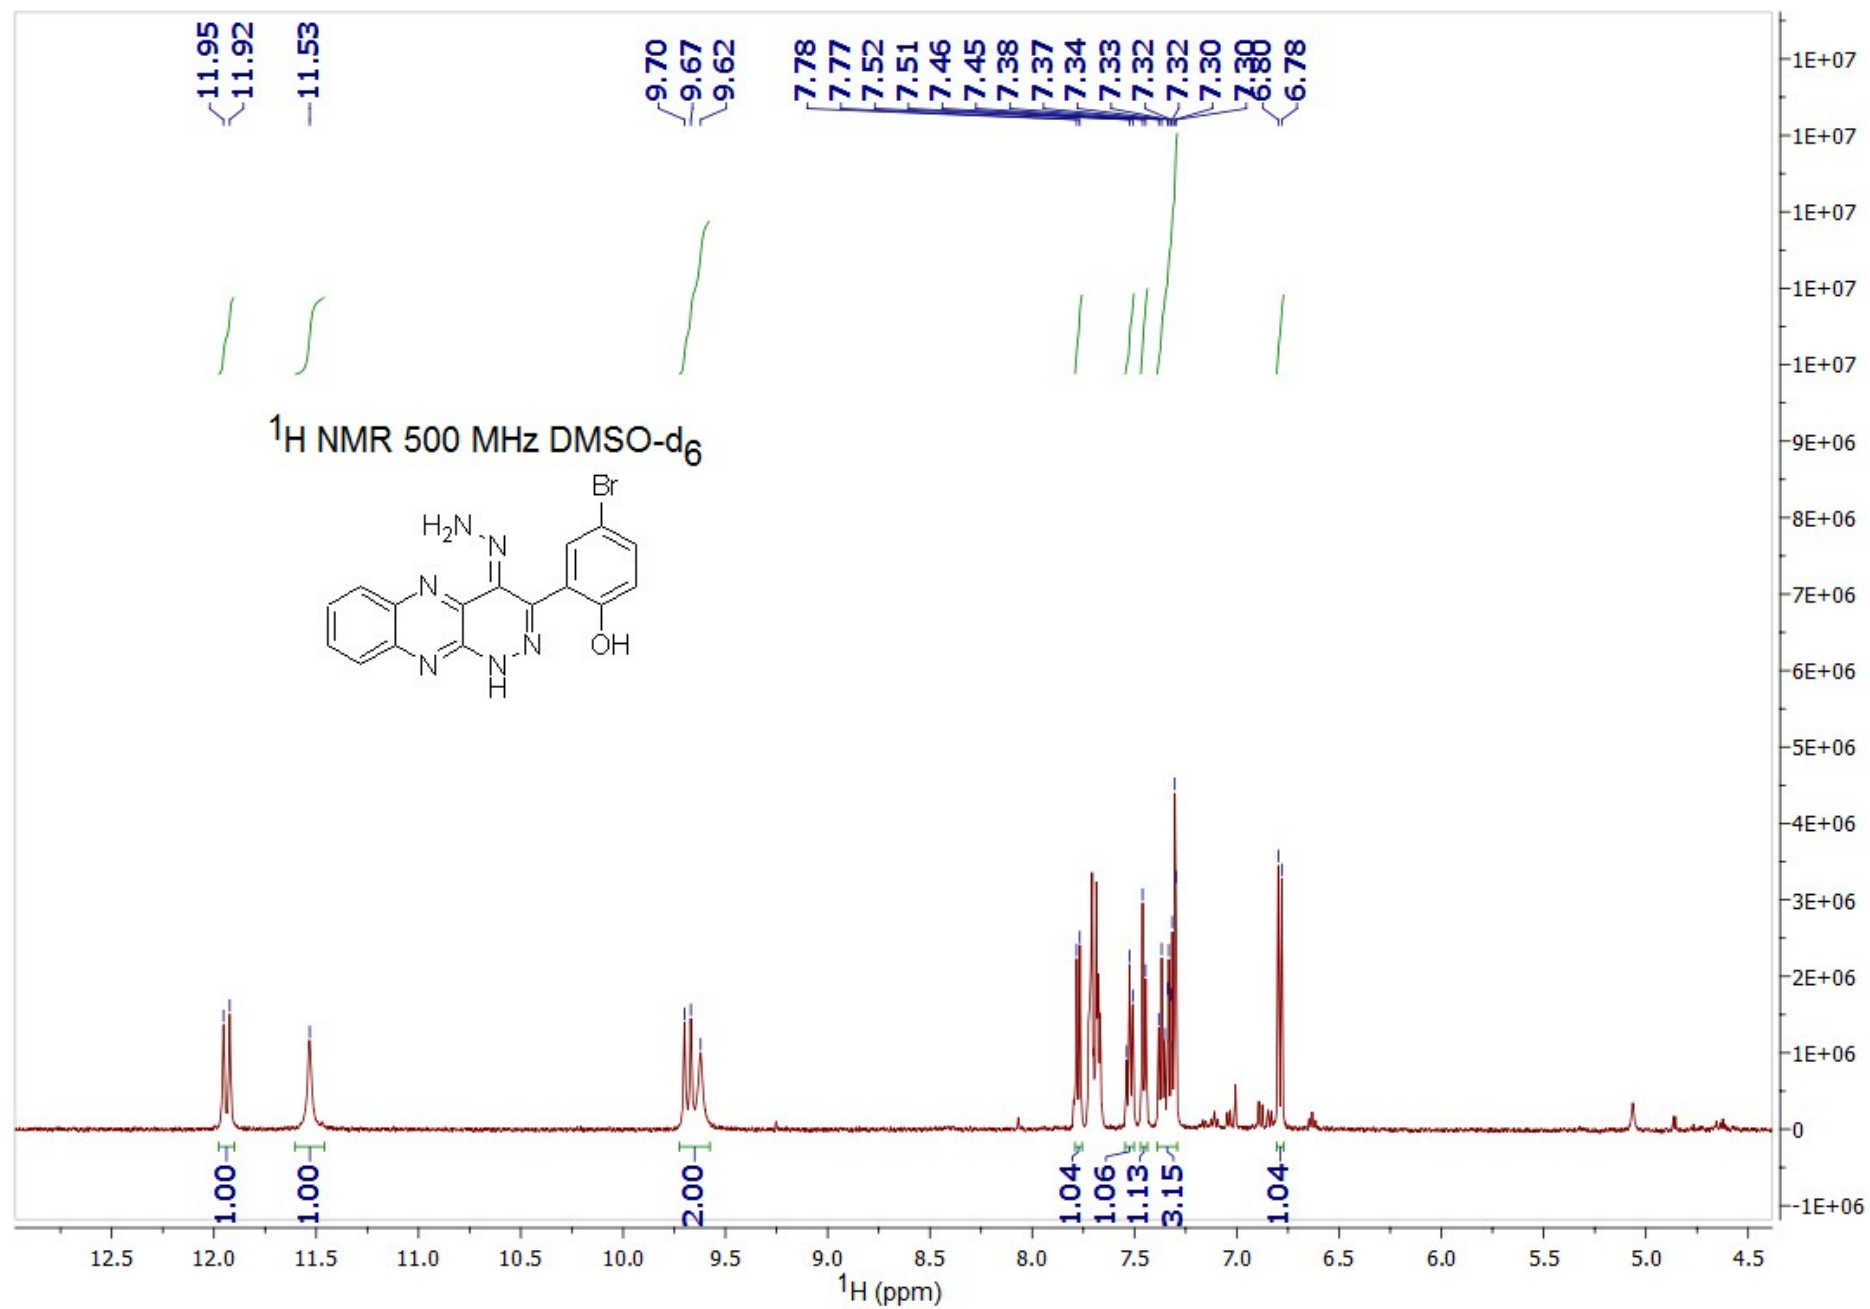

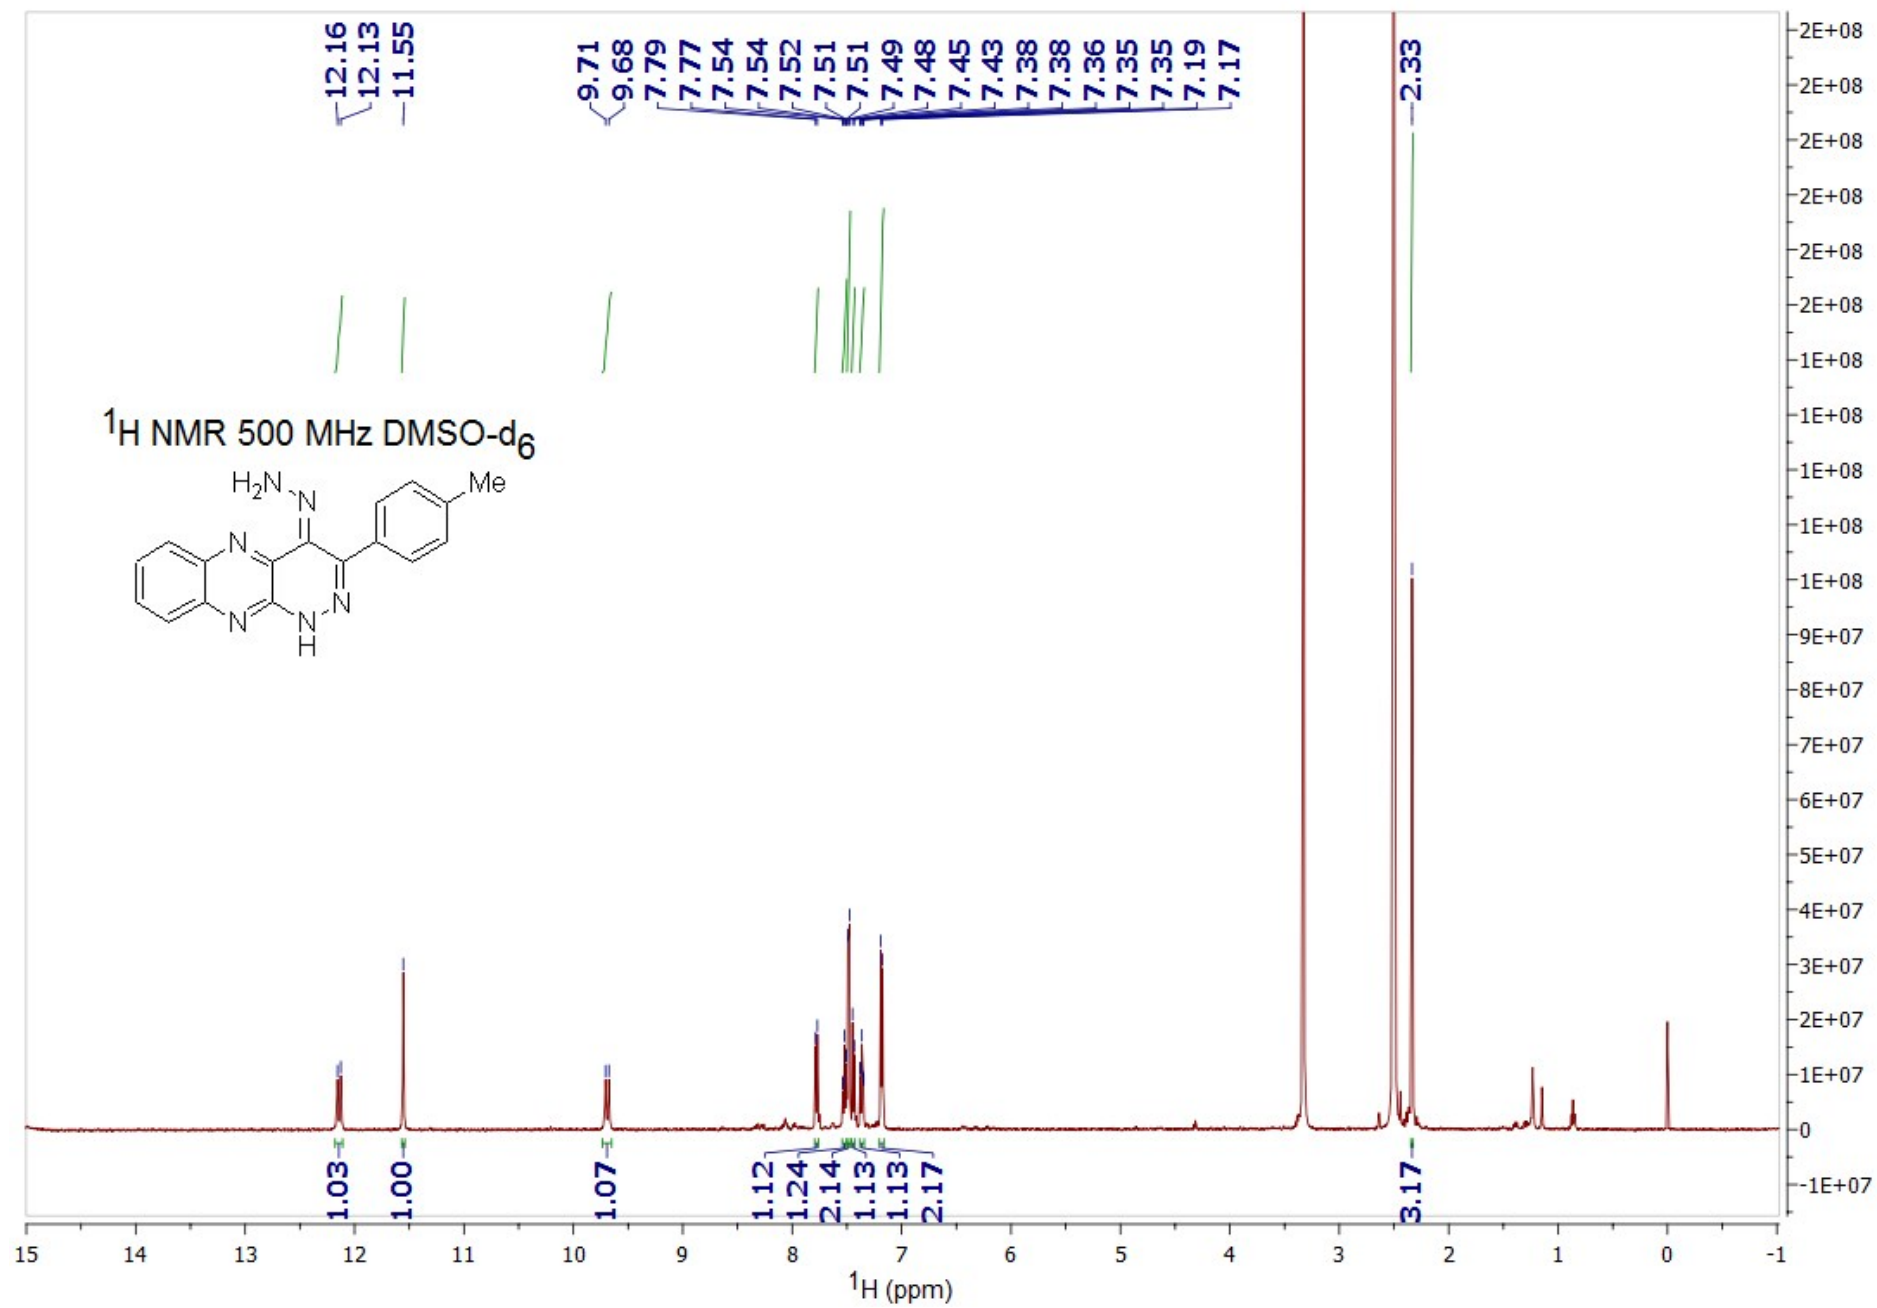

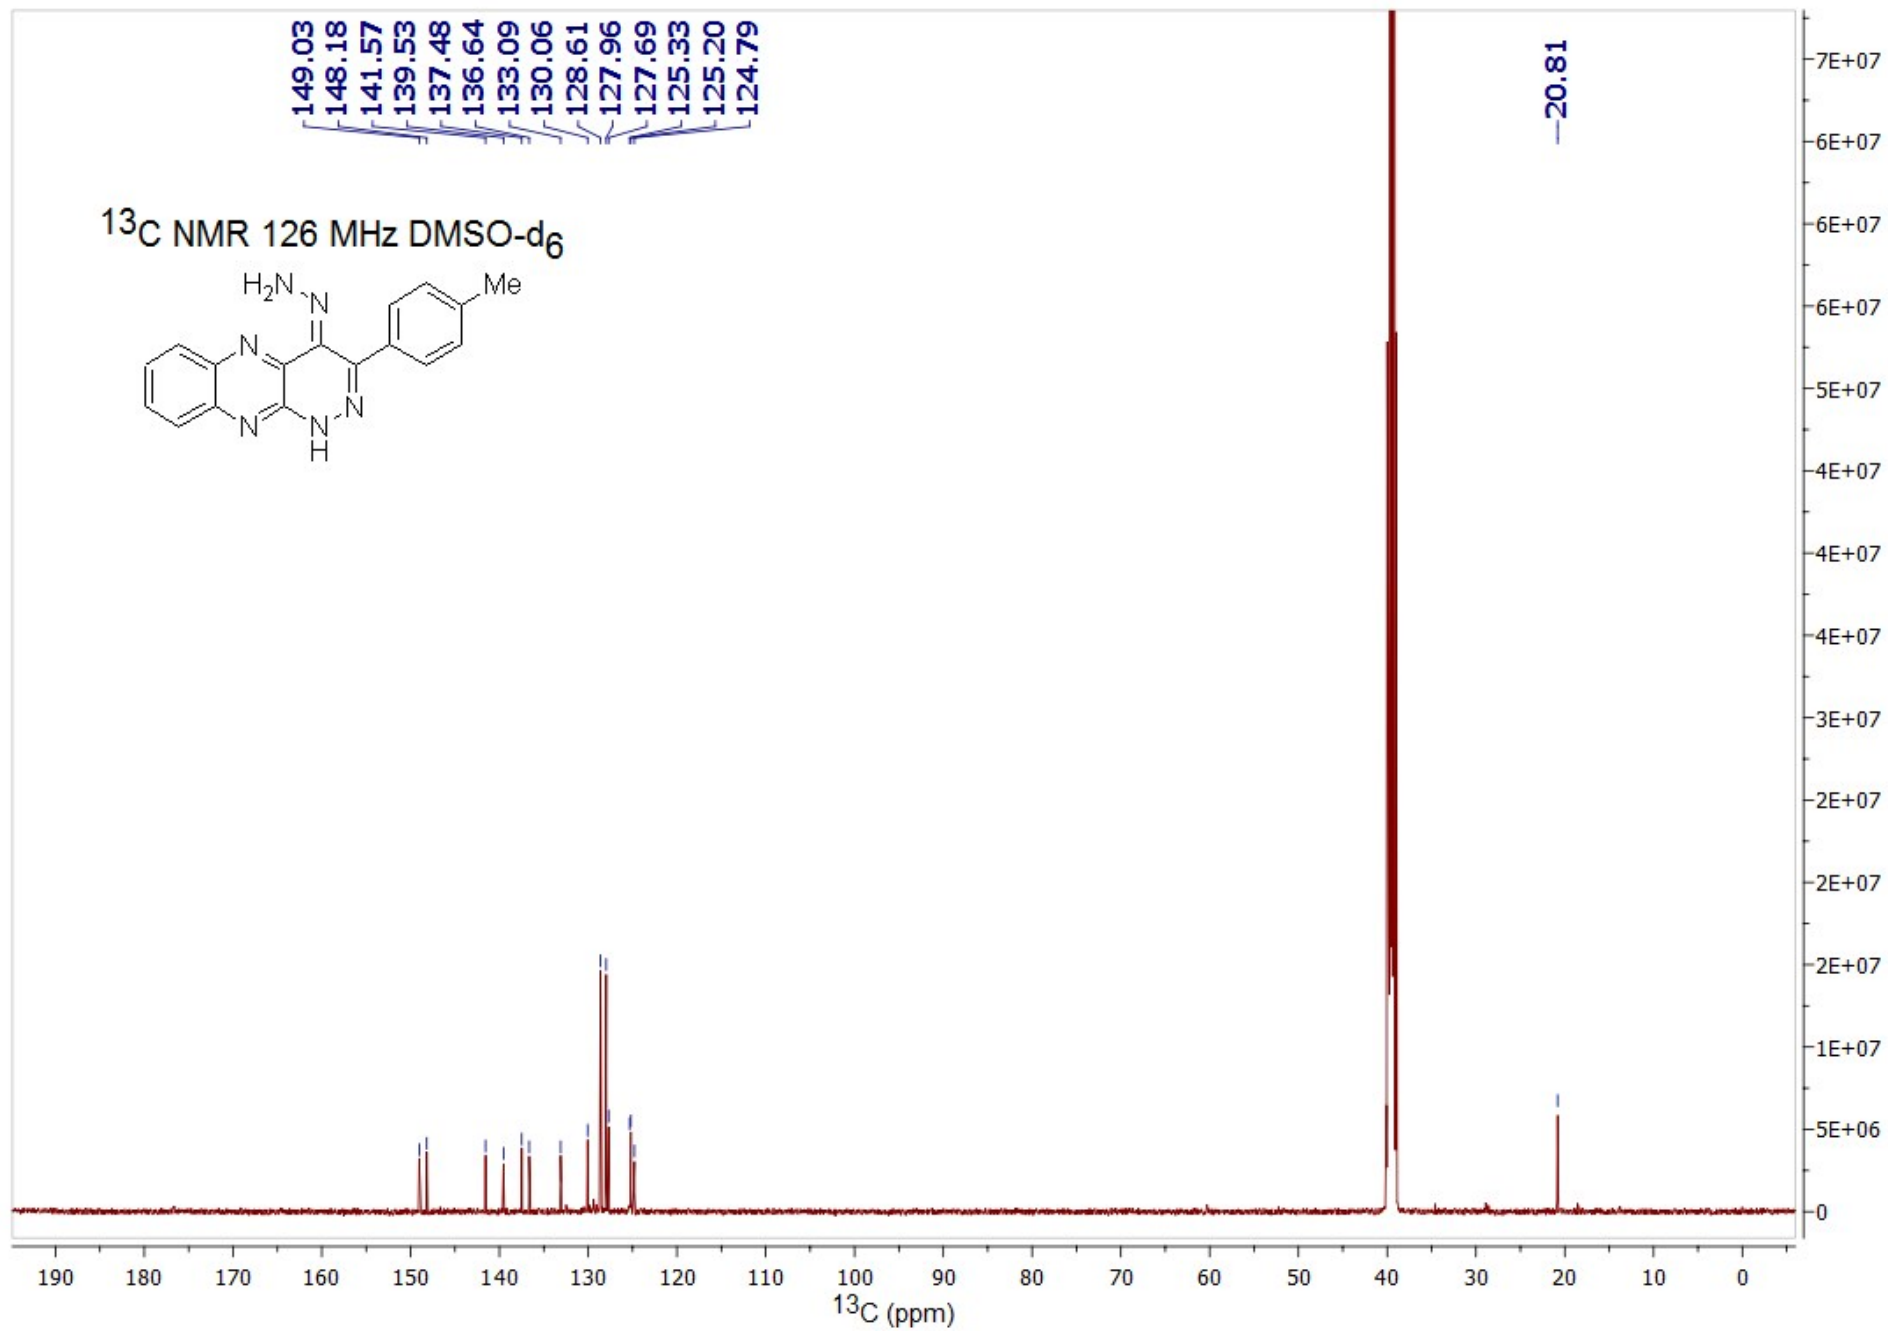

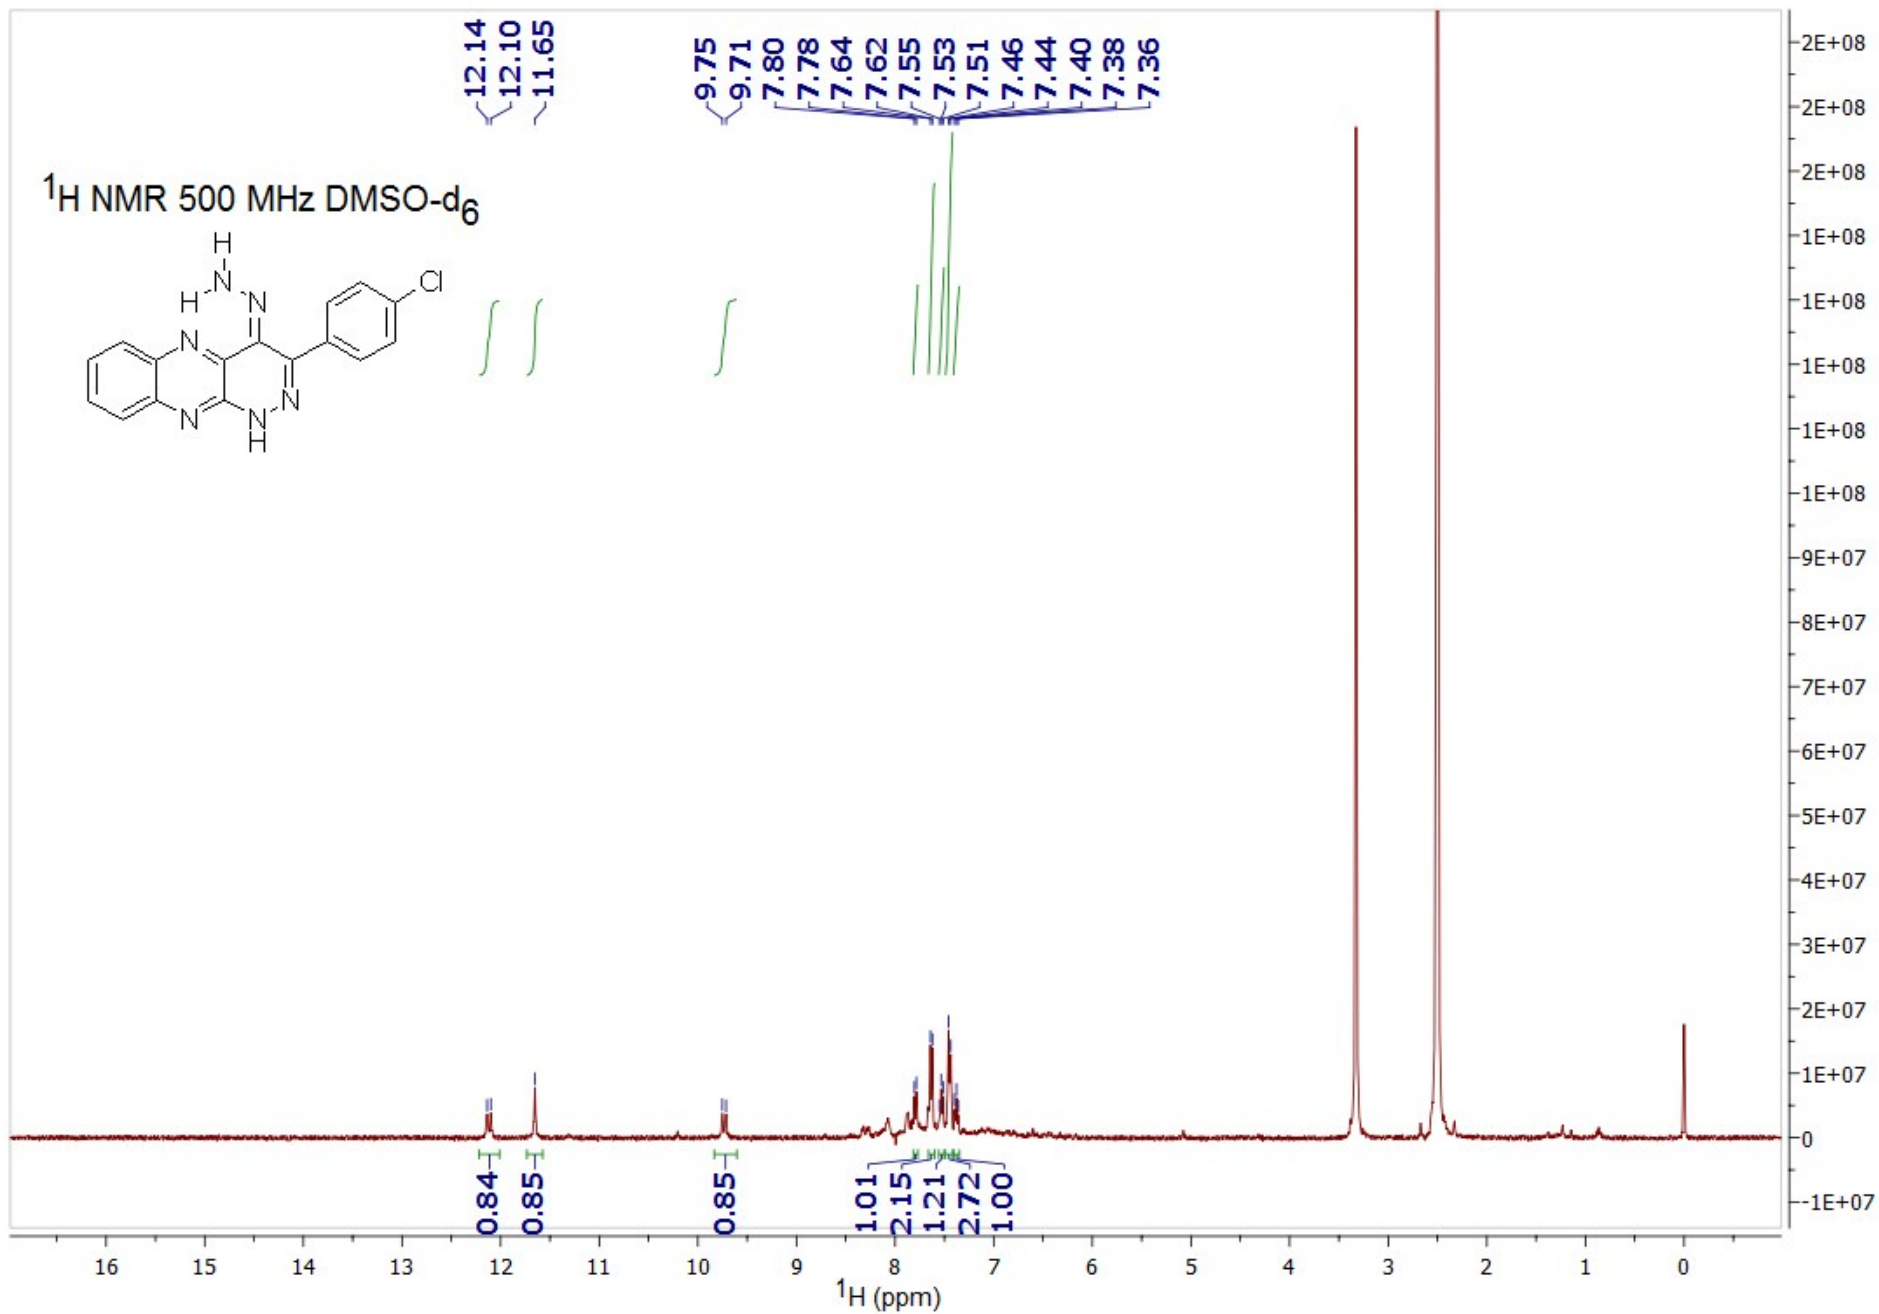

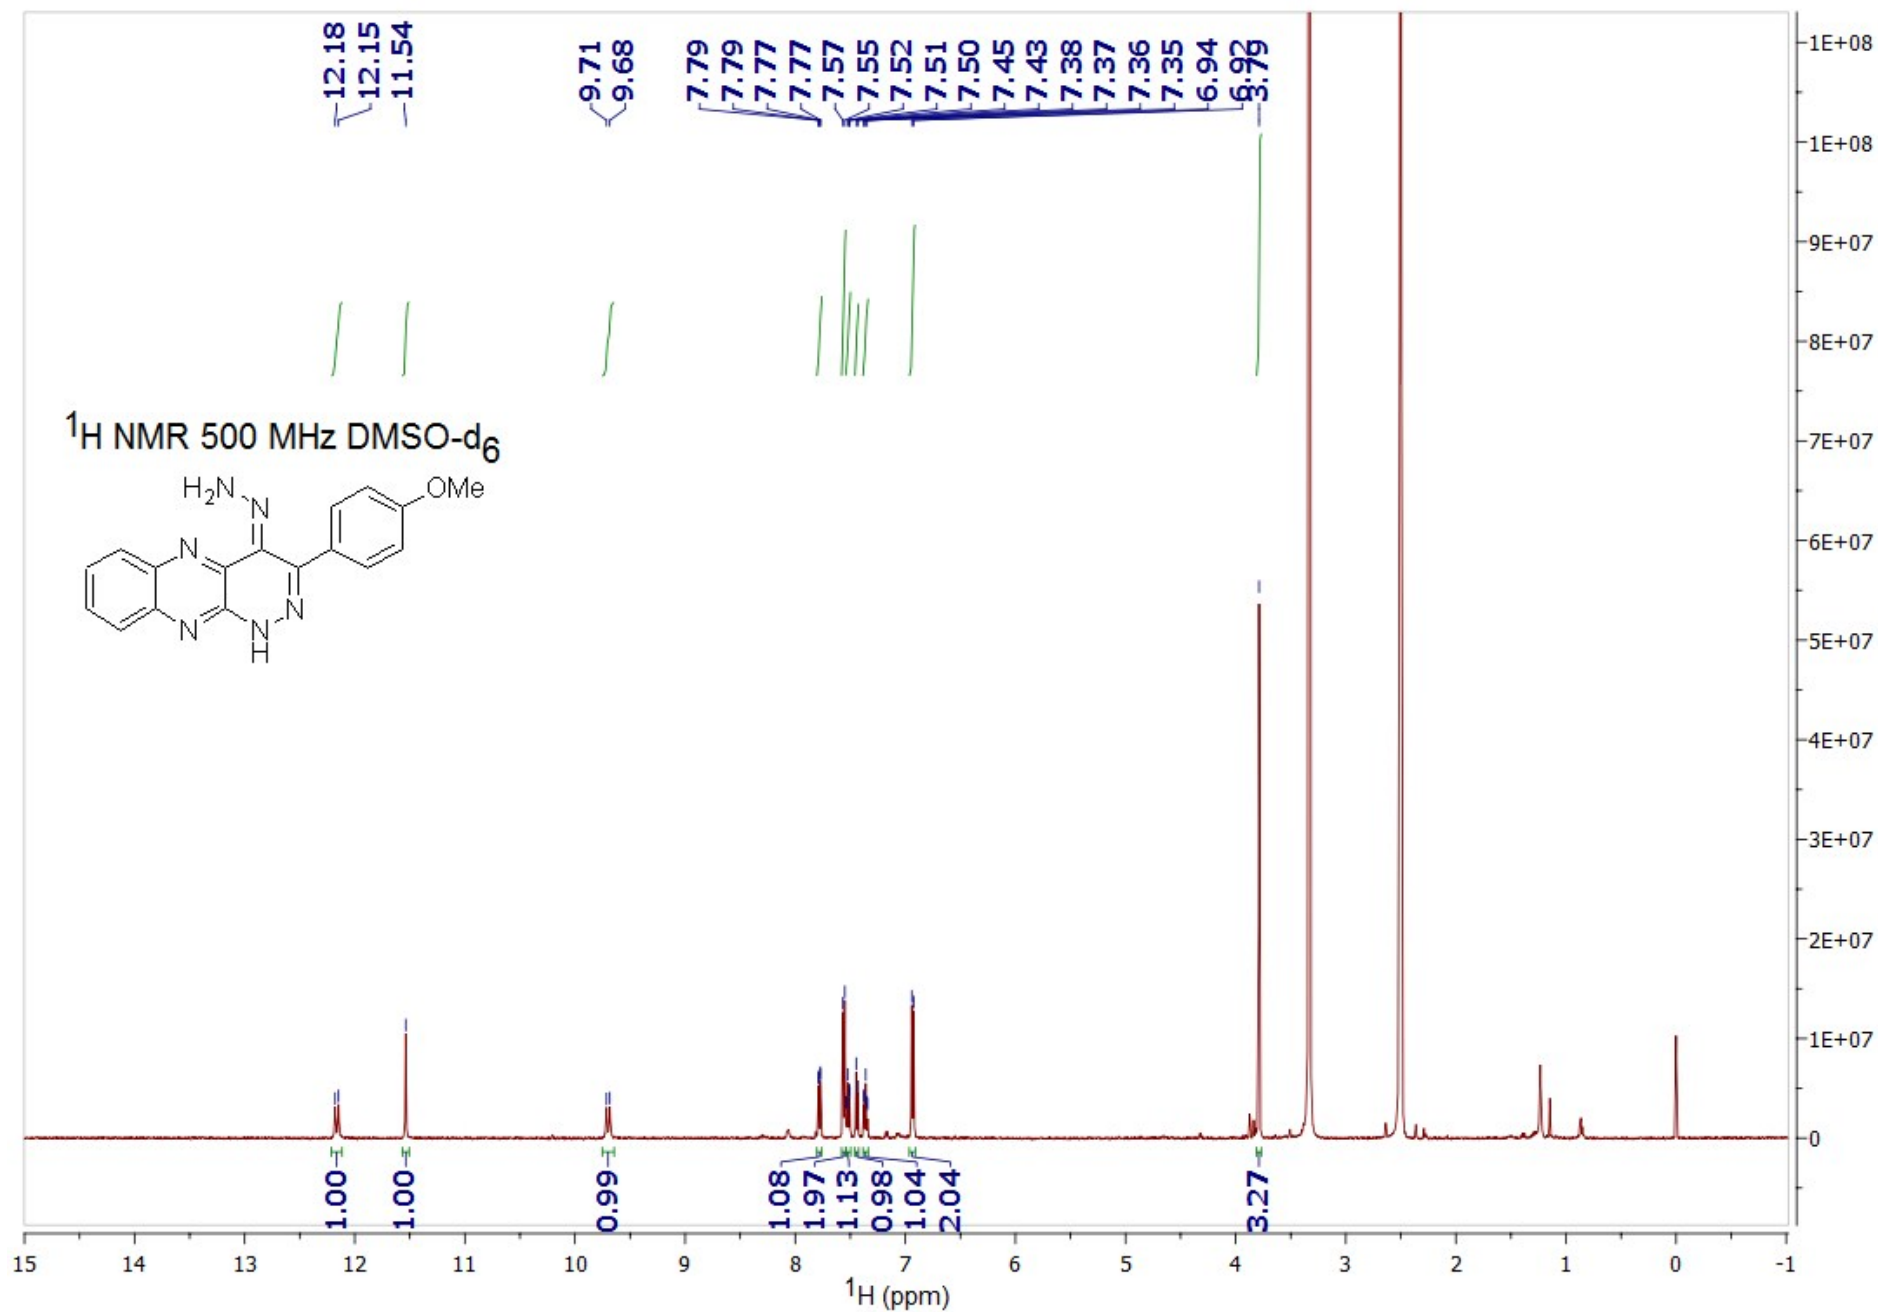

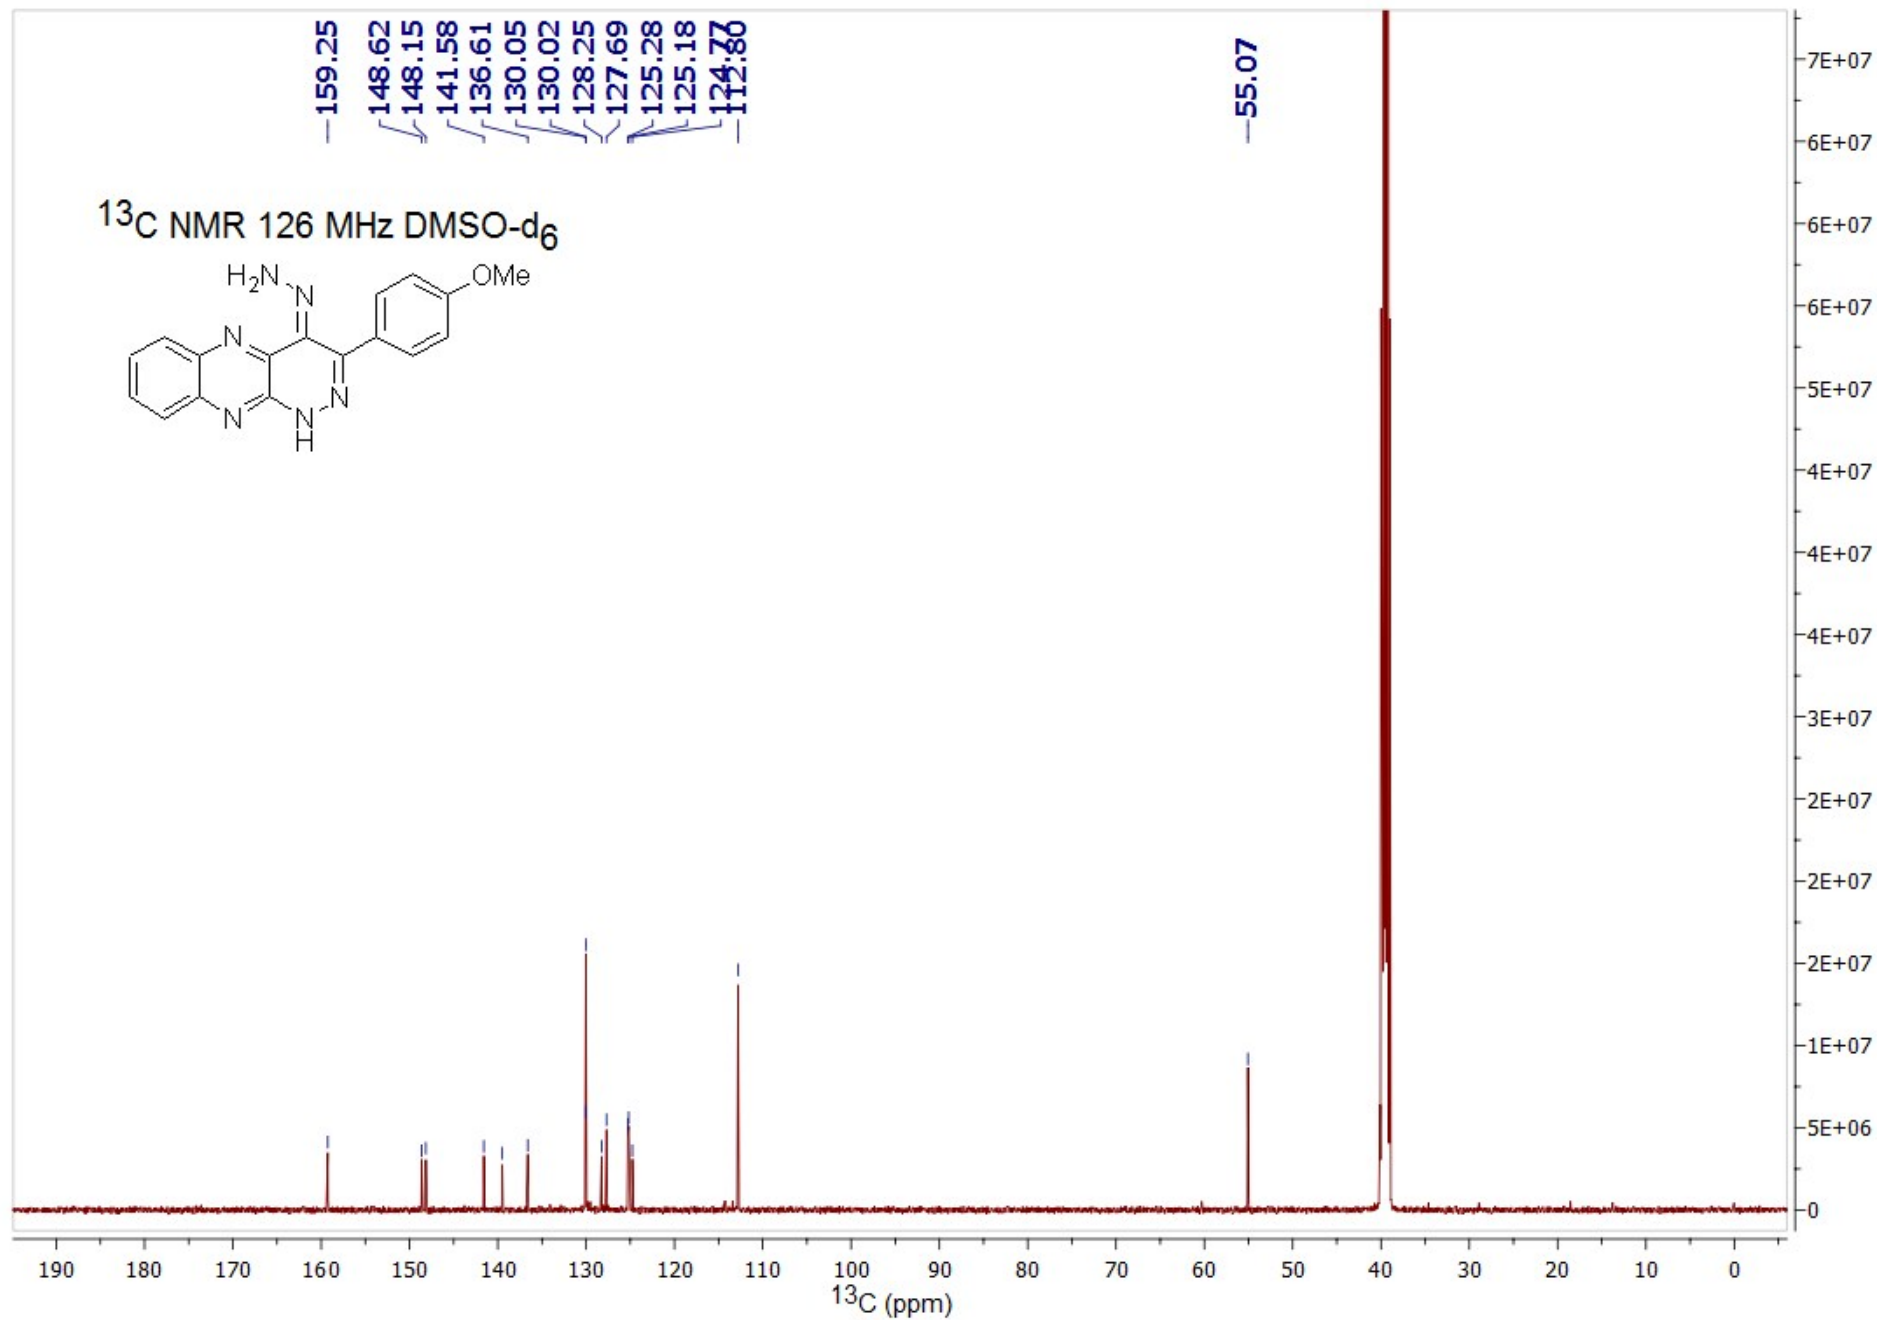

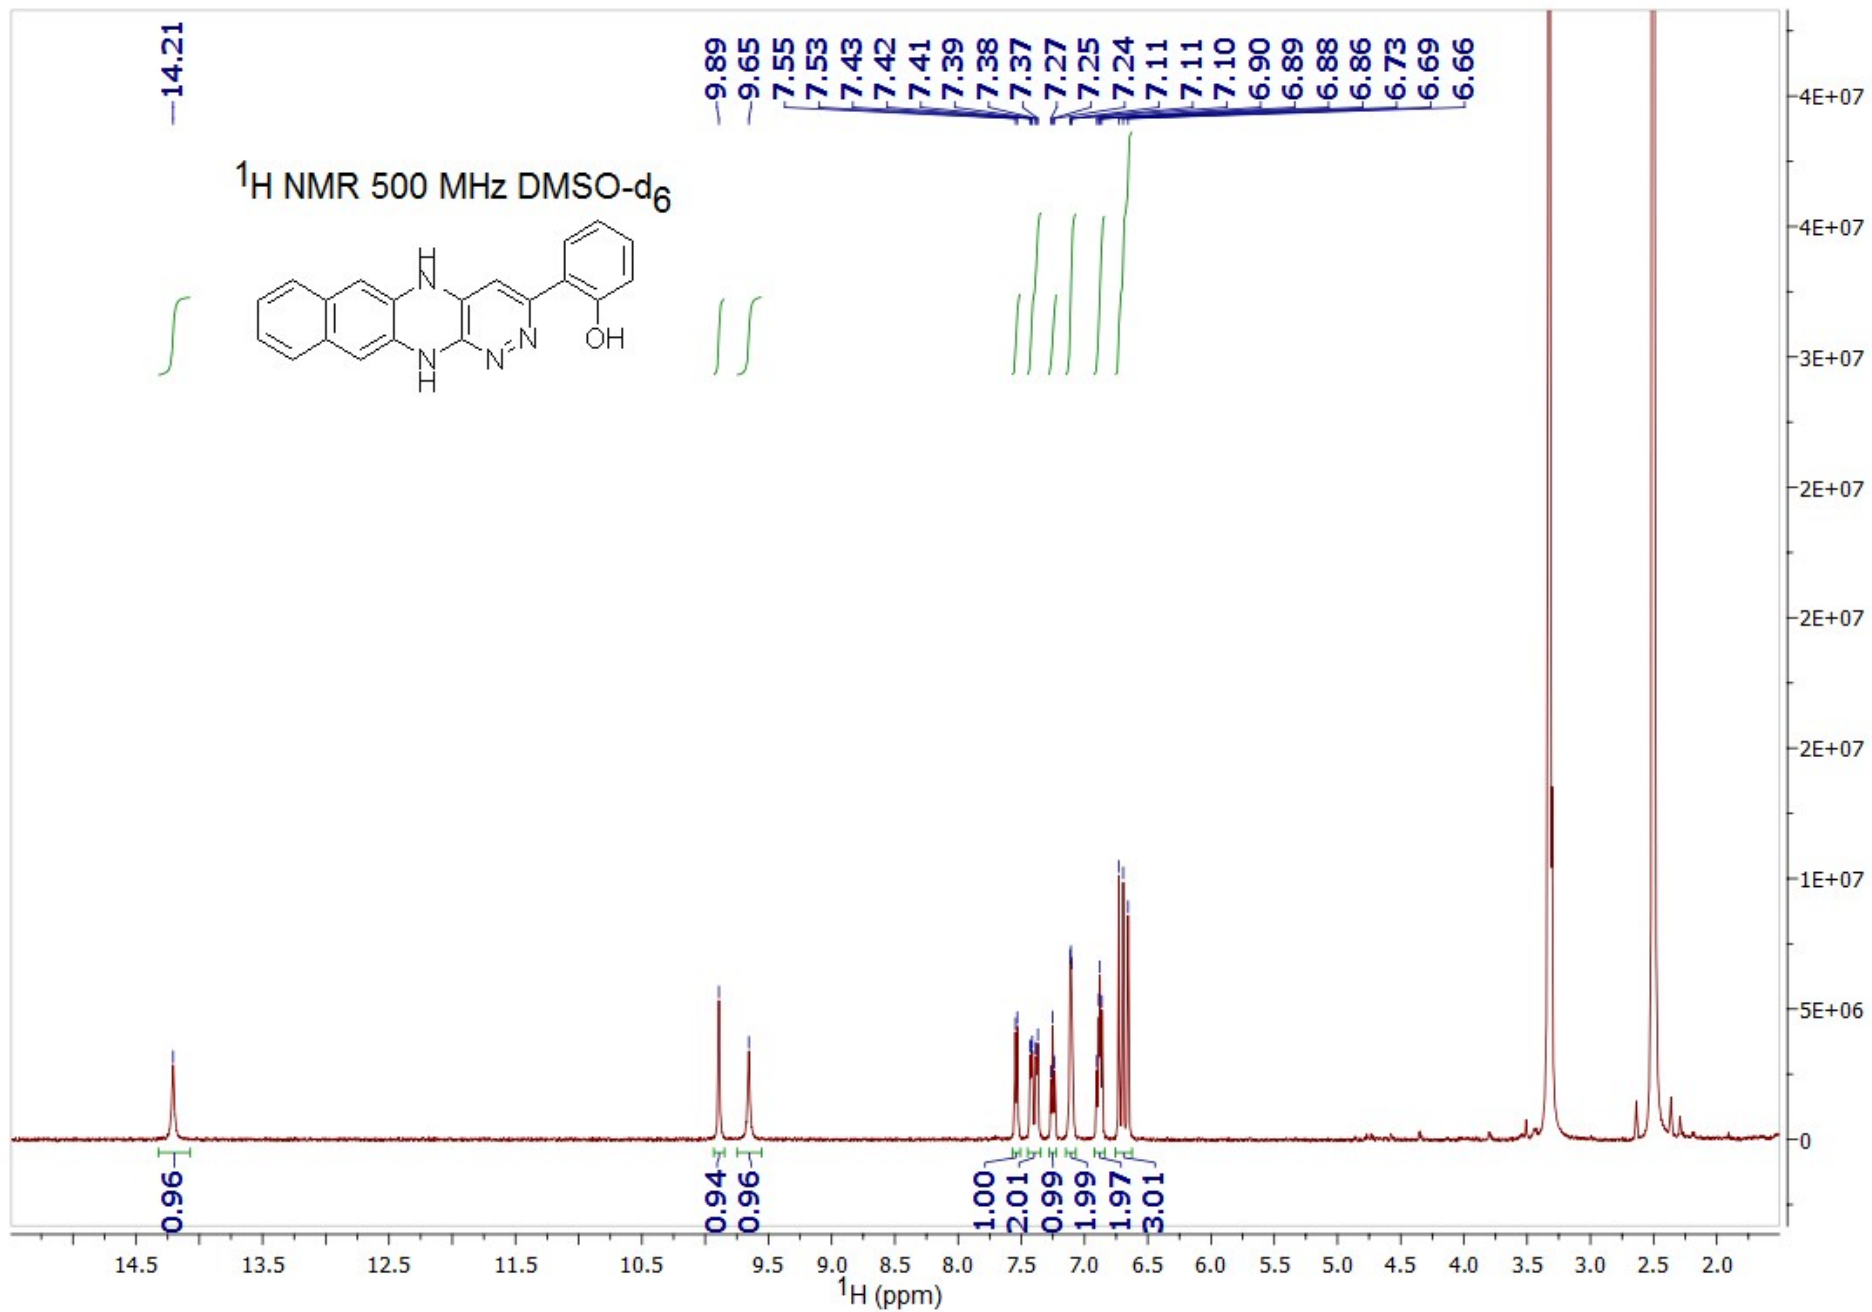

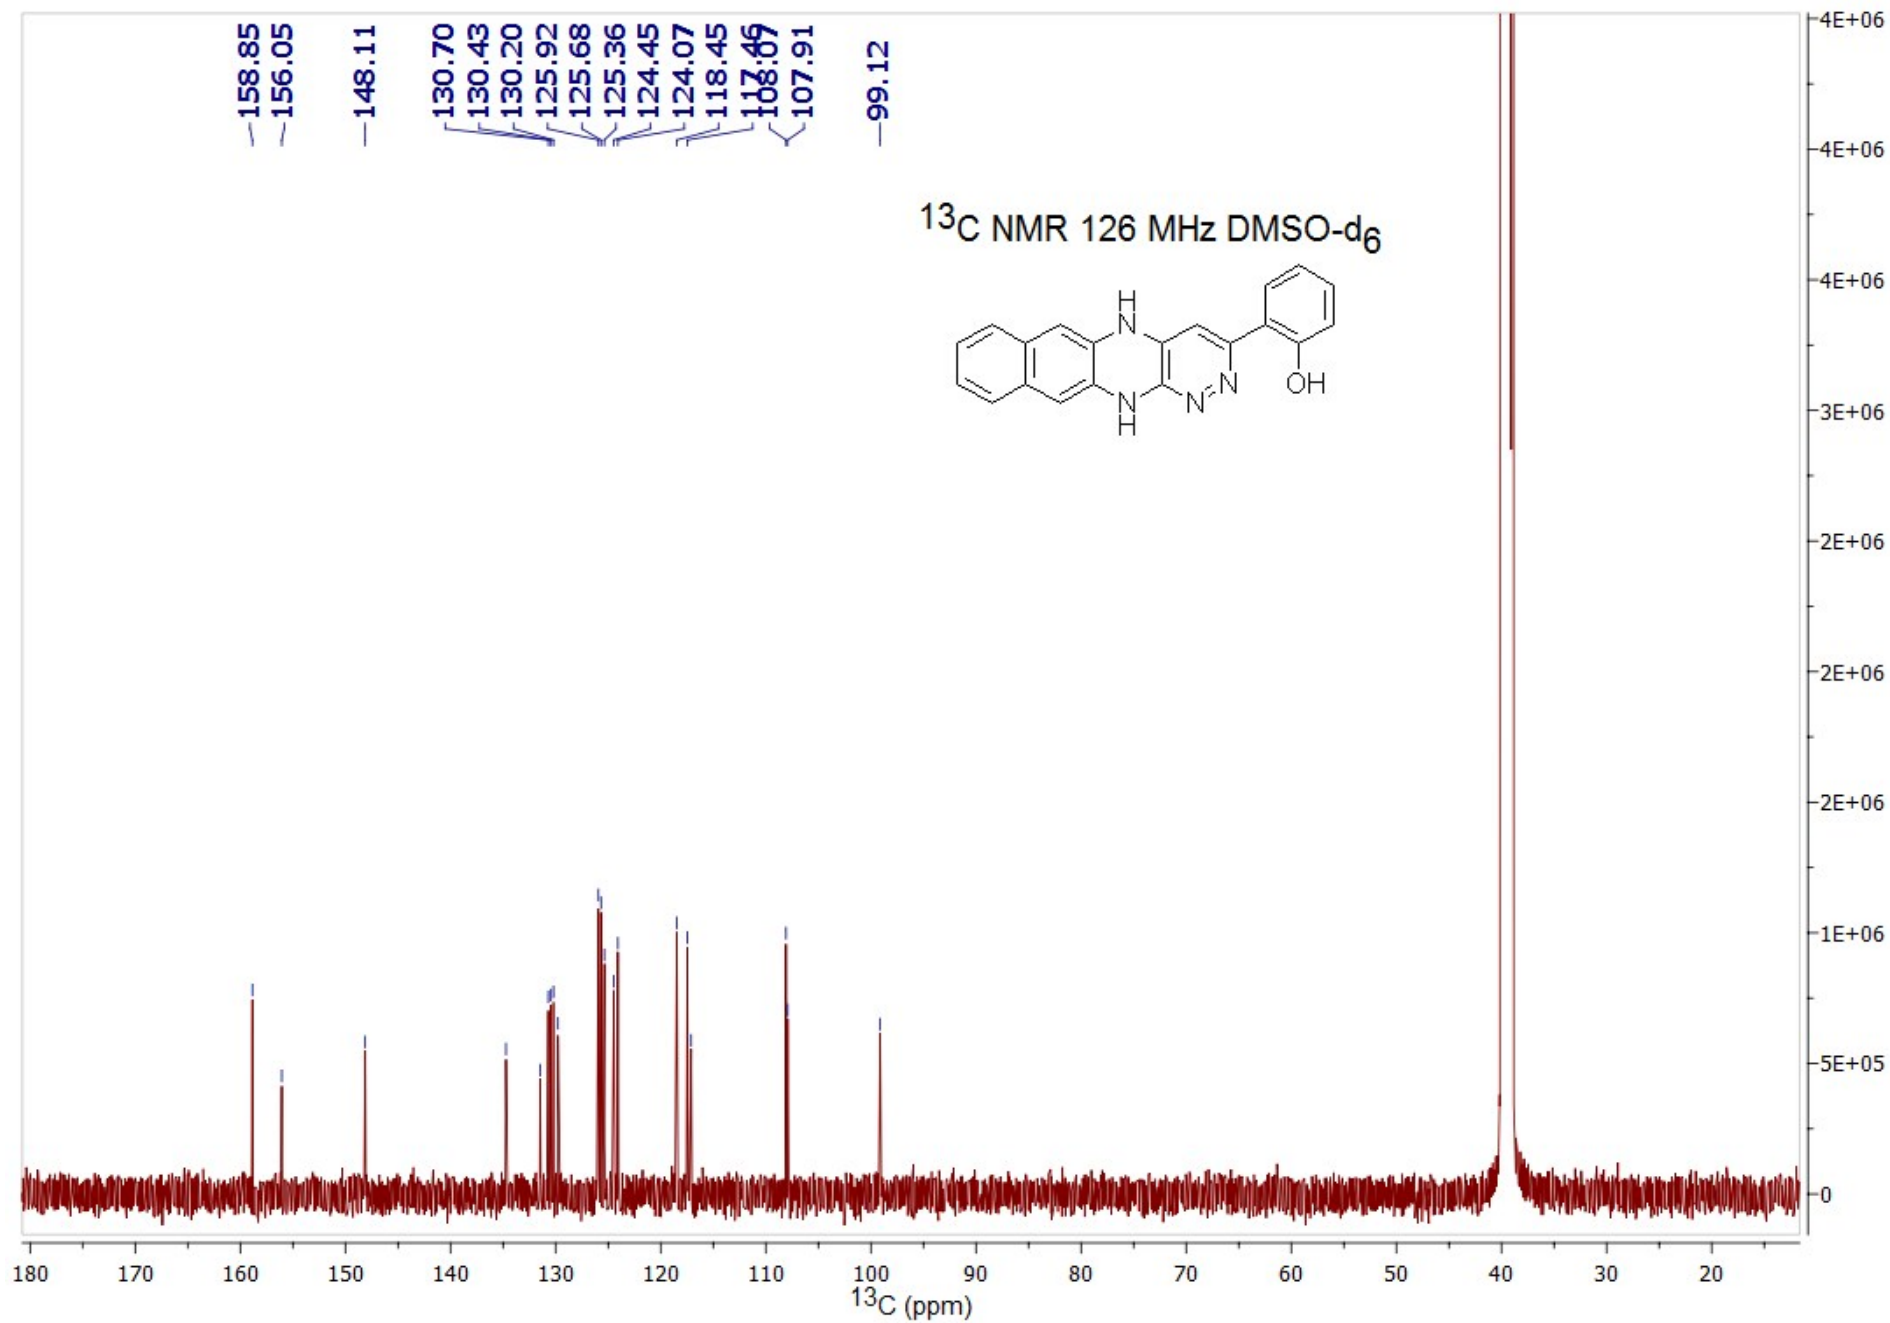



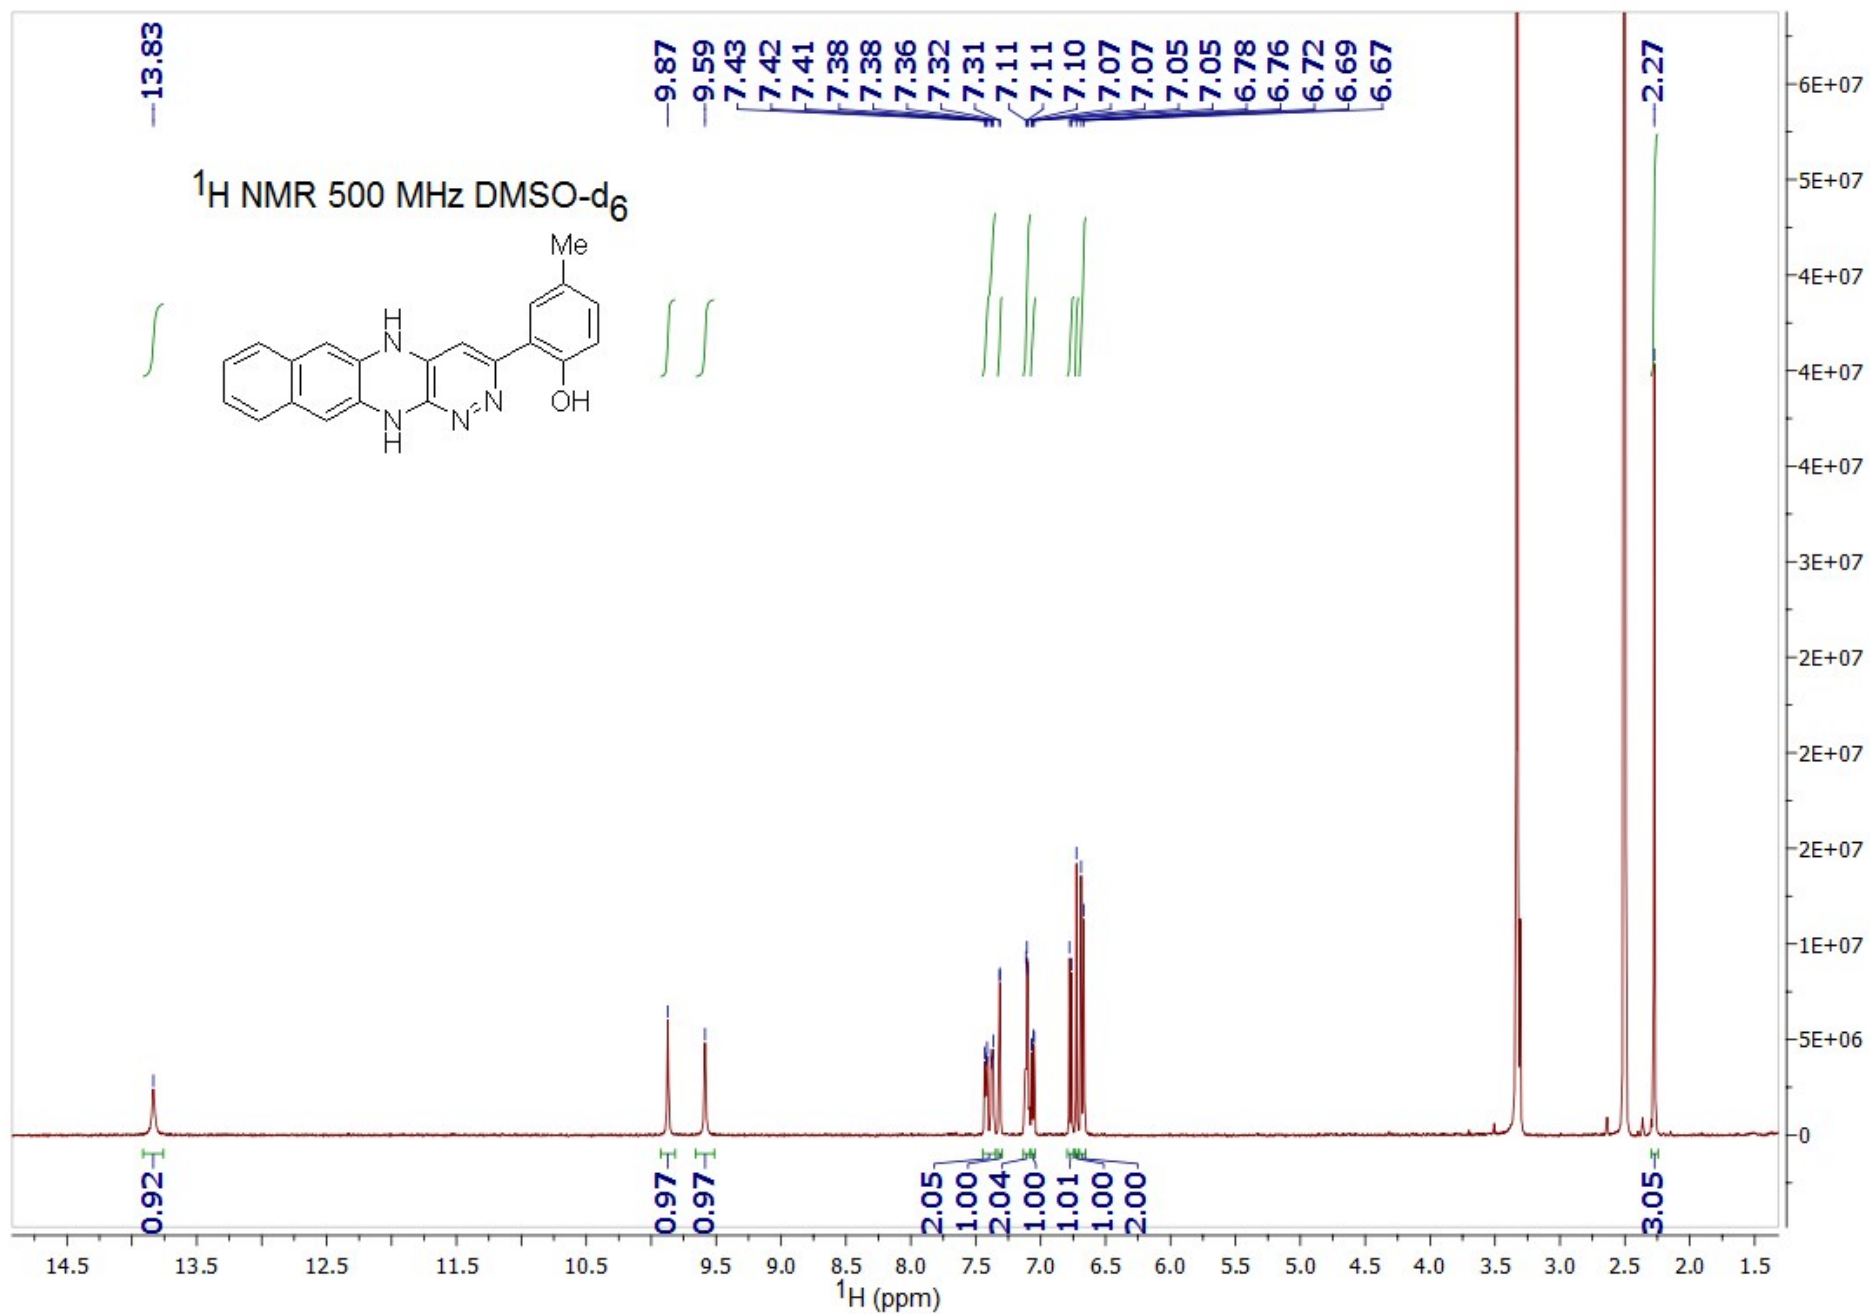

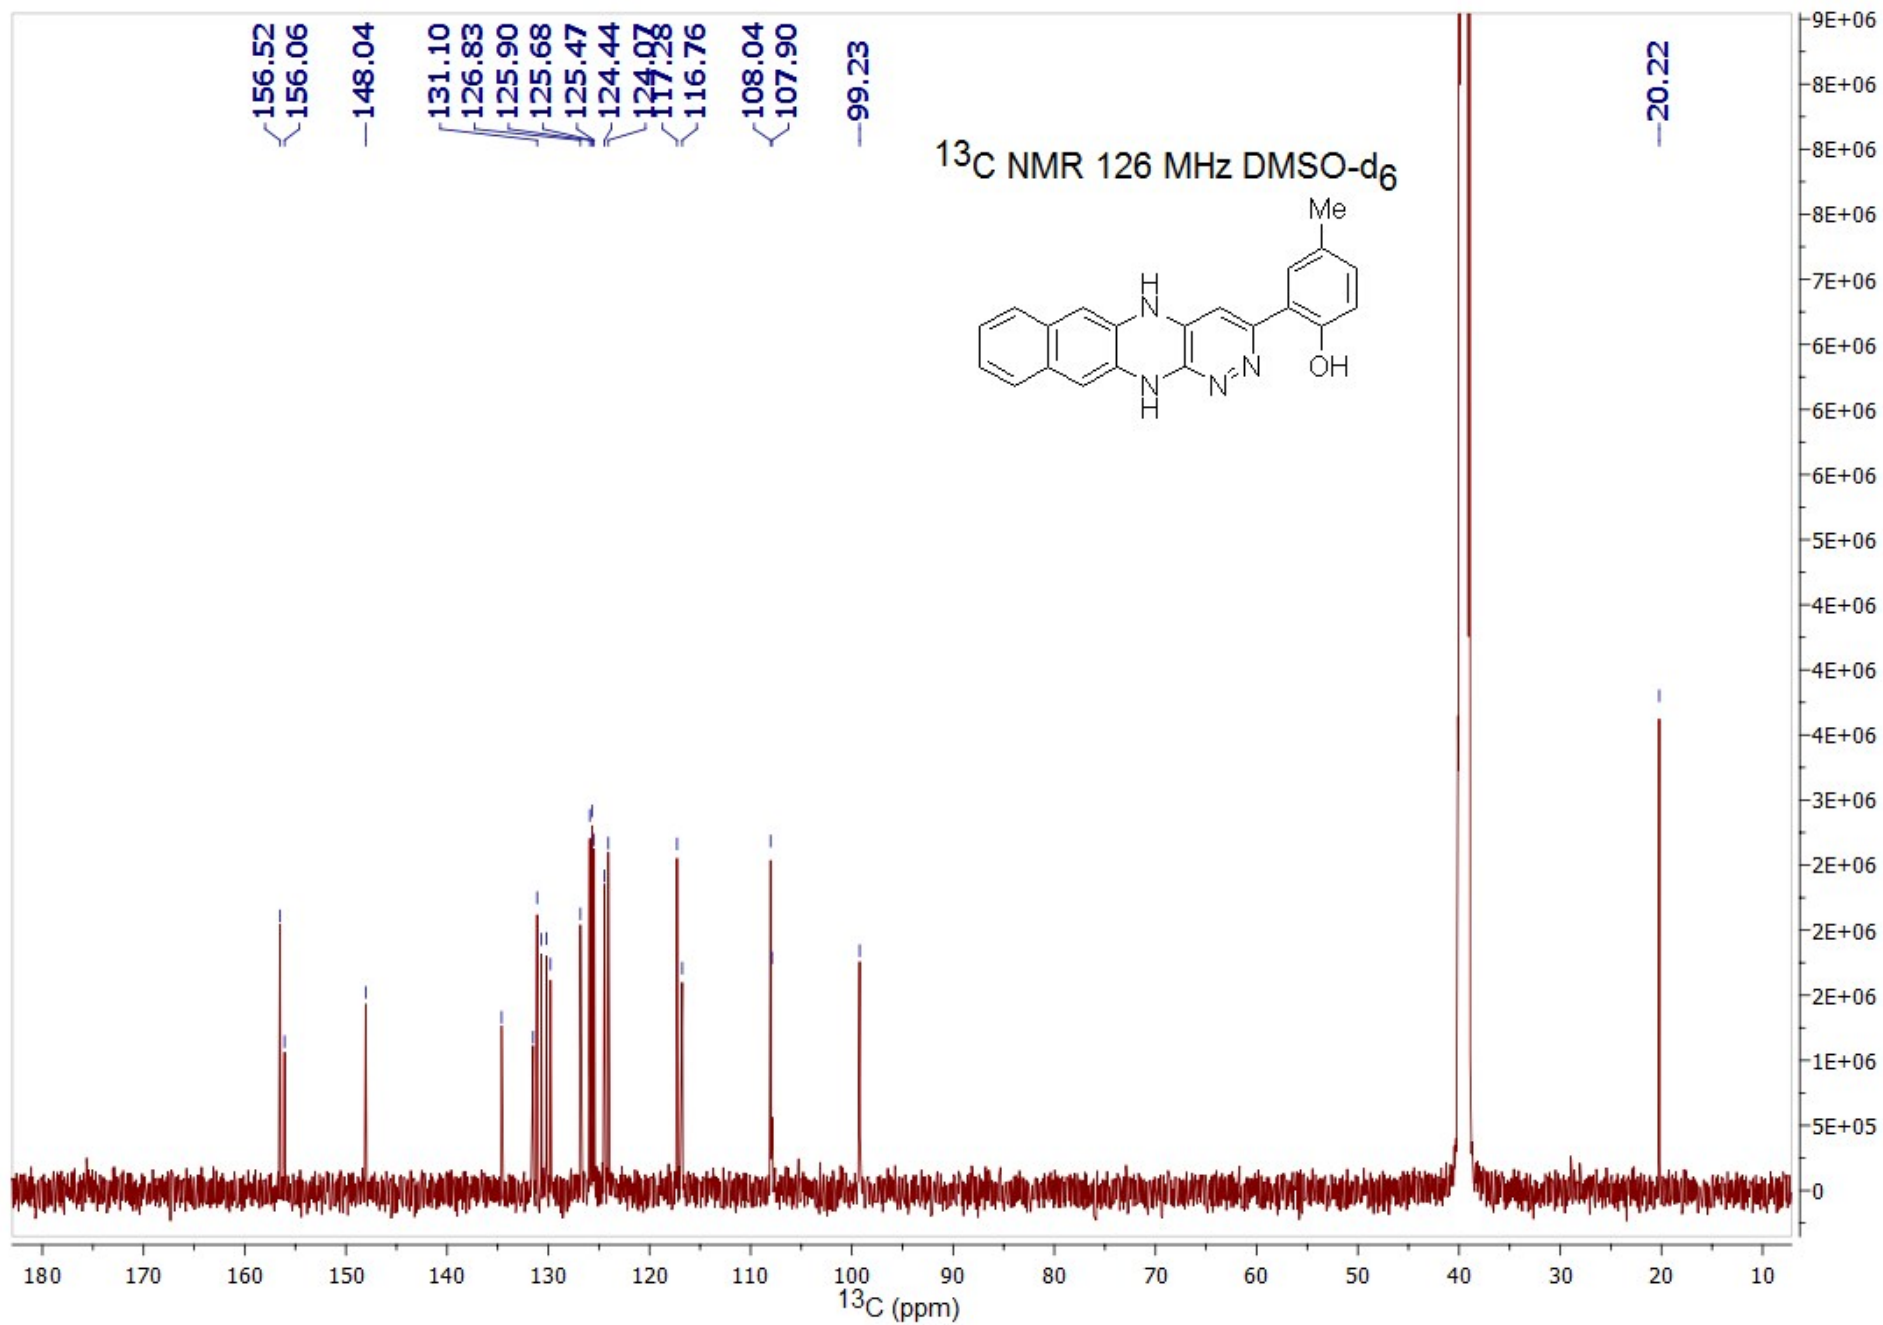

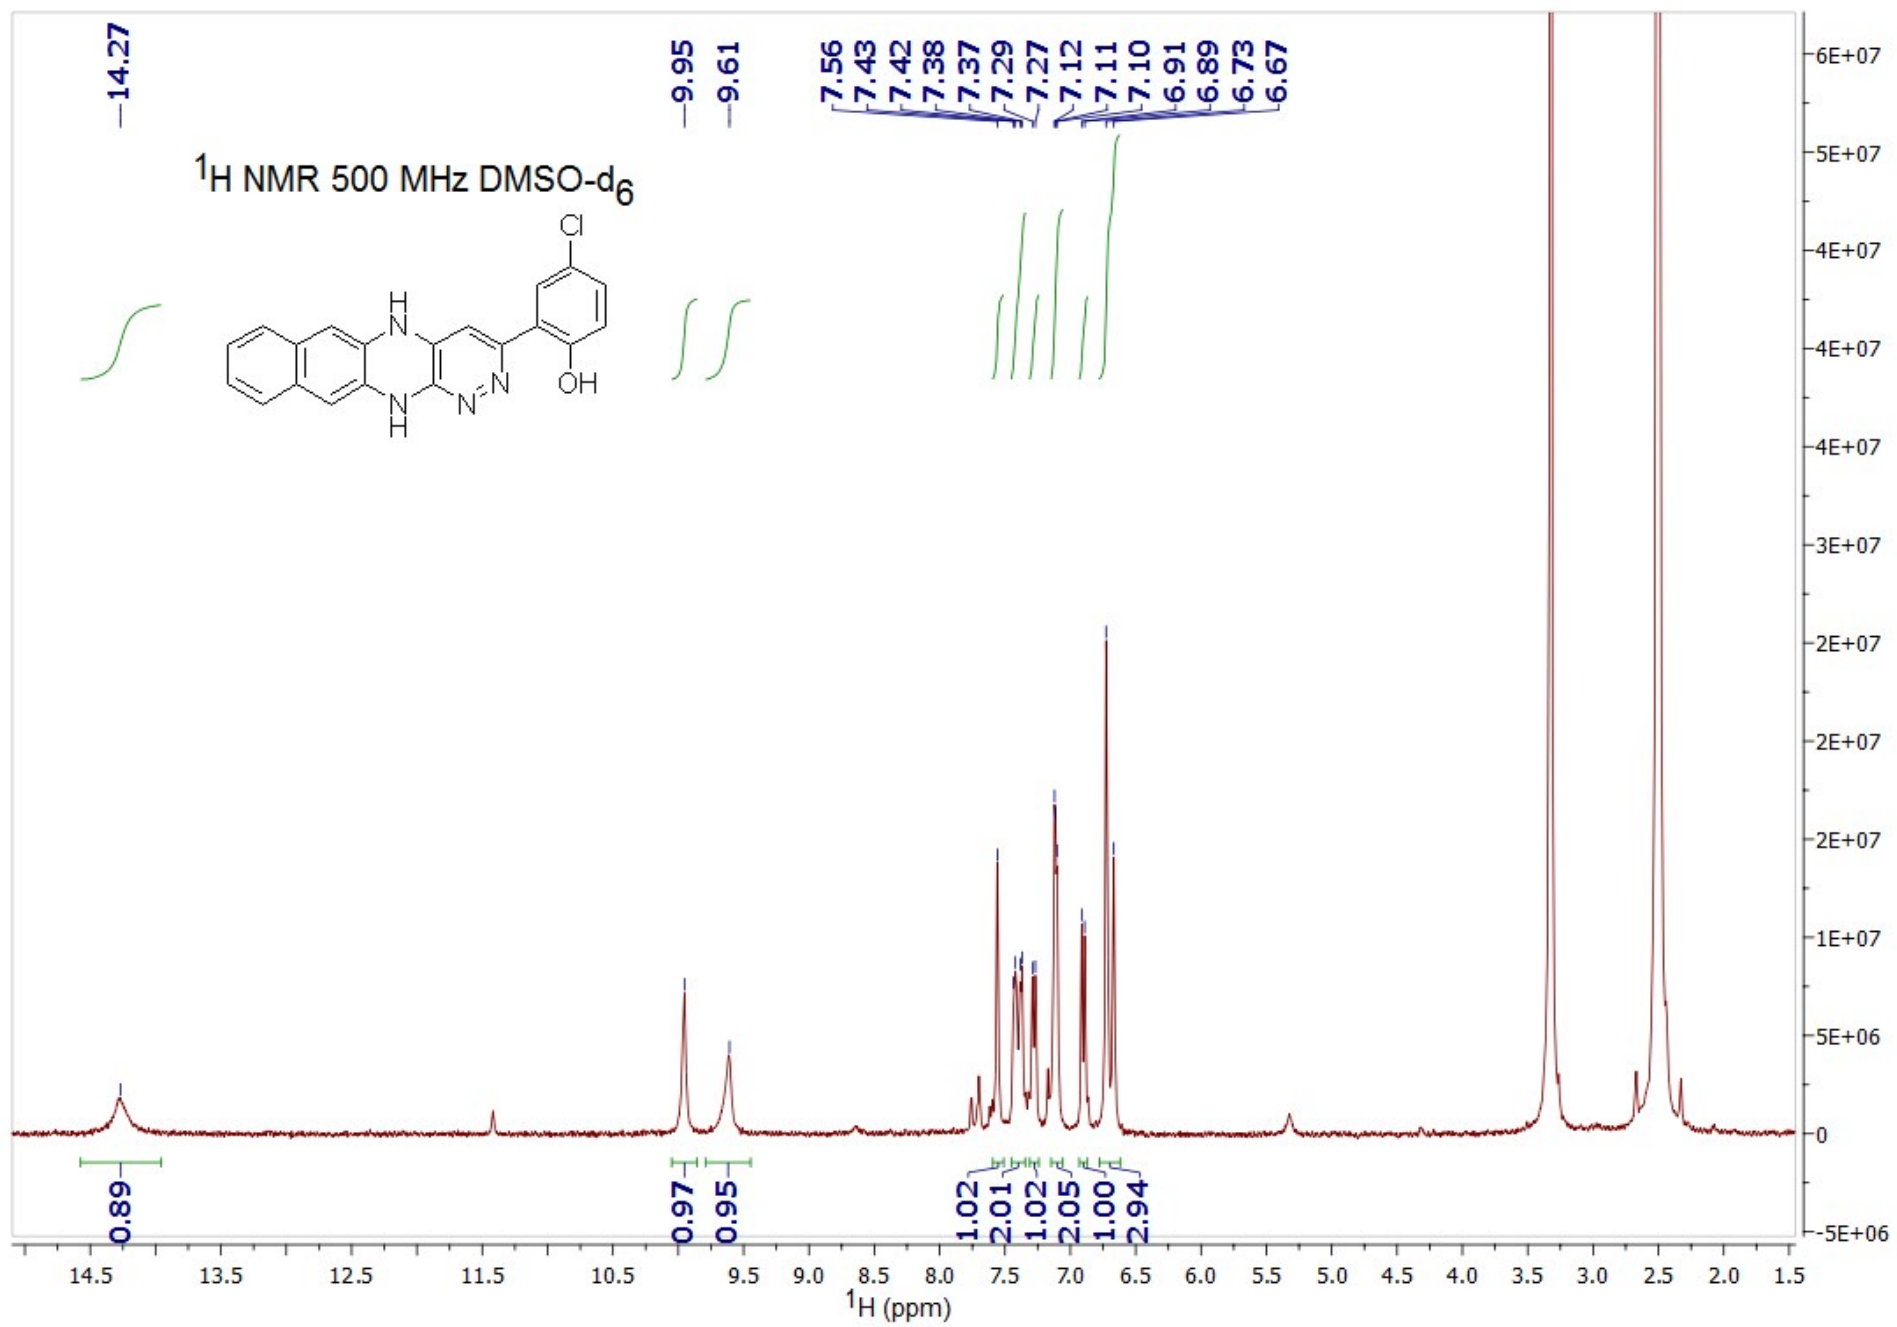

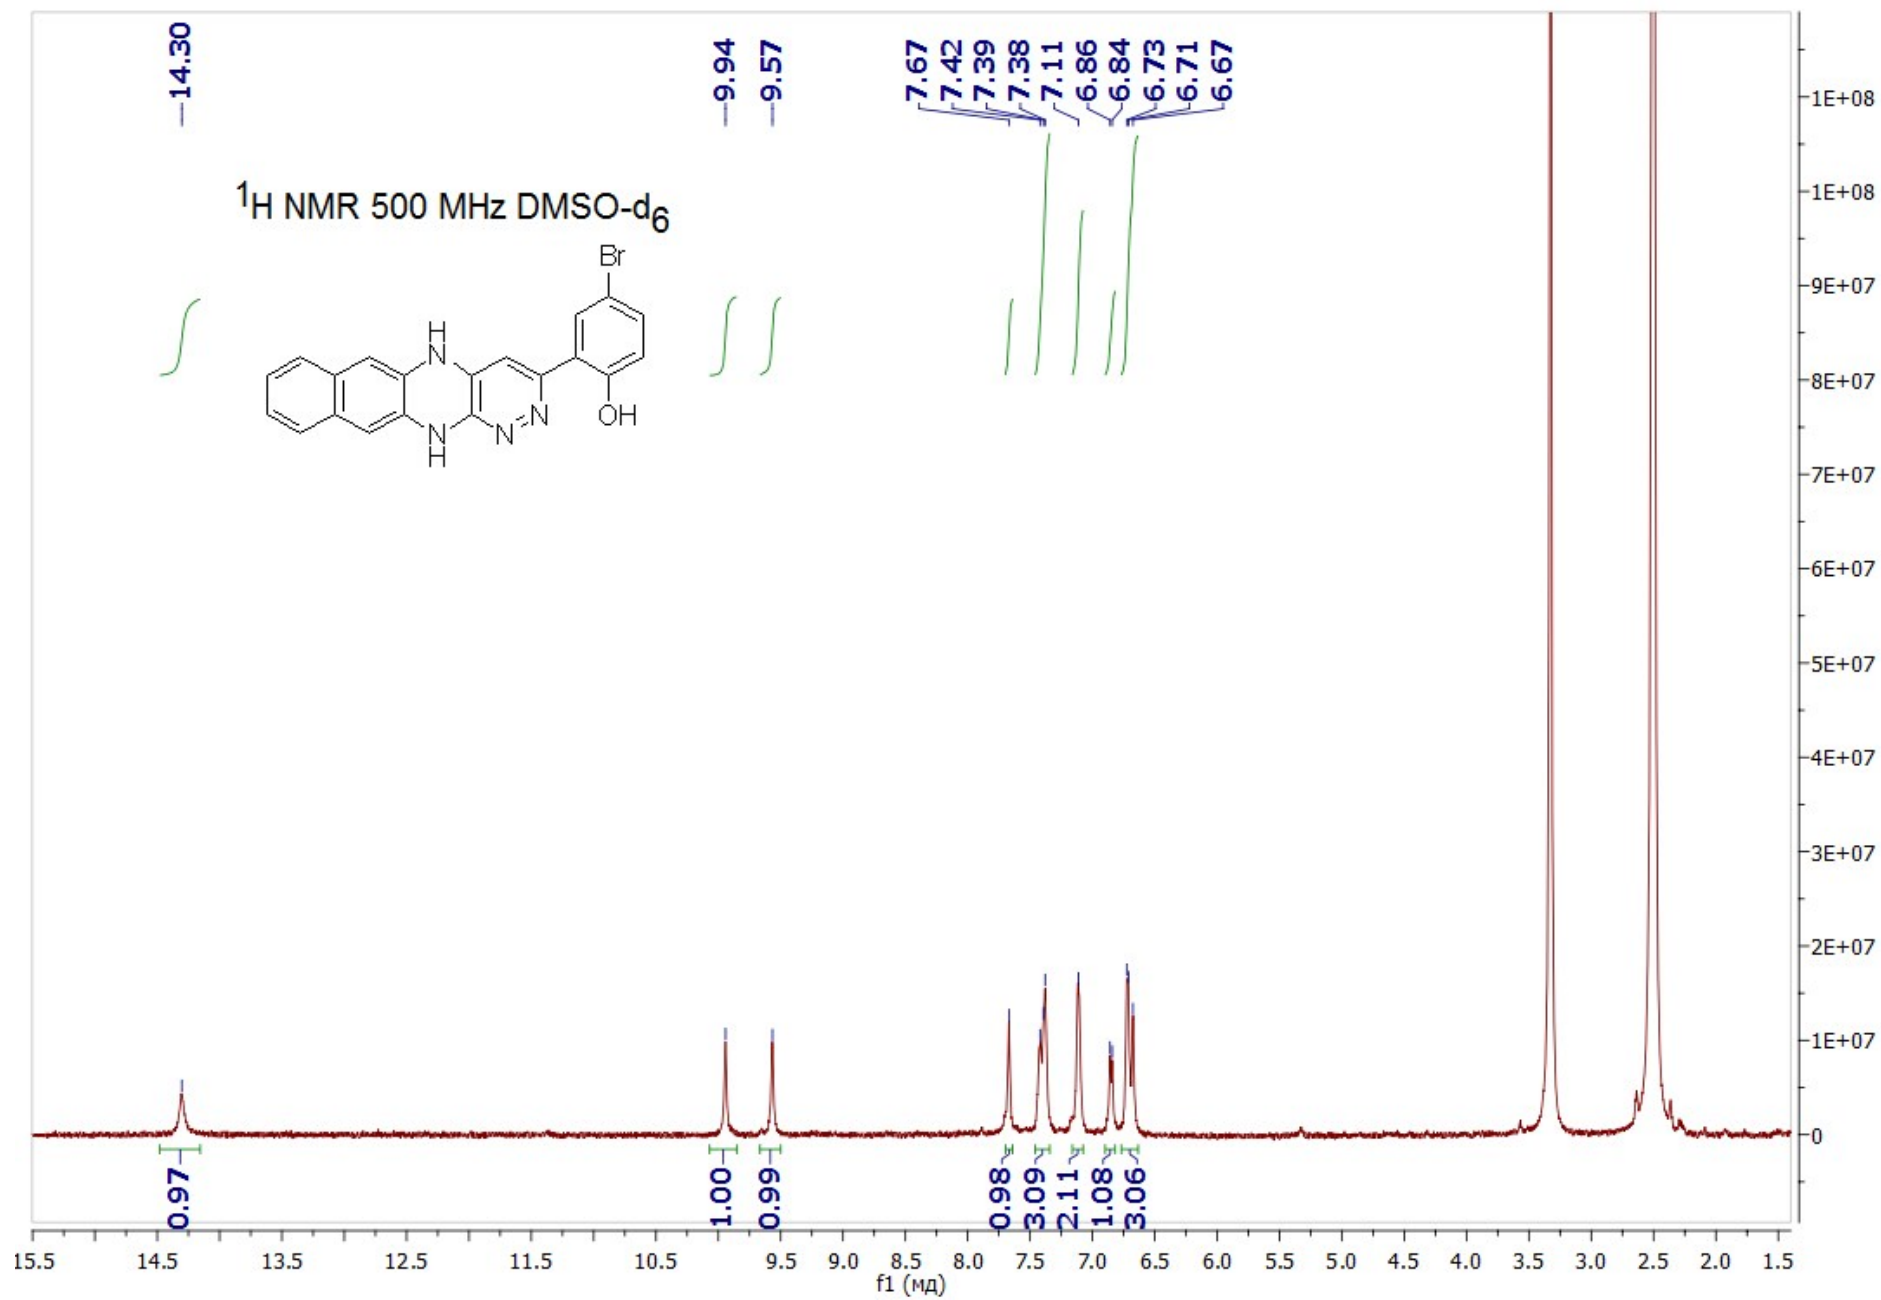

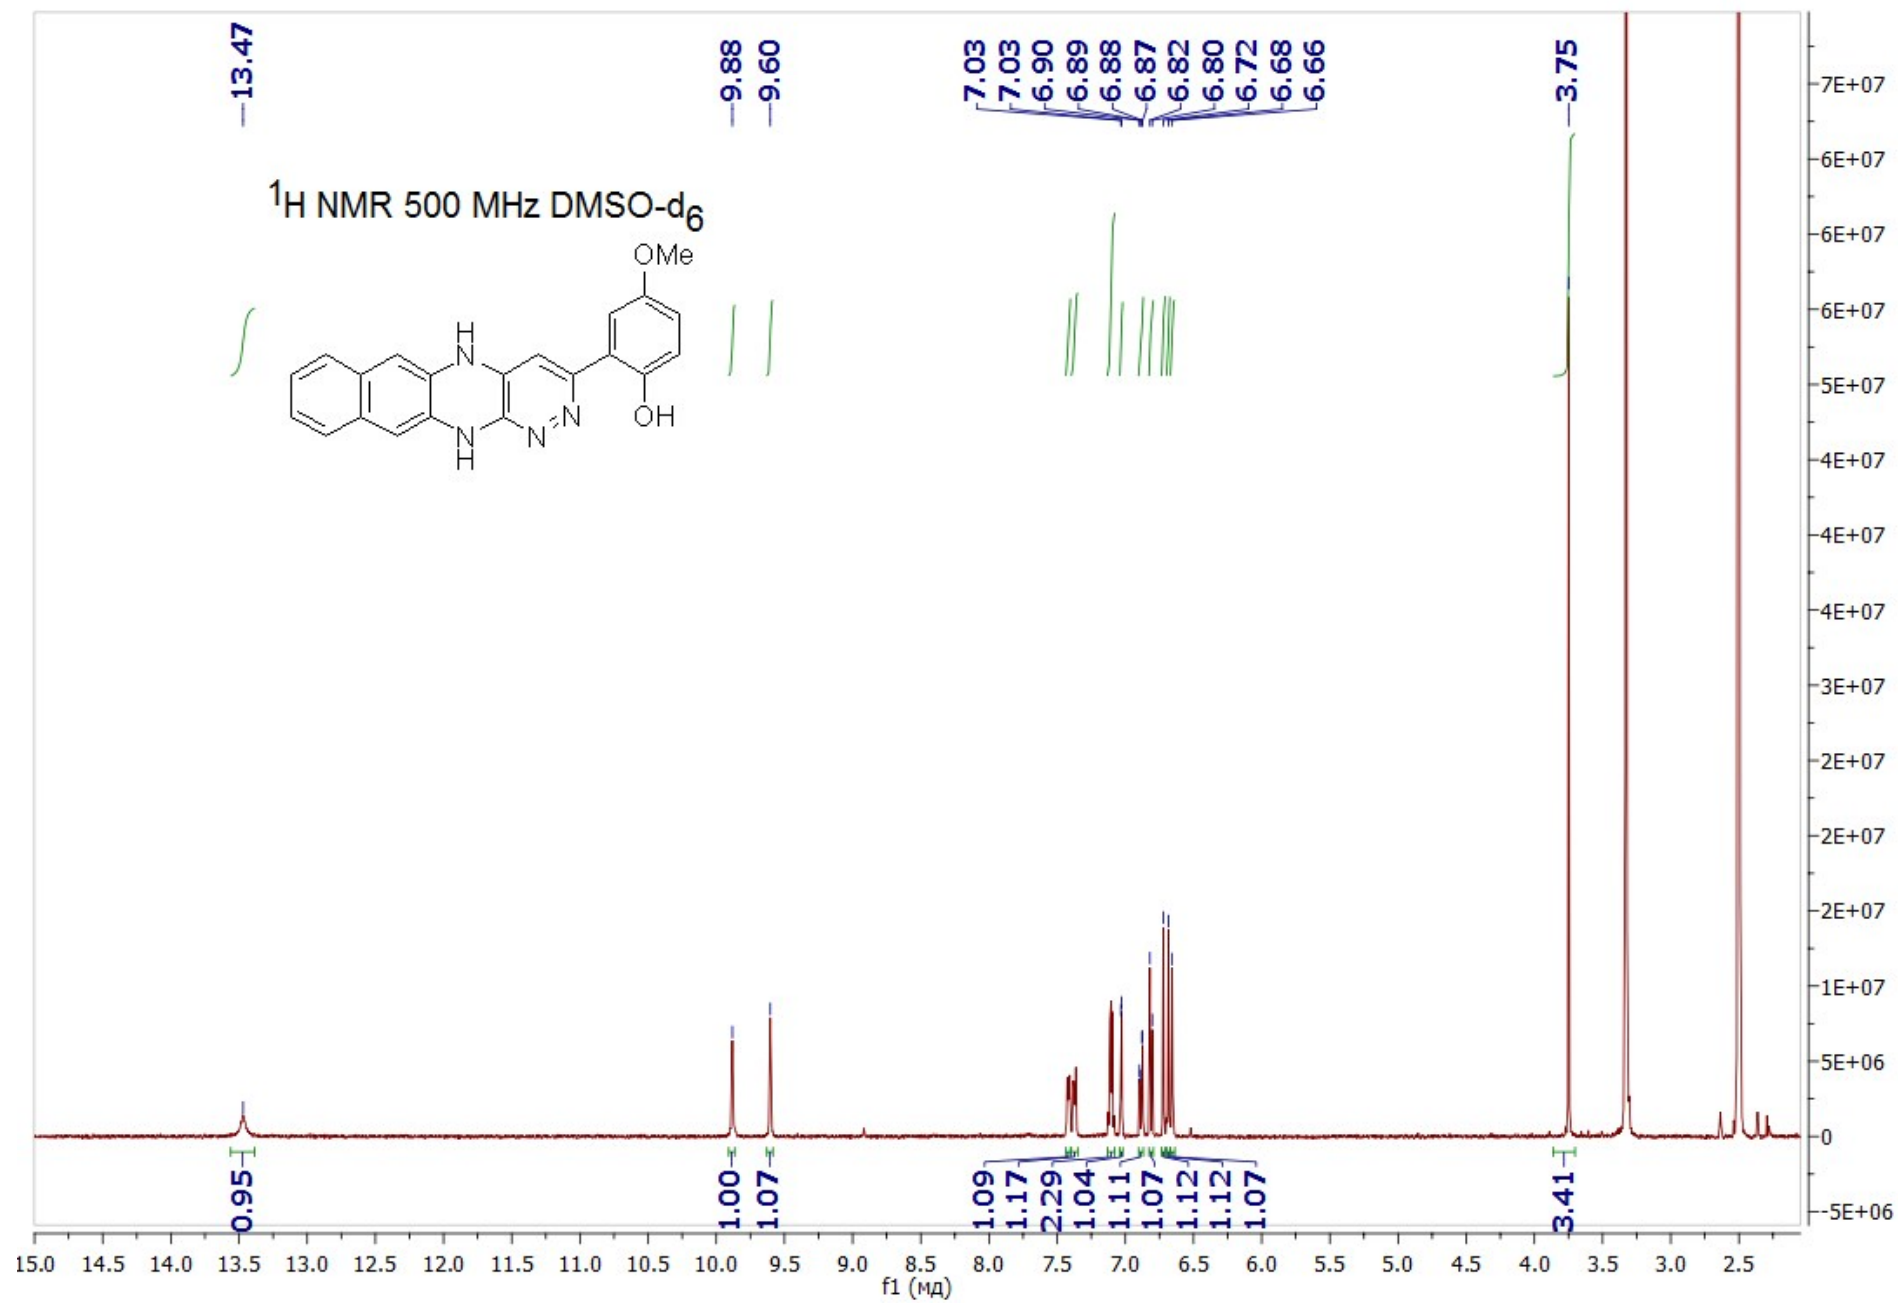

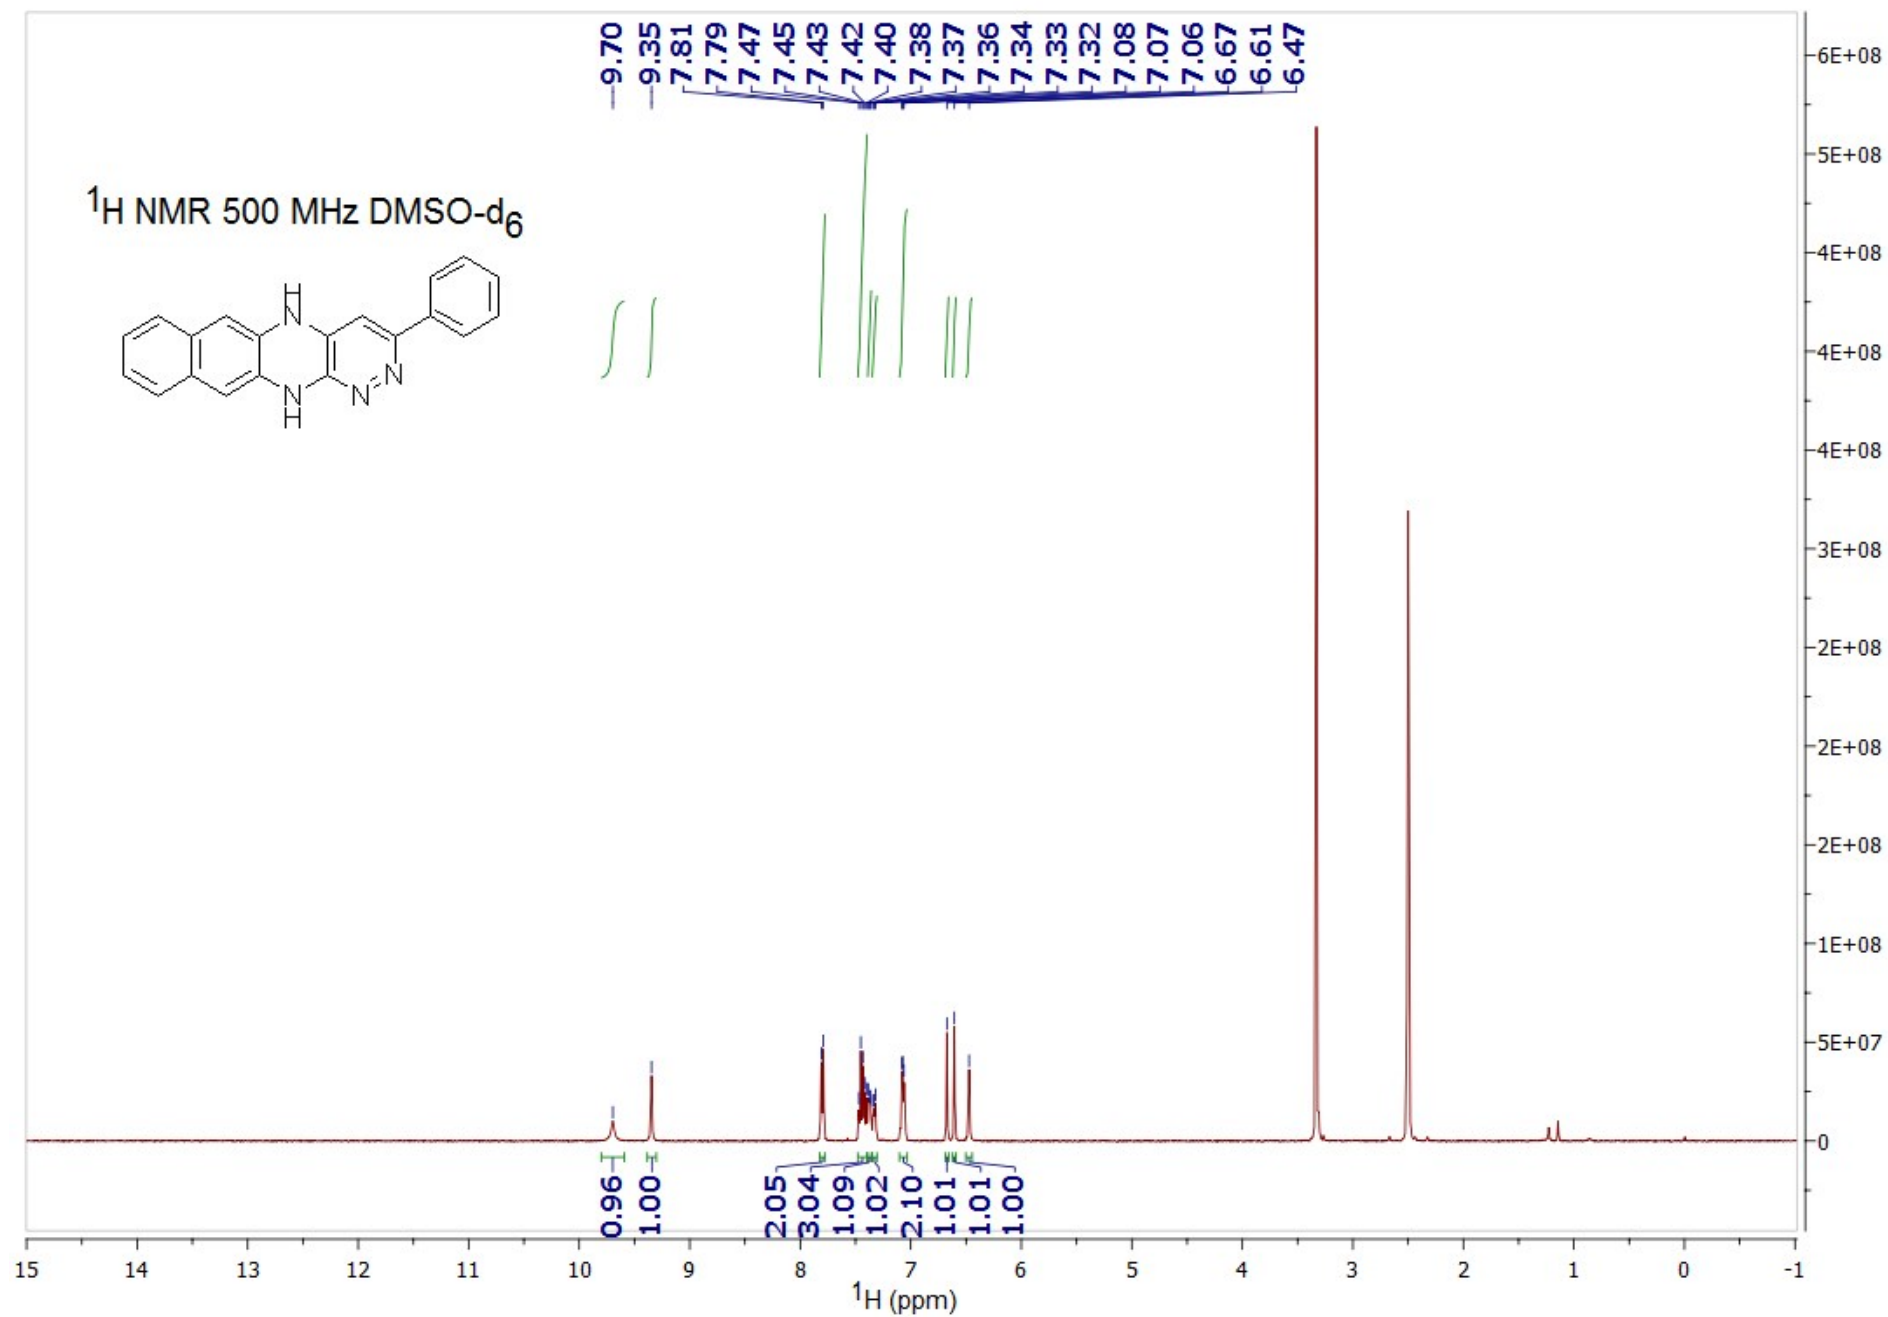

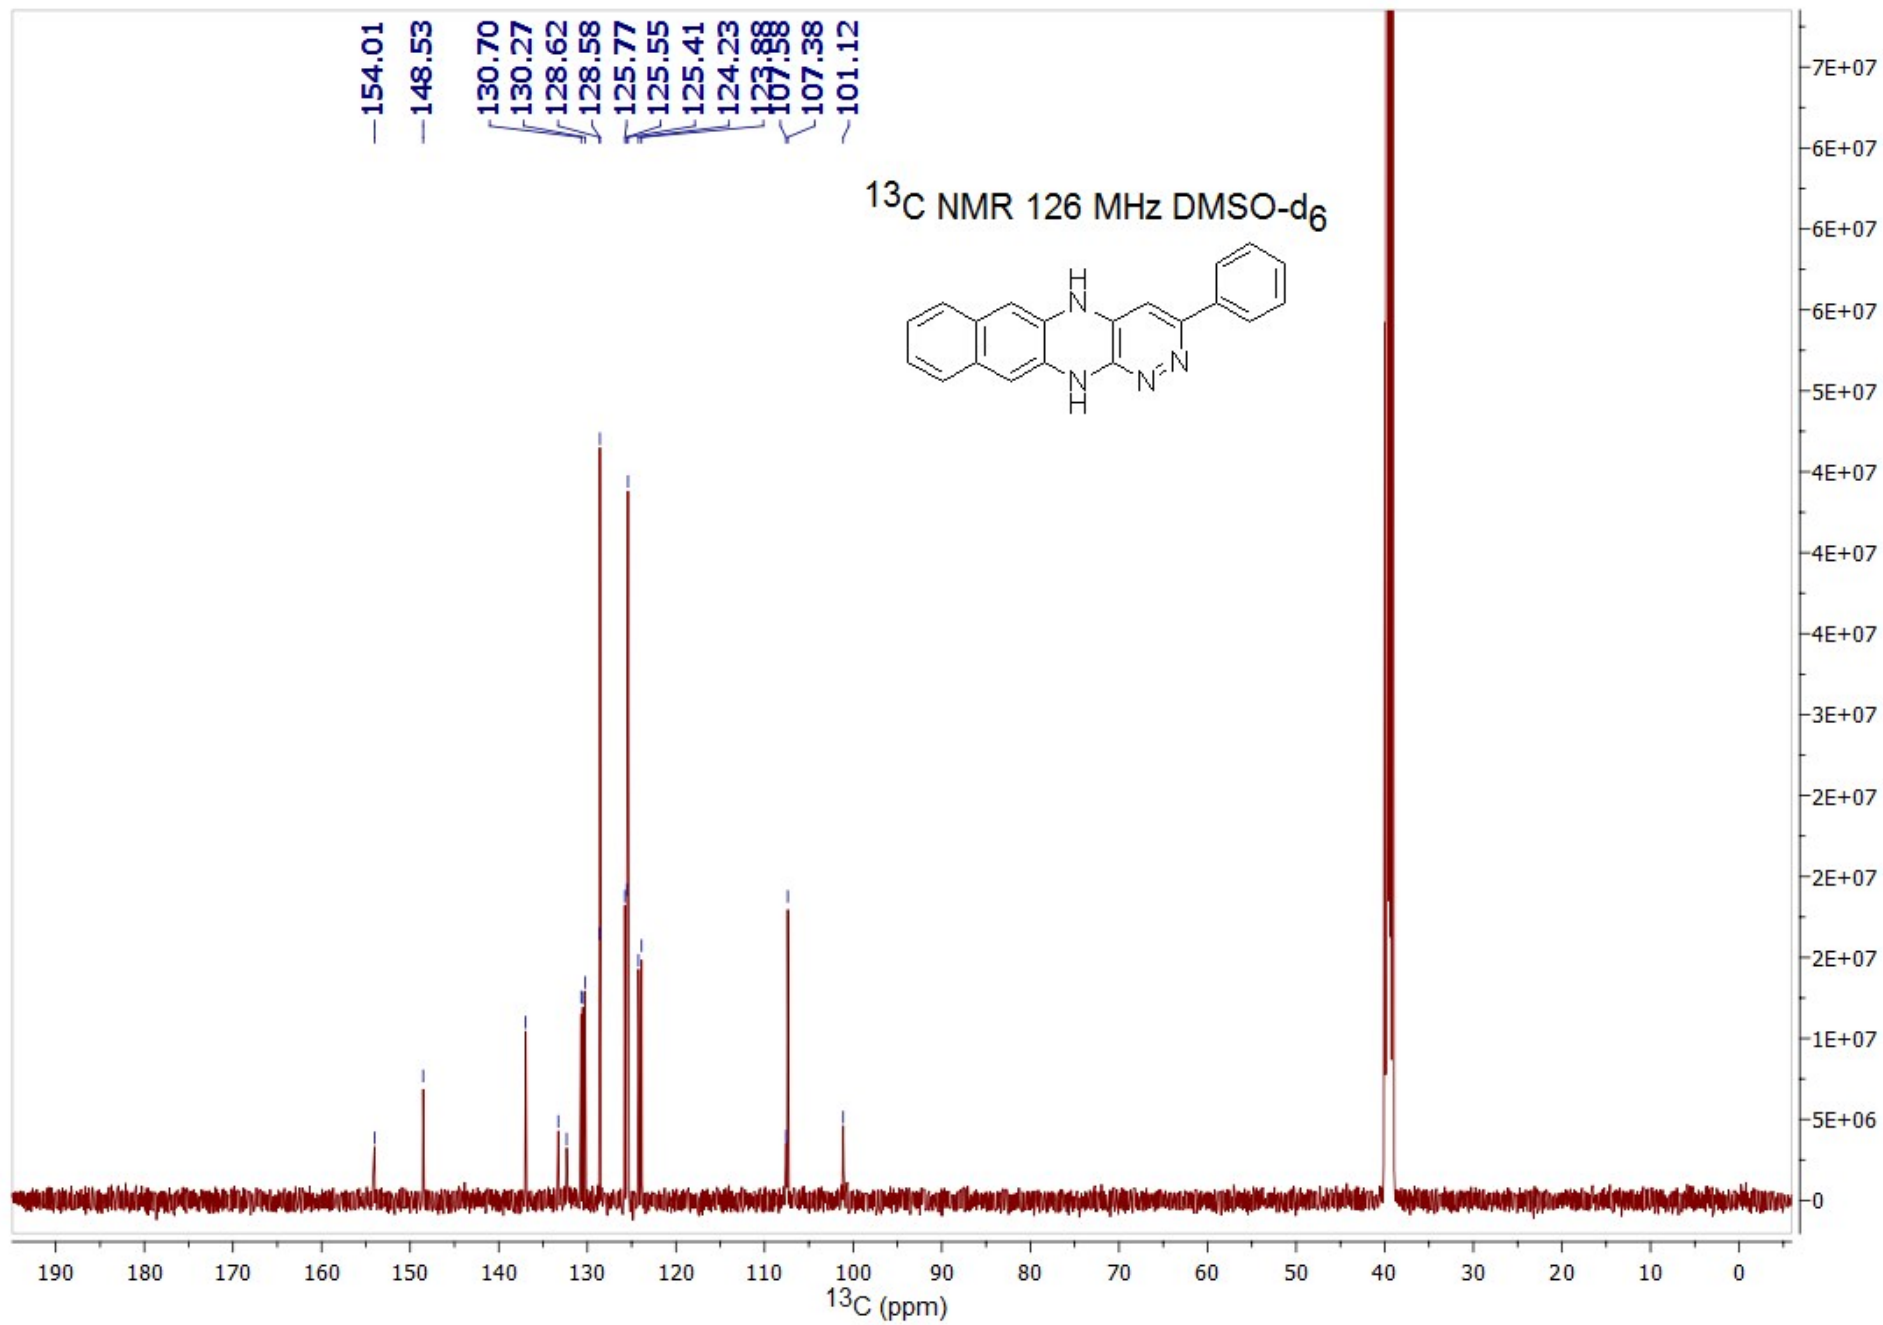

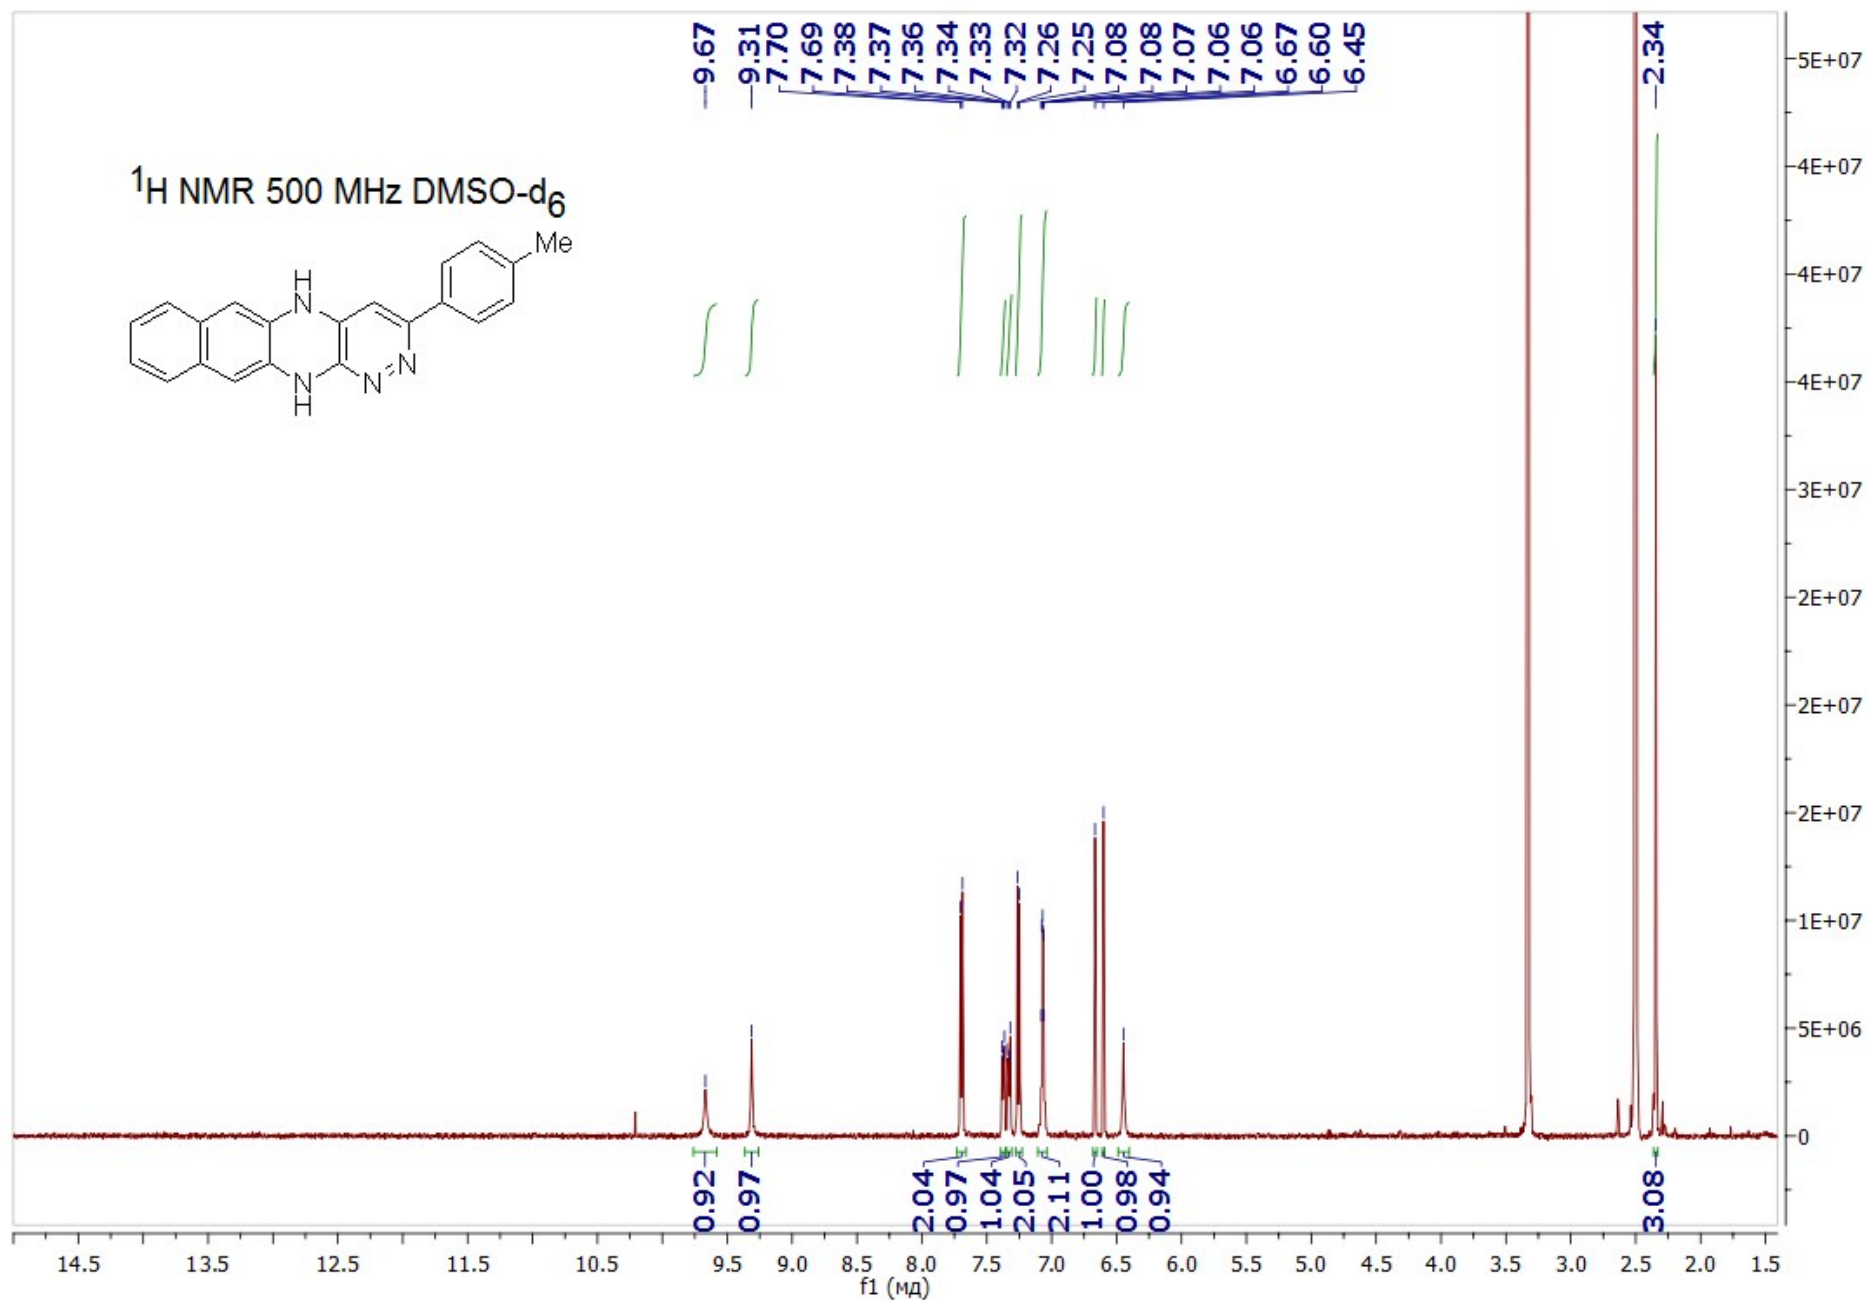



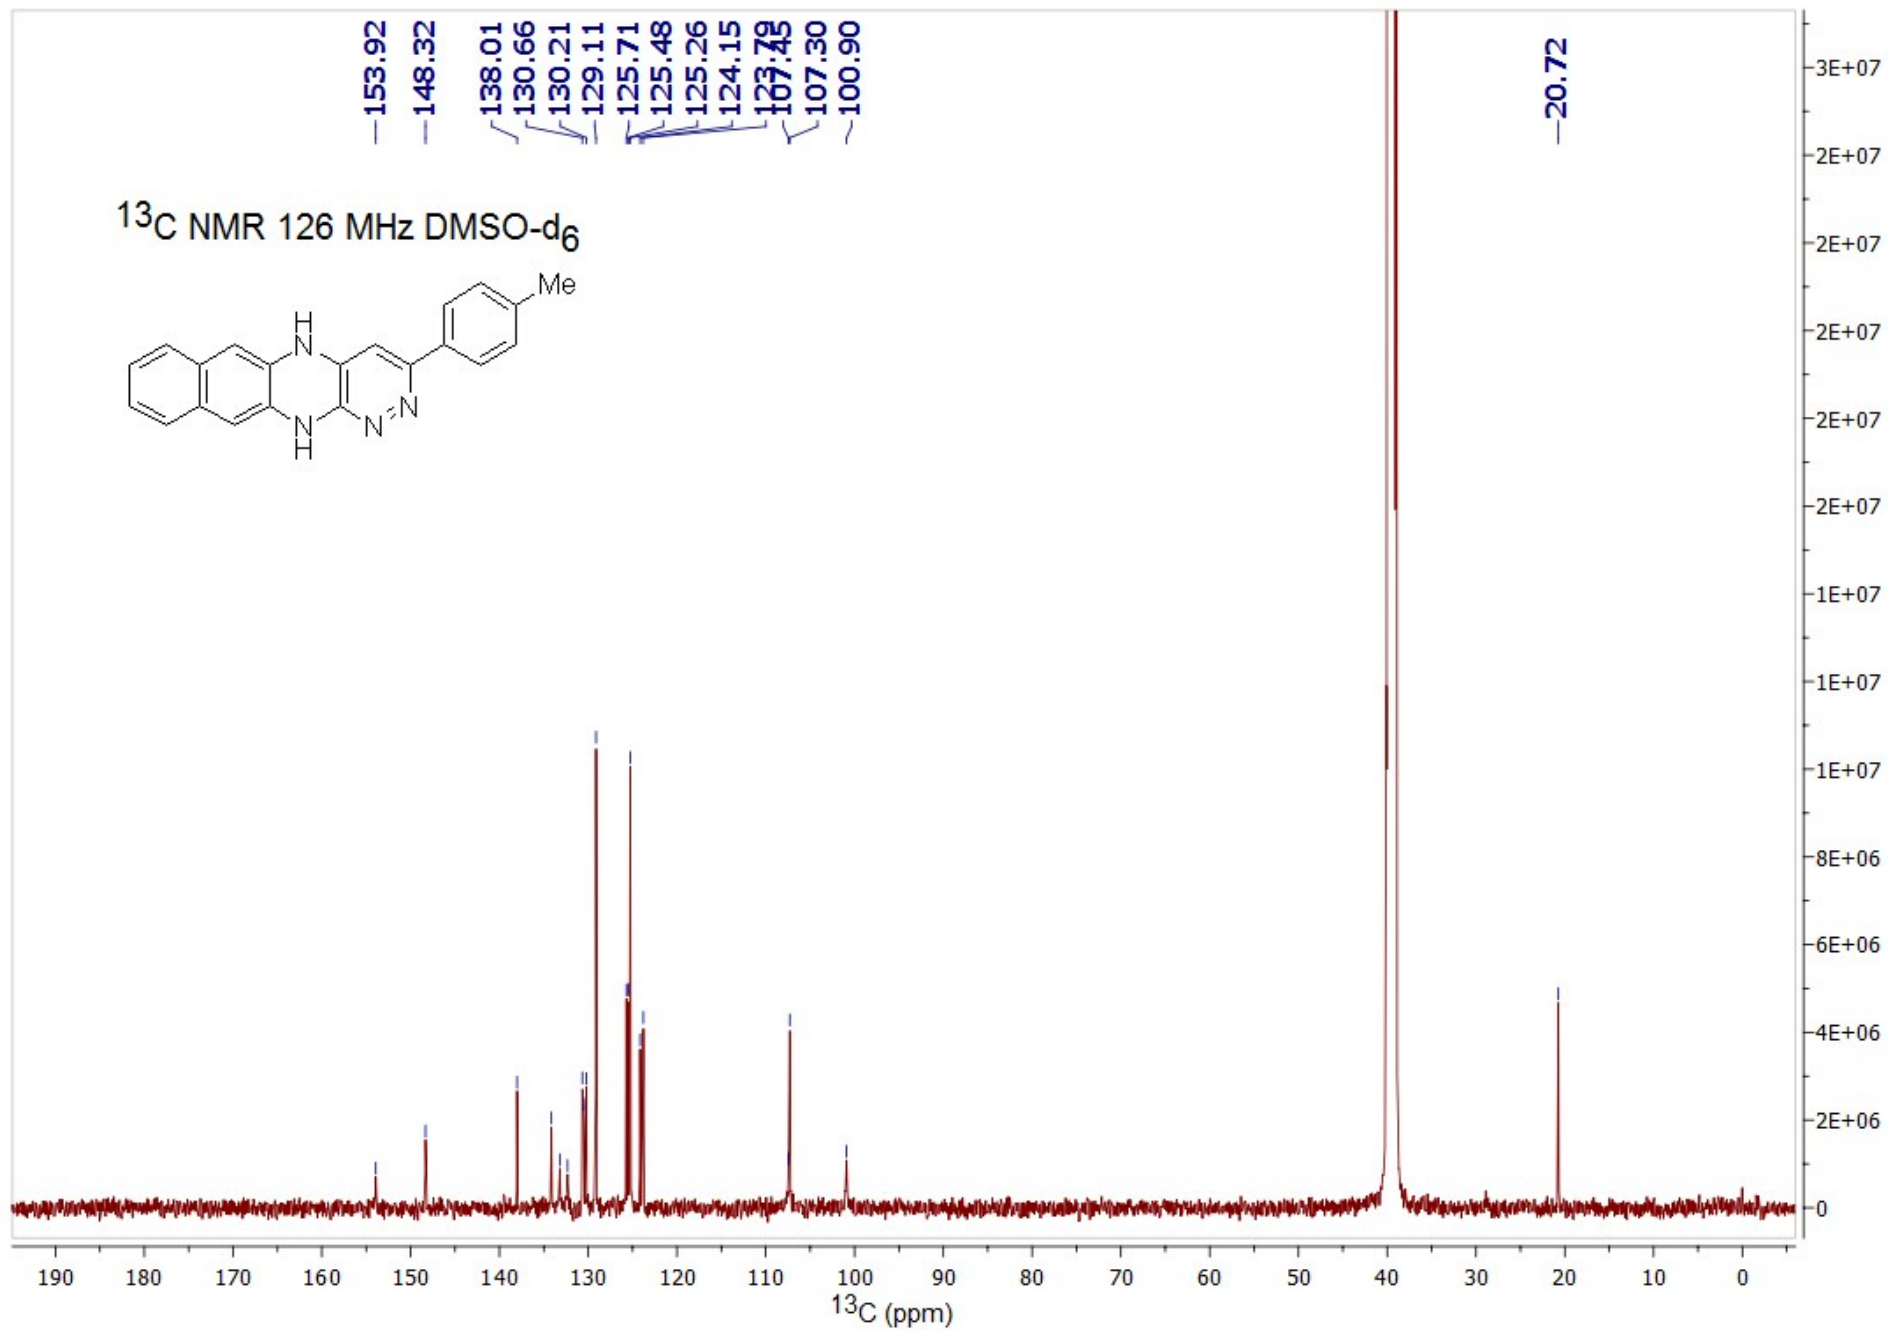

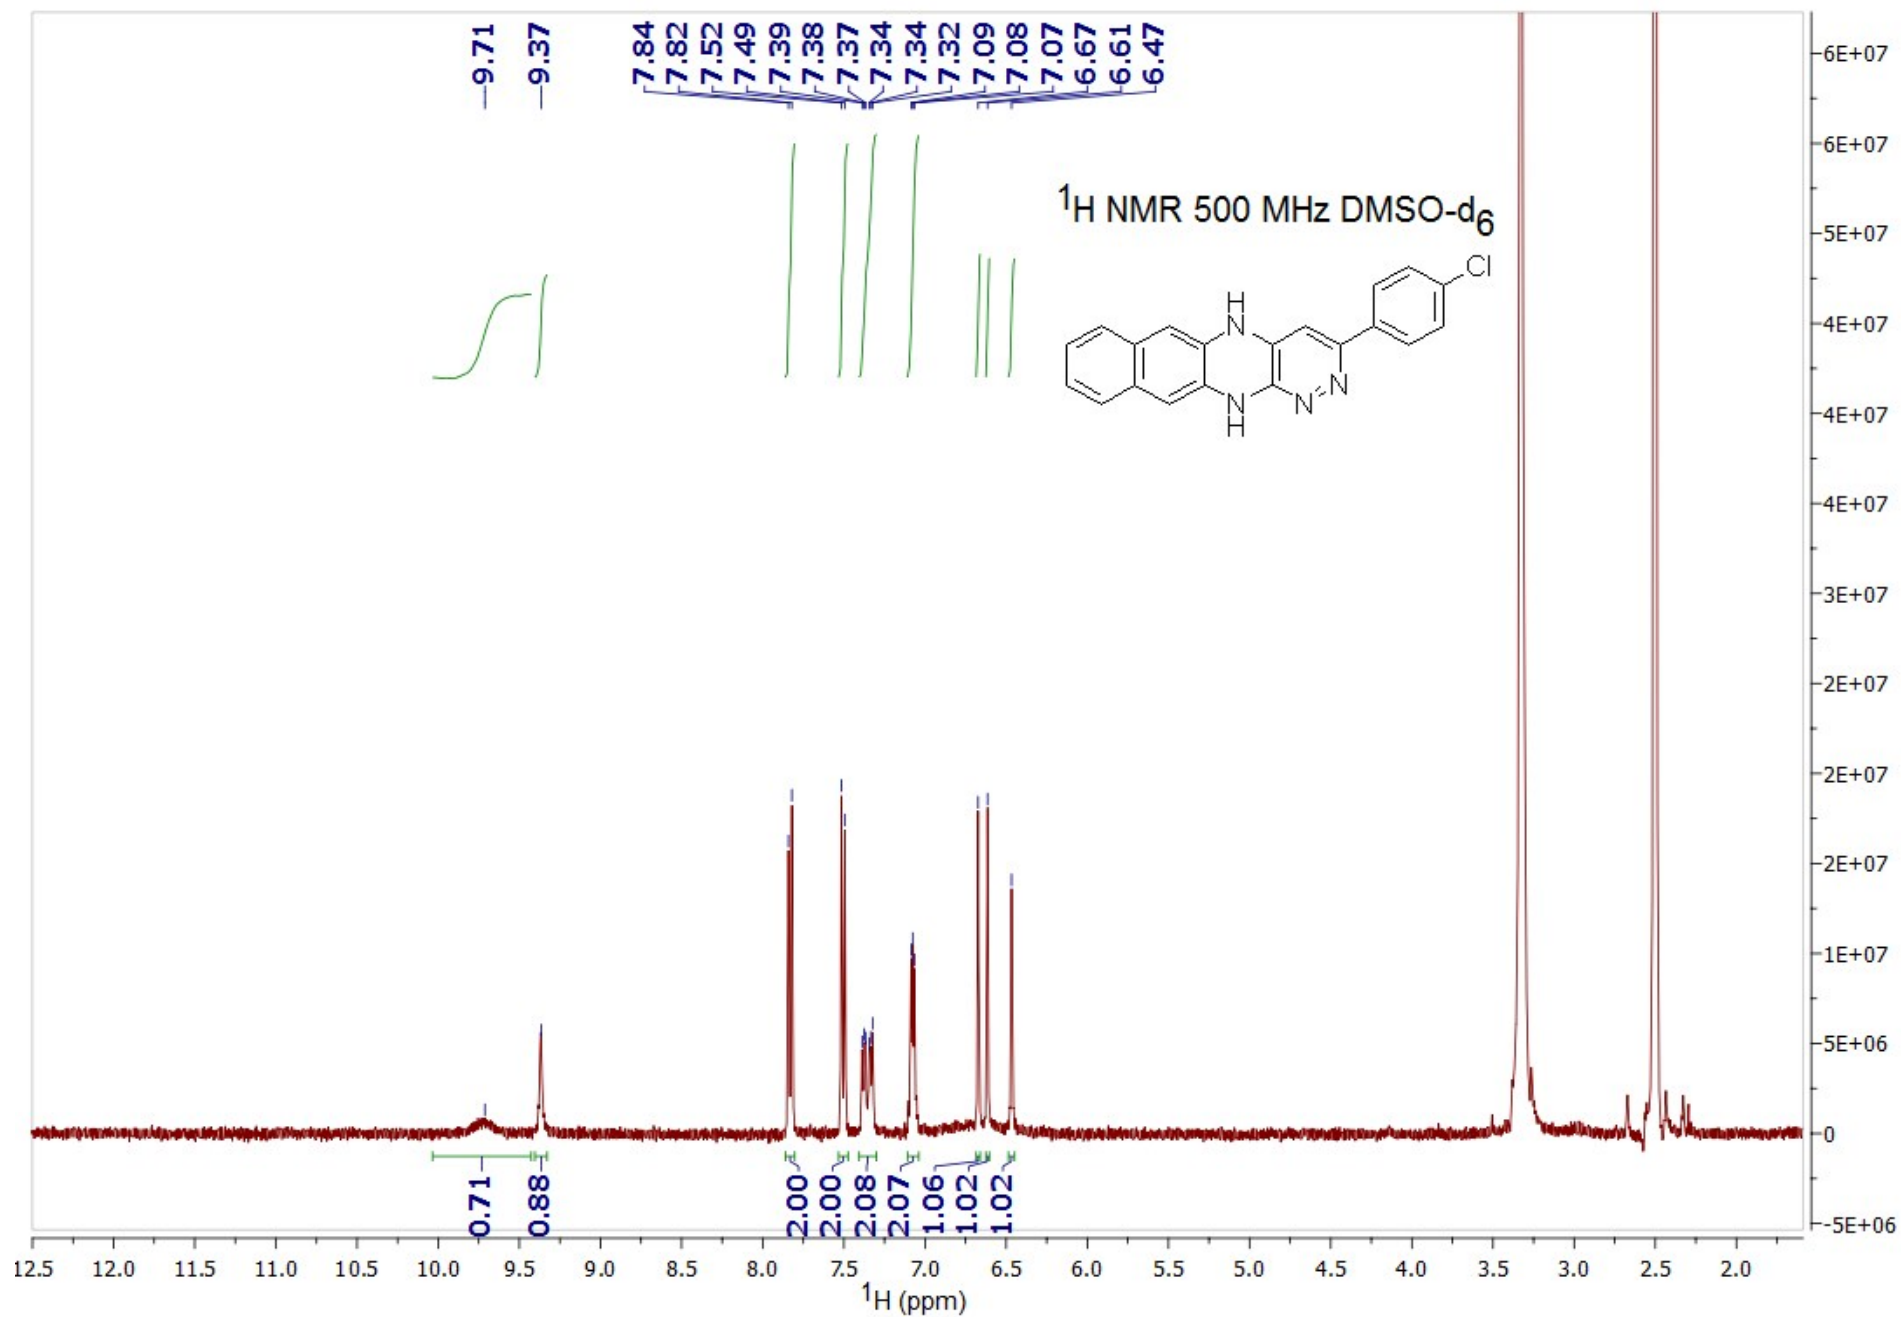

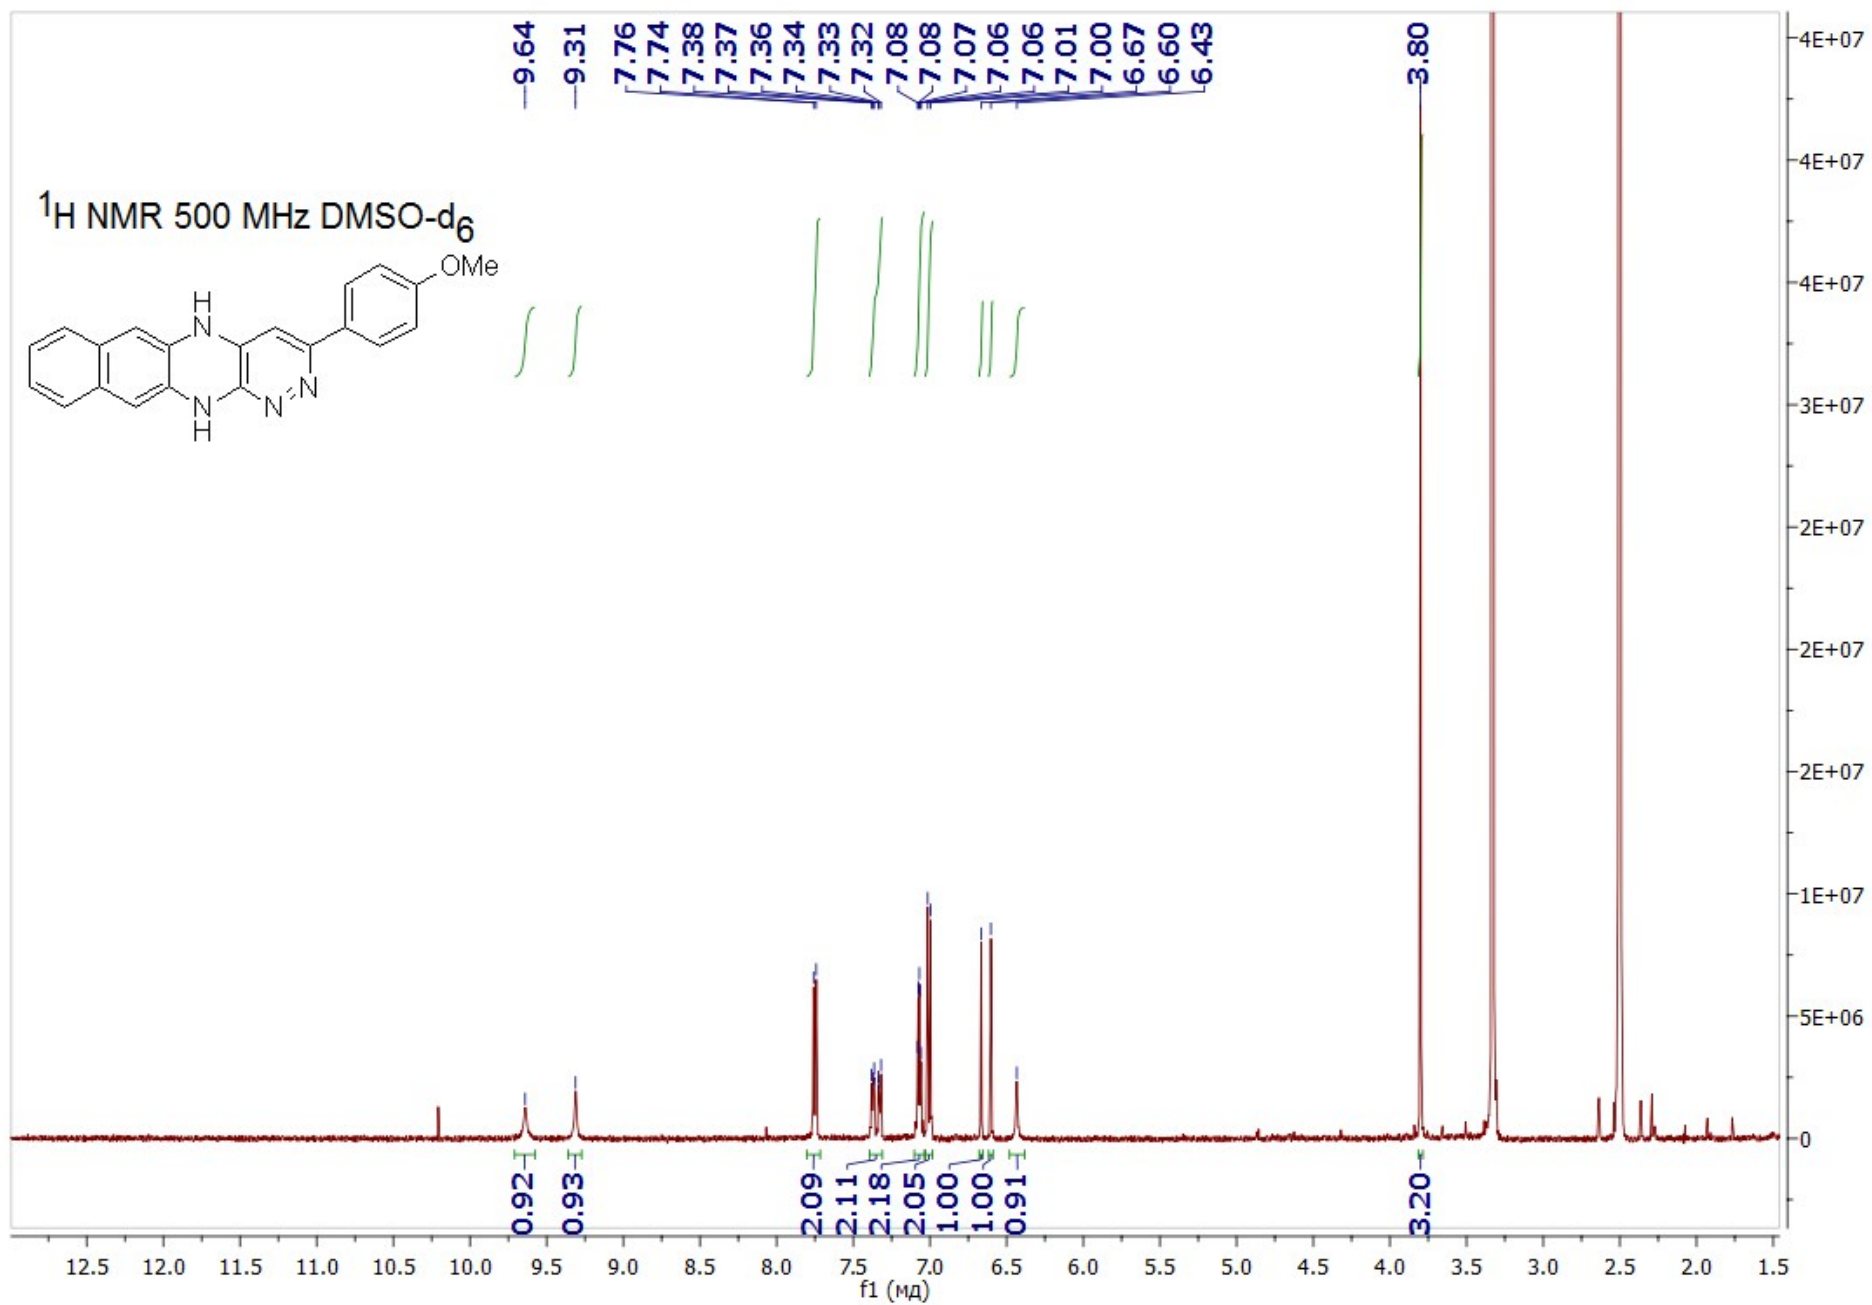

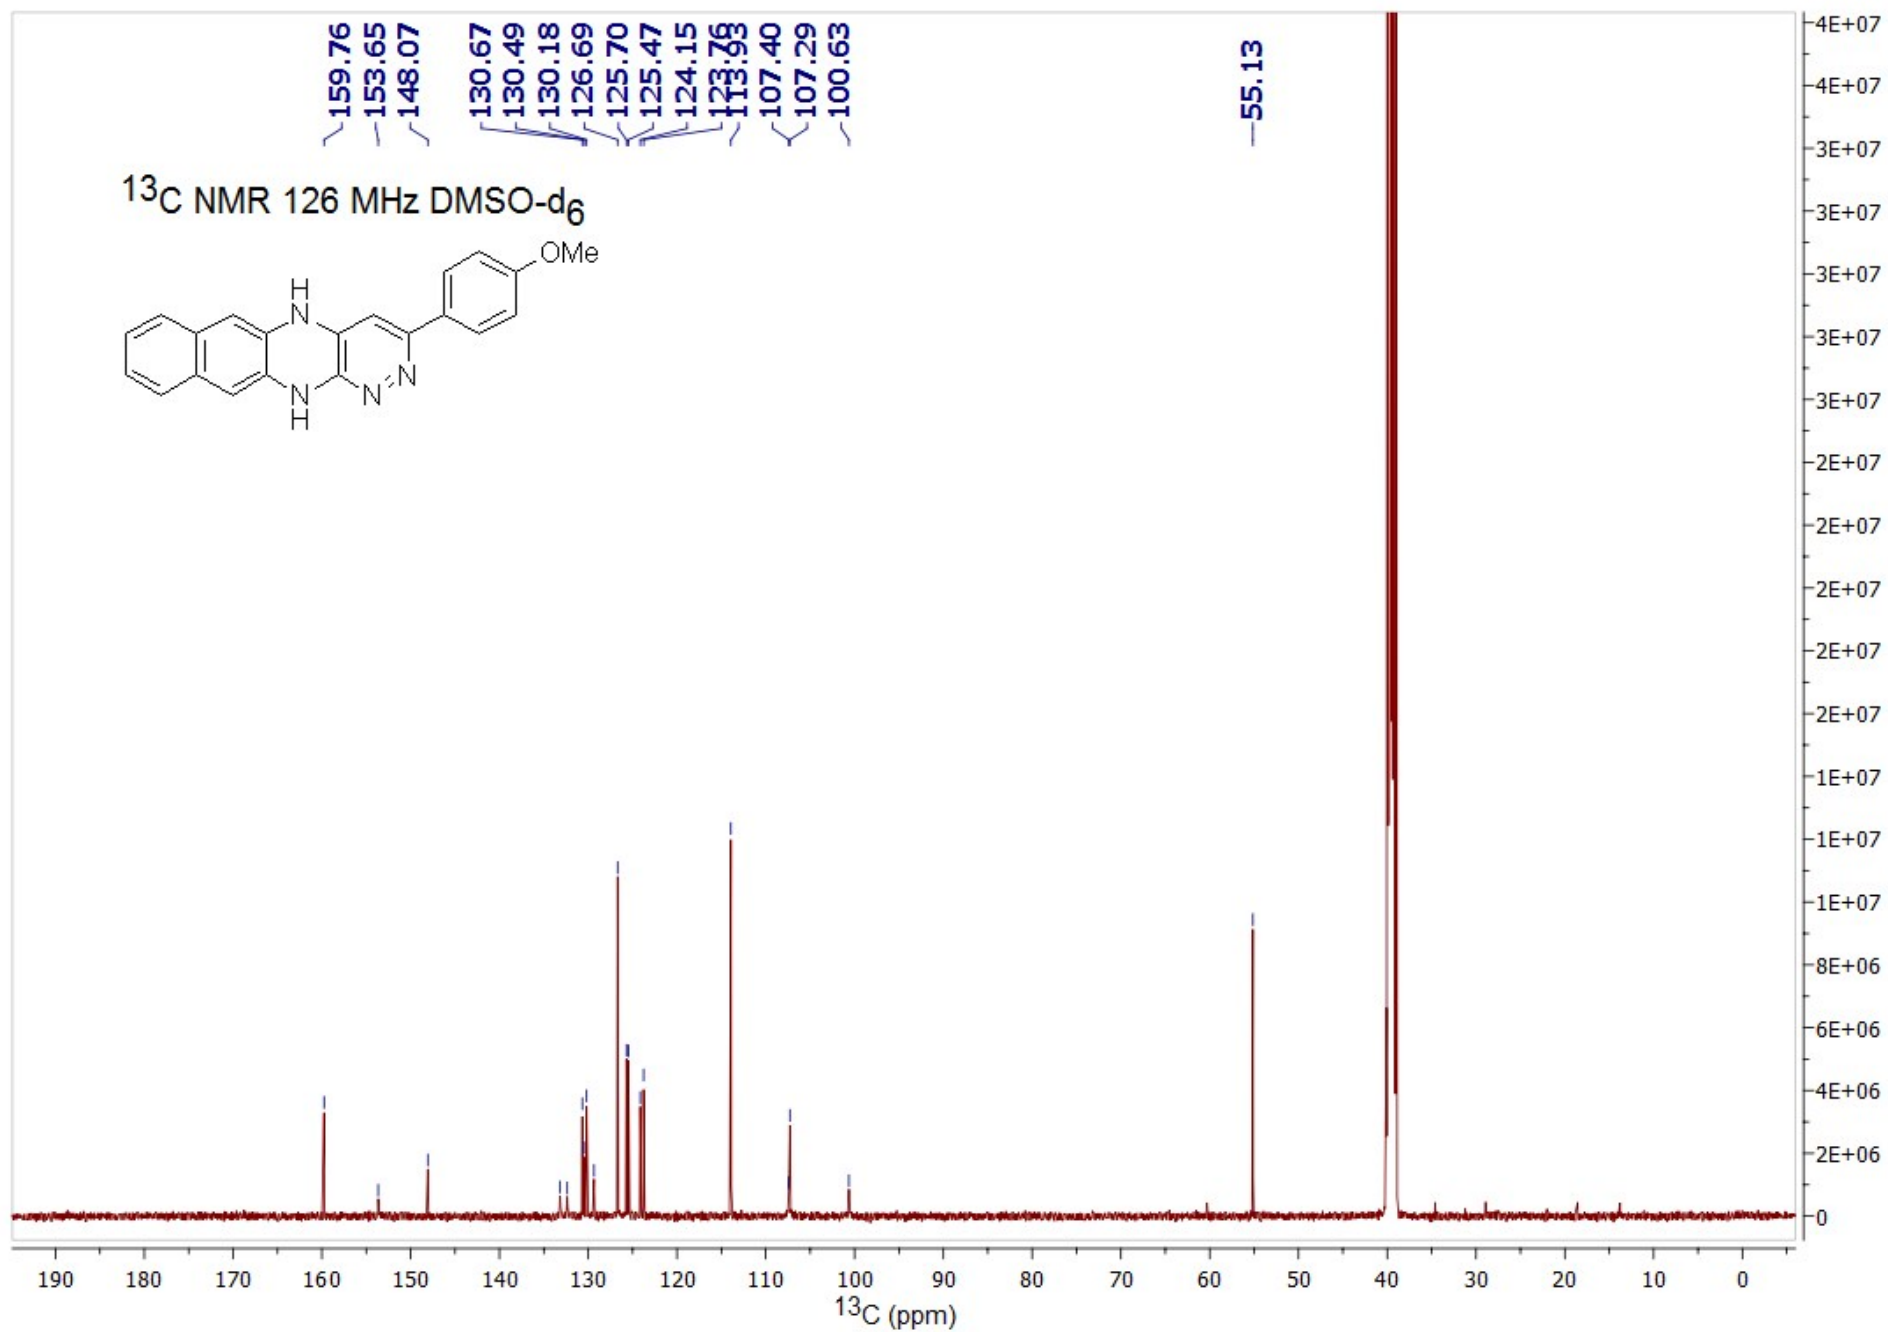

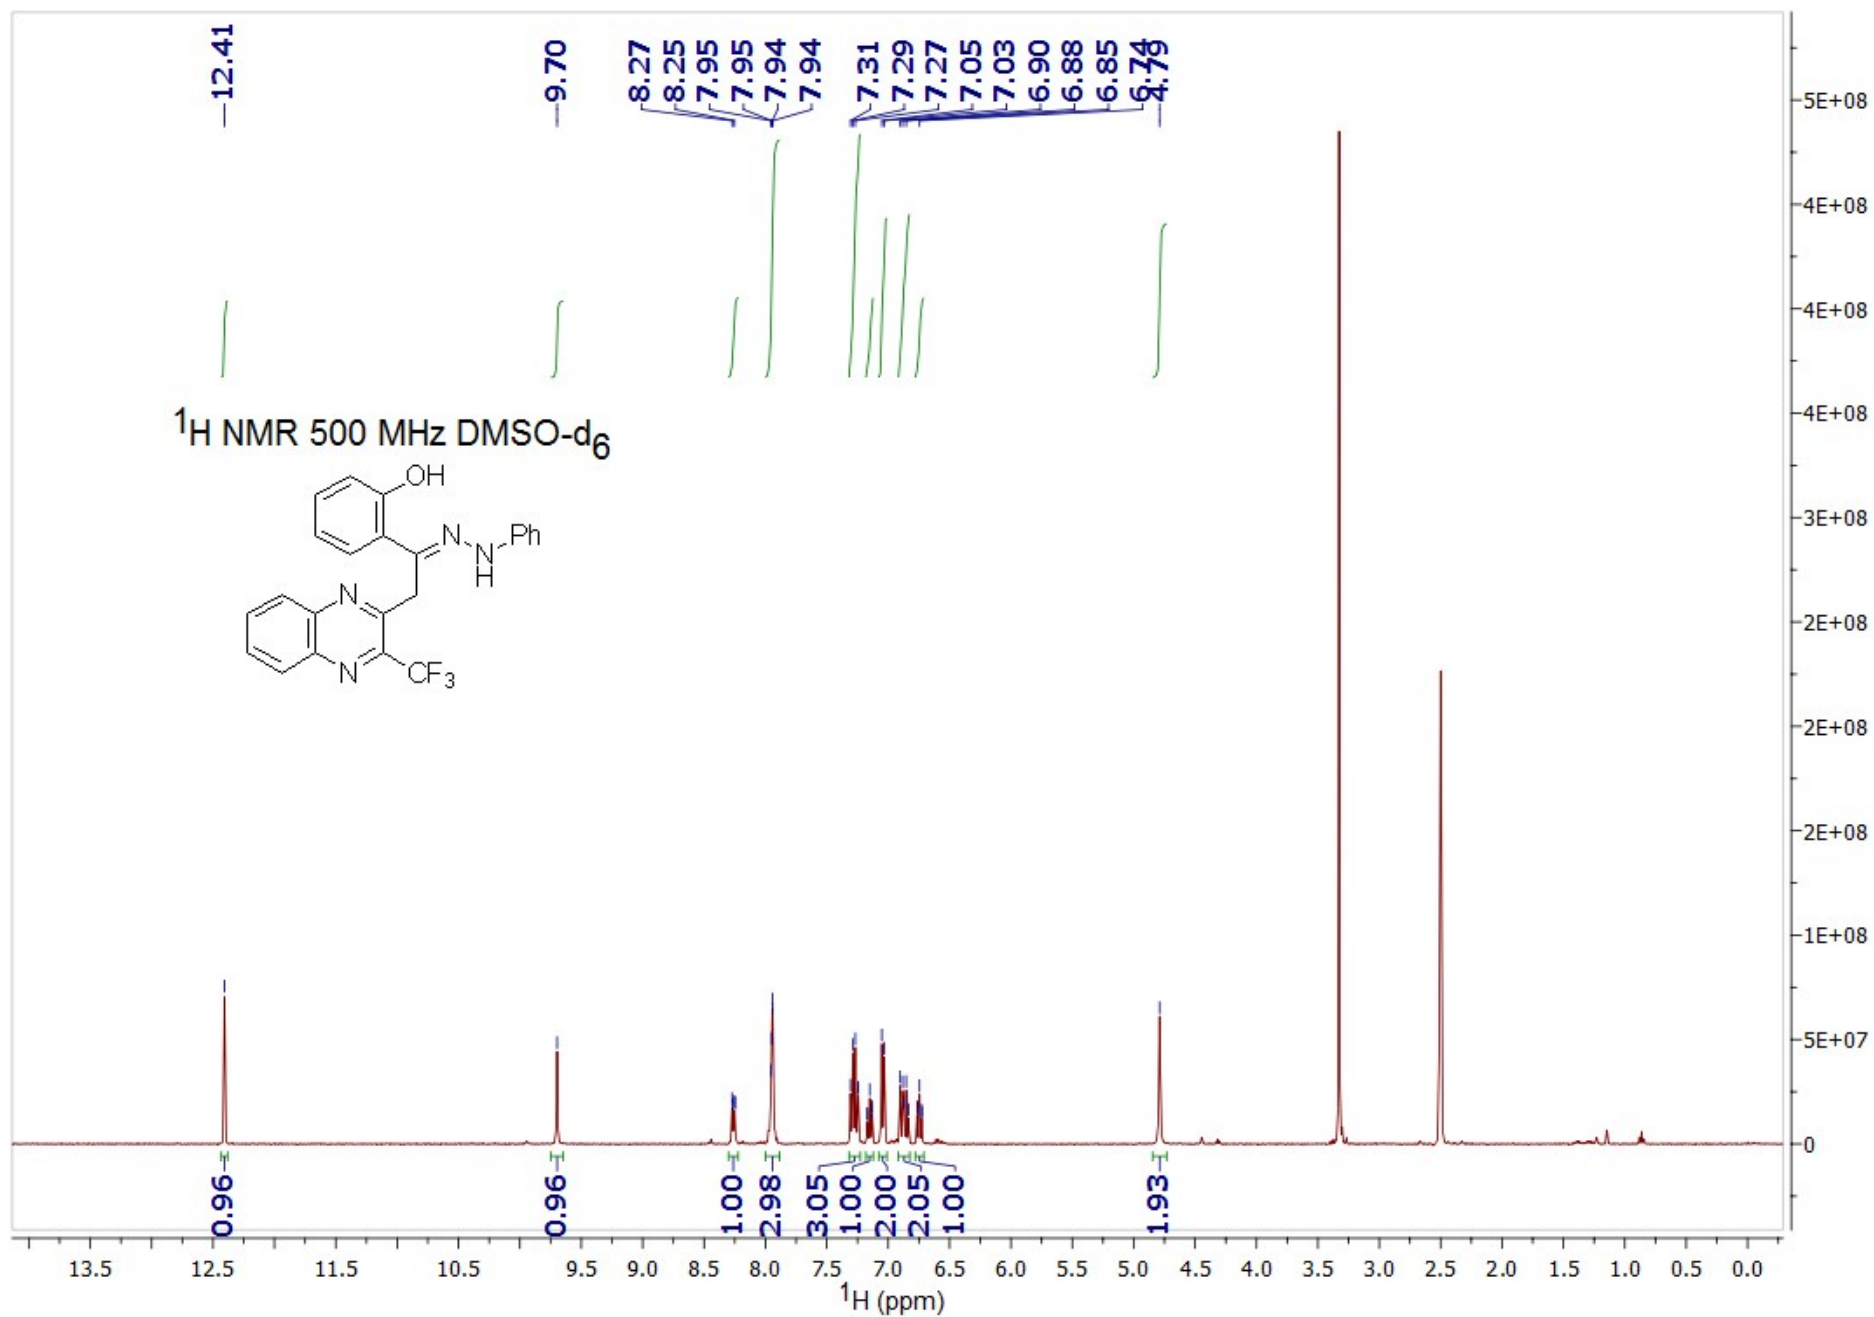

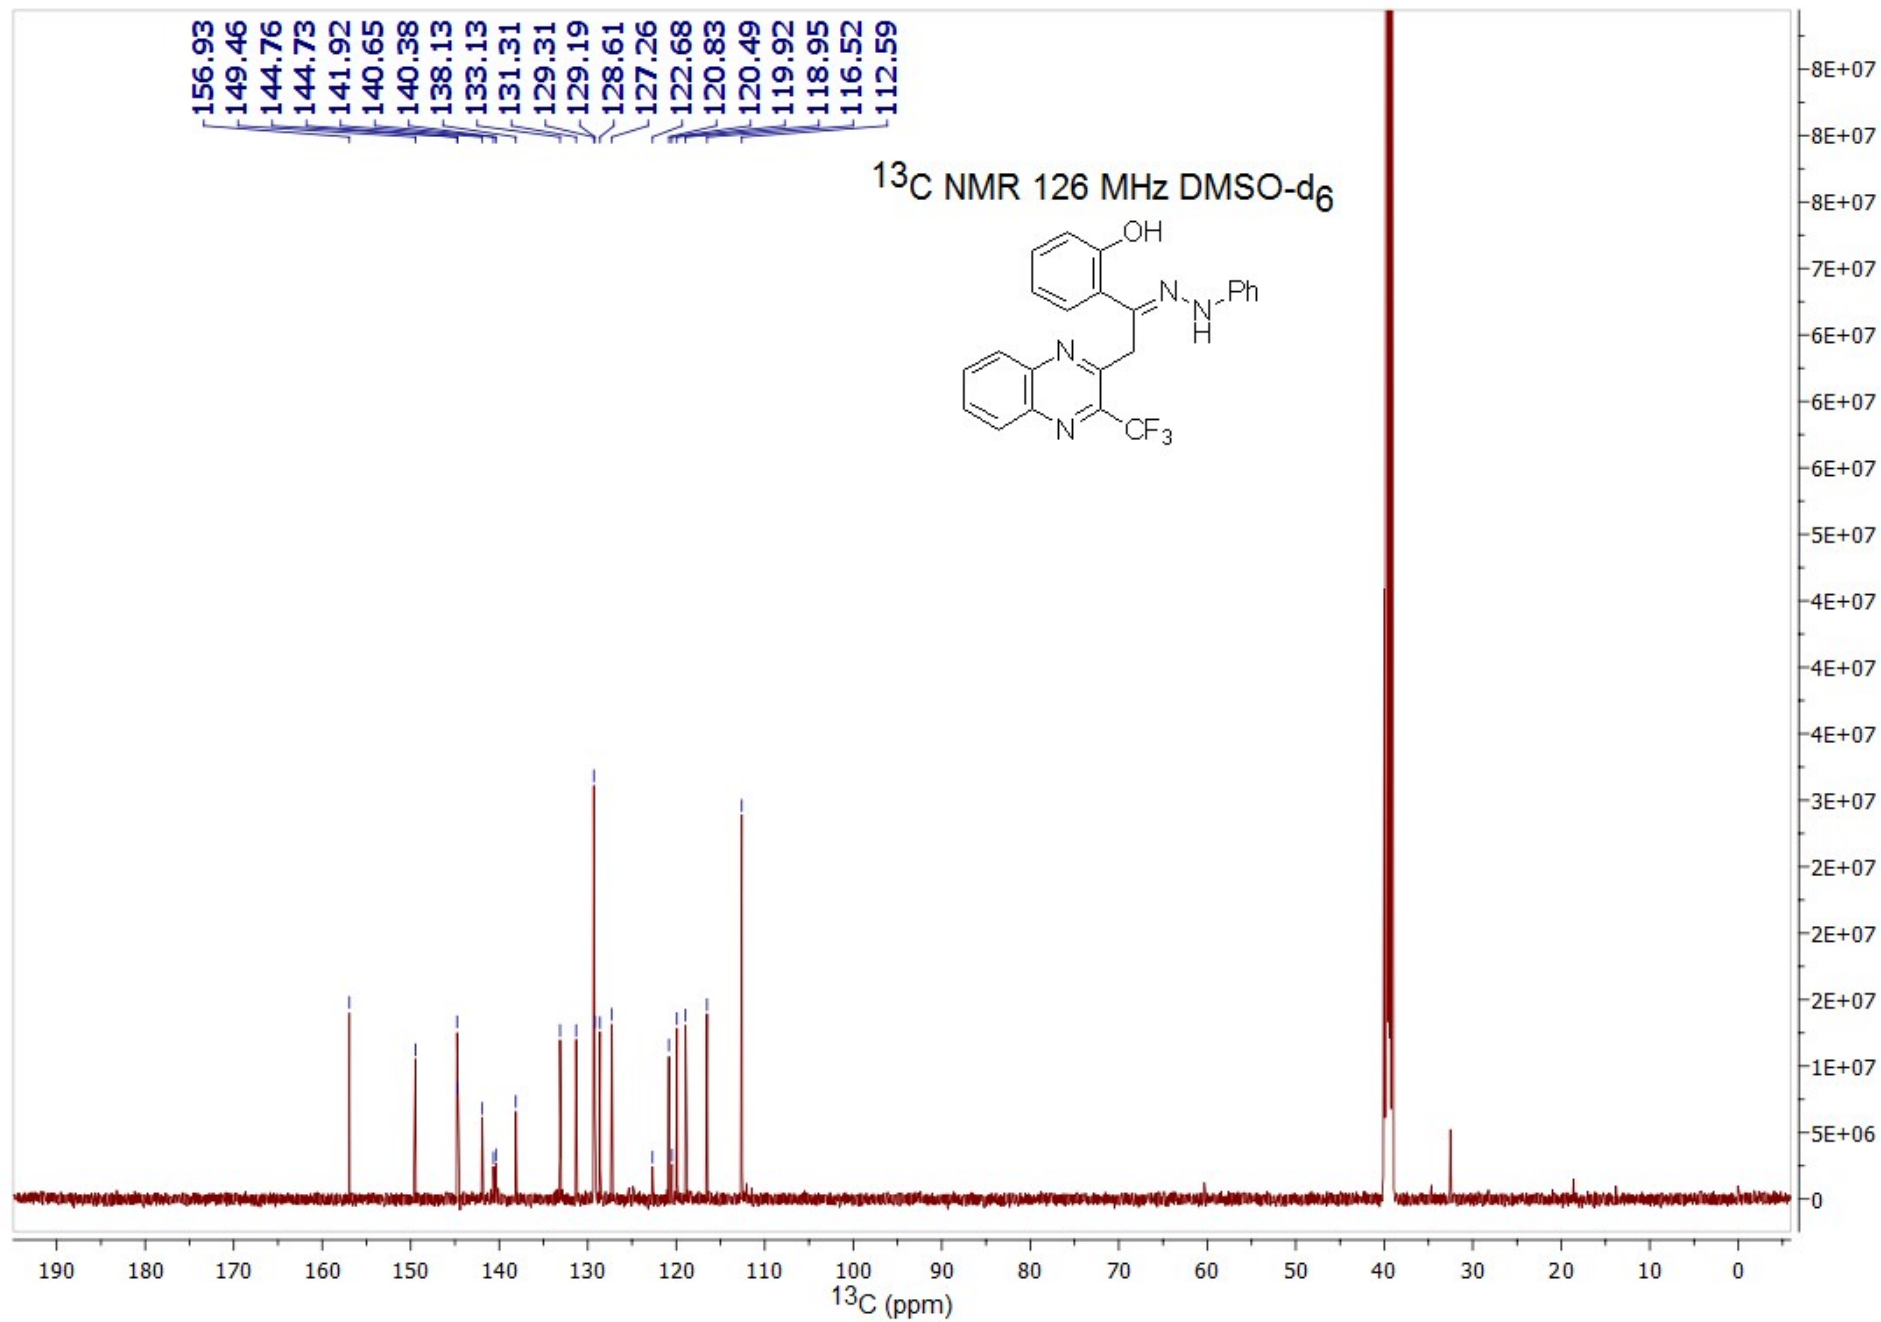

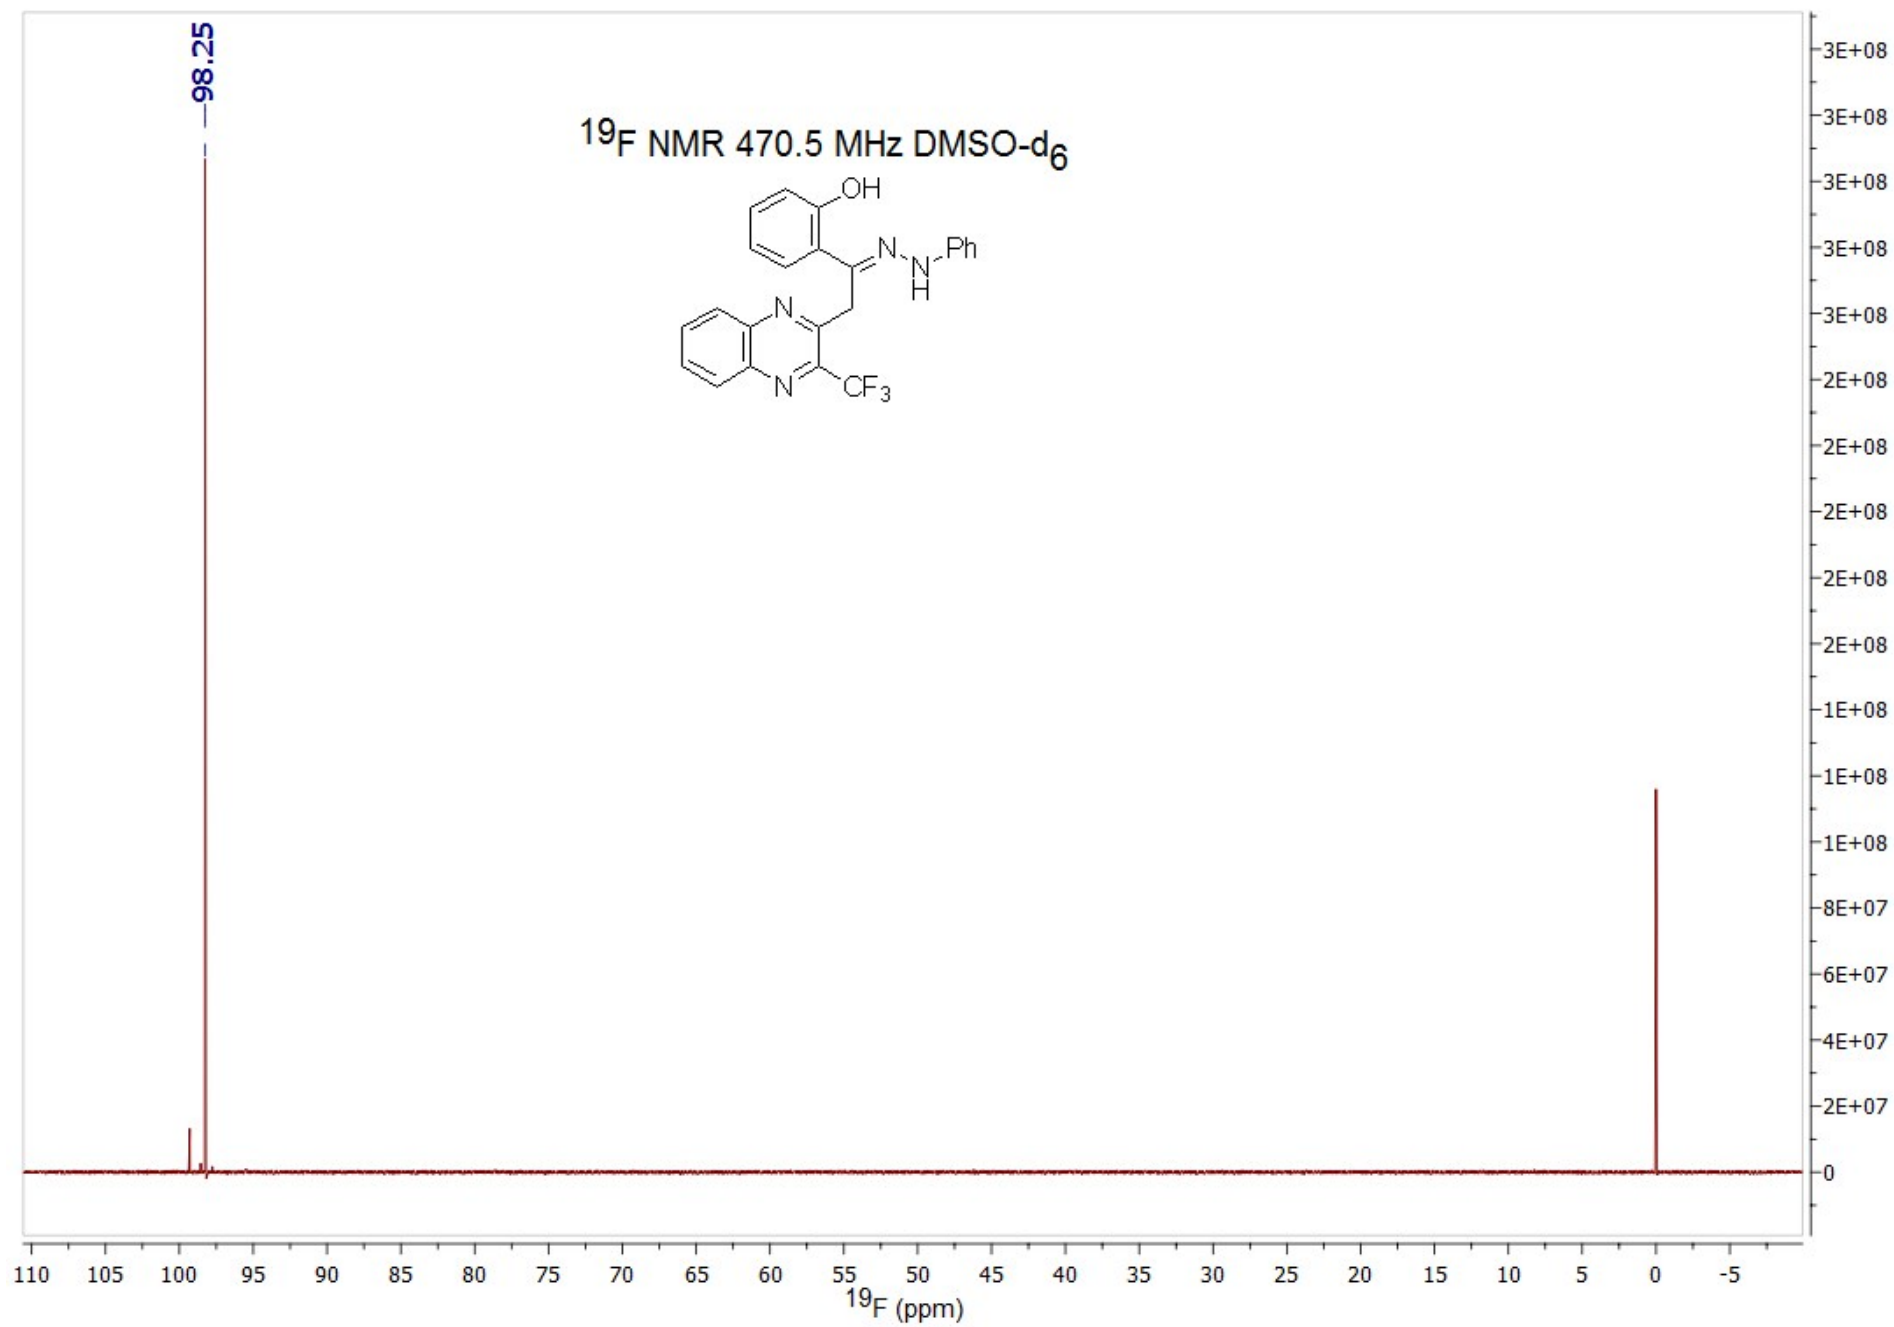

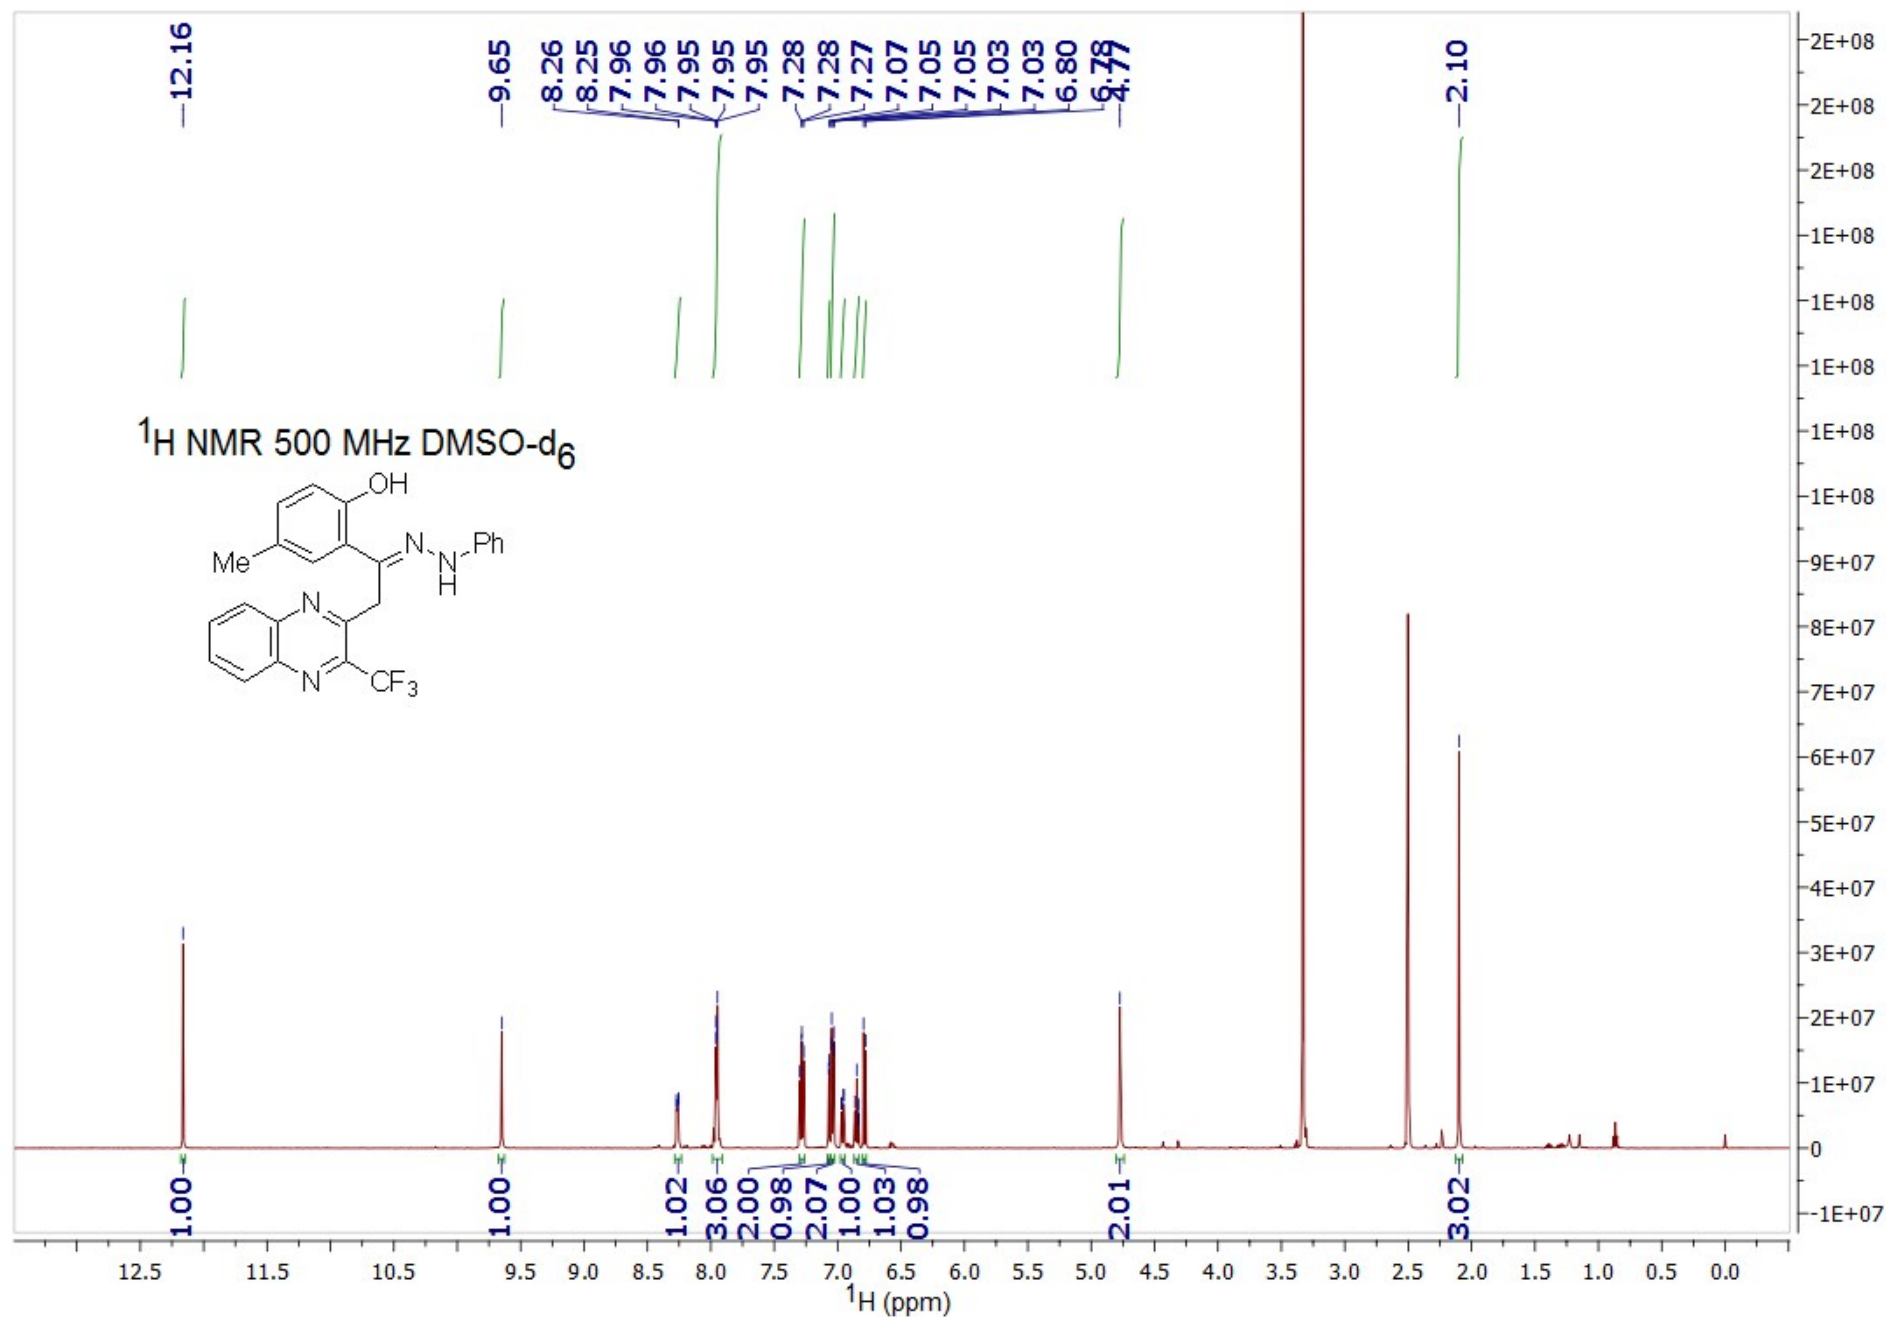



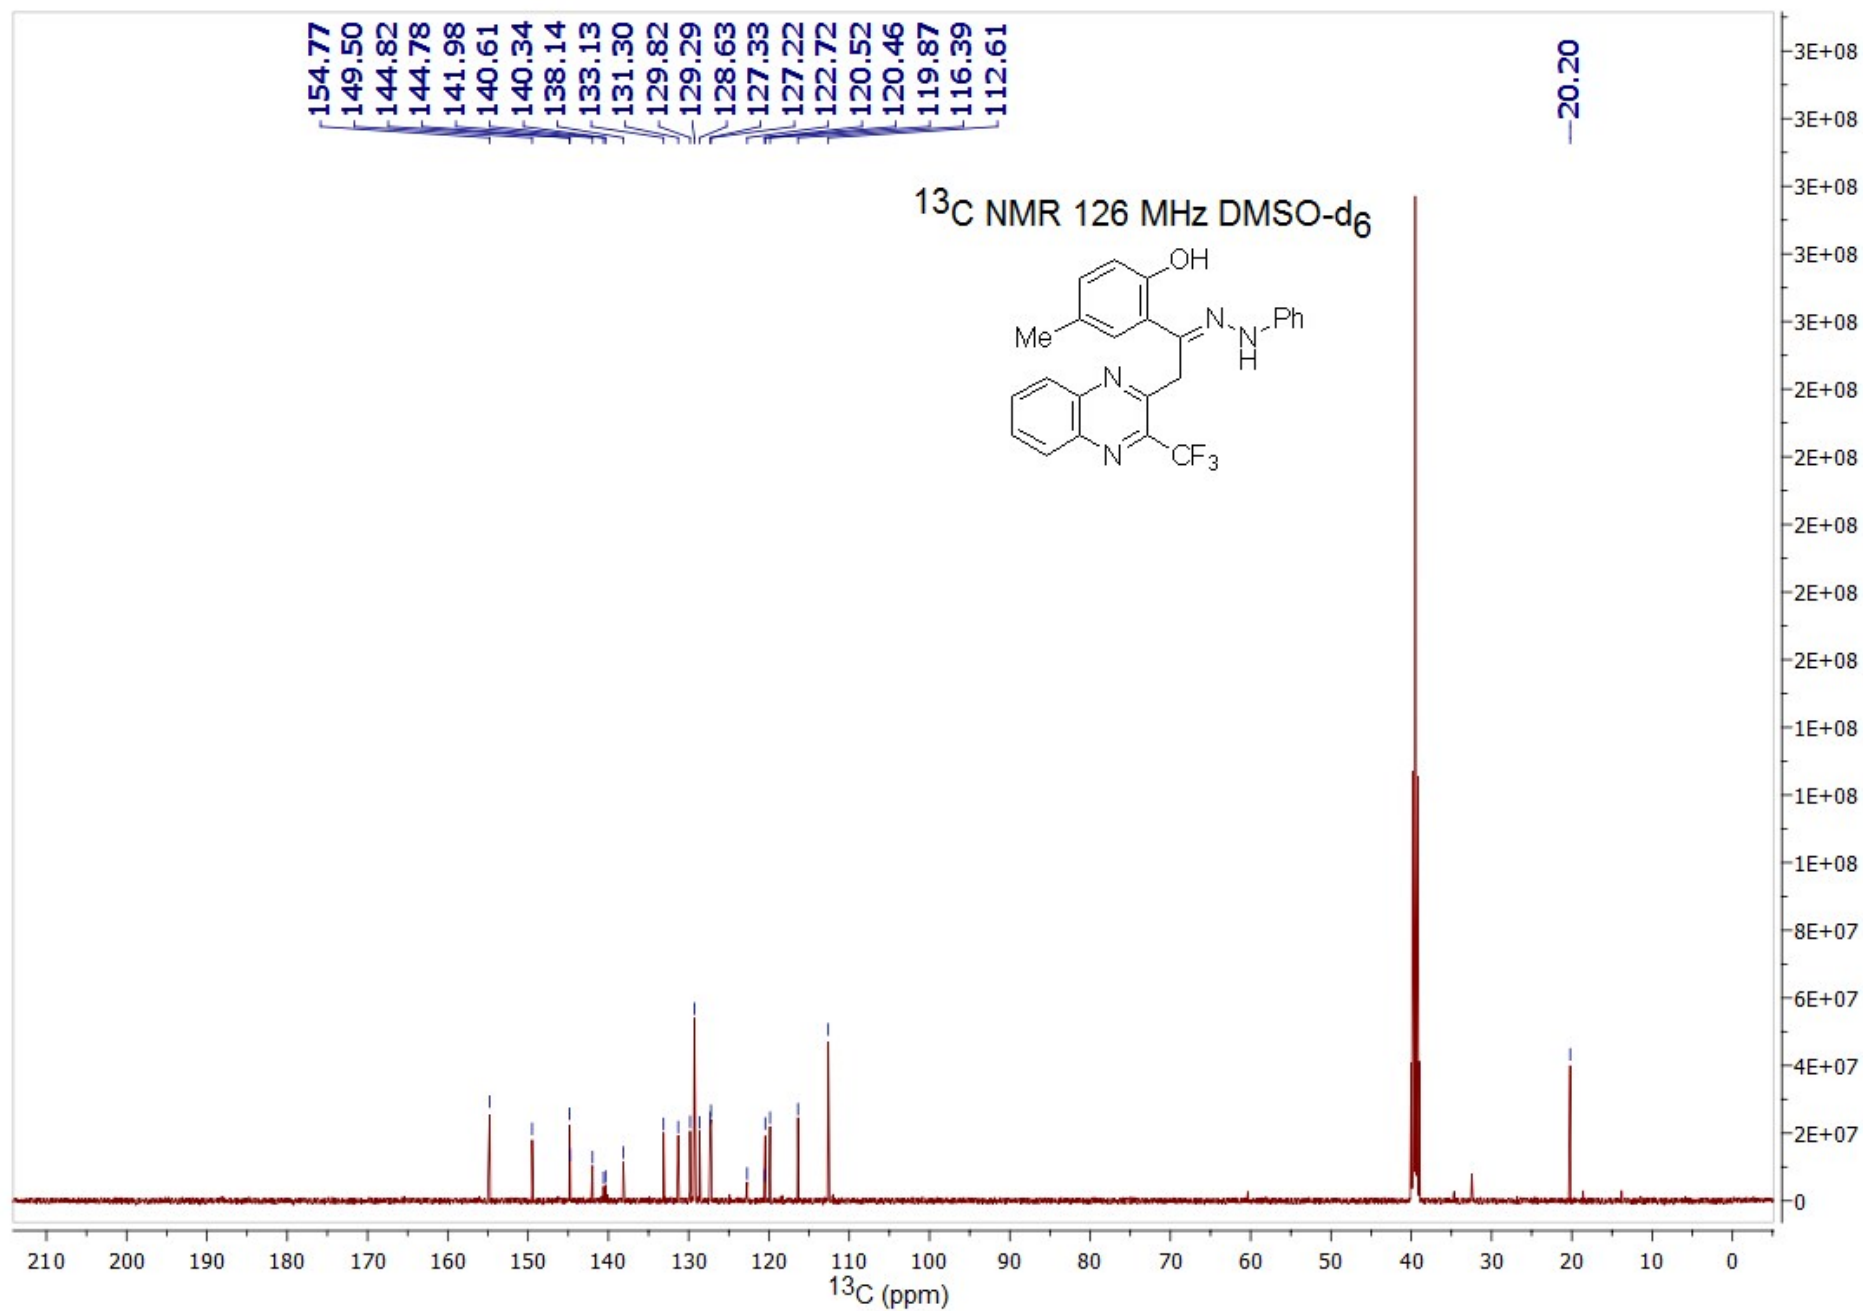

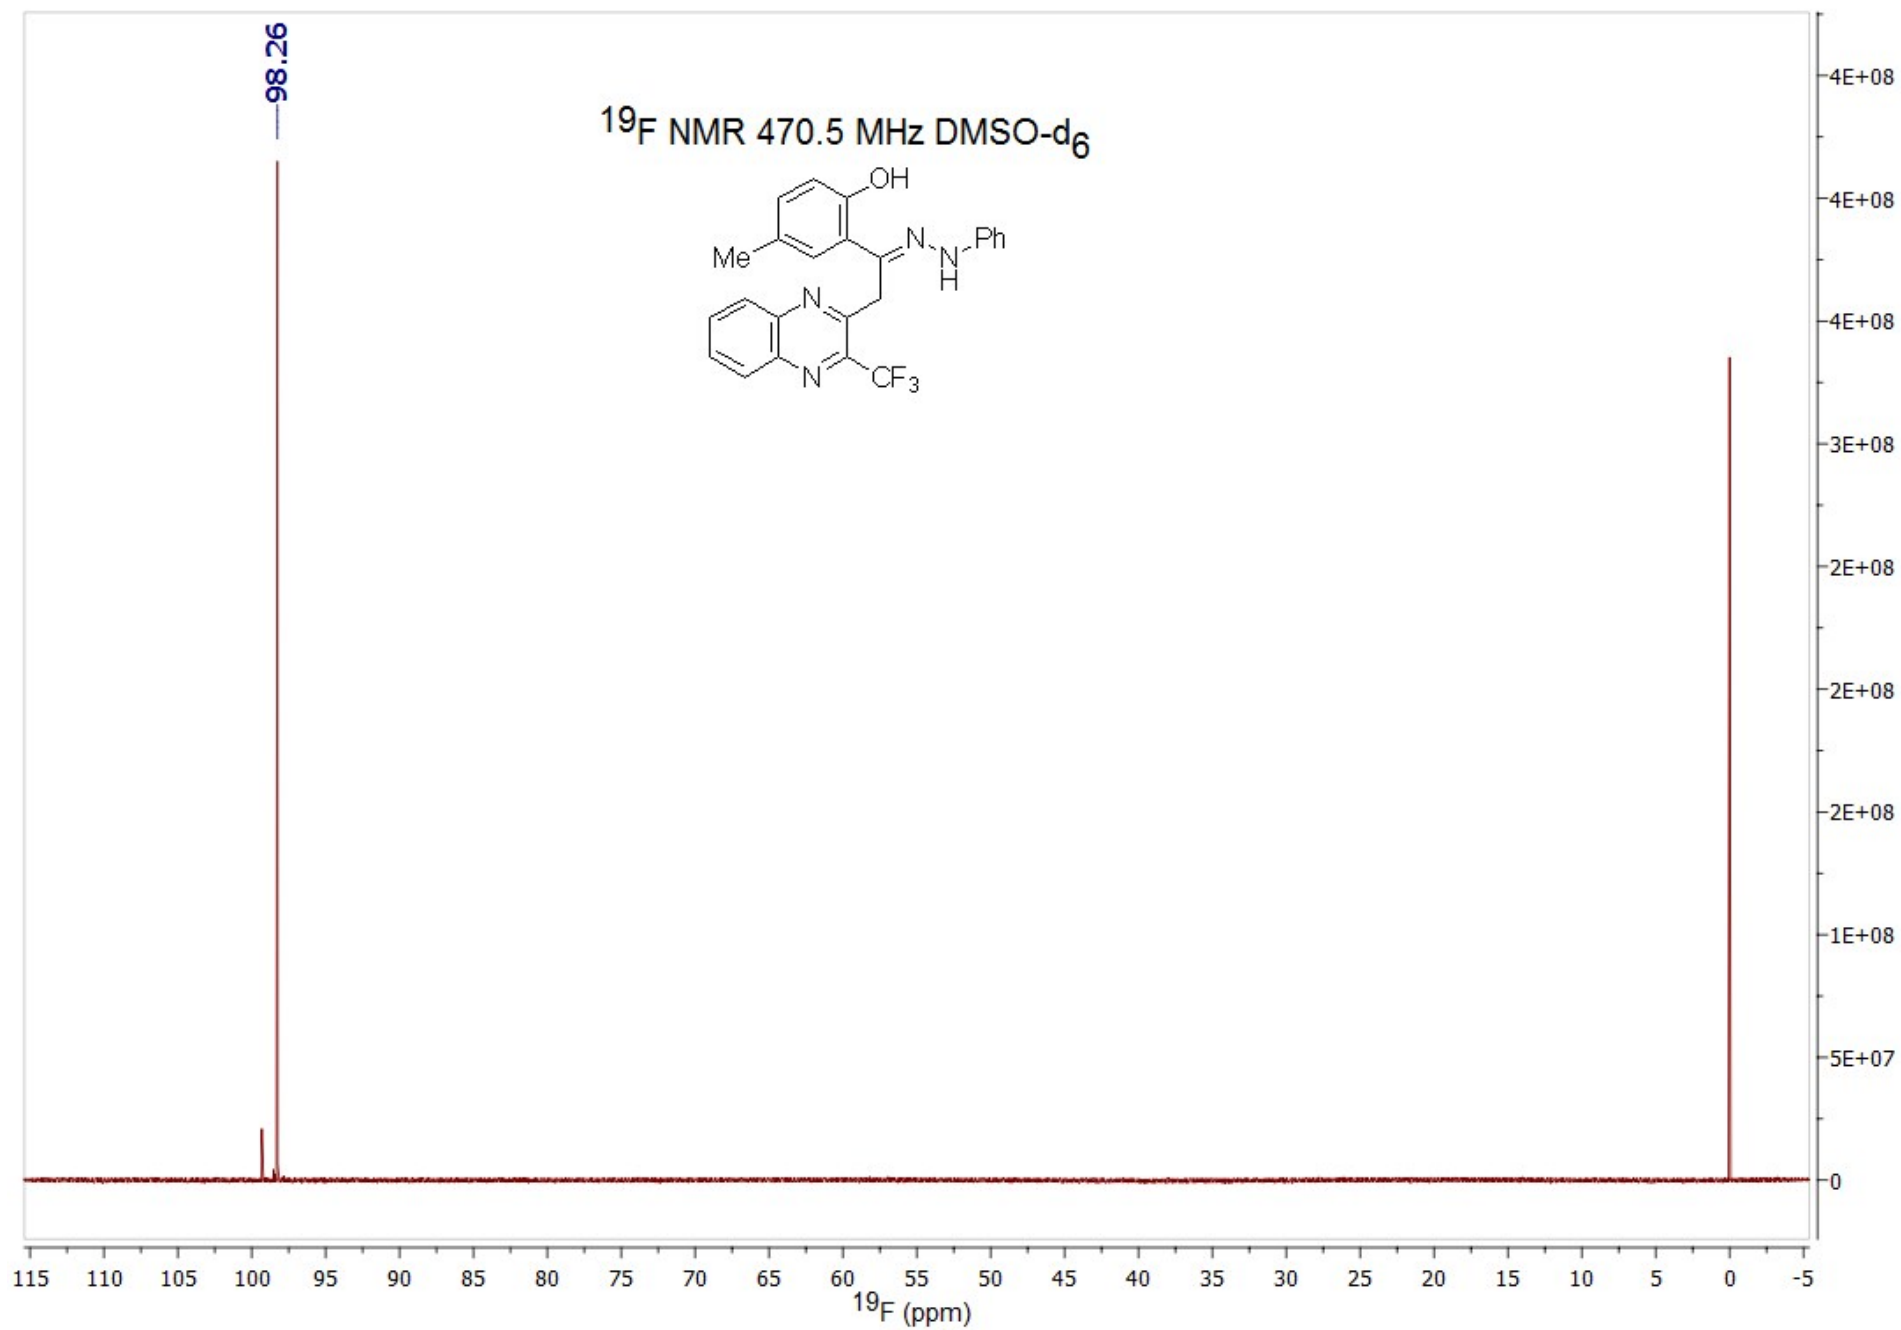

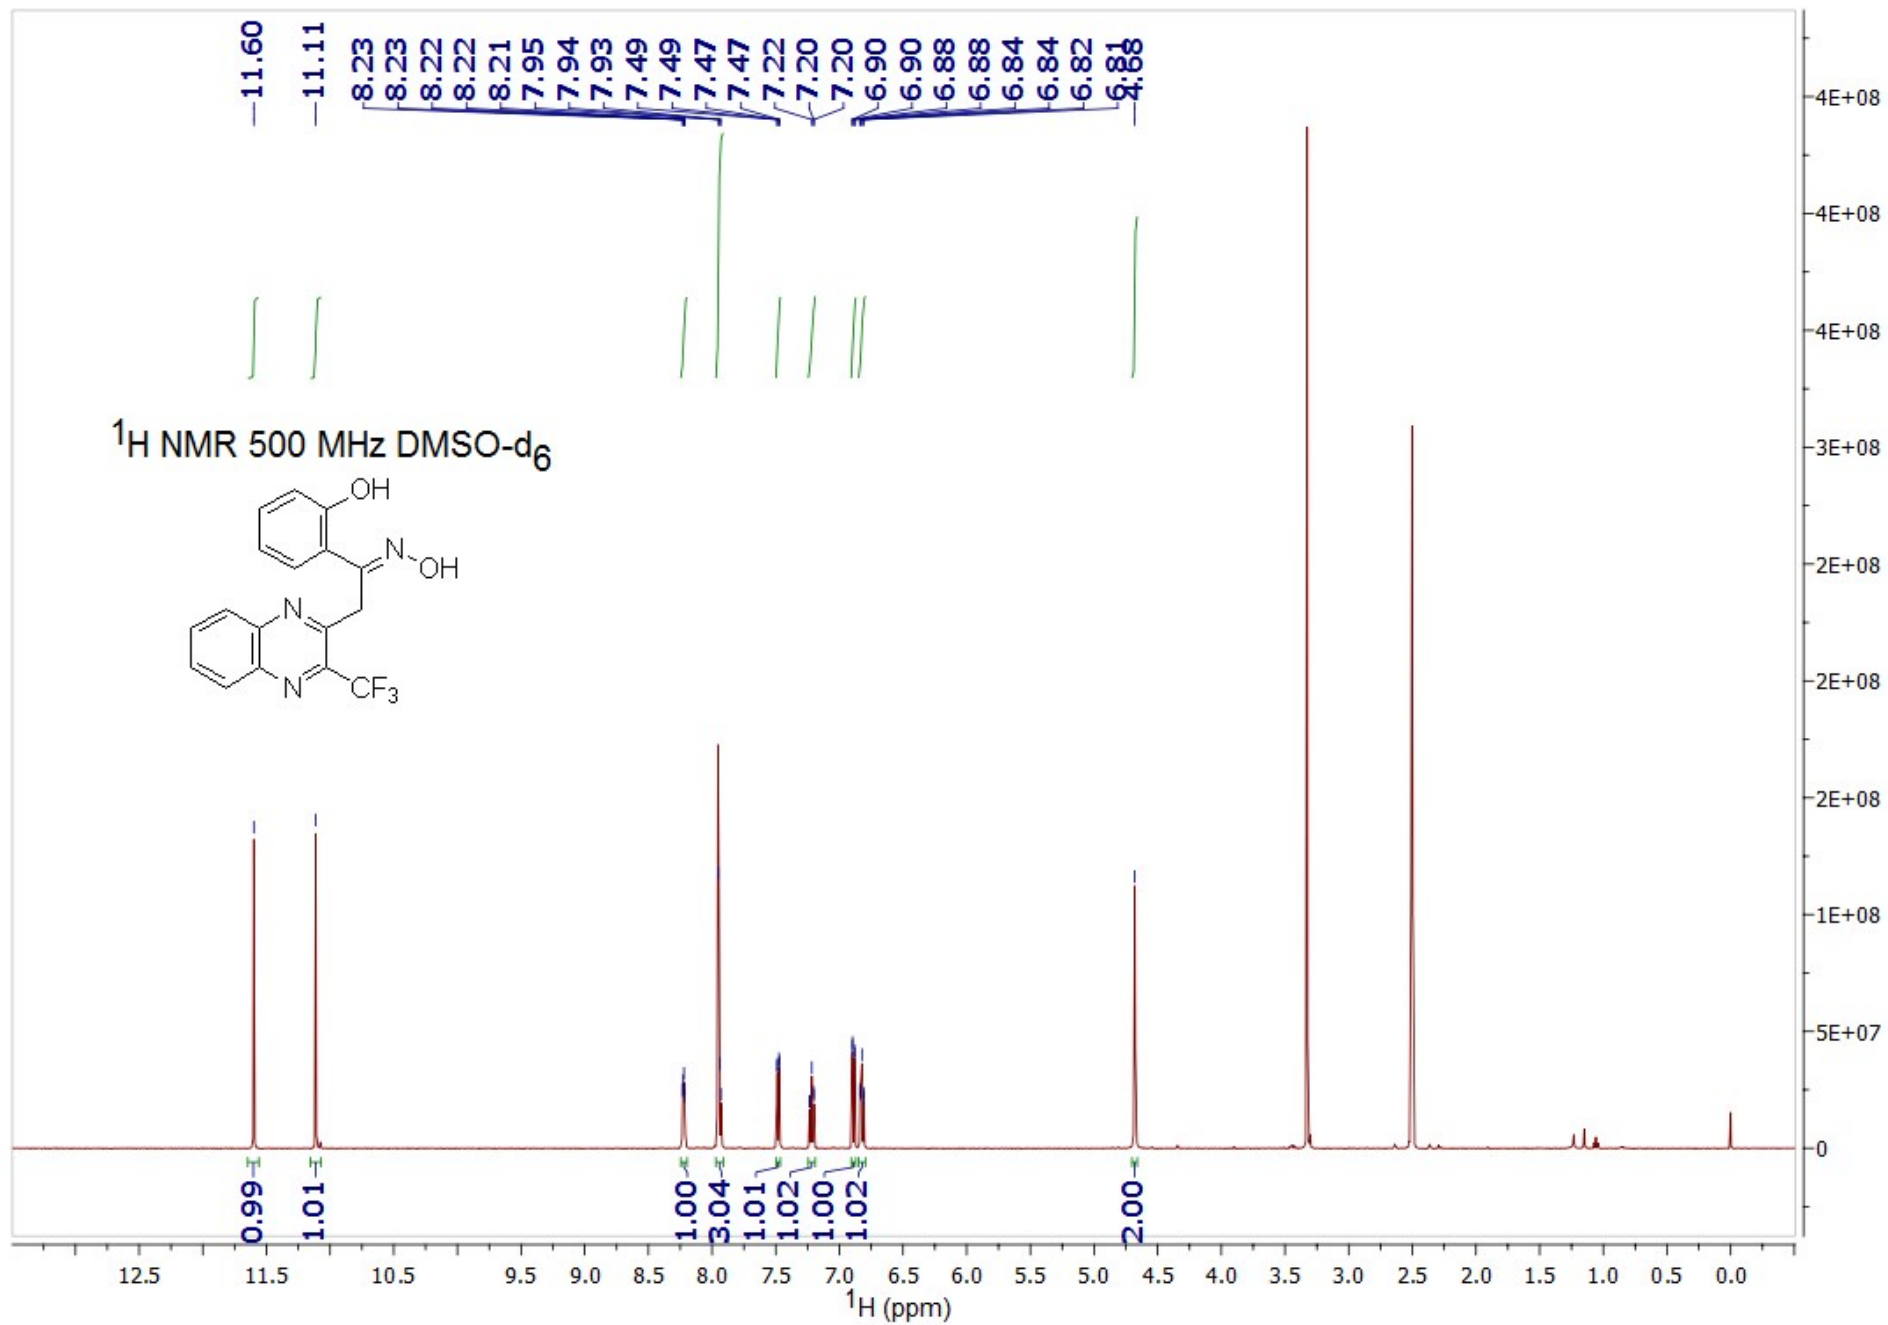

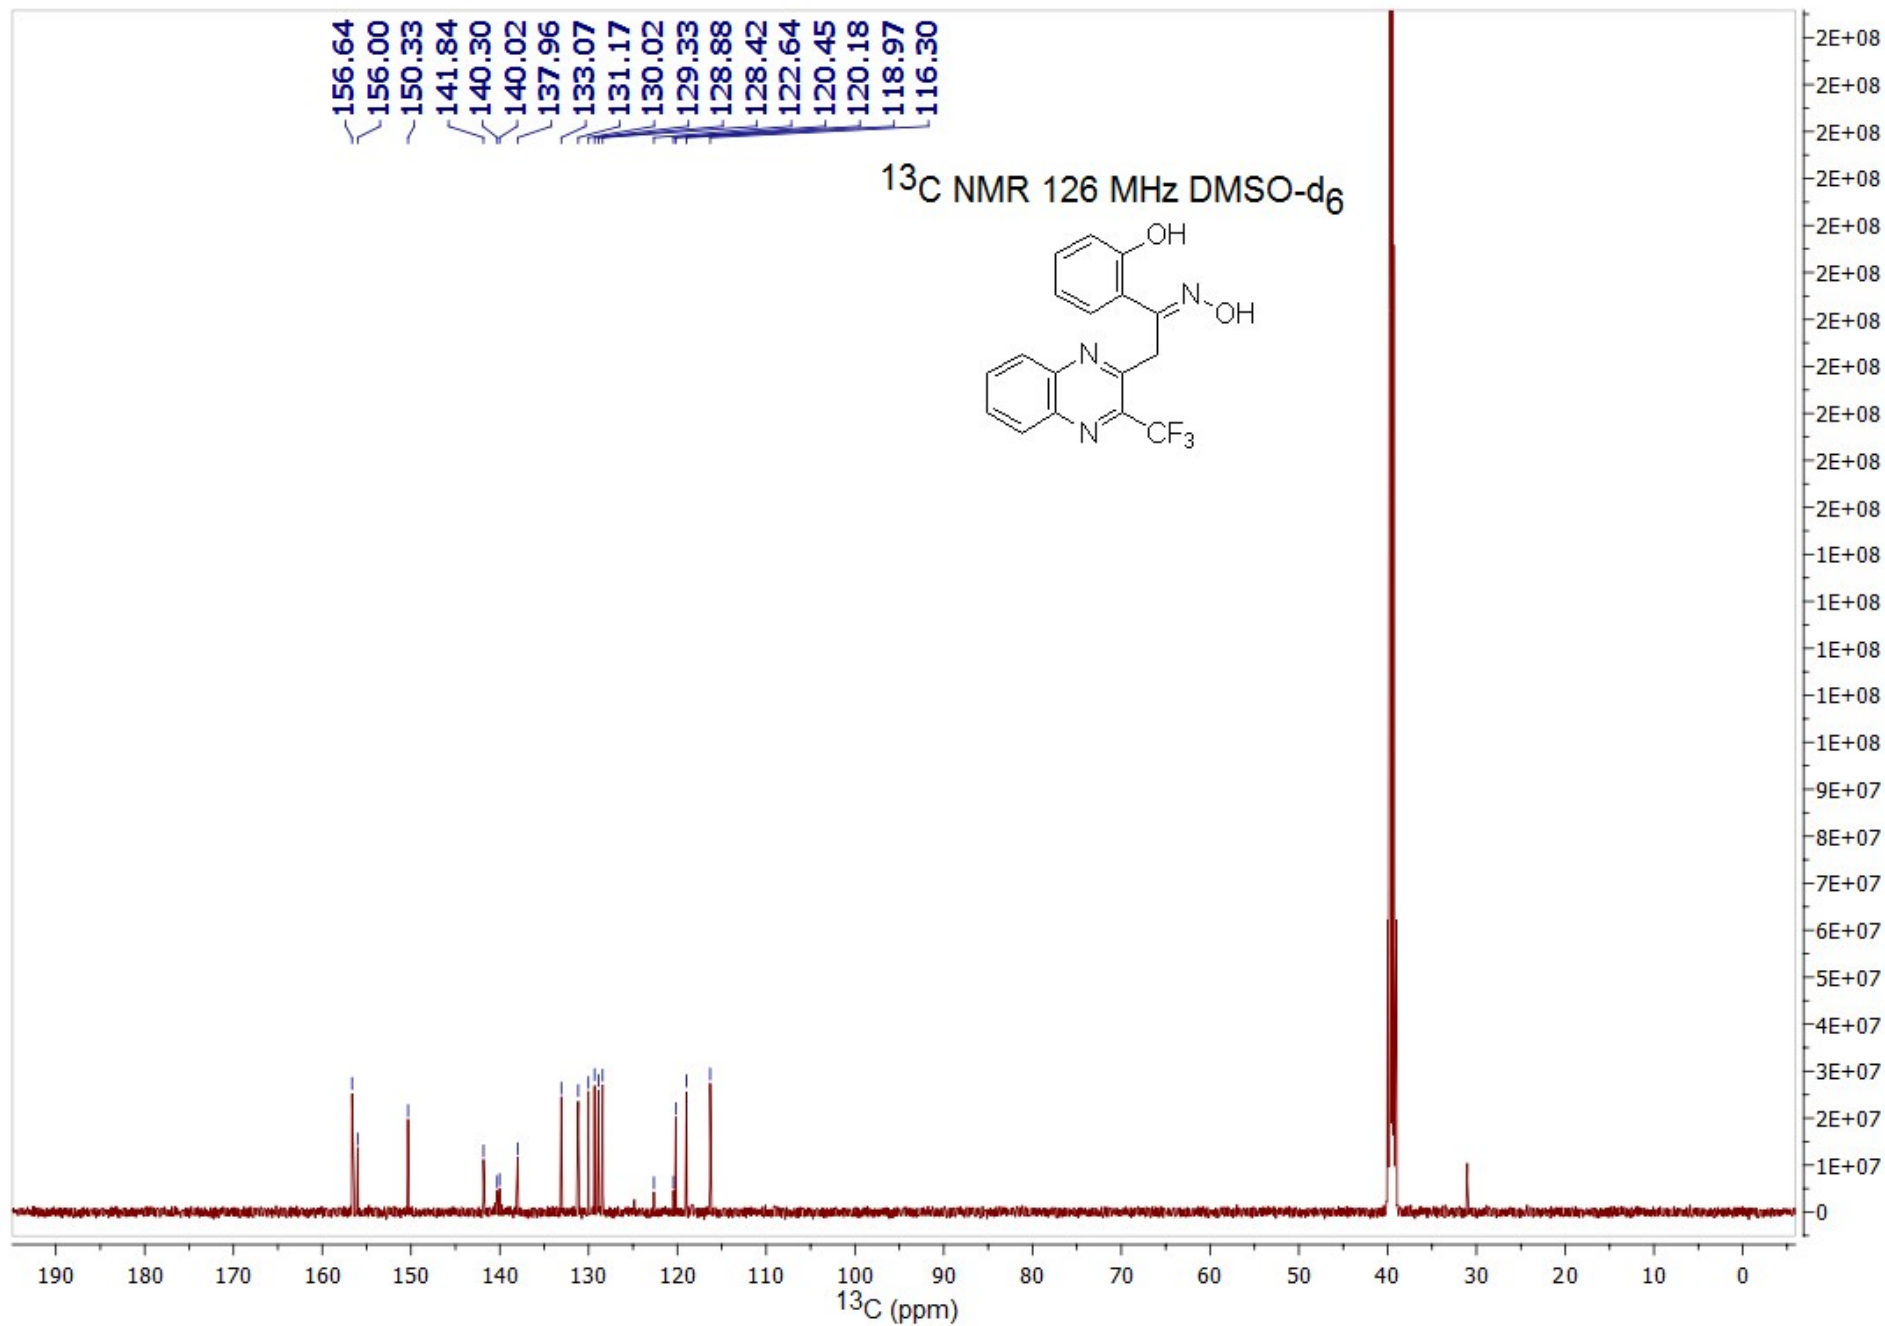

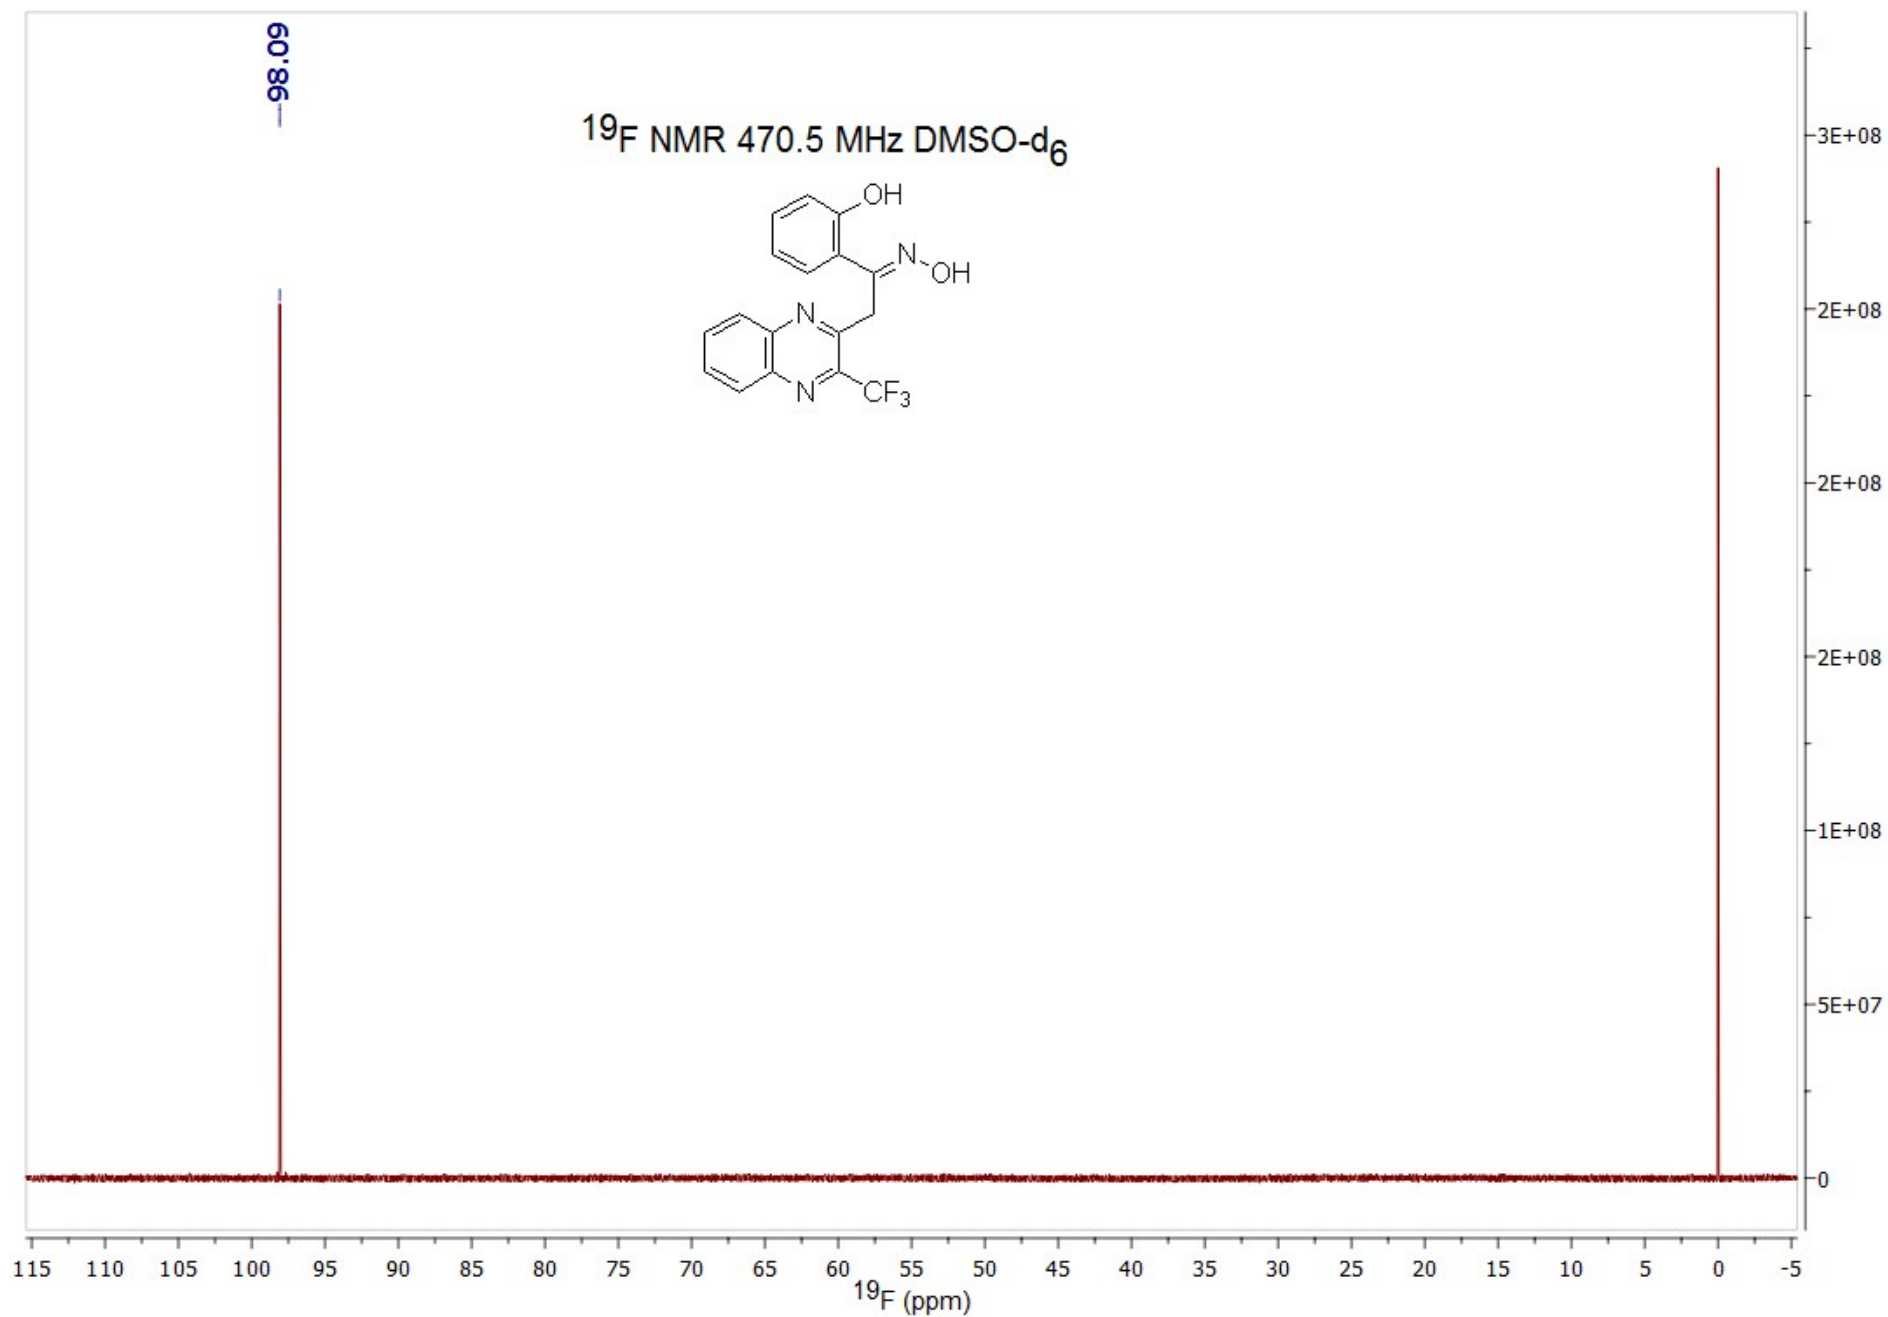

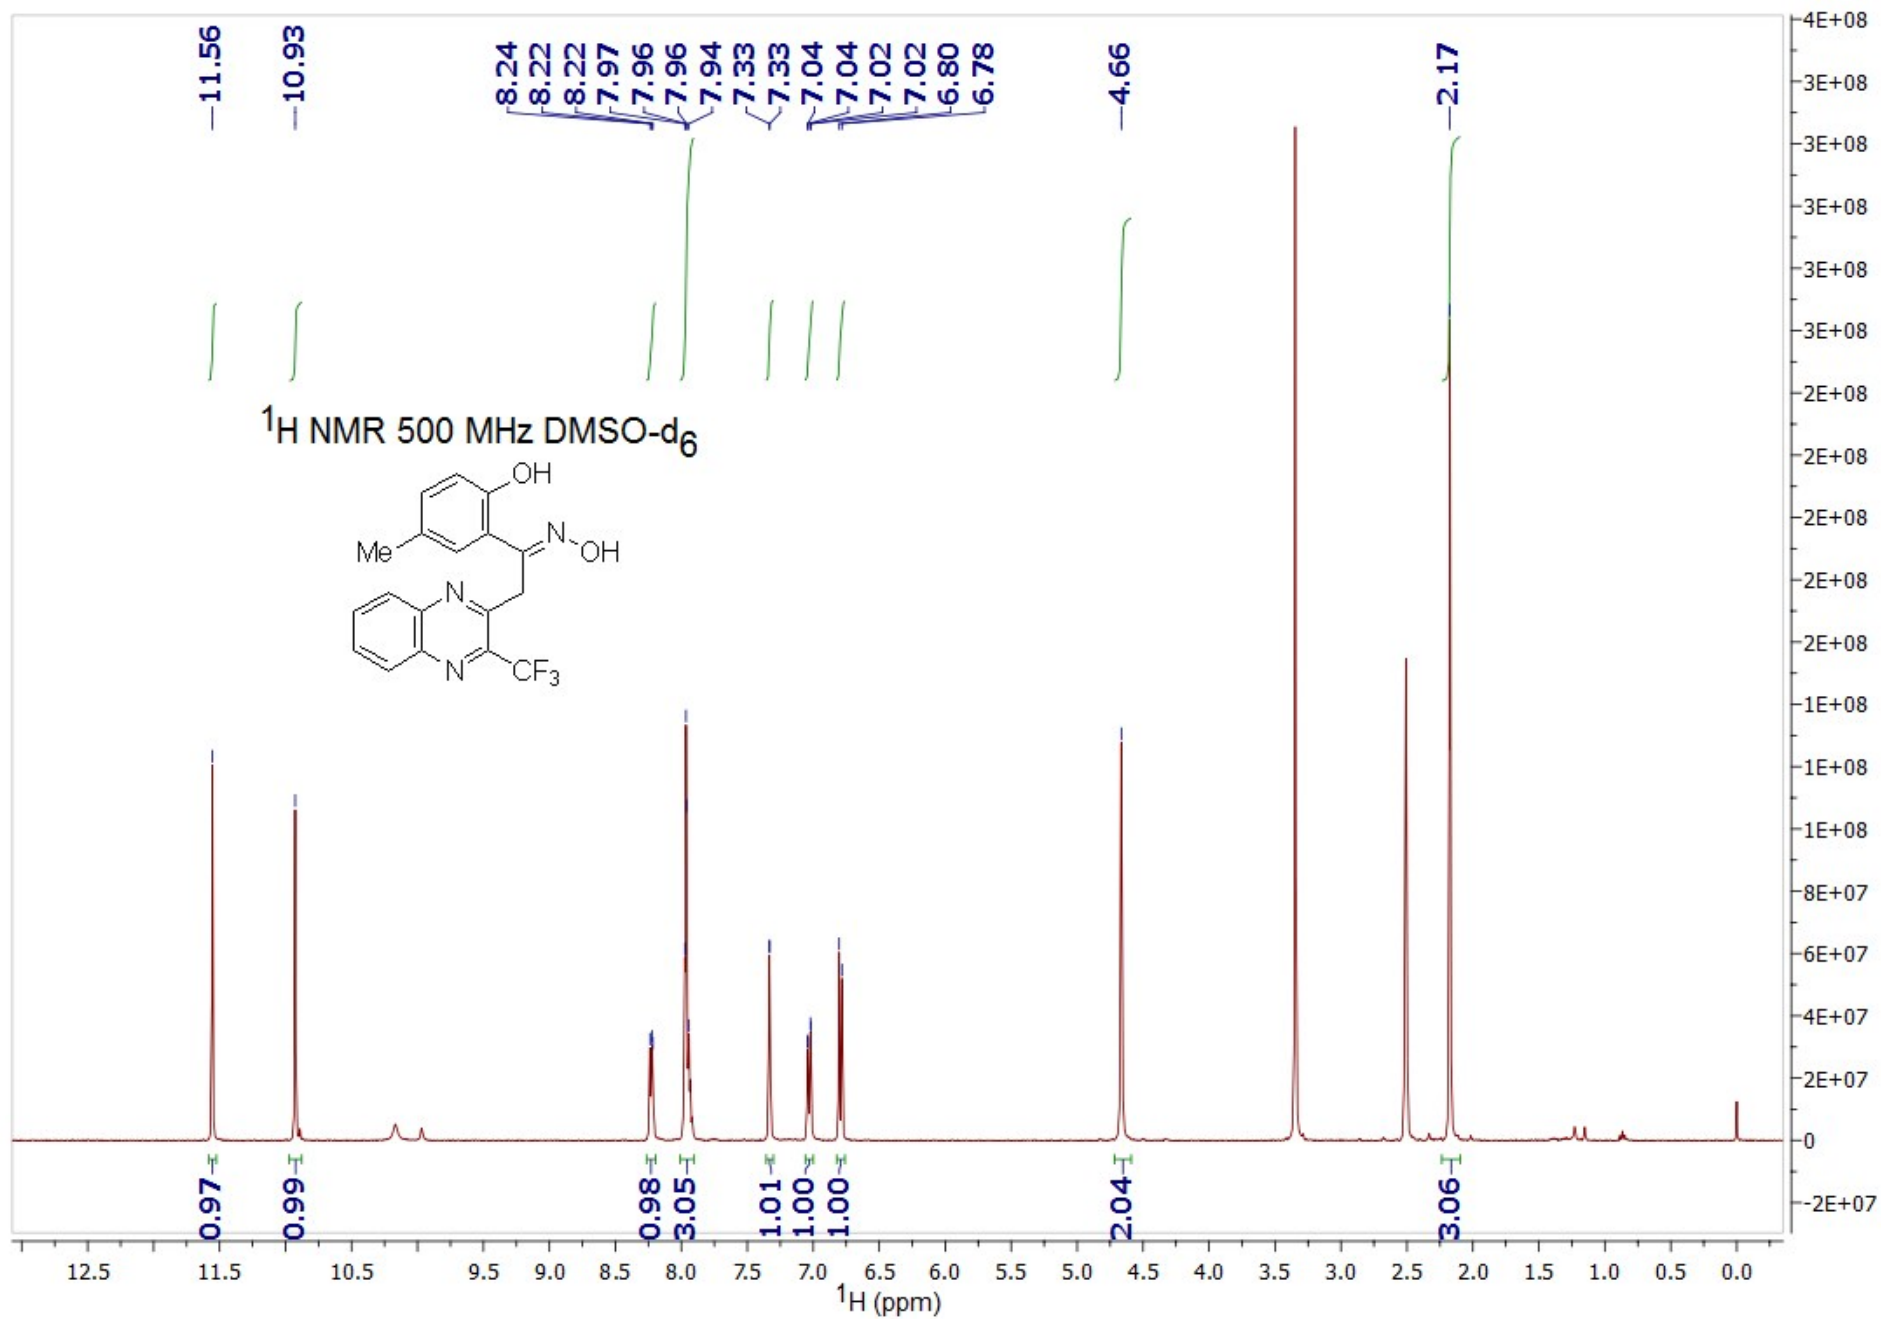

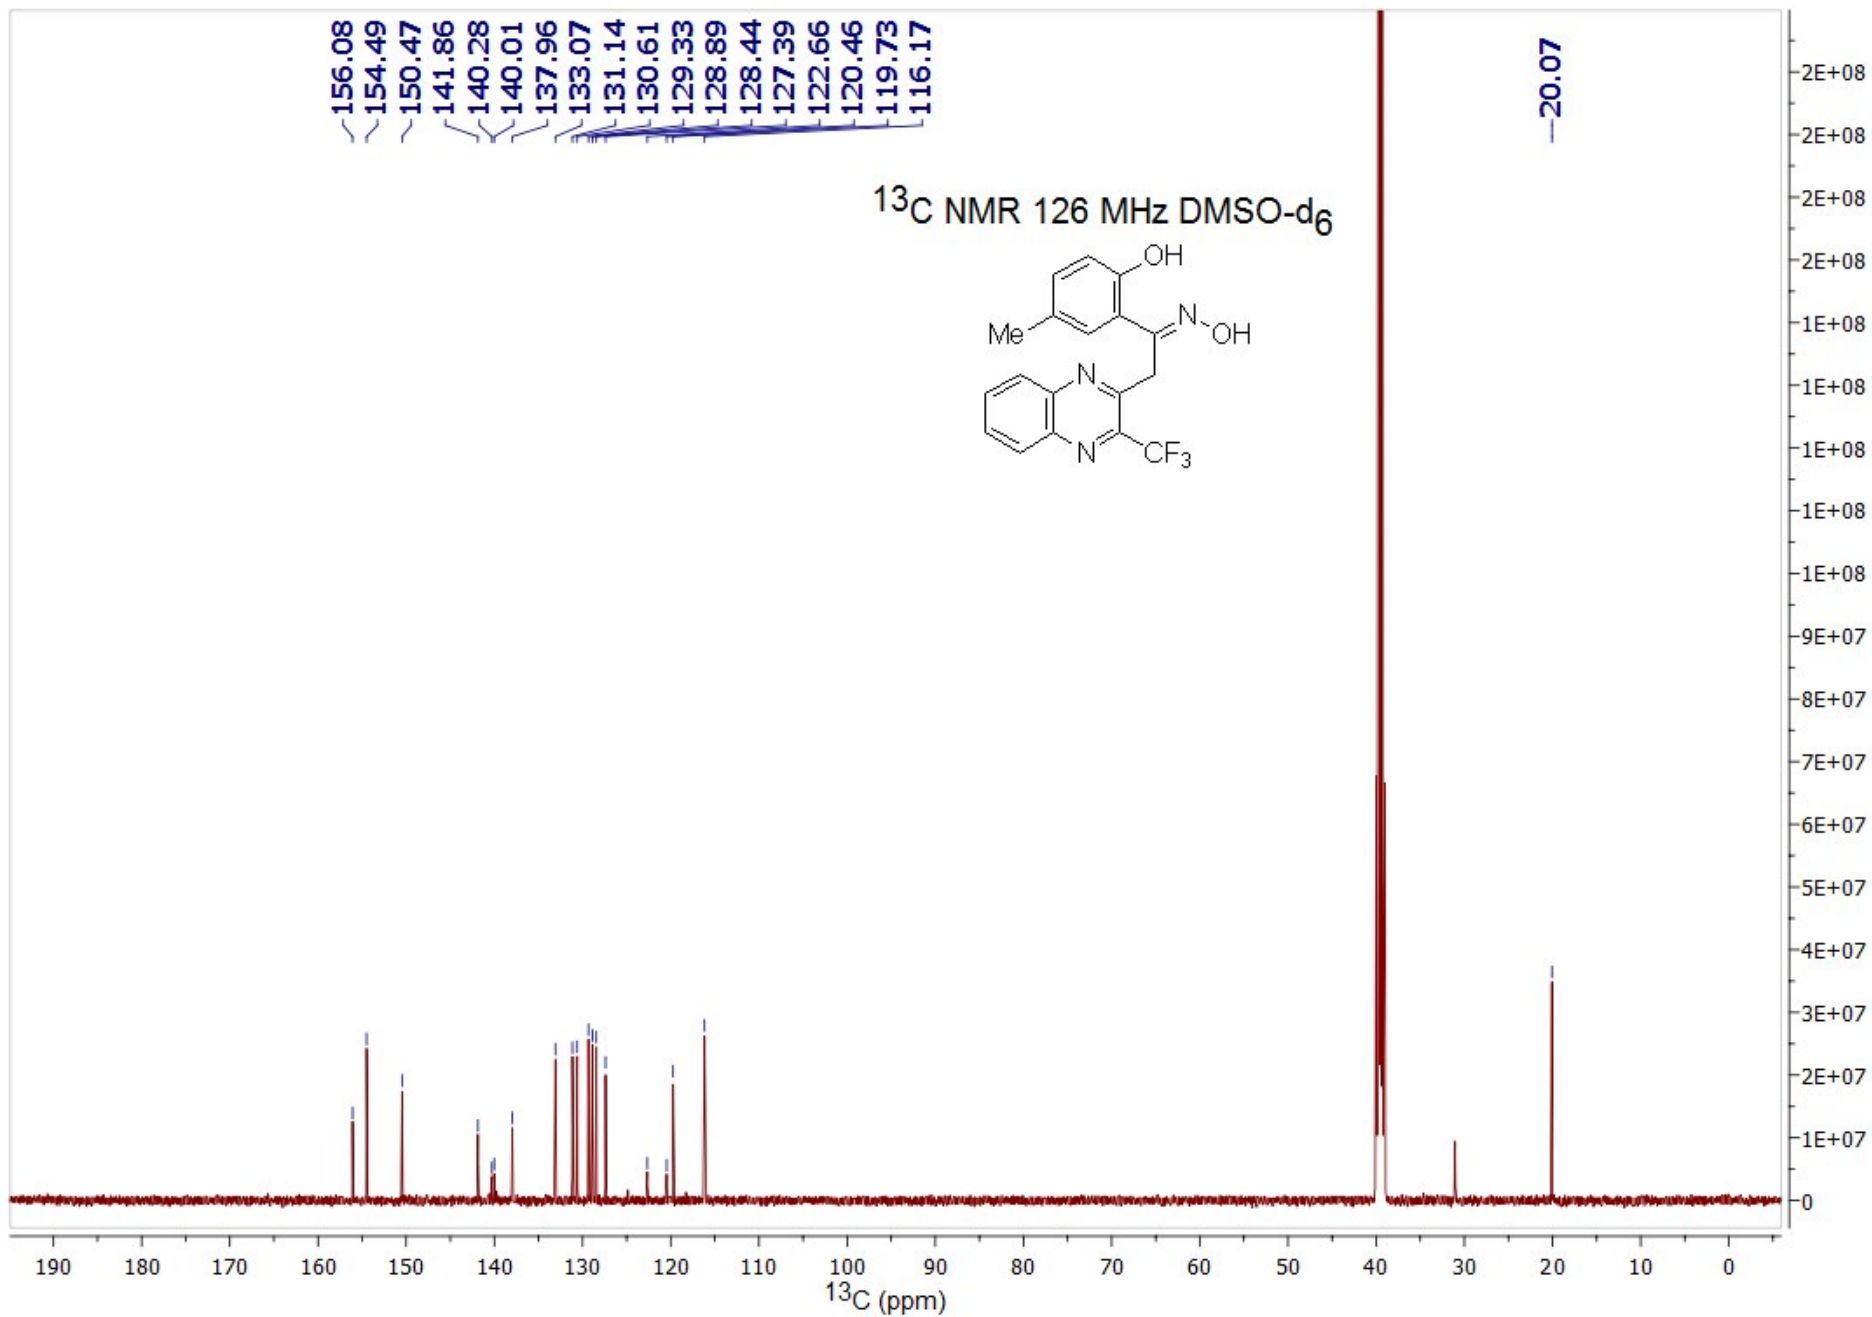

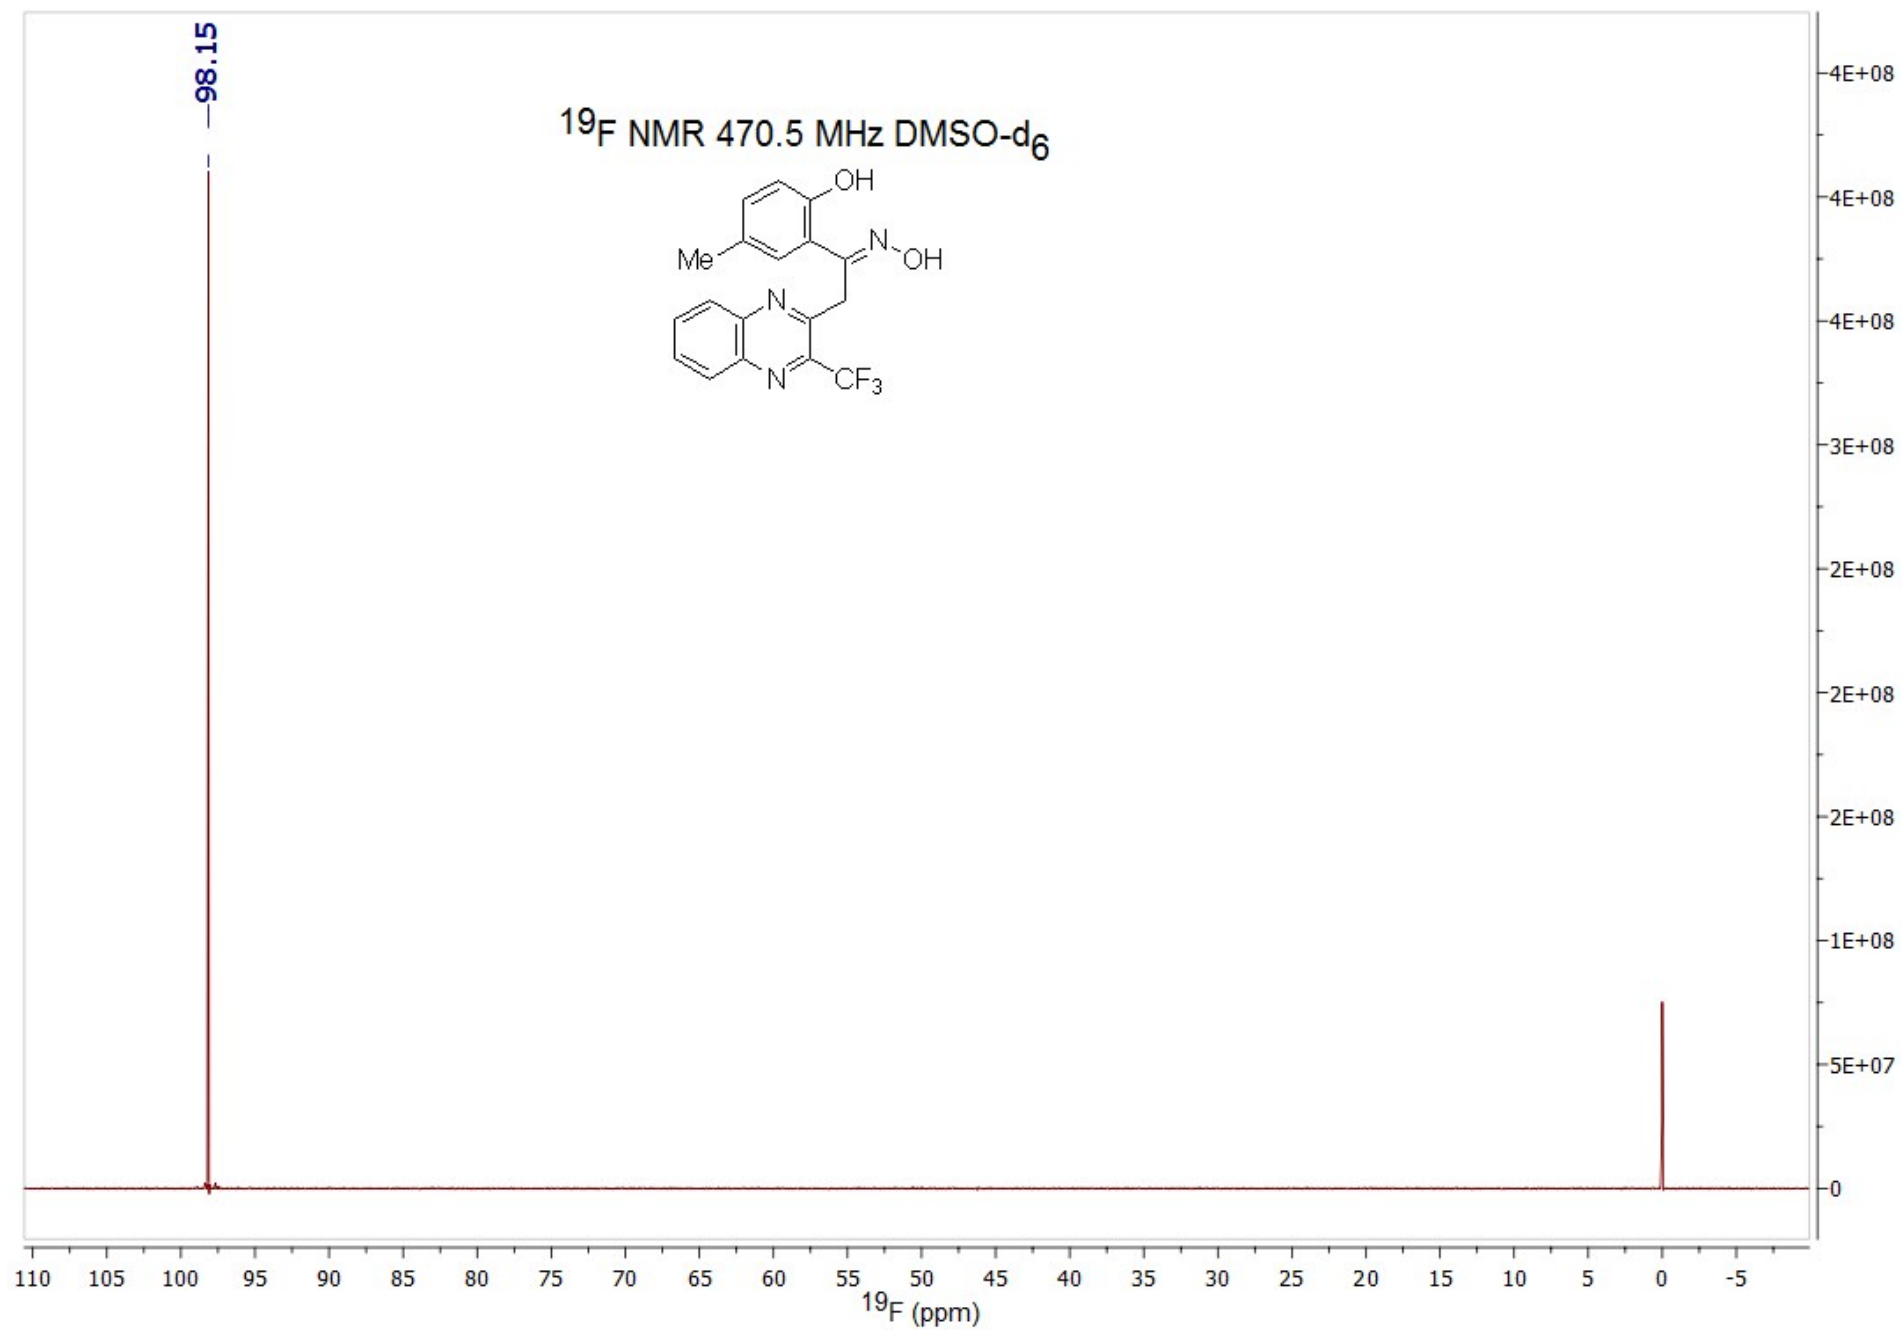

Supplement: c5ra27032d1.pdf [file c5ra27032d1.pdf]
